# Supplementary material for: Efficacy of N,N‘bis-(2-mercaptoethyl) isophthalamide on mercury intoxication: a randomized controlled trial
Source: PubMed Central journal article supplement (PMC5813329; doi:10.1186/s12940-018-0358-1), 2018-02-14
Supplement: 12940_2018_358_MOESM1_ESM.pdf [file 12940_2018_358_MOESM1_ESM.pdf]

Table D1.1 Subject disposition (All randomised patients)

| Disposition                            | NBMI100mg<br>(n=13) | NBMI300mg<br>(n=11) | Placebo<br>(n=12) | Total<br>(n=36) |
|----------------------------------------|---------------------|---------------------|-------------------|-----------------|
| <b>Subjects enrolled</b>               |                     |                     |                   | 36              |
| <b>Subjects randomised</b>             | 13 (100.0%)         | 11 (100.0%)         | 12 (100.0%)       | 36 (100.0%)     |
| Subjects not randomised                |                     |                     |                   | 0               |
| <b>Patients randomised and treated</b> | 13 (100.0%)         | 11 (100.0%)         | 12 (100.0%)       | 36 (100.0%)     |
| <b>Patients who completed study</b>    | 13 (100.0%)         | 11 (100.0%)         | 12 (100.0%)       | 36 (100.0%)     |

Executed script: \\SDS-SERVER2\SAS\$\SDS3\Projects\STATISTICS DRUG DEV\NBMI4011 - CTI002\Analyser\Script\SAS\T\_ds001.sas, on: 23MAY2016:14:05, by: maria.lidsell

Version of source data: nbmi\_end.sas7bdat, last modified: 24FEB16:23:13, status: Final

Table D2.1 Analysis set populations (All randomised patients)

| Population              | NBMI100mg<br>(n=13) | NBMI300mg<br>(n=11) | Placebo<br>(n=12) | Total<br>(n=36) |
|-------------------------|---------------------|---------------------|-------------------|-----------------|
| All subjects            |                     |                     |                   | 36              |
| All randomised patients | 13 (100.0%)         | 11 (100.0%)         | 12 (100.0%)       | 36 (100.0%)     |
| Safety set              | 13 (100.0%)         | 11 (100.0%)         | 12 (100.0%)       | 36 (100.0%)     |
| Full analysis set       | 13 (100.0%)         | 11 (100.0%)         | 12 (100.0%)       | 36 (100.0%)     |
| Per protocol population | 13 (100.0%)         | 10 (90.9%)          | 9 (75.0%)         | 32 (88.9%)      |
| PK analysis set         | 13 (100.0%)         | 10 (90.9%)          |                   | 23 (63.9%)      |

Executed script: \\SDS-SERVER2\SAS\$\SDS3\Projects\STATISTICS DRUG DEV\NBMI4011 - CTI002\Analyser\Script\SAS\T\_ds002.sas, on: 23MAY2016:14:05, by: maria.lidsell

Version of source data: nbmi\_end.sas7bdat, last modified: 24FEB16:23:13, status: Final

Table D3.1 Demographic characteristics (All randomised patients)

| Variable      | Category | NBMI100mg<br>(n=13) | NBMI300mg<br>(n=11) | Placebo<br>(n=12) | Total<br>(n=36) |
|---------------|----------|---------------------|---------------------|-------------------|-----------------|
| Age (years)   | n        | 13 (100.0%)         | 11 (100.0%)         | 12 (100.0%)       | 36 (100.0%)     |
|               | Mean     | 43.6                | 38.5                | 33.3              | 38.6            |
|               | SD       | 10.23               | 10.48               | 8.25              | 10.37           |
|               | Median   | 47                  | 39                  | 32.5              | 39.5            |
|               | Min      | 22                  | 26                  | 19                | 19              |
|               | Max      | 56                  | 59                  | 47                | 59              |
| Sex           | n        | 13 (100.0%)         | 11 (100.0%)         | 12 (100.0%)       | 36 (100.0%)     |
|               | MALE     | 13 (100.0%)         | 11 (100.0%)         | 12 (100.0%)       | 36 (100.0%)     |
| Ethnic Origin | n        | 13 (100.0%)         | 11 (100.0%)         | 12 (100.0%)       | 36 (100.0%)     |
|               | HISPANIC | 13 (100.0%)         | 11 (100.0%)         | 12 (100.0%)       | 36 (100.0%)     |

Executed script: \\SDS-SERVER2\SAS\$\SDS3\Projects\STATISTICS DRUG DEV\NBMI4011 - CTI002\Analyser\Script\SAS\T\_dm001.sas, on: 23MAY2016:14:05, by: maria.lidsell

Version of source data: nbmi\_dem.sas7bdat, last modified: 24FEB16:23:13, status: Final

Table D4.1 Subject characteristics - work exposure and fish consumption (All randomised patients)

| Variable                                                                                  | Category                       | NBMI100mg<br>(n=13) | NBMI300mg<br>(n=11) | Placebo<br>(n=12) | Total<br>(n=36) |
|-------------------------------------------------------------------------------------------|--------------------------------|---------------------|---------------------|-------------------|-----------------|
| Work Exposure, Living, years                                                              | n                              | 13 (100.0%)         | 11 (100.0%)         | 12 (100.0%)       | 36 (100.0%)     |
|                                                                                           | Mean                           | 25.8                | 18.1                | 27.6              | 24.1            |
|                                                                                           | SD                             | 16.42               | 14.59               | 13.71             | 15.13           |
|                                                                                           | Median                         | 22                  | 15                  | 31                | 26              |
|                                                                                           | Min                            | 3                   | 1.5                 | 1                 | 1               |
|                                                                                           | Max                            | 54                  | 50                  | 47                | 54              |
| Work Exposure, Working with mercury, yea                                                  | n                              | 13 (100.0%)         | 11 (100.0%)         | 12 (100.0%)       | 36 (100.0%)     |
|                                                                                           | Mean                           | 12.3                | 8.7                 | 14                | 11.8            |
|                                                                                           | SD                             | 6.59                | 8.19                | 13.32             | 9.72            |
|                                                                                           | Median                         | 15                  | 5                   | 12                | 10              |
|                                                                                           | Min                            | 1                   | 1.5                 | 0.5               | 0.5             |
|                                                                                           | Max                            | 20                  | 30                  | 40                | 40              |
| Work Exposure, Smelting amalgam to recover the gold, Yes-No                               | n                              | 13 (100.0%)         | 11 (100.0%)         | 12 (100.0%)       | 36 (100.0%)     |
|                                                                                           | Y                              | 13 (100.0%)         | 7 (63.6%)           | 9 (75.0%)         | 29 (80.6%)      |
|                                                                                           | N                              |                     | 4 (36.4%)           | 3 (25.0%)         | 7 (19.4%)       |
| Work Exposure, Handling mercury to extract the gold from the ore, but no smelting, Yes-No | n                              | 13 (100.0%)         | 11 (100.0%)         | 12 (100.0%)       | 36 (100.0%)     |
|                                                                                           | Y                              | 6 (46.2%)           | 4 (36.4%)           | 3 (25.0%)         | 13 (36.1%)      |
|                                                                                           | N                              | 7 (53.8%)           | 7 (63.6%)           | 9 (75.0%)         | 23 (63.9%)      |
| Work Exposure, Smelting gold / gold buyer, Yes-No                                         | n                              | 13 (100.0%)         | 11 (100.0%)         | 12 (100.0%)       | 36 (100.0%)     |
|                                                                                           | Y                              |                     | 2 (18.2%)           | 2 (16.7%)         | 4 (11.1%)       |
|                                                                                           | N                              | 13 (100.0%)         | 9 (81.8%)           | 10 (83.3%)        | 32 (88.9%)      |
| Work Exposure, Another job or no job, Yes-No                                              | n                              | 13 (100.0%)         | 11 (100.0%)         | 12 (100.0%)       | 36 (100.0%)     |
|                                                                                           | Y                              |                     | 2 (18.2%)           | 1 (8.3%)          | 3 (8.3%)        |
|                                                                                           | N                              | 13 (100.0%)         | 9 (81.8%)           | 11 (91.7%)        | 33 (91.7%)      |
| Fish Consumption                                                                          | n                              | 13 (100.0%)         | 11 (100.0%)         | 12 (100.0%)       | 36 (100.0%)     |
|                                                                                           | AT LEAST ONCE A WEEK           | 9 (69.2%)           | 6 (54.5%)           | 8 (66.7%)         | 23 (63.9%)      |
|                                                                                           | NEVER OR LESS THAN ONCE A WEEK | 4 (30.8%)           | 5 (45.5%)           | 4 (33.3%)         | 13 (36.1%)      |

Executed script: \\SDS-SERVER2\SAS\$\SDS3\Projects\STATISTICS DRUG DEV\NBMI4011 - CTI002\Analyser\Script\SAS\T\_dm002.sas, on: 23MAY2016:14:06, by: maria.lidsell

Version of source data: nbmi\_dem.sas7bdat, last modified: 24FEB16:23:13, status: Final

Table D5.1 Summary of past medical history (All randomised patients)

| Preferred term                                   | Number (%) of patients |                     |                   |                 |
|--------------------------------------------------|------------------------|---------------------|-------------------|-----------------|
|                                                  | NBMI100mg<br>(n=13)    | NBMI300mg<br>(n=11) | Placebo<br>(n=12) | Total<br>(n=36) |
| Number of patients with any past medical history | 6 (46.2%)              | 4 (36.4%)           | 5 (41.7%)         | 15 (41.7%)      |
| GASTRITIS                                        | 1 (7.7%)               | 1 (9.1%)            | 1 (8.3%)          | 3 (8.3%)        |
| APPENDICECTOMY                                   | 1 (7.7%)               | 1 (9.1%)            |                   | 2 (5.6%)        |
| NEPHROLITHIASIS                                  | 1 (7.7%)               |                     | 1 (8.3%)          | 2 (5.6%)        |
| PNEUMONIA                                        | 1 (7.7%)               | 1 (9.1%)            |                   | 2 (5.6%)        |
| ACCIDENT                                         | 1 (7.7%)               |                     |                   | 1 (2.8%)        |
| ALCOHOL POISONING                                | 1 (7.7%)               |                     |                   | 1 (2.8%)        |
| CHOLECYSTECTOMY                                  |                        | 1 (9.1%)            |                   | 1 (2.8%)        |
| CRANIOCEREBRAL INJURY                            |                        |                     | 1 (8.3%)          | 1 (2.8%)        |
| DENGUE FEVER                                     | 1 (7.7%)               |                     |                   | 1 (2.8%)        |
| GASTRIC ULCER                                    |                        |                     | 1 (8.3%)          | 1 (2.8%)        |
| GASTROENTERITIS                                  |                        |                     | 1 (8.3%)          | 1 (2.8%)        |
| HEPATITIS                                        |                        |                     | 1 (8.3%)          | 1 (2.8%)        |
| HEPATITIS A                                      | 1 (7.7%)               |                     |                   | 1 (2.8%)        |
| LOWER LIMB FRACTURE                              |                        | 1 (9.1%)            |                   | 1 (2.8%)        |
| RECTAL PROLAPSE                                  |                        | 1 (9.1%)            |                   | 1 (2.8%)        |
| THROMBOCYTOPENIA                                 |                        |                     | 1 (8.3%)          | 1 (2.8%)        |
| YELLOW FEVER                                     | 1 (7.7%)               |                     |                   | 1 (2.8%)        |

Executed script: \\SDS-SERVER2\SAS\$\SDS3\Projects\STATISTICS DRUG DEV\NBMI4011 - CTI002\Analyser\Script\SAS\T\_mh001.sas, on: 23MAY2016:14:06, by: maria.lidsell

Version of source data: nbmi\_ma1.sas7bdat, last modified: 24FEB16:23:13, status: Final

Dictionary version: MedDRA 18.1

Table R1.1 Summary of urine Hg at Screening (All randomised patients)

| Variable                       | Category | NBMI100mg<br>(n=13) | NBMI300mg<br>(n=11) | Placebo<br>(n=12) | Total<br>(n=36) |
|--------------------------------|----------|---------------------|---------------------|-------------------|-----------------|
| Biomonitoring Hg Urine, Result | n        | 13 (100.0%)         | 11 (100.0%)         | 12 (100.0%)       | 36 (100.0%)     |
|                                | Mean     | 54.2                | 60.7                | 43.9              | 52.8            |
|                                | SD       | 31.91               | 52.13               | 39.21             | 40.7            |
|                                | Median   | 46                  | 48                  | 32                | 35.5            |
|                                | Min      | 25                  | 15                  | 16                | 15              |
|                                | Max      | 138                 | 163                 | 134               | 163             |

Executed script: \\SDS-SERVER2\SAS\$\SDS3\Projects\STATISTICS DRUG DEV\NBMI4011 - CTI002\Analyser\Script\SAS\T\_hgu001.sas, on: 23MAY2016:14:04,  
by: maria.lidsell  
Version of source data: nbmi\_bi2.sas7bdat, last modified: 24FEB16:23:13, status: Final

Table R2.1 Summary of chronic mercury intoxication symptoms at Screening (All randomised patients)

| Variable                                   | Category* | NBMI100mg<br>(n=13) | NBMI300mg<br>(n=11) | Placebo<br>(n=12) | Total<br>(n=36) |
|--------------------------------------------|-----------|---------------------|---------------------|-------------------|-----------------|
| 1. Metallic taste                          | n         | 9 (69.2%)           | 7 (63.6%)           | 8 (66.7%)         | 24 (66.7%)      |
|                                            | N         | 5 (38.5%)           | 6 (54.5%)           | 6 (50.0%)         | 17 (47.2%)      |
|                                            | YES       | 4 (30.8%)           | 1 (9.1%)            | 2 (16.7%)         | 7 (19.4%)       |
| 2. Irritability                            | n         | 9 (69.2%)           | 7 (63.6%)           | 8 (66.7%)         | 24 (66.7%)      |
|                                            | ABSENT    | 2 (15.4%)           | 1 (9.1%)            |                   | 3 (8.3%)        |
|                                            | SLIGHT    | 6 (46.2%)           | 3 (27.3%)           | 6 (50.0%)         | 15 (41.7%)      |
| 3. Social nervousness and/or withdrawal    | n         | 9 (69.2%)           | 7 (63.6%)           | 8 (66.7%)         | 24 (66.7%)      |
|                                            | ABSENT    | 4 (30.8%)           | 3 (27.3%)           | 4 (33.3%)         | 11 (30.6%)      |
|                                            | SLIGHT    | 4 (30.8%)           | 2 (18.2%)           | 4 (33.3%)         | 10 (27.8%)      |
| 4. Memory loss                             | n         | 9 (69.2%)           | 7 (63.6%)           | 8 (66.7%)         | 24 (66.7%)      |
|                                            | ABSENT    | 5 (38.5%)           | 3 (27.3%)           | 4 (33.3%)         | 12 (33.3%)      |
|                                            | SLIGHT    | 4 (30.8%)           | 2 (18.2%)           | 3 (25.0%)         | 9 (25.0%)       |
| 5. Mental fatigue                          | n         | 9 (69.2%)           | 7 (63.6%)           | 8 (66.7%)         | 24 (66.7%)      |
|                                            | ABSENT    | 4 (30.8%)           | 2 (18.2%)           | 3 (25.0%)         | 9 (25.0%)       |
|                                            | SLIGHT    | 3 (23.1%)           | 2 (18.2%)           | 3 (25.0%)         | 8 (22.2%)       |
| 6. Physical fatigue                        | n         | 9 (69.2%)           | 7 (63.6%)           | 8 (66.7%)         | 24 (66.7%)      |
|                                            | ABSENT    | 4 (30.8%)           | 2 (18.2%)           | 3 (25.0%)         | 9 (25.0%)       |
|                                            | SLIGHT    | 2 (15.4%)           | 1 (9.1%)            | 1 (8.3%)          | 4 (11.1%)       |
| Chronic mercury intoxication symptoms, sum | n         | 9 (69.2%)           | 7 (63.6%)           | 8 (66.7%)         | 24 (66.7%)      |
|                                            | Mean      | 3.3                 | 3.6                 | 3.5               | 3.5             |
|                                            | SD        | 1.73                | 1.27                | 1.31              | 1.41            |

| Variable | Category* | NBMI100mg<br>(n=13) | NBMI300mg<br>(n=11) | Placebo<br>(n=12) | Total<br>(n=36) |
|----------|-----------|---------------------|---------------------|-------------------|-----------------|
|          | Median    | 3                   | 4                   | 3.5               | 3.5             |
|          | Min       | 1                   | 1                   | 1                 | 1               |
|          | Max       | 6                   | 5                   | 5                 | 6               |

Executed script: \\SDS-SERVER2\SAS\$\SDS3\Projects\STATISTICS DRUG DEV\NBMI4011 - CTI002\Analyser\Script\SAS\T\_mi001.sas, on: 23MAY2016:14:04, by: maria.lidsell

Version of source data: nbmi\_ch2.sas7bdat, last modified: 24FEB16:23:13, status: Final

\*) Screening scores are counted according to: No=0, Yes=1, Absent=0, Slight=1, Moderate=1.

Table R3.1.1 Summary of physical and mental fatigue scores at Screening - Total scores (All randomised patients)

| Variable*                     | Category | NBMI100mg<br>(n=13) | NBMI300mg<br>(n=11) | Placebo<br>(n=12) | Total<br>(n=36) |
|-------------------------------|----------|---------------------|---------------------|-------------------|-----------------|
| Physical Fatigue Score, Total | n        | 9 (69.2%)           | 7 (63.6%)           | 8 (66.7%)         | 24 (66.7%)      |
|                               | Mean     | 3.4                 | 3                   | 3.6               | 3.4             |
|                               | SD       | 3.61                | 1.83                | 2.72              | 2.78            |
|                               | Median   | 3                   | 3                   | 4                 | 3.5             |
|                               | Min      | 0                   | 0                   | 0                 | 0               |
|                               | Max      | 11                  | 5                   | 7                 | 11              |
| Mental Fatigue Score, Total   | n        | 9 (69.2%)           | 7 (63.6%)           | 8 (66.7%)         | 24 (66.7%)      |
|                               | Mean     | 1.7                 | 1.7                 | 2.4               | 1.9             |
|                               | SD       | 1.8                 | 1.6                 | 1.41              | 1.59            |
|                               | Median   | 1                   | 1                   | 2.5               | 1.5             |
|                               | Min      | 0                   | 0                   | 1                 | 0               |
|                               | Max      | 5                   | 5                   | 5                 | 5               |

Executed script: \\SDS-SERVER2\SAS\$\SDS3\Projects\STATISTICS DRUG DEV\NBMI4011 - CTI002\Analyser\Script\SAS\T\_fs001.sas, on: 23MAY2016:14:04, by: maria.lidsell

Version of source data: nbmi\_ph4.sas7bdat, last modified: 24FEB16:23:13, status: Final

\*) Total fatigue score sum is not calculated for Screening.

Table R3.2.1 Summary of physical and mental fatigue scores at Screening - Items (All randomised patients)

| Variable                                                                             | Category*             | NBMI100mg<br>(n=13) | NBMI300mg<br>(n=11) | Placebo<br>(n=12) | Total<br>(n=36) |
|--------------------------------------------------------------------------------------|-----------------------|---------------------|---------------------|-------------------|-----------------|
| Physical Fatigue Score, tired                                                        | n                     | 9 (69.2%)           | 7 (63.6%)           | 8 (66.7%)         | 24 (66.7%)      |
|                                                                                      | same as usual         | 3 (23.1%)           | 1 (9.1%)            | 2 (16.7%)         | 6 (16.7%)       |
|                                                                                      | worse than usual      | 5 (38.5%)           | 6 (54.5%)           | 5 (41.7%)         | 16 (44.4%)      |
|                                                                                      | much worse than usual | 1 (7.7%)            |                     | 1 (8.3%)          | 2 (5.6%)        |
| Physical Fatigue Score, need to rest                                                 | n                     | 9 (69.2%)           | 7 (63.6%)           | 8 (66.7%)         | 24 (66.7%)      |
|                                                                                      | same as usual         | 5 (38.5%)           | 5 (45.5%)           | 3 (25.0%)         | 13 (36.1%)      |
|                                                                                      | worse than usual      | 3 (23.1%)           | 2 (18.2%)           | 5 (41.7%)         | 10 (27.8%)      |
|                                                                                      | much worse than usual | 1 (7.7%)            |                     |                   | 1 (2.8%)        |
| Physical Fatigue Score, feel sleepy or drowsy                                        | n                     | 9 (69.2%)           | 7 (63.6%)           | 8 (66.7%)         | 24 (66.7%)      |
|                                                                                      | same as usual         | 5 (38.5%)           | 4 (36.4%)           | 4 (33.3%)         | 13 (36.1%)      |
|                                                                                      | worse than usual      | 3 (23.1%)           | 3 (27.3%)           | 4 (33.3%)         | 10 (27.8%)      |
|                                                                                      | much worse than usual | 1 (7.7%)            |                     |                   | 1 (2.8%)        |
| Physical Fatigue Score, no longer start anything                                     | n                     | 9 (69.2%)           | 7 (63.6%)           | 8 (66.7%)         | 24 (66.7%)      |
|                                                                                      | same as usual         | 8 (61.5%)           | 5 (45.5%)           | 6 (50.0%)         | 19 (52.8%)      |
|                                                                                      | worse than usual      | 1 (7.7%)            | 2 (18.2%)           | 2 (16.7%)         | 5 (13.9%)       |
| Physical Fatigue Score, always lack energy                                           | n                     | 9 (69.2%)           | 7 (63.6%)           | 8 (66.7%)         | 24 (66.7%)      |
|                                                                                      | same as usual         | 6 (46.2%)           | 4 (36.4%)           | 3 (25.0%)         | 13 (36.1%)      |
|                                                                                      | worse than usual      | 2 (15.4%)           | 3 (27.3%)           | 5 (41.7%)         | 10 (27.8%)      |
|                                                                                      | much worse than usual | 1 (7.7%)            |                     |                   | 1 (2.8%)        |
| Physical Fatigue Score, have less strength in your muscles                           | n                     | 9 (69.2%)           | 7 (63.6%)           | 8 (66.7%)         | 24 (66.7%)      |
|                                                                                      | same as usual         | 6 (46.2%)           | 4 (36.4%)           | 6 (50.0%)         | 16 (44.4%)      |
|                                                                                      | worse than usual      | 3 (23.1%)           | 3 (27.3%)           | 2 (16.7%)         | 8 (22.2%)       |
| Physical Fatigue Score, feel weak                                                    | n                     | 9 (69.2%)           | 7 (63.6%)           | 8 (66.7%)         | 24 (66.7%)      |
|                                                                                      | same as usual         | 5 (38.5%)           | 5 (45.5%)           | 6 (50.0%)         | 16 (44.4%)      |
|                                                                                      | worse than usual      | 3 (23.1%)           | 2 (18.2%)           | 2 (16.7%)         | 7 (19.4%)       |
|                                                                                      | much worse than usual | 1 (7.7%)            |                     |                   | 1 (2.8%)        |
| Physical Fatigue Score, start things without difficulties, but get weak as you go on | n                     | 9 (69.2%)           | 7 (63.6%)           | 8 (66.7%)         | 24 (66.7%)      |
|                                                                                      | same as usual         | 8 (61.5%)           | 7 (63.6%)           | 6 (50.0%)         | 21 (58.3%)      |
|                                                                                      | worse than usual      | 1 (7.7%)            |                     | 2 (16.7%)         | 3 (8.3%)        |
| Mental Fatigue Score, problems concentrating                                         | n                     | 9 (69.2%)           | 7 (63.6%)           | 8 (66.7%)         | 24 (66.7%)      |
|                                                                                      | same as usual         | 7 (53.8%)           | 6 (54.5%)           | 4 (33.3%)         | 17 (47.2%)      |
|                                                                                      | worse than usual      | 2 (15.4%)           | 1 (9.1%)            | 4 (33.3%)         | 7 (19.4%)       |
| Mental Fatigue Score, problems thinking clearly                                      | n                     | 9 (69.2%)           | 7 (63.6%)           | 8 (66.7%)         | 24 (66.7%)      |
|                                                                                      | same as usual         | 8 (61.5%)           | 6 (54.5%)           | 5 (41.7%)         | 19 (52.8%)      |
|                                                                                      | worse than usual      | 1 (7.7%)            | 1 (9.1%)            | 3 (25.0%)         | 5 (13.9%)       |
| Mental Fatigue Score, problems to find correct words when you speak                  | n                     | 9 (69.2%)           | 7 (63.6%)           | 8 (66.7%)         | 24 (66.7%)      |
|                                                                                      | same as usual         | 5 (38.5%)           | 4 (36.4%)           | 4 (33.3%)         | 13 (36.1%)      |

| Variable                                      | Category*             | NBMI100mg<br>(n=13) | NBMI300mg<br>(n=11) | Placebo<br>(n=12) | Total<br>(n=36) |
|-----------------------------------------------|-----------------------|---------------------|---------------------|-------------------|-----------------|
| Mental Fatigue Score, problems with eyestrain | worse than usual      | 4 (30.8%)           | 3 (27.3%)           | 4 (33.3%)         | 11 (30.6%)      |
|                                               | n                     | 9 (69.2%)           | 7 (63.6%)           | 8 (66.7%)         | 24 (66.7%)      |
|                                               | same as usual         | 5 (38.5%)           | 3 (27.3%)           | 5 (41.7%)         | 13 (36.1%)      |
| Mental Fatigue Score, problems with memory    | worse than usual      | 4 (30.8%)           | 4 (36.4%)           | 3 (25.0%)         | 11 (30.6%)      |
|                                               | n                     | 9 (69.2%)           | 7 (63.6%)           | 8 (66.7%)         | 24 (66.7%)      |
|                                               | same as usual         | 6 (46.2%)           | 4 (36.4%)           | 3 (25.0%)         | 13 (36.1%)      |
|                                               | worse than usual      | 2 (15.4%)           | 3 (27.3%)           | 5 (41.7%)         | 10 (27.8%)      |
|                                               | much worse than usual | 1 (7.7%)            |                     |                   | 1 (2.8%)        |

Executed script: \\SDS-SERVER2\SAS\$\SDS3\Projects\STATISTICS DRUG DEV\NBMI4011 - CTI002\Analyser\Script\SAS\T\_fs001.sas, on: 23MAY2016:14:04, by: maria.lidsell

Version of source data: nbmi\_ph4.sas7bdat, last modified: 24FEB16:23:13, status: Final

\*) Screening scores are counted according to: same as usual=0, worse than usual=1, much worse than usual=2.

Table R4.1 Summary of abnormal physical examination findings at Screening (All randomised patients)

| Area of the examination                      | Number (%) of patients |                     |                   |                 |
|----------------------------------------------|------------------------|---------------------|-------------------|-----------------|
|                                              | NBMI100mg<br>(n=13)    | NBMI300mg<br>(n=11) | Placebo<br>(n=12) | Total<br>(n=36) |
| Number of patients with any abnormal finding | 10 (76.9%)             | 9 (81.8%)           | 10 (83.3%)        | 29 (80.6%)      |
| Neurological examination                     | 10 (76.9%)             | 8 (72.7%)           | 9 (75.0%)         | 27 (75.0%)      |
| General Condition                            | 7 (53.8%)              | 3 (27.3%)           | 4 (33.3%)         | 14 (38.9%)      |
| Abdomen                                      | 6 (46.2%)              | 4 (36.4%)           | 1 (8.3%)          | 11 (30.6%)      |
| Other                                        | 2 (15.4%)              | 1 (9.1%)            | 3 (25.0%)         | 6 (16.7%)       |
| Cardiovascular system                        | 1 (7.7%)               | 1 (9.1%)            |                   | 2 (5.6%)        |
| Lungs                                        | 1 (7.7%)               |                     |                   | 1 (2.8%)        |

Executed script: \\SDS-SERVER2\SAS\$\SDS3\Projects\STATISTICS DRUG DEV\NBMI4011 - CTI002\Analyser\Script\SAS\T\_pe001.sas, on: 23MAY2016:14:04, by: maria.lidsell

Version of source data: nbmi\_ph2.sas7bdat, last modified: 24FEB16:23:13, status: Final

Table R5.1 Summary of vital signs at Screening (All randomised patients)

| Variable                                 | Category | NBMI100mg<br>(n=13) | NBMI300mg<br>(n=11) | Placebo<br>(n=12) | Total<br>(n=36) |
|------------------------------------------|----------|---------------------|---------------------|-------------------|-----------------|
| Diastolic BP (mmHg)                      | n        | 13 (100.0%)         | 11 (100.0%)         | 12 (100.0%)       | 36 (100.0%)     |
|                                          | Mean     | 71.5                | 72.2                | 70.1              | 71.2            |
|                                          | SD       | 8.76                | 10.69               | 11.53             | 10.08           |
|                                          | Median   | 70                  | 73                  | 70                | 70              |
|                                          | Min      | 58                  | 57                  | 50                | 50              |
|                                          | Max      | 84                  | 90                  | 86                | 90              |
| Systolic BP (mmHg)                       | n        | 13 (100.0%)         | 11 (100.0%)         | 12 (100.0%)       | 36 (100.0%)     |
|                                          | Mean     | 116.5               | 113.5               | 113.7             | 114.6           |
|                                          | SD       | 7.8                 | 18.97               | 14.61             | 13.88           |
|                                          | Median   | 120                 | 110                 | 112.5             | 111             |
|                                          | Min      | 105                 | 90                  | 90                | 90              |
|                                          | Max      | 130                 | 160                 | 135               | 160             |
| Heart rate (bpm)                         | n        | 13 (100.0%)         | 11 (100.0%)         | 12 (100.0%)       | 36 (100.0%)     |
|                                          | Mean     | 75.6                | 78.9                | 70.5              | 74.9            |
|                                          | SD       | 4.68                | 10.23               | 5.71              | 7.72            |
|                                          | Median   | 76                  | 76                  | 68                | 74.5            |
|                                          | Min      | 66                  | 64                  | 64                | 64              |
|                                          | Max      | 82                  | 99                  | 82                | 99              |
| Body weight (kg)                         | n        | 13 (100.0%)         | 11 (100.0%)         | 12 (100.0%)       | 36 (100.0%)     |
|                                          | Mean     | 75.1                | 79.8                | 82.8              | 79.1            |
|                                          | SD       | 14.96               | 13.69               | 10.7              | 13.3            |
|                                          | Median   | 72                  | 78                  | 81.25             | 78.5            |
|                                          | Min      | 54.5                | 63                  | 62                | 54.5            |
|                                          | Max      | 103                 | 107                 | 104               | 107             |
| Height (cm)                              | n        | 13 (100.0%)         | 11 (100.0%)         | 12 (100.0%)       | 36 (100.0%)     |
|                                          | Mean     | 162.2               | 169.3               | 167.9             | 166.3           |
|                                          | SD       | 6.12                | 9.06                | 6.43              | 7.7             |
|                                          | Median   | 164                 | 167                 | 168               | 166             |
|                                          | Min      | 151                 | 161                 | 157               | 151             |
|                                          | Max      | 174                 | 194                 | 181               | 194             |
| Body mass index (kg/m2) from height at s | n        | 13 (100.0%)         | 11 (100.0%)         | 12 (100.0%)       | 36 (100.0%)     |
|                                          | Mean     | 28.5                | 27.7                | 29.5              | 28.6            |
|                                          | SD       | 4.78                | 3.23                | 4.56              | 4.23            |
|                                          | Median   | 29.38               | 28.43               | 29.985            | 29.31           |
|                                          | Min      | 21.77               | 23.14               | 18.92             | 18.92           |
|                                          | Max      | 36.36               | 34.42               | 39.14             | 39.14           |

Executed script: \\SDS-SERVER2\SAS\$\SDS3\Projects\STATISTICS DRUG DEV\NBMI4011 - CTI002\Analyser\Script\SAS\T\_vs001.sas, on: 23MAY2016:14:04, by: maria.lidsell

Version of source data: nbmi\_vi1.sas7bdat, last modified: 24FEB16:23:15, status: Final



Table R6.1 Summary of medical history ongoing at Screening (All randomised patients)

| Preferred term                                                   | Number (%) of patients |                     |                   |                 |
|------------------------------------------------------------------|------------------------|---------------------|-------------------|-----------------|
|                                                                  | NBMI100mg<br>(n=13)    | NBMI300mg<br>(n=11) | Placebo<br>(n=12) | Total<br>(n=36) |
| Number of patients with any medical history ongoing at Screening | 13 (100.0%)            | 11 (100.0%)         | 12 (100.0%)       | 36 (100.0%)     |
| CEREBELLAR SYNDROME                                              | 12 (92.3%)             | 8 (72.7%)           | 10 (83.3%)        | 30 (83.3%)      |
| SLEEP DISORDER                                                   | 13 (100.0%)            | 6 (54.5%)           | 11 (91.7%)        | 30 (83.3%)      |
| ATAXIA                                                           | 9 (69.2%)              | 7 (63.6%)           | 9 (75.0%)         | 25 (69.4%)      |
| IRRITABILITY                                                     | 4 (30.8%)              | 4 (36.4%)           | 5 (41.7%)         | 13 (36.1%)      |
| FATIGUE                                                          | 3 (23.1%)              | 4 (36.4%)           | 4 (33.3%)         | 11 (30.6%)      |
| GINGIVAL DISCOLOURATION                                          | 5 (38.5%)              | 4 (36.4%)           | 2 (16.7%)         | 11 (30.6%)      |
| OBESITY                                                          | 5 (38.5%)              | 2 (18.2%)           | 3 (25.0%)         | 10 (27.8%)      |
| SALIVARY HYPERSECRETION                                          | 5 (38.5%)              | 5 (45.5%)           |                   | 10 (27.8%)      |
| AMNESIA                                                          | 3 (23.1%)              | 3 (27.3%)           | 3 (25.0%)         | 9 (25.0%)       |
| MENTAL FATIGUE                                                   | 1 (7.7%)               | 4 (36.4%)           | 4 (33.3%)         | 9 (25.0%)       |
| HEADACHE                                                         | 5 (38.5%)              |                     | 2 (16.7%)         | 7 (19.4%)       |
| SOCIAL AVOIDANT BEHAVIOUR                                        | 2 (15.4%)              | 2 (18.2%)           | 2 (16.7%)         | 6 (16.7%)       |
| DYSGEUSIA                                                        | 2 (15.4%)              | 1 (9.1%)            | 1 (8.3%)          | 4 (11.1%)       |
| TREMOR                                                           | 2 (15.4%)              | 2 (18.2%)           |                   | 4 (11.1%)       |
| BACK PAIN                                                        | 1 (7.7%)               | 1 (9.1%)            |                   | 2 (5.6%)        |
| HEPATIC STEATOSIS                                                | 1 (7.7%)               | 1 (9.1%)            |                   | 2 (5.6%)        |
| WEIGHT INCREASED                                                 | 1 (7.7%)               |                     | 1 (8.3%)          | 2 (5.6%)        |
| ABDOMINAL HERNIA                                                 | 1 (7.7%)               |                     |                   | 1 (2.8%)        |
| ARTHRALGIA                                                       |                        | 1 (9.1%)            |                   | 1 (2.8%)        |
| CHRONIC OBSTRUCTIVE PULMONARY DISEASE                            | 1 (7.7%)               |                     |                   | 1 (2.8%)        |
| DIABETES MELLITUS                                                | 1 (7.7%)               |                     |                   | 1 (2.8%)        |
| ELECTROCARDIOGRAM ST SEGMENT ELEVATION                           |                        |                     | 1 (8.3%)          | 1 (2.8%)        |
| GASTRITIS                                                        |                        | 1 (9.1%)            |                   | 1 (2.8%)        |
| HYPERTENSION                                                     |                        | 1 (9.1%)            |                   | 1 (2.8%)        |
| LACTOSE INTOLERANCE                                              |                        |                     | 1 (8.3%)          | 1 (2.8%)        |
| MIGRAINE                                                         | 1 (7.7%)               |                     |                   | 1 (2.8%)        |
| PROSTATITIS                                                      |                        | 1 (9.1%)            |                   | 1 (2.8%)        |
| RHINITIS                                                         |                        | 1 (9.1%)            |                   | 1 (2.8%)        |
| SINUSITIS                                                        | 1 (7.7%)               |                     |                   | 1 (2.8%)        |
| UMBILICAL HERNIA                                                 |                        | 1 (9.1%)            |                   | 1 (2.8%)        |
| VENTRICULAR EXTRASYSTOLES                                        | 1 (7.7%)               |                     |                   | 1 (2.8%)        |

Executed script: \\SDS-SERVER2\SAS\$\SDS3\Projects\STATISTICS DRUG DEV\NBMI4011 - CTI002\Analysers\Script\SAS\T\_mh002.sas, on: 23MAY2016:14:04, by: maria.lidsell

Version of source data: nbmi\_ma1.sas7bdat, last modified: 24FEB16:23:13, status: Final

Dictionary version: MedDRA 18.1

Table DE1.1.1 Change from baseline of Mercury intoxication Medical Score, Medical score sum (calculated) (Full analysis set)

| Treatment        | Visit            | Result    |        |      |      |     |        |     |     |     |           | Change from baseline (Screening visit) |      |      |      |        |      |     |     |
|------------------|------------------|-----------|--------|------|------|-----|--------|-----|-----|-----|-----------|----------------------------------------|------|------|------|--------|------|-----|-----|
|                  |                  | n         | nmiss  | Mean | SD   | Q1  | Median | Q3  | Min | Max | n         | nmiss                                  | Mean | SD   | Q1   | Median | Q3   | Min | Max |
| Total (n=36)     | Screening        | 36 (100%) | 0 (0%) | 5.9  | 1.08 | 5   | 6      | 7   | 4   | 8   |           |                                        |      |      |      |        |      |     |     |
|                  | Follow-up day 15 | 36 (100%) | 0 (0%) | 3.3  | 1.61 | 2   | 3      | 4.5 | 0   | 7   | 36 (100%) | 0 (0%)                                 | -2.6 | 1.22 | -3   | -2.5   | -2   | -5  | 0   |
|                  | Follow-up day 45 | 36 (100%) | 0 (0%) | 3    | 1.28 | 2   | 3      | 4   | 0   | 5   | 36 (100%) | 0 (0%)                                 | -2.9 | 1.37 | -3.5 | -3     | -2   | -6  | 0   |
| NBMI100mg (n=13) | Screening        | 13 (100%) | 0 (0%) | 6.3  | 1.18 | 6   | 6      | 7   | 4   | 8   |           |                                        |      |      |      |        |      |     |     |
|                  | Follow-up day 15 | 13 (100%) | 0 (0%) | 4    | 1.63 | 3   | 4      | 5   | 1   | 7   | 13 (100%) | 0 (0%)                                 | -2.3 | 1.11 | -3   | -2     | -2   | -5  | 0   |
|                  | Follow-up day 45 | 13 (100%) | 0 (0%) | 3.7  | 0.95 | 3   | 4      | 4   | 2   | 5   | 13 (100%) | 0 (0%)                                 | -2.6 | 1.39 | -3   | -3     | -2   | -5  | 0   |
| NBMI300mg (n=11) | Screening        | 11 (100%) | 0 (0%) | 6.2  | 0.98 | 5   | 6      | 7   | 5   | 8   |           |                                        |      |      |      |        |      |     |     |
|                  | Follow-up day 15 | 11 (100%) | 0 (0%) | 3    | 1.34 | 2   | 3      | 4   | 1   | 5   | 11 (100%) | 0 (0%)                                 | -3.2 | 1.08 | -4   | -3     | -2   | -5  | -2  |
|                  | Follow-up day 45 | 11 (100%) | 0 (0%) | 3    | 1.18 | 2   | 3      | 4   | 1   | 5   | 11 (100%) | 0 (0%)                                 | -3.2 | 1.33 | -4   | -3     | -2   | -6  | -2  |
| Placebo (n=12)   | Screening        | 12 (100%) | 0 (0%) | 5.3  | 0.75 | 5   | 5      | 6   | 4   | 6   |           |                                        |      |      |      |        |      |     |     |
|                  | Follow-up day 15 | 12 (100%) | 0 (0%) | 2.8  | 1.66 | 1.5 | 2.5    | 4   | 0   | 5   | 12 (100%) | 0 (0%)                                 | -2.5 | 1.38 | -3.5 | -2.5   | -1   | -5  | -1  |
|                  | Follow-up day 45 | 12 (100%) | 0 (0%) | 2.3  | 1.37 | 1   | 2.5    | 3.5 | 0   | 4   | 12 (100%) | 0 (0%)                                 | -2.9 | 1.44 | -3.5 | -3     | -2.5 | -5  | 0   |

Executed script: \\SDS-SERVER2\SAS\$\SDS3\Projects\STATISTICS DRUG DEV\NBMI4011 - CTI002\Analyser\Script\SAS\T\_ms001.sas, on: 23MAY2016:14:00, by: maria.lidsell  
Version of source data: nbmi\_ma2.sas7bdat, last modified: 24FEB16:23:13, status: Final

Table DE1.2.1 Change from baseline of Mercury intoxication Medical Score, Match box test, sec (Full analysis set)

| Treatment        | Visit            | Result    |        | Change from baseline (Screening visit) |      |      |        |      |     |     |           |        |      |      |      |        |      |     |     |  |
|------------------|------------------|-----------|--------|----------------------------------------|------|------|--------|------|-----|-----|-----------|--------|------|------|------|--------|------|-----|-----|--|
|                  |                  | n         | nmiss  | Mean                                   | SD   | Q1   | Median | Q3   | Min | Max | n         | nmiss  | Mean | SD   | Q1   | Median | Q3   | Min | Max |  |
| Total (n=36)     | Screening        | 36 (100%) | 0 (0%) | 22.8                                   | 3.83 | 20   | 22     | 25   | 15  | 32  |           |        |      |      |      |        |      |     |     |  |
|                  | Follow-up day 15 | 36 (100%) | 0 (0%) | 18.3                                   | 3.36 | 16   | 18     | 20   | 13  | 28  | 36 (100%) | 0 (0%) | -4.5 | 3.97 | -7.5 | -4     | -2   | -14 | 4   |  |
|                  | Follow-up day 45 | 36 (100%) | 0 (0%) | 16.8                                   | 3.32 | 14   | 17     | 19   | 11  | 25  | 36 (100%) | 0 (0%) | -6   | 3.96 | -9   | -5     | -3   | -14 | 2   |  |
| NBMI100mg (n=13) | Screening        | 13 (100%) | 0 (0%) | 22.2                                   | 3.54 | 20   | 21     | 24   | 15  | 28  |           |        |      |      |      |        |      |     |     |  |
|                  | Follow-up day 15 | 13 (100%) | 0 (0%) | 18.6                                   | 2.57 | 18   | 19     | 20   | 14  | 23  | 13 (100%) | 0 (0%) | -3.6 | 3.69 | -5   | -2     | -2   | -10 | 2   |  |
|                  | Follow-up day 45 | 13 (100%) | 0 (0%) | 16.8                                   | 2.39 | 15   | 17     | 19   | 13  | 20  | 13 (100%) | 0 (0%) | -5.5 | 3.6  | -7   | -5     | -3   | -14 | -1  |  |
| NBMI300mg (n=11) | Screening        | 11 (100%) | 0 (0%) | 22.5                                   | 3.62 | 21   | 22     | 25   | 15  | 28  |           |        |      |      |      |        |      |     |     |  |
|                  | Follow-up day 15 | 11 (100%) | 0 (0%) | 18.7                                   | 4.43 | 15   | 17     | 21   | 14  | 28  | 11 (100%) | 0 (0%) | -3.8 | 3.68 | -6   | -4     | -1   | -9  | 4   |  |
|                  | Follow-up day 45 | 11 (100%) | 0 (0%) | 17.5                                   | 4.25 | 14   | 17     | 20   | 11  | 25  | 11 (100%) | 0 (0%) | -5.1 | 3.33 | -8   | -5     | -3   | -11 | 1   |  |
| Placebo (n=12)   | Screening        | 12 (100%) | 0 (0%) | 23.5                                   | 4.5  | 19.5 | 23     | 26   | 18  | 32  |           |        |      |      |      |        |      |     |     |  |
|                  | Follow-up day 15 | 12 (100%) | 0 (0%) | 17.4                                   | 3.12 | 15.5 | 17     | 18.5 | 13  | 25  | 12 (100%) | 0 (0%) | -6.1 | 4.34 | -9.5 | -6     | -2.5 | -14 | 0   |  |
|                  | Follow-up day 45 | 12 (100%) | 0 (0%) | 16.1                                   | 3.37 | 13   | 16     | 19   | 11  | 21  | 12 (100%) | 0 (0%) | -7.4 | 4.72 | -11  | -9.5   | -4.5 | -13 | 2   |  |

Executed script: \\SDS-SERVER2\SAS\$\SDS3\Projects\STATISTICS DRUG DEV\NBMI4011 - CTI002\Analyser\Script\SAS\T\_ms001.sas, on: 23MAY2016:14:00, by: maria.lidsell  
Version of source data: nbmi\_ma2.sas7bdat, last modified: 24FEB16:23:13, status: Final

Table DE1.3.1 Change from baseline of Mercury intoxication Medical Score, Pencil tapping test, taps (Full analysis set)

| Treatment        | Visit            | Result    |        |      |       |      |        |      |     |     | Change from baseline (Screening visit) |        |      |       |      |        |      |     |     |
|------------------|------------------|-----------|--------|------|-------|------|--------|------|-----|-----|----------------------------------------|--------|------|-------|------|--------|------|-----|-----|
|                  |                  | n         | nmiss  | Mean | SD    | Q1   | Median | Q3   | Min | Max | n                                      | nmiss  | Mean | SD    | Q1   | Median | Q3   | Min | Max |
| Total (n=36)     | Screening        | 36 (100%) | 0 (0%) | 45.1 | 12.43 | 40.5 | 43     | 46   | 30  | 90  |                                        |        |      |       |      |        |      |     |     |
|                  | Follow-up day 15 | 36 (100%) | 0 (0%) | 56.5 | 7.41  | 52.5 | 57     | 60   | 40  | 73  | 36 (100%)                              | 0 (0%) | 11.4 | 13.77 | 8.5  | 13     | 18   | -40 | 30  |
|                  | Follow-up day 45 | 36 (100%) | 0 (0%) | 59.9 | 7.47  | 55   | 60     | 65.5 | 44  | 77  | 36 (100%)                              | 0 (0%) | 14.8 | 13.91 | 11   | 17     | 23   | -34 | 32  |
| NBMI100mg (n=13) | Screening        | 13 (100%) | 0 (0%) | 42.6 | 15.25 | 36   | 41     | 42   | 30  | 90  |                                        |        |      |       |      |        |      |     |     |
|                  | Follow-up day 15 | 13 (100%) | 0 (0%) | 54.7 | 5.47  | 55   | 56     | 58   | 42  | 60  | 13 (100%)                              | 0 (0%) | 12.1 | 15.56 | 10   | 16     | 18   | -34 | 30  |
|                  | Follow-up day 45 | 13 (100%) | 0 (0%) | 58   | 6.86  | 56   | 58     | 62   | 44  | 70  | 13 (100%)                              | 0 (0%) | 15.4 | 15.62 | 15   | 20     | 23   | -32 | 32  |
| NBMI300mg (n=11) | Screening        | 11 (100%) | 0 (0%) | 48.8 | 14.21 | 42   | 43     | 48   | 41  | 90  |                                        |        |      |       |      |        |      |     |     |
|                  | Follow-up day 15 | 11 (100%) | 0 (0%) | 56.1 | 7.19  | 53   | 56     | 61   | 40  | 68  | 11 (100%)                              | 0 (0%) | 7.3  | 16.68 | 8    | 13     | 16   | -40 | 20  |
|                  | Follow-up day 45 | 11 (100%) | 0 (0%) | 60.2 | 9.69  | 52   | 58     | 67   | 46  | 77  | 11 (100%)                              | 0 (0%) | 11.4 | 17.24 | 7    | 14     | 22   | -34 | 32  |
| Placebo (n=12)   | Screening        | 12 (100%) | 0 (0%) | 44.4 | 5.7   | 40.5 | 43.5   | 47.5 | 37  | 58  |                                        |        |      |       |      |        |      |     |     |
|                  | Follow-up day 15 | 12 (100%) | 0 (0%) | 58.9 | 9.2   | 51   | 59     | 67   | 45  | 73  | 12 (100%)                              | 0 (0%) | 14.5 | 7.65  | 7    | 13     | 20.5 | 6   | 28  |
|                  | Follow-up day 45 | 12 (100%) | 0 (0%) | 61.7 | 5.76  | 56.5 | 61     | 66.5 | 53  | 70  | 12 (100%)                              | 0 (0%) | 17.3 | 7.79  | 12.5 | 17     | 24   | 4   | 29  |

Executed script: \\SDS-SERVER2\SAS\$\SDS3\Projects\STATISTICS DRUG DEV\NBMI4011 - CTI002\Analyser\Script\SAS\T\_ms001.sas, on: 23MAY2016:14:00, by: maria.lidsell  
Version of source data: nbmi\_ma2.sas7bdat, last modified: 24FEB16:23:13, status: Final

Table DE2.1.1 Categorical summary of change from baseline of Mercury intoxication medical score sum - Item 1. Excessive salivation (Full analysis set)

| Treatment        | Visit            | Result*   |             |             | Change** from baseline (Screening visit) |            |             |   |
|------------------|------------------|-----------|-------------|-------------|------------------------------------------|------------|-------------|---|
|                  |                  | n         | 0           | 1           | n                                        | -1         | 0           | 1 |
| Total (n=36)     | Screening        | 36 (100%) | 24 (66.67%) | 12 (33.33%) |                                          |            |             |   |
|                  | Follow-up day 15 | 36 (100%) | 30 (83.33%) | 6 (16.67%)  | 36 (100%)                                | 6 (16.67%) | 30 (83.33%) |   |
|                  | Follow-up day 45 | 36 (100%) | 31 (86.11%) | 5 (13.89%)  | 36 (100%)                                | 7 (19.44%) | 29 (80.56%) |   |
| NBMI100mg (n=13) | Screening        | 13 (100%) | 8 (61.54%)  | 5 (38.46%)  |                                          |            |             |   |
|                  | Follow-up day 15 | 13 (100%) | 10 (76.92%) | 3 (23.08%)  | 13 (100%)                                | 2 (15.38%) | 11 (84.62%) |   |
|                  | Follow-up day 45 | 13 (100%) | 11 (84.62%) | 2 (15.38%)  | 13 (100%)                                | 3 (23.08%) | 10 (76.92%) |   |
| NBMI300mg (n=11) | Screening        | 11 (100%) | 4 (36.36%)  | 7 (63.64%)  |                                          |            |             |   |
|                  | Follow-up day 15 | 11 (100%) | 8 (72.73%)  | 3 (27.27%)  | 11 (100%)                                | 4 (36.36%) | 7 (63.64%)  |   |
|                  | Follow-up day 45 | 11 (100%) | 8 (72.73%)  | 3 (27.27%)  | 11 (100%)                                | 4 (36.36%) | 7 (63.64%)  |   |
| Placebo (n=12)   | Screening        | 12 (100%) | 12 (100%)   |             |                                          |            |             |   |
|                  | Follow-up day 15 | 12 (100%) | 12 (100%)   |             | 12 (100%)                                |            | 12 (100%)   |   |
|                  | Follow-up day 45 | 12 (100%) | 12 (100%)   |             | 12 (100%)                                |            | 12 (100%)   |   |

Executed script: \\SDS-SERVER2\SAS\$\SDS3\Projects\STATISTICS DRUG DEV\NBMI4011 - CTI002\Analyser\Script\SAS\T\_ms002.sas, on: 23MAY2016:14:00, by: maria.lidsell

Version of source data: nbmi\_ma2.sas7bdat, last modified: 24FEB16:23:13, status: Final

\*) Scores are 0 or 1, where 1 contributes to the Medical Score Sum.

\*\*) Change can be interpreted as -1=better, 0=unchanged, 1=worse.

Table DE2.2.1 Categorical summary of change from baseline of Mercury intoxication medical score sum - Item 2. Tremor at work (Full analysis set)

| Treatment        | Visit            | Result*   |             |            | Change** from baseline (Screening visit) |            |             |   |
|------------------|------------------|-----------|-------------|------------|------------------------------------------|------------|-------------|---|
|                  |                  | n         | 0           | 1          | n                                        | -1         | 0           | 1 |
| Total (n=36)     | Screening        | 36 (100%) | 31 (86.11%) | 5 (13.89%) |                                          |            |             |   |
|                  | Follow-up day 15 | 36 (100%) | 35 (97.22%) | 1 (2.78%)  | 36 (100%)                                | 4 (11.11%) | 32 (88.89%) |   |
|                  | Follow-up day 45 | 36 (100%) | 34 (94.44%) | 2 (5.56%)  | 36 (100%)                                | 3 (8.33%)  | 33 (91.67%) |   |
| NBMI100mg (n=13) | Screening        | 13 (100%) | 11 (84.62%) | 2 (15.38%) |                                          |            |             |   |
|                  | Follow-up day 15 | 13 (100%) | 12 (92.31%) | 1 (7.69%)  | 13 (100%)                                | 1 (7.69%)  | 12 (92.31%) |   |
|                  | Follow-up day 45 | 13 (100%) | 12 (92.31%) | 1 (7.69%)  | 13 (100%)                                | 1 (7.69%)  | 12 (92.31%) |   |
| NBMI300mg (n=11) | Screening        | 11 (100%) | 8 (72.73%)  | 3 (27.27%) |                                          |            |             |   |
|                  | Follow-up day 15 | 11 (100%) | 11 (100%)   |            | 11 (100%)                                | 3 (27.27%) | 8 (72.73%)  |   |
|                  | Follow-up day 45 | 11 (100%) | 10 (90.91%) | 1 (9.09%)  | 11 (100%)                                | 2 (18.18%) | 9 (81.82%)  |   |
| Placebo (n=12)   | Screening        | 12 (100%) | 12 (100%)   |            |                                          |            |             |   |
|                  | Follow-up day 15 | 12 (100%) | 12 (100%)   |            | 12 (100%)                                |            | 12 (100%)   |   |
|                  | Follow-up day 45 | 12 (100%) | 12 (100%)   |            | 12 (100%)                                |            | 12 (100%)   |   |

Executed script: \\SDS-SERVER2\SAS\$\SDS3\Projects\STATISTICS DRUG DEV\NBMI4011 - CTI002\Analyser\Script\SAS\T\_ms002.sas, on: 23MAY2016:14:00, by: maria.lidsell

Version of source data: nbmi\_ma2.sas7bdat, last modified: 24FEB16:23:13, status: Final

\*) Scores are 0 or 1, where 1 contributes to the Medical Score Sum.

\*\*) Change can be interpreted as -1=better, 0=unchanged, 1=worse.

Table DE2.3.1 Categorical summary of change from baseline of Mercury intoxication medical score sum - Item 3. Sleeping problems at night (Full analysis set)

| Treatment        | Visit            | Result*   |             |             | Change** from baseline (Screening visit) |             |             |   |
|------------------|------------------|-----------|-------------|-------------|------------------------------------------|-------------|-------------|---|
|                  |                  | n         | 0           | 1           | n                                        | -1          | 0           | 1 |
| Total (n=36)     | Screening        | 36 (100%) | 3 (8.33%)   | 33 (91.67%) |                                          |             |             |   |
|                  | Follow-up day 15 | 36 (100%) | 25 (69.44%) | 11 (30.56%) | 36 (100%)                                | 22 (61.11%) | 14 (38.89%) |   |
|                  | Follow-up day 45 | 36 (100%) | 27 (75%)    | 9 (25%)     | 36 (100%)                                | 24 (66.67%) | 12 (33.33%) |   |
| NBMI100mg (n=13) | Screening        | 13 (100%) |             | 13 (100%)   |                                          |             |             |   |
|                  | Follow-up day 15 | 13 (100%) | 10 (76.92%) | 3 (23.08%)  | 13 (100%)                                | 10 (76.92%) | 3 (23.08%)  |   |
|                  | Follow-up day 45 | 13 (100%) | 8 (61.54%)  | 5 (38.46%)  | 13 (100%)                                | 8 (61.54%)  | 5 (38.46%)  |   |
| NBMI300mg (n=11) | Screening        | 11 (100%) | 2 (18.18%)  | 9 (81.82%)  |                                          |             |             |   |
|                  | Follow-up day 15 | 11 (100%) | 9 (81.82%)  | 2 (18.18%)  | 11 (100%)                                | 7 (63.64%)  | 4 (36.36%)  |   |
|                  | Follow-up day 45 | 11 (100%) | 9 (81.82%)  | 2 (18.18%)  | 11 (100%)                                | 7 (63.64%)  | 4 (36.36%)  |   |
| Placebo (n=12)   | Screening        | 12 (100%) | 1 (8.33%)   | 11 (91.67%) |                                          |             |             |   |
|                  | Follow-up day 15 | 12 (100%) | 6 (50%)     | 6 (50%)     | 12 (100%)                                | 5 (41.67%)  | 7 (58.33%)  |   |
|                  | Follow-up day 45 | 12 (100%) | 10 (83.33%) | 2 (16.67%)  | 12 (100%)                                | 9 (75%)     | 3 (25%)     |   |

Executed script: \\SDS-SERVER2\SAS\$\SDS3\Projects\STATISTICS DRUG DEV\NBMI4011 - CTI002\Analyser\Script\SAS\T\_ms002.sas, on: 23MAY2016:14:00, by: maria.lidsell

Version of source data: nbmi\_ma2.sas7bdat, last modified: 24FEB16:23:13, status: Final

\*) Scores are 0 or 1, where 1 contributes to the Medical Score Sum.

\*\*\*) Change can be interpreted as -1=better, 0=unchanged, 1=worse.

Table DE2.4.1 Categorical summary of change from baseline of Mercury intoxication medical score sum - Item 4. Bluish discoloration of gingiva (Full analysis set)

| Treatment        | Visit            | Result*   |             |             | Change** from baseline (Screening visit) |           |             |   |
|------------------|------------------|-----------|-------------|-------------|------------------------------------------|-----------|-------------|---|
|                  |                  | n         | 0           | 1           | n                                        | -1        | 0           | 1 |
| Total (n=36)     | Screening        | 36 (100%) | 24 (66.67%) | 12 (33.33%) |                                          |           |             |   |
|                  | Follow-up day 15 | 36 (100%) | 26 (72.22%) | 10 (27.78%) | 36 (100%)                                | 2 (5.56%) | 34 (94.44%) |   |
|                  | Follow-up day 45 | 36 (100%) | 24 (66.67%) | 12 (33.33%) | 36 (100%)                                |           | 36 (100%)   |   |
| NBMI100mg (n=13) | Screening        | 13 (100%) | 7 (53.85%)  | 6 (46.15%)  |                                          |           |             |   |
|                  | Follow-up day 15 | 13 (100%) | 8 (61.54%)  | 5 (38.46%)  | 13 (100%)                                | 1 (7.69%) | 12 (92.31%) |   |
|                  | Follow-up day 45 | 13 (100%) | 7 (53.85%)  | 6 (46.15%)  | 13 (100%)                                |           | 13 (100%)   |   |
| NBMI300mg (n=11) | Screening        | 11 (100%) | 7 (63.64%)  | 4 (36.36%)  |                                          |           |             |   |
|                  | Follow-up day 15 | 11 (100%) | 7 (63.64%)  | 4 (36.36%)  | 11 (100%)                                |           | 11 (100%)   |   |
|                  | Follow-up day 45 | 11 (100%) | 7 (63.64%)  | 4 (36.36%)  | 11 (100%)                                |           | 11 (100%)   |   |
| Placebo (n=12)   | Screening        | 12 (100%) | 10 (83.33%) | 2 (16.67%)  |                                          |           |             |   |
|                  | Follow-up day 15 | 12 (100%) | 11 (91.67%) | 1 (8.33%)   | 12 (100%)                                | 1 (8.33%) | 11 (91.67%) |   |
|                  | Follow-up day 45 | 12 (100%) | 10 (83.33%) | 2 (16.67%)  | 12 (100%)                                |           | 12 (100%)   |   |

Executed script: \\SDS-SERVER2\SAS\$\SDS3\Projects\STATISTICS DRUG DEV\NBMI4011 - CTI002\Analyser\Script\SAS\T\_ms002.sas, on: 23MAY2016:14:00, by: maria.lidsell

Version of source data: nbmi\_ma2.sas7bdat, last modified: 24FEB16:23:13, status: Final

\*) Scores are 0 or 1, where 1 contributes to the Medical Score Sum.

\*\*) Change can be interpreted as -1=better, 0=unchanged, 1=worse.



Table DE2.5.1 Categorical summary of change from baseline of Mercury intoxication medical score sum - Item 5. Ataxia of gait (Full analysis set)

| Treatment        | Visit            | Result*   |             |             | Change** from baseline (Screening visit) |            |             |            |
|------------------|------------------|-----------|-------------|-------------|------------------------------------------|------------|-------------|------------|
|                  |                  | n         | 0           | 1           | n                                        | -1         | 0           | 1          |
| Total (n=36)     | Screening        | 36 (100%) | 10 (27.78%) | 26 (72.22%) |                                          |            |             |            |
|                  | Follow-up day 15 | 36 (100%) | 11 (30.56%) | 25 (69.44%) | 36 (100%)                                | 4 (11.11%) | 29 (80.56%) | 3 (8.33%)  |
|                  | Follow-up day 45 | 36 (100%) | 14 (38.89%) | 22 (61.11%) | 36 (100%)                                | 8 (22.22%) | 24 (66.67%) | 4 (11.11%) |
| NBMI100mg (n=13) | Screening        | 13 (100%) | 4 (30.77%)  | 9 (69.23%)  |                                          |            |             |            |
|                  | Follow-up day 15 | 13 (100%) | 2 (15.38%)  | 11 (84.62%) | 13 (100%)                                |            | 11 (84.62%) | 2 (15.38%) |
|                  | Follow-up day 45 | 13 (100%) | 4 (30.77%)  | 9 (69.23%)  | 13 (100%)                                | 1 (7.69%)  | 11 (84.62%) | 1 (7.69%)  |
| NBMI300mg (n=11) | Screening        | 11 (100%) | 3 (27.27%)  | 8 (72.73%)  |                                          |            |             |            |
|                  | Follow-up day 15 | 11 (100%) | 4 (36.36%)  | 7 (63.64%)  | 11 (100%)                                | 2 (18.18%) | 8 (72.73%)  | 1 (9.09%)  |
|                  | Follow-up day 45 | 11 (100%) | 4 (36.36%)  | 7 (63.64%)  | 11 (100%)                                | 3 (27.27%) | 6 (54.55%)  | 2 (18.18%) |
| Placebo (n=12)   | Screening        | 12 (100%) | 3 (25%)     | 9 (75%)     |                                          |            |             |            |
|                  | Follow-up day 15 | 12 (100%) | 5 (41.67%)  | 7 (58.33%)  | 12 (100%)                                | 2 (16.67%) | 10 (83.33%) |            |
|                  | Follow-up day 45 | 12 (100%) | 6 (50%)     | 6 (50%)     | 12 (100%)                                | 4 (33.33%) | 7 (58.33%)  | 1 (8.33%)  |

Executed script: \\SDS-SERVER2\SAS\$\SDS3\Projects\STATISTICS DRUG DEV\NBMI4011 - CTI002\Analyser\Script\SAS\T\_ms002.sas, on: 23MAY2016:14:00, by: maria.lidsell

Version of source data: nbmi\_ma2.sas7bdat, last modified: 24FEB16:23:13, status: Final

\*) Scores are 0 or 1, where 1 contributes to the Medical Score Sum.

\*\*) Change can be interpreted as -1=better, 0=unchanged, 1=worse.

Table DE2.6.1 Categorical summary of change from baseline of Mercury intoxication medical score sum - Item 6. Dysdiadochokinesia (Full analysis set)

| Treatment        | Visit            | Result*   |            |             | Change** from baseline (Screening visit) |            |             |            |
|------------------|------------------|-----------|------------|-------------|------------------------------------------|------------|-------------|------------|
|                  |                  | n         | 0          | 1           | n                                        | -1         | 0           | 1          |
| Total (n=36)     | Screening        | 36 (100%) | 4 (11.11%) | 32 (88.89%) |                                          |            |             |            |
|                  | Follow-up day 15 | 36 (100%) | 9 (25%)    | 27 (75%)    | 36 (100%)                                | 7 (19.44%) | 27 (75%)    | 2 (5.56%)  |
|                  | Follow-up day 45 | 36 (100%) | 8 (22.22%) | 28 (77.78%) | 36 (100%)                                | 7 (19.44%) | 26 (72.22%) | 3 (8.33%)  |
| NBMI100mg (n=13) | Screening        | 13 (100%) | 1 (7.69%)  | 12 (92.31%) |                                          |            |             |            |
|                  | Follow-up day 15 | 13 (100%) | 2 (15.38%) | 11 (84.62%) | 13 (100%)                                | 2 (15.38%) | 10 (76.92%) | 1 (7.69%)  |
|                  | Follow-up day 45 | 13 (100%) | 1 (7.69%)  | 12 (92.31%) | 13 (100%)                                | 1 (7.69%)  | 11 (84.62%) | 1 (7.69%)  |
| NBMI300mg (n=11) | Screening        | 11 (100%) | 2 (18.18%) | 9 (81.82%)  |                                          |            |             |            |
|                  | Follow-up day 15 | 11 (100%) | 4 (36.36%) | 7 (63.64%)  | 11 (100%)                                | 3 (27.27%) | 7 (63.64%)  | 1 (9.09%)  |
|                  | Follow-up day 45 | 11 (100%) | 3 (27.27%) | 8 (72.73%)  | 11 (100%)                                | 3 (27.27%) | 6 (54.55%)  | 2 (18.18%) |
| Placebo (n=12)   | Screening        | 12 (100%) | 1 (8.33%)  | 11 (91.67%) |                                          |            |             |            |
|                  | Follow-up day 15 | 12 (100%) | 3 (25%)    | 9 (75%)     | 12 (100%)                                | 2 (16.67%) | 10 (83.33%) |            |
|                  | Follow-up day 45 | 12 (100%) | 4 (33.33%) | 8 (66.67%)  | 12 (100%)                                | 3 (25%)    | 9 (75%)     |            |

Executed script: \\SDS-SERVER2\SAS\$\SDS3\Projects\STATISTICS DRUG DEV\NBMI4011 - CTI002\Analyser\Script\SAS\T\_ms002.sas, on: 23MAY2016:14:00, by: maria.lidsell

Version of source data: nbmi\_ma2.sas7bdat, last modified: 24FEB16:23:13, status: Final

\*) Scores are 0 or 1, where 1 contributes to the Medical Score Sum.

\*\*) Change can be interpreted as -1=better, 0=unchanged, 1=worse.

Table DE2.7.1 Categorical summary of change from baseline of Mercury intoxication medical score sum - Item 7. Heel-to-chin test (Full analysis set)

| Treatment        | Visit            | Result*   |             |             | Change** from baseline (Screening visit) |             |             |           |
|------------------|------------------|-----------|-------------|-------------|------------------------------------------|-------------|-------------|-----------|
|                  |                  | n         | 0           | 1           | n                                        | -1          | 0           | 1         |
| Total (n=36)     | Screening        | 36 (100%) | 4 (11.11%)  | 32 (88.89%) |                                          |             |             |           |
|                  | Follow-up day 15 | 36 (100%) | 15 (41.67%) | 21 (58.33%) | 36 (100%)                                | 11 (30.56%) | 25 (69.44%) |           |
|                  | Follow-up day 45 | 36 (100%) | 19 (52.78%) | 17 (47.22%) | 36 (100%)                                | 16 (44.44%) | 19 (52.78%) | 1 (2.78%) |
| NBMI100mg (n=13) | Screening        | 13 (100%) | 1 (7.69%)   | 12 (92.31%) |                                          |             |             |           |
|                  | Follow-up day 15 | 13 (100%) | 3 (23.08%)  | 10 (76.92%) | 13 (100%)                                | 2 (15.38%)  | 11 (84.62%) |           |
|                  | Follow-up day 45 | 13 (100%) | 5 (38.46%)  | 8 (61.54%)  | 13 (100%)                                | 5 (38.46%)  | 7 (53.85%)  | 1 (7.69%) |
| NBMI300mg (n=11) | Screening        | 11 (100%) | 2 (18.18%)  | 9 (81.82%)  |                                          |             |             |           |
|                  | Follow-up day 15 | 11 (100%) | 6 (54.55%)  | 5 (45.45%)  | 11 (100%)                                | 4 (36.36%)  | 7 (63.64%)  |           |
|                  | Follow-up day 45 | 11 (100%) | 8 (72.73%)  | 3 (27.27%)  | 11 (100%)                                | 6 (54.55%)  | 5 (45.45%)  |           |
| Placebo (n=12)   | Screening        | 12 (100%) | 1 (8.33%)   | 11 (91.67%) |                                          |             |             |           |
|                  | Follow-up day 15 | 12 (100%) | 6 (50%)     | 6 (50%)     | 12 (100%)                                | 5 (41.67%)  | 7 (58.33%)  |           |
|                  | Follow-up day 45 | 12 (100%) | 6 (50%)     | 6 (50%)     | 12 (100%)                                | 5 (41.67%)  | 7 (58.33%)  |           |

Executed script: \\SDS-SERVER2\SAS\$\SDS3\Projects\STATISTICS DRUG DEV\NBMI4011 - CTI002\Analyser\Script\SAS\T\_ms002.sas, on: 23MAY2016:14:00, by: maria.lidsell

Version of source data: nbmi\_ma2.sas7bdat, last modified: 24FEB16:23:13, status: Final

\*) Scores are 0 or 1, where 1 contributes to the Medical Score Sum.

\*\*) Change can be interpreted as -1=better, 0=unchanged, 1=worse.

Table DE2.8.1 Categorical summary of change from baseline of Mercury intoxication medical score sum - Item 8. Proteinuria (Full analysis set)

| Treatment        | Visit            | Result*   |             |           | Change** from baseline (Screening visit) |           |             |   |
|------------------|------------------|-----------|-------------|-----------|------------------------------------------|-----------|-------------|---|
|                  |                  | n         | 0           | 1         | n                                        | -1        | 0           | 1 |
| Total (n=36)     | Screening        | 36 (100%) | 35 (97.22%) | 1 (2.78%) |                                          |           |             |   |
|                  | Follow-up day 15 | 36 (100%) | 36 (100%)   |           | 36 (100%)                                | 1 (2.78%) | 35 (97.22%) |   |
|                  | Follow-up day 45 | 36 (100%) | 36 (100%)   |           | 36 (100%)                                | 1 (2.78%) | 35 (97.22%) |   |
| NBMI100mg (n=13) | Screening        | 13 (100%) | 13 (100%)   |           |                                          |           |             |   |
|                  | Follow-up day 15 | 13 (100%) | 13 (100%)   |           | 13 (100%)                                |           | 13 (100%)   |   |
|                  | Follow-up day 45 | 13 (100%) | 13 (100%)   |           | 13 (100%)                                |           | 13 (100%)   |   |
| NBMI300mg (n=11) | Screening        | 11 (100%) | 10 (90.91%) | 1 (9.09%) |                                          |           |             |   |
|                  | Follow-up day 15 | 11 (100%) | 11 (100%)   |           | 11 (100%)                                | 1 (9.09%) | 10 (90.91%) |   |
|                  | Follow-up day 45 | 11 (100%) | 11 (100%)   |           | 11 (100%)                                | 1 (9.09%) | 10 (90.91%) |   |
| Placebo (n=12)   | Screening        | 12 (100%) | 12 (100%)   |           |                                          |           |             |   |
|                  | Follow-up day 15 | 12 (100%) | 12 (100%)   |           | 12 (100%)                                |           | 12 (100%)   |   |
|                  | Follow-up day 45 | 12 (100%) | 12 (100%)   |           | 12 (100%)                                |           | 12 (100%)   |   |

Executed script: \\SDS-SERVER2\SAS\$\SDS3\Projects\STATISTICS DRUG DEV\NBMI4011 - CTI002\Analyser\Script\SAS\T\_ms002.sas, on: 23MAY2016:14:00, by: maria.lidsell

Version of source data: nbmi\_ma2.sas7bdat, last modified: 24FEB16:23:13, status: Final

\*) Scores are 0 or 1, where 1 contributes to the Medical Score Sum.

\*\*) Change can be interpreted as -1=better, 0=unchanged, 1=worse.

Table DE2.9.1 Categorical summary of change from baseline of Mercury intoxication medical score sum - Item 9. Match box test (Full analysis set)

| Treatment        | Visit            | Result*   |             |             | Change** from baseline (Screening visit) |             |             |           |
|------------------|------------------|-----------|-------------|-------------|------------------------------------------|-------------|-------------|-----------|
|                  |                  | n         | 0           | 1           | n                                        | -1          | 0           | 1         |
| Total (n=36)     | Screening        | 36 (100%) | 3 (8.33%)   | 33 (91.67%) |                                          |             |             |           |
|                  | Follow-up day 15 | 36 (100%) | 22 (61.11%) | 14 (38.89%) | 36 (100%)                                | 19 (52.78%) | 17 (47.22%) |           |
|                  | Follow-up day 45 | 36 (100%) | 23 (63.89%) | 13 (36.11%) | 36 (100%)                                | 21 (58.33%) | 14 (38.89%) | 1 (2.78%) |
| NBMI100mg (n=13) | Screening        | 13 (100%) | 1 (7.69%)   | 12 (92.31%) |                                          |             |             |           |
|                  | Follow-up day 15 | 13 (100%) | 6 (46.15%)  | 7 (53.85%)  | 13 (100%)                                | 5 (38.46%)  | 8 (61.54%)  |           |
|                  | Follow-up day 45 | 13 (100%) | 9 (69.23%)  | 4 (30.77%)  | 13 (100%)                                | 8 (61.54%)  | 5 (38.46%)  |           |
| NBMI300mg (n=11) | Screening        | 11 (100%) | 1 (9.09%)   | 10 (90.91%) |                                          |             |             |           |
|                  | Follow-up day 15 | 11 (100%) | 7 (63.64%)  | 4 (36.36%)  | 11 (100%)                                | 6 (54.55%)  | 5 (45.45%)  |           |
|                  | Follow-up day 45 | 11 (100%) | 6 (54.55%)  | 5 (45.45%)  | 11 (100%)                                | 5 (45.45%)  | 6 (54.55%)  |           |
| Placebo (n=12)   | Screening        | 12 (100%) | 1 (8.33%)   | 11 (91.67%) |                                          |             |             |           |
|                  | Follow-up day 15 | 12 (100%) | 9 (75%)     | 3 (25%)     | 12 (100%)                                | 8 (66.67%)  | 4 (33.33%)  |           |
|                  | Follow-up day 45 | 12 (100%) | 8 (66.67%)  | 4 (33.33%)  | 12 (100%)                                | 8 (66.67%)  | 3 (25%)     | 1 (8.33%) |

Executed script: \\SDS-SERVER2\SAS\$\SDS3\Projects\STATISTICS DRUG DEV\NBMI4011 - CTI002\Analyser\Script\SAS\T\_ms002.sas, on: 23MAY2016:14:00, by: maria.lidsell

Version of source data: nbmi\_ma2.sas7bdat, last modified: 24FEB16:23:13, status: Final

\*) Scores are 0 or 1, where 1 contributes to the Medical Score Sum.

\*\*) Change can be interpreted as -1=better, 0=unchanged, 1=worse.

Table DE2.10.1 Categorical summary of change from baseline of Mercury intoxication medical score sum - Item 10. Pencil tapping test (Full analysis set)

| Treatment        | Visit            | Result*   |             |             | Change** from baseline (Screening visit) |             |             |   |
|------------------|------------------|-----------|-------------|-------------|------------------------------------------|-------------|-------------|---|
|                  |                  | n         | 0           | 1           | n                                        | -1          | 0           | 1 |
| Total (n=36)     | Screening        | 36 (100%) | 9 (25%)     | 27 (75%)    |                                          |             |             |   |
|                  | Follow-up day 15 | 36 (100%) | 33 (91.67%) | 3 (8.33%)   | 36 (100%)                                | 24 (66.67%) | 12 (33.33%) |   |
|                  | Follow-up day 45 | 36 (100%) | 35 (97.22%) | 1 (2.78%)   | 36 (100%)                                | 26 (72.22%) | 10 (27.78%) |   |
| NBMI100mg (n=13) | Screening        | 13 (100%) | 2 (15.38%)  | 11 (84.62%) |                                          |             |             |   |
|                  | Follow-up day 15 | 13 (100%) | 12 (92.31%) | 1 (7.69%)   | 13 (100%)                                | 10 (76.92%) | 3 (23.08%)  |   |
|                  | Follow-up day 45 | 13 (100%) | 12 (92.31%) | 1 (7.69%)   | 13 (100%)                                | 10 (76.92%) | 3 (23.08%)  |   |
| NBMI300mg (n=11) | Screening        | 11 (100%) | 3 (27.27%)  | 8 (72.73%)  |                                          |             |             |   |
|                  | Follow-up day 15 | 11 (100%) | 10 (90.91%) | 1 (9.09%)   | 11 (100%)                                | 7 (63.64%)  | 4 (36.36%)  |   |
|                  | Follow-up day 45 | 11 (100%) | 11 (100%)   |             | 11 (100%)                                | 8 (72.73%)  | 3 (27.27%)  |   |
| Placebo (n=12)   | Screening        | 12 (100%) | 4 (33.33%)  | 8 (66.67%)  |                                          |             |             |   |
|                  | Follow-up day 15 | 12 (100%) | 11 (91.67%) | 1 (8.33%)   | 12 (100%)                                | 7 (58.33%)  | 5 (41.67%)  |   |
|                  | Follow-up day 45 | 12 (100%) | 12 (100%)   |             | 12 (100%)                                | 8 (66.67%)  | 4 (33.33%)  |   |

Executed script: \\SDS-SERVER2\SAS\$\SDS3\Projects\STATISTICS DRUG DEV\NBMI4011 - CTI002\Analyser\Script\SAS\T\_ms002.sas, on: 23MAY2016:14:00, by: maria.lidsell

Version of source data: nbmi\_ma2.sas7bdat, last modified: 24FEB16:23:13, status: Final

\*) Scores are 0 or 1, where 1 contributes to the Medical Score Sum.

\*\*\*) Change can be interpreted as -1=better, 0=unchanged, 1=worse.

Table DE3.1.1 Shift table of baseline vs. Post baseline of Mercury intoxication medical score sum - Item 1.  
Excessive salivation (Full analysis set)

| Visit            | Treatment        | Baseline score*<br>(Screening visit) | Post baseline score* |            |             |
|------------------|------------------|--------------------------------------|----------------------|------------|-------------|
|                  |                  |                                      | 0                    | 1          | Total       |
| Follow-up day 15 | Total (n=36)     | 0                                    | 24 (100%)            |            | 24 (66.67%) |
|                  |                  | 1                                    | 6 (50%)              | 6 (50%)    | 12 (33.33%) |
|                  |                  | Total                                | 30 (83.33%)          | 6 (16.67%) | 36 (100%)   |
|                  | NBMI100mg (n=13) | 0                                    | 8 (100%)             |            | 8 (61.54%)  |
|                  |                  | 1                                    | 2 (40%)              | 3 (60%)    | 5 (38.46%)  |
|                  |                  | Total                                | 10 (76.92%)          | 3 (23.08%) | 13 (100%)   |
|                  | NBMI300mg (n=11) | 0                                    | 4 (100%)             |            | 4 (36.36%)  |
|                  |                  | 1                                    | 4 (57.14%)           | 3 (42.86%) | 7 (63.64%)  |
|                  |                  | Total                                | 8 (72.73%)           | 3 (27.27%) | 11 (100%)   |
|                  | Placebo (n=12)   | 0                                    | 12 (100%)            |            | 12 (100%)   |
|                  |                  | Total                                | 12 (100%)            |            | 12 (100%)   |
|                  | Follow-up day 45 | Total (n=36)                         | 0                    | 24 (100%)  |             |
| 1                |                  |                                      | 7 (58.33%)           | 5 (41.67%) | 12 (33.33%) |
| Total            |                  |                                      | 31 (86.11%)          | 5 (13.89%) | 36 (100%)   |
| NBMI100mg (n=13) |                  | 0                                    | 8 (100%)             |            | 8 (61.54%)  |
|                  |                  | 1                                    | 3 (60%)              | 2 (40%)    | 5 (38.46%)  |
|                  |                  | Total                                | 11 (84.62%)          | 2 (15.38%) | 13 (100%)   |
| NBMI300mg (n=11) |                  | 0                                    | 4 (100%)             |            | 4 (36.36%)  |
|                  |                  | 1                                    | 4 (57.14%)           | 3 (42.86%) | 7 (63.64%)  |
|                  |                  | Total                                | 8 (72.73%)           | 3 (27.27%) | 11 (100%)   |
| Placebo (n=12)   |                  | 0                                    | 12 (100%)            |            | 12 (100%)   |
|                  |                  | Total                                | 12 (100%)            |            | 12 (100%)   |

Executed script: \\SDS-SERVER2\SAS\$\SDS3\Projects\STATISTICS DRUG DEV\NBMI4011 - CTI002\Analyser\Script\SAS\T\_ms003.sas, on: 23MAY2016:14:00, by: maria.lidsell

Version of source data: nbmi\_ma2.sas7bdat, last modified: 24FEB16:23:13, status: Final

\*) Scores are 0 or 1, where 1 contributes to the Medical Score Sum.

Table DE3.2.1 Shift table of baseline vs. Post baseline of Mercury intoxication medical score sum - Item 2. Tremor at work (Full analysis set)

| Visit            | Treatment        | Baseline score*<br>(Screening visit) | Post baseline score* |            |             |
|------------------|------------------|--------------------------------------|----------------------|------------|-------------|
|                  |                  |                                      | 0                    | 1          | Total       |
| Follow-up day 15 | Total (n=36)     | 0                                    | 31 (100%)            |            | 31 (86.11%) |
|                  |                  | 1                                    | 4 (80%)              | 1 (20%)    | 5 (13.89%)  |
|                  |                  | Total                                | 35 (97.22%)          | 1 (2.78%)  | 36 (100%)   |
|                  | NBMI100mg (n=13) | 0                                    | 11 (100%)            |            | 11 (84.62%) |
|                  |                  | 1                                    | 1 (50%)              | 1 (50%)    | 2 (15.38%)  |
|                  |                  | Total                                | 12 (92.31%)          | 1 (7.69%)  | 13 (100%)   |
|                  | NBMI300mg (n=11) | 0                                    | 8 (100%)             |            | 8 (72.73%)  |
|                  |                  | 1                                    | 3 (100%)             |            | 3 (27.27%)  |
|                  |                  | Total                                | 11 (100%)            |            | 11 (100%)   |
|                  | Placebo (n=12)   | 0                                    | 12 (100%)            |            | 12 (100%)   |
|                  |                  | Total                                | 12 (100%)            |            | 12 (100%)   |
|                  | Follow-up day 45 | Total (n=36)                         | 0                    | 31 (100%)  |             |
| 1                |                  |                                      | 3 (60%)              | 2 (40%)    | 5 (13.89%)  |
| Total            |                  |                                      | 34 (94.44%)          | 2 (5.56%)  | 36 (100%)   |
| NBMI100mg (n=13) |                  | 0                                    | 11 (100%)            |            | 11 (84.62%) |
|                  |                  | 1                                    | 1 (50%)              | 1 (50%)    | 2 (15.38%)  |
|                  |                  | Total                                | 12 (92.31%)          | 1 (7.69%)  | 13 (100%)   |
| NBMI300mg (n=11) |                  | 0                                    | 8 (100%)             |            | 8 (72.73%)  |
|                  |                  | 1                                    | 2 (66.67%)           | 1 (33.33%) | 3 (27.27%)  |
|                  |                  | Total                                | 10 (90.91%)          | 1 (9.09%)  | 11 (100%)   |
| Placebo (n=12)   |                  | 0                                    | 12 (100%)            |            | 12 (100%)   |
|                  |                  | Total                                | 12 (100%)            |            | 12 (100%)   |

Executed script: \\SDS-SERVER2\SAS\$\SDS3\Projects\STATISTICS DRUG DEV\NBMI4011 - CTI002\Analyser\Script\SAS\T\_ms003.sas, on: 23MAY2016:14:00, by: maria.lidsell

Version of source data: nbmi\_ma2.sas7bdat, last modified: 24FEB16:23:13, status: Final

\*) Scores are 0 or 1, where 1 contributes to the Medical Score Sum.



Table DE3.3.1 Shift table of baseline vs. Post baseline of Mercury intoxication medical score sum - Item 3. Sleeping problems at night (Full analysis set)

| Visit            | Treatment        | Baseline score*<br>(Screening visit) | Post baseline score* |             |             |
|------------------|------------------|--------------------------------------|----------------------|-------------|-------------|
|                  |                  |                                      | 0                    | 1           | Total       |
| Follow-up day 15 | Total (n=36)     | 0                                    | 3 (100%)             |             | 3 (8.33%)   |
|                  |                  | 1                                    | 22 (66.67%)          | 11 (33.33%) | 33 (91.67%) |
|                  |                  | Total                                | 25 (69.44%)          | 11 (30.56%) | 36 (100%)   |
|                  | NBMI100mg (n=13) | 1                                    | 10 (76.92%)          | 3 (23.08%)  | 13 (100%)   |
|                  |                  | Total                                | 10 (76.92%)          | 3 (23.08%)  | 13 (100%)   |
|                  | NBMI300mg (n=11) | 0                                    | 2 (100%)             |             | 2 (18.18%)  |
|                  |                  | 1                                    | 7 (77.78%)           | 2 (22.22%)  | 9 (81.82%)  |
|                  |                  | Total                                | 9 (81.82%)           | 2 (18.18%)  | 11 (100%)   |
|                  | Placebo (n=12)   | 0                                    | 1 (100%)             |             | 1 (8.33%)   |
|                  |                  | 1                                    | 5 (45.45%)           | 6 (54.55%)  | 11 (91.67%) |
|                  |                  | Total                                | 6 (50%)              | 6 (50%)     | 12 (100%)   |
|                  | Follow-up day 45 | Total (n=36)                         | 0                    | 3 (100%)    |             |
| 1                |                  |                                      | 24 (72.73%)          | 9 (27.27%)  | 33 (91.67%) |
| Total            |                  |                                      | 27 (75%)             | 9 (25%)     | 36 (100%)   |
| NBMI100mg (n=13) |                  | 1                                    | 8 (61.54%)           | 5 (38.46%)  | 13 (100%)   |
|                  |                  | Total                                | 8 (61.54%)           | 5 (38.46%)  | 13 (100%)   |
| NBMI300mg (n=11) |                  | 0                                    | 2 (100%)             |             | 2 (18.18%)  |
|                  |                  | 1                                    | 7 (77.78%)           | 2 (22.22%)  | 9 (81.82%)  |
|                  |                  | Total                                | 9 (81.82%)           | 2 (18.18%)  | 11 (100%)   |
| Placebo (n=12)   |                  | 0                                    | 1 (100%)             |             | 1 (8.33%)   |
|                  |                  | 1                                    | 9 (81.82%)           | 2 (18.18%)  | 11 (91.67%) |
|                  |                  | Total                                | 10 (83.33%)          | 2 (16.67%)  | 12 (100%)   |

Executed script: \\SDS-SERVER2\SAS\$\SDS3\Projects\STATISTICS DRUG DEV\NBMI4011 - CTI002\Analyser\Script\SAS\T\_ms003.sas, on: 23MAY2016:14:00, by: maria.lidsell

Version of source data: nbmi\_ma2.sas7bdat, last modified: 24FEB16:23:13, status: Final

\*) Scores are 0 or 1, where 1 contributes to the Medical Score Sum.

Table DE3.4.1 Shift table of baseline vs. Post baseline of Mercury intoxication medical score sum - Item 4. Bluish discoloration of gingiva (Full analysis set)

| Visit            | Treatment        | Baseline score*<br>(Screening visit) | Post baseline score* |             |             |
|------------------|------------------|--------------------------------------|----------------------|-------------|-------------|
|                  |                  |                                      | 0                    | 1           | Total       |
| Follow-up day 15 | Total (n=36)     | 0                                    | 24 (100%)            |             | 24 (66.67%) |
|                  |                  | 1                                    | 2 (16.67%)           | 10 (83.33%) | 12 (33.33%) |
|                  |                  | Total                                | 26 (72.22%)          | 10 (27.78%) | 36 (100%)   |
|                  | NBMI100mg (n=13) | 0                                    | 7 (100%)             |             | 7 (53.85%)  |
|                  |                  | 1                                    | 1 (16.67%)           | 5 (83.33%)  | 6 (46.15%)  |
|                  |                  | Total                                | 8 (61.54%)           | 5 (38.46%)  | 13 (100%)   |
|                  | NBMI300mg (n=11) | 0                                    | 7 (100%)             |             | 7 (63.64%)  |
|                  |                  | 1                                    |                      | 4 (100%)    | 4 (36.36%)  |
|                  |                  | Total                                | 7 (63.64%)           | 4 (36.36%)  | 11 (100%)   |
|                  | Placebo (n=12)   | 0                                    | 10 (100%)            |             | 10 (83.33%) |
|                  |                  | 1                                    | 1 (50%)              | 1 (50%)     | 2 (16.67%)  |
|                  |                  | Total                                | 11 (91.67%)          | 1 (8.33%)   | 12 (100%)   |
| Follow-up day 45 | Total (n=36)     | 0                                    | 24 (100%)            |             | 24 (66.67%) |
|                  |                  | 1                                    |                      | 12 (100%)   | 12 (33.33%) |
|                  |                  | Total                                | 24 (66.67%)          | 12 (33.33%) | 36 (100%)   |
|                  | NBMI100mg (n=13) | 0                                    | 7 (100%)             |             | 7 (53.85%)  |
|                  |                  | 1                                    |                      | 6 (100%)    | 6 (46.15%)  |
|                  |                  | Total                                | 7 (53.85%)           | 6 (46.15%)  | 13 (100%)   |
|                  | NBMI300mg (n=11) | 0                                    | 7 (100%)             |             | 7 (63.64%)  |
|                  |                  | 1                                    |                      | 4 (100%)    | 4 (36.36%)  |
|                  |                  | Total                                | 7 (63.64%)           | 4 (36.36%)  | 11 (100%)   |
|                  | Placebo (n=12)   | 0                                    | 10 (100%)            |             | 10 (83.33%) |
|                  |                  | 1                                    |                      | 2 (100%)    | 2 (16.67%)  |
|                  |                  | Total                                | 10 (83.33%)          | 2 (16.67%)  | 12 (100%)   |

Executed script: \\SDS-SERVER2\SAS\$\SDS3\Projects\STATISTICS DRUG DEV\NBMI4011 - CTI002\Analyser\Script\SAS\T\_ms003.sas, on: 23MAY2016:14:00, by: maria.lidsell

Version of source data: nbmi\_ma2.sas7bdat, last modified: 24FEB16:23:13, status: Final

\*) Scores are 0 or 1, where 1 contributes to the Medical Score Sum.

Table DE3.5.1 Shift table of baseline vs. Post baseline of Mercury intoxication medical score sum - Item 5. Ataxia of gait (Full analysis set)

| Visit            | Treatment        | Baseline score*<br>(Screening visit) | Post baseline score* |             |             |
|------------------|------------------|--------------------------------------|----------------------|-------------|-------------|
|                  |                  |                                      | 0                    | 1           | Total       |
| Follow-up day 15 | Total (n=36)     | 0                                    | 7 (70%)              | 3 (30%)     | 10 (27.78%) |
|                  |                  | 1                                    | 4 (15.38%)           | 22 (84.62%) | 26 (72.22%) |
|                  |                  | Total                                | 11 (30.56%)          | 25 (69.44%) | 36 (100%)   |
|                  | NBMI100mg (n=13) | 0                                    | 2 (50%)              | 2 (50%)     | 4 (30.77%)  |
|                  |                  | 1                                    |                      | 9 (100%)    | 9 (69.23%)  |
|                  |                  | Total                                | 2 (15.38%)           | 11 (84.62%) | 13 (100%)   |
|                  | NBMI300mg (n=11) | 0                                    | 2 (66.67%)           | 1 (33.33%)  | 3 (27.27%)  |
|                  |                  | 1                                    | 2 (25%)              | 6 (75%)     | 8 (72.73%)  |
|                  |                  | Total                                | 4 (36.36%)           | 7 (63.64%)  | 11 (100%)   |
|                  | Placebo (n=12)   | 0                                    | 3 (100%)             |             | 3 (25%)     |
|                  |                  | 1                                    | 2 (22.22%)           | 7 (77.78%)  | 9 (75%)     |
|                  |                  | Total                                | 5 (41.67%)           | 7 (58.33%)  | 12 (100%)   |
| Follow-up day 45 | Total (n=36)     | 0                                    | 6 (60%)              | 4 (40%)     | 10 (27.78%) |
|                  |                  | 1                                    | 8 (30.77%)           | 18 (69.23%) | 26 (72.22%) |
|                  |                  | Total                                | 14 (38.89%)          | 22 (61.11%) | 36 (100%)   |
|                  | NBMI100mg (n=13) | 0                                    | 3 (75%)              | 1 (25%)     | 4 (30.77%)  |
|                  |                  | 1                                    | 1 (11.11%)           | 8 (88.89%)  | 9 (69.23%)  |
|                  |                  | Total                                | 4 (30.77%)           | 9 (69.23%)  | 13 (100%)   |
|                  | NBMI300mg (n=11) | 0                                    | 1 (33.33%)           | 2 (66.67%)  | 3 (27.27%)  |
|                  |                  | 1                                    | 3 (37.5%)            | 5 (62.5%)   | 8 (72.73%)  |
|                  |                  | Total                                | 4 (36.36%)           | 7 (63.64%)  | 11 (100%)   |
|                  | Placebo (n=12)   | 0                                    | 2 (66.67%)           | 1 (33.33%)  | 3 (25%)     |
|                  |                  | 1                                    | 4 (44.44%)           | 5 (55.56%)  | 9 (75%)     |
|                  |                  | Total                                | 6 (50%)              | 6 (50%)     | 12 (100%)   |

Executed script: \\SDS-SERVER2\SAS\$\SDS3\Projects\STATISTICS DRUG DEV\NBMI4011 - CTI002\Analyser\Script\SAS\T\_ms003.sas, on: 23MAY2016:14:00, by: maria.lidsell

Version of source data: nbmi\_ma2.sas7bdat, last modified: 24FEB16:23:13, status: Final

\*) Scores are 0 or 1, where 1 contributes to the Medical Score Sum.

Table DE3.6.1 Shift table of baseline vs. Post baseline of Mercury intoxication medical score sum - Item 6. Dysdiadochokinesia (Full analysis set)

| Visit            | Treatment        | Baseline score*<br>(Screening visit) | Post baseline score* |             |             |
|------------------|------------------|--------------------------------------|----------------------|-------------|-------------|
|                  |                  |                                      | 0                    | 1           | Total       |
| Follow-up day 15 | Total (n=36)     | 0                                    | 2 (50%)              | 2 (50%)     | 4 (11.11%)  |
|                  |                  | 1                                    | 7 (21.88%)           | 25 (78.13%) | 32 (88.89%) |
|                  |                  | Total                                | 9 (25%)              | 27 (75%)    | 36 (100%)   |
|                  | NBMI100mg (n=13) | 0                                    |                      | 1 (100%)    | 1 (7.69%)   |
|                  |                  | 1                                    | 2 (16.67%)           | 10 (83.33%) | 12 (92.31%) |
|                  |                  | Total                                | 2 (15.38%)           | 11 (84.62%) | 13 (100%)   |
|                  | NBMI300mg (n=11) | 0                                    | 1 (50%)              | 1 (50%)     | 2 (18.18%)  |
|                  |                  | 1                                    | 3 (33.33%)           | 6 (66.67%)  | 9 (81.82%)  |
|                  |                  | Total                                | 4 (36.36%)           | 7 (63.64%)  | 11 (100%)   |
|                  | Placebo (n=12)   | 0                                    | 1 (100%)             |             | 1 (8.33%)   |
|                  |                  | 1                                    | 2 (18.18%)           | 9 (81.82%)  | 11 (91.67%) |
|                  |                  | Total                                | 3 (25%)              | 9 (75%)     | 12 (100%)   |
| Follow-up day 45 | Total (n=36)     | 0                                    | 1 (25%)              | 3 (75%)     | 4 (11.11%)  |
|                  |                  | 1                                    | 7 (21.88%)           | 25 (78.13%) | 32 (88.89%) |
|                  |                  | Total                                | 8 (22.22%)           | 28 (77.78%) | 36 (100%)   |
|                  | NBMI100mg (n=13) | 0                                    |                      | 1 (100%)    | 1 (7.69%)   |
|                  |                  | 1                                    | 1 (8.33%)            | 11 (91.67%) | 12 (92.31%) |
|                  |                  | Total                                | 1 (7.69%)            | 12 (92.31%) | 13 (100%)   |
|                  | NBMI300mg (n=11) | 0                                    |                      | 2 (100%)    | 2 (18.18%)  |
|                  |                  | 1                                    | 3 (33.33%)           | 6 (66.67%)  | 9 (81.82%)  |
|                  |                  | Total                                | 3 (27.27%)           | 8 (72.73%)  | 11 (100%)   |
|                  | Placebo (n=12)   | 0                                    | 1 (100%)             |             | 1 (8.33%)   |
|                  |                  | 1                                    | 3 (27.27%)           | 8 (72.73%)  | 11 (91.67%) |
|                  |                  | Total                                | 4 (33.33%)           | 8 (66.67%)  | 12 (100%)   |

Executed script: \\SDS-SERVER2\SAS\$\SDS3\Projects\STATISTICS DRUG DEV\NBMI4011 - CTI002\Analyser\Script\SAS\T\_ms003.sas, on: 23MAY2016:14:00, by: maria.lidsell

Version of source data: nbmi\_ma2.sas7bdat, last modified: 24FEB16:23:13, status: Final

\*) Scores are 0 or 1, where 1 contributes to the Medical Score Sum.

Table DE3.7.1 Shift table of baseline vs. Post baseline of Mercury intoxication medical score sum - Item 7. Heel-to-chin test (Full analysis set)

| Visit            | Treatment        | Baseline score*<br>(Screening visit) | Post baseline score* |             |             |
|------------------|------------------|--------------------------------------|----------------------|-------------|-------------|
|                  |                  |                                      | 0                    | 1           | Total       |
| Follow-up day 15 | Total (n=36)     | 0                                    | 4 (100%)             |             | 4 (11.11%)  |
|                  |                  | 1                                    | 11 (34.38%)          | 21 (65.63%) | 32 (88.89%) |
|                  |                  | Total                                | 15 (41.67%)          | 21 (58.33%) | 36 (100%)   |
|                  | NBMI100mg (n=13) | 0                                    | 1 (100%)             |             | 1 (7.69%)   |
|                  |                  | 1                                    | 2 (16.67%)           | 10 (83.33%) | 12 (92.31%) |
|                  |                  | Total                                | 3 (23.08%)           | 10 (76.92%) | 13 (100%)   |
|                  | NBMI300mg (n=11) | 0                                    | 2 (100%)             |             | 2 (18.18%)  |
|                  |                  | 1                                    | 4 (44.44%)           | 5 (55.56%)  | 9 (81.82%)  |
|                  |                  | Total                                | 6 (54.55%)           | 5 (45.45%)  | 11 (100%)   |
|                  | Placebo (n=12)   | 0                                    | 1 (100%)             |             | 1 (8.33%)   |
|                  |                  | 1                                    | 5 (45.45%)           | 6 (54.55%)  | 11 (91.67%) |
|                  |                  | Total                                | 6 (50%)              | 6 (50%)     | 12 (100%)   |
| Follow-up day 45 | Total (n=36)     | 0                                    | 3 (75%)              |             | 4 (11.11%)  |
|                  |                  | 1                                    | 16 (50%)             | 16 (50%)    | 32 (88.89%) |
|                  |                  | Total                                | 19 (52.78%)          | 17 (47.22%) | 36 (100%)   |
|                  | NBMI100mg (n=13) | 0                                    | 1 (100%)             |             | 1 (7.69%)   |
|                  |                  | 1                                    | 5 (41.67%)           | 7 (58.33%)  | 12 (92.31%) |
|                  |                  | Total                                | 5 (38.46%)           | 8 (61.54%)  | 13 (100%)   |
|                  | NBMI300mg (n=11) | 0                                    | 2 (100%)             |             | 2 (18.18%)  |
|                  |                  | 1                                    | 6 (66.67%)           | 3 (33.33%)  | 9 (81.82%)  |
|                  |                  | Total                                | 8 (72.73%)           | 3 (27.27%)  | 11 (100%)   |
|                  | Placebo (n=12)   | 0                                    | 1 (100%)             |             | 1 (8.33%)   |
|                  |                  | 1                                    | 5 (45.45%)           | 6 (54.55%)  | 11 (91.67%) |
|                  |                  | Total                                | 6 (50%)              | 6 (50%)     | 12 (100%)   |

Executed script: \\SDS-SERVER2\SAS\$\SDS3\Projects\STATISTICS DRUG DEV\NBMI4011 - CTI002\Analyser\Script\SAS\T\_ms003.sas, on: 23MAY2016:14:00, by: maria.lidsell

Version of source data: nbmi\_ma2.sas7bdat, last modified: 24FEB16:23:13, status: Final

\*) Scores are 0 or 1, where 1 contributes to the Medical Score Sum.

Table DE3.8.1 Shift table of baseline vs. Post baseline of Mercury intoxication medical score sum - Item 8. Proteinuria (Full analysis set)

| Visit            | Treatment        | Baseline score*<br>(Screening visit) | Post baseline score* |   |             |
|------------------|------------------|--------------------------------------|----------------------|---|-------------|
|                  |                  |                                      | 0                    | 1 | Total       |
| Follow-up day 15 | Total (n=36)     | 0                                    | 35 (100%)            |   | 35 (97.22%) |
|                  |                  | 1                                    | 1 (100%)             |   | 1 (2.78%)   |
|                  |                  | Total                                | 36 (100%)            |   | 36 (100%)   |
|                  | NBMI100mg (n=13) | 0                                    | 13 (100%)            |   | 13 (100%)   |
|                  |                  | Total                                | 13 (100%)            |   | 13 (100%)   |
|                  |                  |                                      |                      |   |             |
|                  | NBMI300mg (n=11) | 0                                    | 10 (100%)            |   | 10 (90.91%) |
|                  |                  | 1                                    | 1 (100%)             |   | 1 (9.09%)   |
|                  |                  | Total                                | 11 (100%)            |   | 11 (100%)   |
|                  | Placebo (n=12)   | 0                                    | 12 (100%)            |   | 12 (100%)   |
|                  |                  | Total                                | 12 (100%)            |   | 12 (100%)   |
|                  |                  |                                      |                      |   |             |
| Follow-up day 45 | Total (n=36)     | 0                                    | 35 (100%)            |   | 35 (97.22%) |
|                  |                  | 1                                    | 1 (100%)             |   | 1 (2.78%)   |
|                  |                  | Total                                | 36 (100%)            |   | 36 (100%)   |
|                  | NBMI100mg (n=13) | 0                                    | 13 (100%)            |   | 13 (100%)   |
|                  |                  | Total                                | 13 (100%)            |   | 13 (100%)   |
|                  |                  |                                      |                      |   |             |
|                  | NBMI300mg (n=11) | 0                                    | 10 (100%)            |   | 10 (90.91%) |
|                  |                  | 1                                    | 1 (100%)             |   | 1 (9.09%)   |
|                  |                  | Total                                | 11 (100%)            |   | 11 (100%)   |
|                  | Placebo (n=12)   | 0                                    | 12 (100%)            |   | 12 (100%)   |
|                  |                  | Total                                | 12 (100%)            |   | 12 (100%)   |
|                  |                  |                                      |                      |   |             |

Executed script: \\SDS-SERVER2\SAS\$\SDS3\Projects\STATISTICS DRUG DEV\NBMI4011 - CTI002\Analyser\Script\SAS\T\_ms003.sas, on: 23MAY2016:14:00, by: maria.lidsell

Version of source data: nbmi\_ma2.sas7bdat, last modified: 24FEB16:23:13, status: Final

\*) Scores are 0 or 1, where 1 contributes to the Medical Score Sum.

Table DE3.9.1 Shift table of baseline vs. Post baseline of Mercury intoxication medical score sum - Item 9. Match box test (Full analysis set)

| Visit            | Treatment        | Baseline score*<br>(Screening visit) | Post baseline score* |             |             |
|------------------|------------------|--------------------------------------|----------------------|-------------|-------------|
|                  |                  |                                      | 0                    | 1           | Total       |
| Follow-up day 15 | Total (n=36)     | 0                                    | 3 (100%)             |             | 3 (8.33%)   |
|                  |                  | 1                                    | 19 (57.58%)          | 14 (42.42%) | 33 (91.67%) |
|                  |                  | Total                                | 22 (61.11%)          | 14 (38.89%) | 36 (100%)   |
|                  | NBMI100mg (n=13) | 0                                    | 1 (100%)             |             | 1 (7.69%)   |
|                  |                  | 1                                    | 5 (41.67%)           | 7 (58.33%)  | 12 (92.31%) |
|                  |                  | Total                                | 6 (46.15%)           | 7 (53.85%)  | 13 (100%)   |
|                  | NBMI300mg (n=11) | 0                                    | 1 (100%)             |             | 1 (9.09%)   |
|                  |                  | 1                                    | 6 (60%)              | 4 (40%)     | 10 (90.91%) |
|                  |                  | Total                                | 7 (63.64%)           | 4 (36.36%)  | 11 (100%)   |
|                  | Placebo (n=12)   | 0                                    | 1 (100%)             |             | 1 (8.33%)   |
|                  |                  | 1                                    | 8 (72.73%)           | 3 (27.27%)  | 11 (91.67%) |
|                  |                  | Total                                | 9 (75%)              | 3 (25%)     | 12 (100%)   |
| Follow-up day 45 | Total (n=36)     | 0                                    | 2 (66.67%)           |             | 3 (8.33%)   |
|                  |                  | 1                                    | 21 (63.64%)          | 12 (36.36%) | 33 (91.67%) |
|                  |                  | Total                                | 23 (63.89%)          | 13 (36.11%) | 36 (100%)   |
|                  | NBMI100mg (n=13) | 0                                    | 1 (100%)             |             | 1 (7.69%)   |
|                  |                  | 1                                    | 8 (66.67%)           | 4 (33.33%)  | 12 (92.31%) |
|                  |                  | Total                                | 9 (69.23%)           | 4 (30.77%)  | 13 (100%)   |
|                  | NBMI300mg (n=11) | 0                                    | 1 (100%)             |             | 1 (9.09%)   |
|                  |                  | 1                                    | 5 (50%)              | 5 (50%)     | 10 (90.91%) |
|                  |                  | Total                                | 6 (54.55%)           | 5 (45.45%)  | 11 (100%)   |
|                  | Placebo (n=12)   | 0                                    | 1 (100%)             |             | 1 (8.33%)   |
|                  |                  | 1                                    | 8 (72.73%)           | 3 (27.27%)  | 11 (91.67%) |
|                  |                  | Total                                | 8 (66.67%)           | 4 (33.33%)  | 12 (100%)   |

Executed script: \\SDS-SERVER2\SAS\$\SDS3\Projects\STATISTICS DRUG DEV\NBMI4011 - CTI002\Analyser\Script\SAS\T\_ms003.sas, on: 23MAY2016:14:00, by: maria.lidsell

Version of source data: nbmi\_ma2.sas7bdat, last modified: 24FEB16:23:13, status: Final

\*) Scores are 0 or 1, where 1 contributes to the Medical Score Sum.

Table DE3.10.1 Shift table of baseline vs. Post baseline of Mercury intoxication medical score sum - Item 10. Pencil tapping test (Full analysis set)

| Visit            | Treatment        | Baseline score*<br>(Screening visit) | Post baseline score* |            |             |
|------------------|------------------|--------------------------------------|----------------------|------------|-------------|
|                  |                  |                                      | 0                    | 1          | Total       |
| Follow-up day 15 | Total (n=36)     | 0                                    | 9 (100%)             |            | 9 (25%)     |
|                  |                  | 1                                    | 24 (88.89%)          | 3 (11.11%) | 27 (75%)    |
|                  |                  | Total                                | 33 (91.67%)          | 3 (8.33%)  | 36 (100%)   |
|                  | NBMI100mg (n=13) | 0                                    | 2 (100%)             |            | 2 (15.38%)  |
|                  |                  | 1                                    | 10 (90.91%)          | 1 (9.09%)  | 11 (84.62%) |
|                  |                  | Total                                | 12 (92.31%)          | 1 (7.69%)  | 13 (100%)   |
|                  | NBMI300mg (n=11) | 0                                    | 3 (100%)             |            | 3 (27.27%)  |
|                  |                  | 1                                    | 7 (87.5%)            | 1 (12.5%)  | 8 (72.73%)  |
|                  |                  | Total                                | 10 (90.91%)          | 1 (9.09%)  | 11 (100%)   |
|                  | Placebo (n=12)   | 0                                    | 4 (100%)             |            | 4 (33.33%)  |
|                  |                  | 1                                    | 7 (87.5%)            | 1 (12.5%)  | 8 (66.67%)  |
|                  |                  | Total                                | 11 (91.67%)          | 1 (8.33%)  | 12 (100%)   |
| Follow-up day 45 | Total (n=36)     | 0                                    | 9 (100%)             |            | 9 (25%)     |
|                  |                  | 1                                    | 26 (96.3%)           | 1 (3.7%)   | 27 (75%)    |
|                  |                  | Total                                | 35 (97.22%)          | 1 (2.78%)  | 36 (100%)   |
|                  | NBMI100mg (n=13) | 0                                    | 2 (100%)             |            | 2 (15.38%)  |
|                  |                  | 1                                    | 10 (90.91%)          | 1 (9.09%)  | 11 (84.62%) |
|                  |                  | Total                                | 12 (92.31%)          | 1 (7.69%)  | 13 (100%)   |
|                  | NBMI300mg (n=11) | 0                                    | 3 (100%)             |            | 3 (27.27%)  |
|                  |                  | 1                                    | 8 (100%)             |            | 8 (72.73%)  |
|                  |                  | Total                                | 11 (100%)            |            | 11 (100%)   |
|                  | Placebo (n=12)   | 0                                    | 4 (100%)             |            | 4 (33.33%)  |
|                  |                  | 1                                    | 8 (100%)             |            | 8 (66.67%)  |
|                  |                  | Total                                | 12 (100%)            |            | 12 (100%)   |

Executed script: \\SDS-SERVER2\SAS\$\SDS3\Projects\STATISTICS DRUG DEV\NBMI4011 - CTI002\Analyser\Script\SAS\T\_ms003.sas, on: 23MAY2016:14:00, by: maria.lidsell

Version of source data: nbmi\_ma2.sas7bdat, last modified: 24FEB16:23:13, status: Final

\*) Scores are 0 or 1, where 1 contributes to the Medical Score Sum.



Table DE4.1.1 Categorical summary of change from usual of Chronic mercury intoxication symptoms - Item 1. Metallic taste (Full analysis set)

| Treatment        | Visit            | Result*     |             |                        |                   | Change from usual** |                  |            |             |            |            |   |
|------------------|------------------|-------------|-------------|------------------------|-------------------|---------------------|------------------|------------|-------------|------------|------------|---|
|                  |                  | n           | NA***       | much better than usual | better than usual | same as usual       | worse than usual | n          | nmiss       | -1         | 0          | 1 |
| Total (n=36)     | Follow-up day 15 | 17 (47.22%) | 11 (30.56%) | 1 (2.78%)              | 1 (2.78%)         | 4 (11.11%)          |                  | 6 (16.67%) | 11 (30.56%) | 2 (5.56%)  | 4 (11.11%) |   |
|                  | Follow-up day 45 | 17 (47.22%) | 13 (36.11%) | 2 (5.56%)              | 2 (5.56%)         |                     |                  | 4 (11.11%) | 13 (36.11%) | 4 (11.11%) |            |   |
| NBMI100mg (n=13) | Follow-up day 15 | 6 (46.15%)  | 3 (23.08%)  |                        |                   | 3 (23.08%)          |                  | 3 (23.08%) | 3 (23.08%)  |            | 3 (23.08%) |   |
|                  | Follow-up day 45 | 6 (46.15%)  | 5 (38.46%)  |                        | 1 (7.69%)         |                     |                  | 1 (7.69%)  | 5 (38.46%)  | 1 (7.69%)  |            |   |
| NBMI300mg (n=11) | Follow-up day 15 | 5 (45.45%)  | 4 (36.36%)  |                        |                   | 1 (9.09%)           |                  | 1 (9.09%)  | 4 (36.36%)  |            | 1 (9.09%)  |   |
|                  | Follow-up day 45 | 5 (45.45%)  | 4 (36.36%)  |                        | 1 (9.09%)         |                     |                  | 1 (9.09%)  | 4 (36.36%)  | 1 (9.09%)  |            |   |
| Placebo (n=12)   | Follow-up day 15 | 6 (50%)     | 4 (33.33%)  | 1 (8.33%)              | 1 (8.33%)         |                     |                  | 2 (16.67%) | 4 (33.33%)  | 2 (16.67%) |            |   |
|                  | Follow-up day 45 | 6 (50%)     | 4 (33.33%)  | 2 (16.67%)             |                   |                     |                  | 2 (16.67%) | 4 (33.33%)  | 2 (16.67%) |            |   |

Executed script: \\SDS-SERVER2\SAS\$\SDS3\Projects\STATISTICS DRUG DEV\NBMI4011 - CTI002\Analyser\Script\SAS\T\_mi002.sas, on: 23MAY2016:14:00, by: maria.lidsell

Version of source data: nbmi\_ch1.sas7bdat, last modified: 24FEB16:23:13, status: Final

\*) Scores are counted according to: much better than usual=0, better than usual=0, same as usual=1, worse than usual=2, much worse than usual=3.

\*\*) Change for chronic mercury intoxication symptoms is defined as difference from 1=same as usual.

\*\*\*) Missing results registered in database as 'NA'

Table DE4.2.1 Categorical summary of change from usual of Chronic mercury intoxication symptoms - Item 2. Irritability (Full analysis set)

| Treatment        | Visit            | Result*     |           |                        |                   | Change from usual** |                  |             |           |             |           |           |
|------------------|------------------|-------------|-----------|------------------------|-------------------|---------------------|------------------|-------------|-----------|-------------|-----------|-----------|
|                  |                  | n           | NA***     | much better than usual | better than usual | same as usual       | worse than usual | n           | nmiss     | -1          | 0         | 1         |
| Total (n=36)     | Follow-up day 15 | 17 (47.22%) | 2 (5.56%) | 3 (8.33%)              | 11 (30.56%)       | 1 (2.78%)           |                  | 15 (41.67%) | 2 (5.56%) | 14 (38.89%) | 1 (2.78%) |           |
|                  | Follow-up day 45 | 17 (47.22%) | 2 (5.56%) | 4 (11.11%)             | 9 (25%)           | 1 (2.78%)           | 1 (2.78%)        | 15 (41.67%) | 2 (5.56%) | 13 (36.11%) | 1 (2.78%) | 1 (2.78%) |
| NBMI100mg (n=13) | Follow-up day 15 | 6 (46.15%)  | 1 (7.69%) |                        | 4 (30.77%)        | 1 (7.69%)           |                  | 5 (38.46%)  | 1 (7.69%) | 4 (30.77%)  | 1 (7.69%) |           |
|                  | Follow-up day 45 | 6 (46.15%)  | 1 (7.69%) | 1 (7.69%)              | 3 (23.08%)        |                     | 1 (7.69%)        | 5 (38.46%)  | 1 (7.69%) | 4 (30.77%)  |           | 1 (7.69%) |
| NBMI300mg (n=11) | Follow-up day 15 | 5 (45.45%)  | 1 (9.09%) | 2 (18.18%)             | 2 (18.18%)        |                     |                  | 4 (36.36%)  | 1 (9.09%) | 4 (36.36%)  |           |           |
|                  | Follow-up day 45 | 5 (45.45%)  | 1 (9.09%) | 2 (18.18%)             | 2 (18.18%)        |                     |                  | 4 (36.36%)  | 1 (9.09%) | 4 (36.36%)  |           |           |
| Placebo (n=12)   | Follow-up day 15 | 6 (50%)     |           | 1 (8.33%)              | 5 (41.67%)        |                     |                  | 6 (50%)     |           | 6 (50%)     |           |           |
|                  | Follow-up day 45 | 6 (50%)     |           | 1 (8.33%)              | 4 (33.33%)        | 1 (8.33%)           |                  | 6 (50%)     |           | 5 (41.67%)  | 1 (8.33%) |           |

Executed script: \\SDS-SERVER2\SAS\$\SDS3\Projects\STATISTICS DRUG DEV\NBMI4011 - CTI002\Analyser\Script\SAS\T\_mi002.sas, on: 23MAY2016:14:00, by: maria.lidsell

Version of source data: nbmi\_ch1.sas7bdat, last modified: 24FEB16:23:13, status: Final

\*) Scores are counted according to: much better than usual=0, better than usual=0, same as usual=1, worse than usual=2, much worse than usual=3.

\*\*) Change for chronic mercury intoxication symptoms is defined as difference from 1=same as usual.

\*\*\*) Missing results registered in database as 'NA'

Table DE4.3.1 Categorical summary of change from usual of Chronic mercury intoxication symptoms - Item 3. Social nervousness and/or withdrawal (Full analysis set)

| Treatment        | Visit            | Result*     |             |                        |                   | Change from usual** |                  |            |            |    |   |
|------------------|------------------|-------------|-------------|------------------------|-------------------|---------------------|------------------|------------|------------|----|---|
|                  |                  | n           | NA***       | much better than usual | better than usual | same as usual       | worse than usual | n          | nmiss      | -1 | 0 |
| Total (n=36)     | Follow-up day 15 | 17 (47.22%) | 10 (27.78%) | 4 (11.11%)             | 3 (8.33%)         | 7 (19.44%)          | 10 (27.78%)      | 4 (11.11%) | 3 (8.33%)  |    |   |
|                  | Follow-up day 45 | 17 (47.22%) | 10 (27.78%) | 4 (11.11%)             | 3 (8.33%)         | 7 (19.44%)          | 10 (27.78%)      | 4 (11.11%) | 3 (8.33%)  |    |   |
| NBMI100mg (n=13) | Follow-up day 15 | 6 (46.15%)  | 4 (30.77%)  | 1 (7.69%)              | 1 (7.69%)         | 2 (15.38%)          | 4 (30.77%)       | 1 (7.69%)  | 1 (7.69%)  |    |   |
|                  | Follow-up day 45 | 6 (46.15%)  | 4 (30.77%)  | 2 (15.38%)             |                   | 2 (15.38%)          | 4 (30.77%)       | 2 (15.38%) |            |    |   |
| NBMI300mg (n=11) | Follow-up day 15 | 5 (45.45%)  | 3 (27.27%)  | 2 (18.18%)             |                   | 2 (18.18%)          | 3 (27.27%)       | 2 (18.18%) |            |    |   |
|                  | Follow-up day 45 | 5 (45.45%)  | 3 (27.27%)  | 2 (18.18%)             |                   | 2 (18.18%)          | 3 (27.27%)       | 2 (18.18%) |            |    |   |
| Placebo (n=12)   | Follow-up day 15 | 6 (50%)     | 3 (25%)     | 1 (8.33%)              | 2 (16.67%)        | 3 (25%)             | 3 (25%)          | 1 (8.33%)  | 2 (16.67%) |    |   |
|                  | Follow-up day 45 | 6 (50%)     | 3 (25%)     |                        | 3 (25%)           | 3 (25%)             | 3 (25%)          |            | 3 (25%)    |    |   |

Executed script: \\SDS-SERVER2\SAS\$\SDS3\Projects\STATISTICS DRUG DEV\NBMI4011 - CTI002\Analyser\Script\SAS\T\_mi002.sas, on: 23MAY2016:14:00, by: maria.lidsell

Version of source data: nbmi\_ch1.sas7bdat, last modified: 24FEB16:23:13, status: Final

\*) Scores are counted according to: much better than usual=0, better than usual=0, same as usual=1, worse than usual=2, much worse than usual=3.

\*\*) Change for chronic mercury intoxication symptoms is defined as difference from 1=same as usual.

\*\*\*) Missing results registered in database as 'NA'

Table DE4.4.1 Categorical summary of change from usual of Chronic mercury intoxication symptoms - Item 4. Memory loss (Full analysis set)

| Treatment        | Visit            | Result*     |            |                        |                   | Change from usual** |                  |            |            |    |   |
|------------------|------------------|-------------|------------|------------------------|-------------------|---------------------|------------------|------------|------------|----|---|
|                  |                  | n           | NA***      | much better than usual | better than usual | same as usual       | worse than usual | n          | nmiss      | -1 | 0 |
| Total (n=36)     | Follow-up day 15 | 17 (47.22%) | 7 (19.44%) | 7 (19.44%)             | 3 (8.33%)         | 10 (27.78%)         | 7 (19.44%)       | 7 (19.44%) | 3 (8.33%)  |    |   |
|                  | Follow-up day 45 | 17 (47.22%) | 6 (16.67%) | 6 (16.67%)             | 5 (13.89%)        | 11 (30.56%)         | 6 (16.67%)       | 6 (16.67%) | 5 (13.89%) |    |   |
| NBMI100mg (n=13) | Follow-up day 15 | 6 (46.15%)  | 3 (23.08%) | 2 (15.38%)             | 1 (7.69%)         | 3 (23.08%)          | 3 (23.08%)       | 2 (15.38%) | 1 (7.69%)  |    |   |
|                  | Follow-up day 45 | 6 (46.15%)  | 2 (15.38%) |                        | 4 (30.77%)        | 4 (30.77%)          | 2 (15.38%)       |            | 4 (30.77%) |    |   |
| NBMI300mg (n=11) | Follow-up day 15 | 5 (45.45%)  | 2 (18.18%) | 2 (18.18%)             | 1 (9.09%)         | 3 (27.27%)          | 2 (18.18%)       | 2 (18.18%) | 1 (9.09%)  |    |   |
|                  | Follow-up day 45 | 5 (45.45%)  | 2 (18.18%) | 2 (18.18%)             | 1 (9.09%)         | 3 (27.27%)          | 2 (18.18%)       | 2 (18.18%) | 1 (9.09%)  |    |   |
| Placebo (n=12)   | Follow-up day 15 | 6 (50%)     | 2 (16.67%) | 3 (25%)                | 1 (8.33%)         | 4 (33.33%)          | 2 (16.67%)       | 3 (25%)    | 1 (8.33%)  |    |   |
|                  | Follow-up day 45 | 6 (50%)     | 2 (16.67%) | 4 (33.33%)             |                   | 4 (33.33%)          | 2 (16.67%)       | 4 (33.33%) |            |    |   |

Executed script: \\SDS-SERVER2\SAS\$\SDS3\Projects\STATISTICS DRUG DEV\NBMI4011 - CTI002\Analyser\Script\SAS\T\_mi002.sas, on: 23MAY2016:14:00, by: maria.lidsell

Version of source data: nbmi\_ch1.sas7bdat, last modified: 24FEB16:23:13, status: Final

\*) Scores are counted according to: much better than usual=0, better than usual=0, same as usual=1, worse than usual=2, much worse than usual=3.

\*\*) Change for chronic mercury intoxication symptoms is defined as difference from 1=same as usual.

\*\*\*) Missing results registered in database as 'NA'

Table DE4.5.1 Categorical summary of change from usual of Chronic mercury intoxication symptoms - Item 5. Mental fatigue (Full analysis set)

| Treatment        | Visit            | Result*     |            |                        |                   | Change from usual** |                  |             |            |            |           |   |
|------------------|------------------|-------------|------------|------------------------|-------------------|---------------------|------------------|-------------|------------|------------|-----------|---|
|                  |                  | n           | NA***      | much better than usual | better than usual | same as usual       | worse than usual | n           | nmiss      | -1         | 0         | 1 |
| Total (n=36)     | Follow-up day 15 | 17 (47.22%) | 6 (16.67%) |                        | 8 (22.22%)        | 3 (8.33%)           |                  | 11 (30.56%) | 6 (16.67%) | 8 (22.22%) | 3 (8.33%) |   |
|                  | Follow-up day 45 | 17 (47.22%) | 7 (19.44%) | 3 (8.33%)              | 4 (11.11%)        | 3 (8.33%)           |                  | 10 (27.78%) | 7 (19.44%) | 7 (19.44%) | 3 (8.33%) |   |
| NBMI100mg (n=13) | Follow-up day 15 | 6 (46.15%)  | 4 (30.77%) |                        | 1 (7.69%)         | 1 (7.69%)           |                  | 2 (15.38%)  | 4 (30.77%) | 1 (7.69%)  | 1 (7.69%) |   |
|                  | Follow-up day 45 | 6 (46.15%)  | 5 (38.46%) |                        | 1 (7.69%)         |                     |                  | 1 (7.69%)   | 5 (38.46%) | 1 (7.69%)  |           |   |
| NBMI300mg (n=11) | Follow-up day 15 | 5 (45.45%)  | 1 (9.09%)  |                        | 3 (27.27%)        | 1 (9.09%)           |                  | 4 (36.36%)  | 1 (9.09%)  | 3 (27.27%) | 1 (9.09%) |   |
|                  | Follow-up day 45 | 5 (45.45%)  | 1 (9.09%)  | 2 (18.18%)             | 2 (18.18%)        |                     |                  | 4 (36.36%)  | 1 (9.09%)  | 4 (36.36%) |           |   |
| Placebo (n=12)   | Follow-up day 15 | 6 (50%)     | 1 (8.33%)  |                        | 4 (33.33%)        | 1 (8.33%)           |                  | 5 (41.67%)  | 1 (8.33%)  | 4 (33.33%) | 1 (8.33%) |   |
|                  | Follow-up day 45 | 6 (50%)     | 1 (8.33%)  | 1 (8.33%)              | 1 (8.33%)         | 3 (25%)             |                  | 5 (41.67%)  | 1 (8.33%)  | 2 (16.67%) | 3 (25%)   |   |

Executed script: \\SDS-SERVER2\SAS\$\SDS3\Projects\STATISTICS DRUG DEV\NBMI4011 - CTI002\Analyser\Script\SAS\T\_mi002.sas, on: 23MAY2016:14:00, by: maria.lidsell

Version of source data: nbmi\_ch1.sas7bdat, last modified: 24FEB16:23:13, status: Final

\*) Scores are counted according to: much better than usual=0, better than usual=0, same as usual=1, worse than usual=2, much worse than usual=3.

\*\*) Change for chronic mercury intoxication symptoms is defined as difference from 1=same as usual.

\*\*\*) Missing results registered in database as 'NA'

Table DE4.6.1 Categorical summary of change from usual of Chronic mercury intoxication symptoms - Item 6. Physical fatigue (Full analysis set)

| Treatment        | Visit            | Result*     |            |                        |                   |               |                  | Change from usual** |             |           |   |   |
|------------------|------------------|-------------|------------|------------------------|-------------------|---------------|------------------|---------------------|-------------|-----------|---|---|
|                  |                  | n           | NA***      | much better than usual | better than usual | same as usual | worse than usual | n                   | nmiss       | -1        | 0 | 1 |
| Total (n=36)     | Follow-up day 15 | 17 (47.22%) | 6 (16.67%) | 1 (2.78%)              | 9 (25%)           | 1 (2.78%)     | 11 (30.56%)      | 6 (16.67%)          | 10 (27.78%) | 1 (2.78%) |   |   |
|                  | Follow-up day 45 | 17 (47.22%) | 7 (19.44%) | 3 (8.33%)              | 6 (16.67%)        | 1 (2.78%)     | 10 (27.78%)      | 7 (19.44%)          | 9 (25%)     | 1 (2.78%) |   |   |
| NBMI100mg (n=13) | Follow-up day 15 | 6 (46.15%)  | 3 (23.08%) |                        | 3 (23.08%)        |               | 3 (23.08%)       | 3 (23.08%)          | 3 (23.08%)  |           |   |   |
|                  | Follow-up day 45 | 6 (46.15%)  | 4 (30.77%) |                        | 2 (15.38%)        |               | 2 (15.38%)       | 4 (30.77%)          | 2 (15.38%)  |           |   |   |
| NBMI300mg (n=11) | Follow-up day 15 | 5 (45.45%)  | 1 (9.09%)  | 1 (9.09%)              | 2 (18.18%)        | 1 (9.09%)     | 4 (36.36%)       | 1 (9.09%)           | 3 (27.27%)  | 1 (9.09%) |   |   |
|                  | Follow-up day 45 | 5 (45.45%)  | 1 (9.09%)  | 2 (18.18%)             | 2 (18.18%)        |               | 4 (36.36%)       | 1 (9.09%)           | 4 (36.36%)  |           |   |   |
| Placebo (n=12)   | Follow-up day 15 | 6 (50%)     | 2 (16.67%) |                        | 4 (33.33%)        |               | 4 (33.33%)       | 2 (16.67%)          | 4 (33.33%)  |           |   |   |
|                  | Follow-up day 45 | 6 (50%)     | 2 (16.67%) | 1 (8.33%)              | 2 (16.67%)        | 1 (8.33%)     | 4 (33.33%)       | 2 (16.67%)          | 3 (25%)     | 1 (8.33%) |   |   |

Executed script: \\SDS-SERVER2\SAS\$\SDS3\Projects\STATISTICS DRUG DEV\NBMI4011 - CTI002\Analyser\Script\SAS\T\_mi002.sas, on: 23MAY2016:14:00, by: maria.lidsell

Version of source data: nbmi\_ch1.sas7bdat, last modified: 24FEB16:23:13, status: Final

\*) Scores are counted according to: much better than usual=0, better than usual=0, same as usual=1, worse than usual=2, much worse than usual=3.

\*\*) Change for chronic mercury intoxication symptoms is defined as difference from 1=same as usual.

\*\*\*) Missing results registered in database as 'NA'

Table DE5.1.1 Change from baseline of NMB, Index, Tremor Index (Full analysis set)

| Treatment        | Visit            | Result    |        |      |       |      |        |      |     |     | Change from baseline (Visit day 1) |        |       |       |       |        |      |     |     |
|------------------|------------------|-----------|--------|------|-------|------|--------|------|-----|-----|------------------------------------|--------|-------|-------|-------|--------|------|-----|-----|
|                  |                  | n         | nmiss  | Mean | SD    | Q1   | Median | Q3   | Min | Max | n                                  | nmiss  | Mean  | SD    | Q1    | Median | Q3   | Min | Max |
| Total (n=36)     | Visit day 1      | 36 (100%) | 0 (0%) | 41.7 | 10.86 | 34   | 43     | 48   | 15  | 61  |                                    |        |       |       |       |        |      |     |     |
|                  | Follow-up day 15 | 36 (100%) | 0 (0%) | 39   | 13.25 | 27.5 | 38     | 48.5 | 10  | 62  | 36 (100%)                          | 0 (0%) | -2.6  | 15.81 | -11   | -2.5   | 7    | -36 | 30  |
|                  | Follow-up day 45 | 36 (100%) | 0 (0%) | 36.3 | 16.24 | 27   | 41     | 50   | 4   | 60  | 36 (100%)                          | 0 (0%) | -5.4  | 19.89 | -18.5 | -1     | 7    | -41 | 45  |
| NBMI100mg (n=13) | Visit day 1      | 13 (100%) | 0 (0%) | 43.3 | 9.05  | 40   | 44     | 48   | 24  | 57  |                                    |        |       |       |       |        |      |     |     |
|                  | Follow-up day 15 | 13 (100%) | 0 (0%) | 44   | 12.64 | 31   | 46     | 56   | 26  | 61  | 13 (100%)                          | 0 (0%) | 0.7   | 14.29 | -11   | -1     | 7    | -20 | 30  |
|                  | Follow-up day 45 | 13 (100%) | 0 (0%) | 39.2 | 16.34 | 33   | 42     | 51   | 5   | 58  | 13 (100%)                          | 0 (0%) | -4.2  | 20.77 | -15   | -2     | 8    | -41 | 27  |
| NBMI300mg (n=11) | Visit day 1      | 11 (100%) | 0 (0%) | 37.1 | 13.6  | 27   | 36     | 44   | 15  | 61  |                                    |        |       |       |       |        |      |     |     |
|                  | Follow-up day 15 | 11 (100%) | 0 (0%) | 39.2 | 11.01 | 32   | 39     | 45   | 22  | 62  | 11 (100%)                          | 0 (0%) | 2.1   | 13.58 | -6    | 0      | 14   | -26 | 22  |
|                  | Follow-up day 45 | 11 (100%) | 0 (0%) | 33.2 | 16.93 | 22   | 30     | 46   | 8   | 60  | 11 (100%)                          | 0 (0%) | -3.9  | 20.7  | -19   | -8     | 7    | -31 | 45  |
| Placebo (n=12)   | Visit day 1      | 12 (100%) | 0 (0%) | 44.1 | 9.35  | 36   | 46     | 50.5 | 31  | 58  |                                    |        |       |       |       |        |      |     |     |
|                  | Follow-up day 15 | 12 (100%) | 0 (0%) | 33.5 | 14.54 | 25   | 31     | 42   | 10  | 60  | 12 (100%)                          | 0 (0%) | -10.6 | 17.35 | -26.5 | -8.5   | -1.5 | -36 | 23  |
|                  | Follow-up day 45 | 12 (100%) | 0 (0%) | 36   | 16.37 | 29   | 39.5   | 48   | 4   | 54  | 12 (100%)                          | 0 (0%) | -8.1  | 19.67 | -26   | 1      | 7    | -38 | 13  |

Executed script: \\SDS-SERVER2\SAS\$\SDS3\Projects\STATISTICS DRUG DEV\NBMI4011 - CTI002\Analyser\Script\SAS\T\_cat001.sas, on: 23MAY2016:14:00, by: maria.lidsell  
Version of source data: nbmi\_neu.sas7bdat, last modified: 24FEB16:23:13, status: Final

Table DE5.2.1 Change from baseline of NMB, Index, Sway Index (Full analysis set)

| Treatment        | Visit            | Result    |        | Change from baseline (Visit day 1) |       |       |        |       |     |     |           |        |       |       |       |        |     |      |     |
|------------------|------------------|-----------|--------|------------------------------------|-------|-------|--------|-------|-----|-----|-----------|--------|-------|-------|-------|--------|-----|------|-----|
|                  |                  | n         | nmiss  | Mean                               | SD    | Q1    | Median | Q3    | Min | Max | n         | nmiss  | Mean  | SD    | Q1    | Median | Q3  | Min  | Max |
| Total (n=36)     | Visit day 1      | 36 (100%) | 0 (0%) | 175.6                              | 12.39 | 170.5 | 179.5  | 182.5 | 143 | 195 |           |        |       |       |       |        |     |      |     |
|                  | Follow-up day 15 | 36 (100%) | 0 (0%) | 172.1                              | 22.82 | 167   | 179    | 186   | 96  | 195 | 36 (100%) | 0 (0%) | -3.5  | 24.63 | -11   | -1     | 6.5 | -99  | 43  |
|                  | Follow-up day 45 | 36 (100%) | 0 (0%) | 164.6                              | 34.93 | 166.5 | 172    | 182.5 | 12  | 195 | 36 (100%) | 0 (0%) | -11   | 31.91 | -13   | -4     | 4.5 | -149 | 25  |
| NBMI100mg (n=13) | Visit day 1      | 13 (100%) | 0 (0%) | 176.5                              | 10.63 | 177   | 180    | 182   | 154 | 188 |           |        |       |       |       |        |     |      |     |
|                  | Follow-up day 15 | 13 (100%) | 0 (0%) | 178.6                              | 15.37 | 177   | 184    | 188   | 144 | 195 | 13 (100%) | 0 (0%) | 2.2   | 13.02 | -2    | 0      | 8   | -25  | 31  |
|                  | Follow-up day 45 | 13 (100%) | 0 (0%) | 158.8                              | 51.57 | 165   | 179    | 186   | 12  | 195 | 13 (100%) | 0 (0%) | -17.7 | 44.23 | -14   | -1     | 4   | -149 | 17  |
| NBMI300mg (n=11) | Visit day 1      | 11 (100%) | 0 (0%) | 175.9                              | 10.85 | 170   | 175    | 183   | 152 | 195 |           |        |       |       |       |        |     |      |     |
|                  | Follow-up day 15 | 11 (100%) | 0 (0%) | 162.7                              | 30.94 | 157   | 171    | 182   | 96  | 194 | 11 (100%) | 0 (0%) | -13.2 | 36.84 | -17   | -1     | 5   | -99  | 28  |
|                  | Follow-up day 45 | 11 (100%) | 0 (0%) | 169.8                              | 27.49 | 168   | 177    | 183   | 90  | 191 | 11 (100%) | 0 (0%) | -6.1  | 28.57 | -11   | -3     | 8   | -85  | 25  |
| Placebo (n=12)   | Visit day 1      | 12 (100%) | 0 (0%) | 174.5                              | 16    | 164   | 180    | 184   | 143 | 195 |           |        |       |       |       |        |     |      |     |
|                  | Follow-up day 15 | 12 (100%) | 0 (0%) | 173.8                              | 19.71 | 170   | 178    | 183.5 | 121 | 194 | 12 (100%) | 0 (0%) | -0.8  | 19.27 | -14   | -3     | 8.5 | -25  | 43  |
|                  | Follow-up day 45 | 12 (100%) | 0 (0%) | 166.2                              | 14.95 | 159.5 | 168    | 173.5 | 139 | 193 | 12 (100%) | 0 (0%) | -8.3  | 16.74 | -19.5 | -7     | -1  | -37  | 24  |

Executed script: \\SDS-SERVER2\SAS\$\SDS3\Projects\STATISTICS DRUG DEV\NBMI4011 - CTI002\Analyser\Script\SAS\T\_cat001.sas, on: 23MAY2016:14:00, by: maria.lidsell  
Version of source data: nbmi\_neu.sas7bdat, last modified: 24FEB16:23:13, status: Final



Table DE5.3.1 Change from baseline of NMB, Index, Catsys Index (Full analysis set)

| Treatment        | Visit            | Result    |        | Change from baseline (Visit day 1) |       |      |        |       |     |     |           |        |      |       |      |        |      |     |     |  |
|------------------|------------------|-----------|--------|------------------------------------|-------|------|--------|-------|-----|-----|-----------|--------|------|-------|------|--------|------|-----|-----|--|
|                  |                  | n         | nmiss  | Mean                               | SD    | Q1   | Median | Q3    | Min | Max | n         | nmiss  | Mean | SD    | Q1   | Median | Q3   | Min | Max |  |
| Total (n=36)     | Visit day 1      | 36 (100%) | 0 (0%) | 93                                 | 23.91 | 72   | 87.5   | 107   | 59  | 148 |           |        |      |       |      |        |      |     |     |  |
|                  | Follow-up day 15 | 36 (100%) | 0 (0%) | 99.5                               | 28.44 | 78   | 100.5  | 121.5 | 29  | 152 | 36 (100%) | 0 (0%) | 6.5  | 23.46 | -10  | 7.5    | 23   | -57 | 44  |  |
|                  | Follow-up day 45 | 36 (100%) | 0 (0%) | 99.8                               | 27.73 | 76   | 99     | 122   | 48  | 158 | 36 (100%) | 0 (0%) | 6.8  | 29.45 | -11  | 3.5    | 21   | -55 | 71  |  |
| NBMI100mg (n=13) | Visit day 1      | 13 (100%) | 0 (0%) | 80.2                               | 19.4  | 64   | 72     | 88    | 62  | 129 |           |        |      |       |      |        |      |     |     |  |
|                  | Follow-up day 15 | 13 (100%) | 0 (0%) | 92.2                               | 27.46 | 76   | 95     | 108   | 29  | 134 | 13 (100%) | 0 (0%) | 12   | 20.66 | 5    | 12     | 23   | -34 | 44  |  |
|                  | Follow-up day 45 | 13 (100%) | 0 (0%) | 92.5                               | 26.68 | 68   | 92     | 113   | 48  | 127 | 13 (100%) | 0 (0%) | 12.4 | 30.26 | -14  | 6      | 26   | -33 | 64  |  |
| NBMI300mg (n=11) | Visit day 1      | 11 (100%) | 0 (0%) | 105                                | 18.05 | 87   | 105    | 116   | 80  | 139 |           |        |      |       |      |        |      |     |     |  |
|                  | Follow-up day 15 | 11 (100%) | 0 (0%) | 101                                | 31.17 | 80   | 98     | 129   | 48  | 144 | 11 (100%) | 0 (0%) | -4   | 27.31 | -24  | 5      | 17   | -57 | 33  |  |
|                  | Follow-up day 45 | 11 (100%) | 0 (0%) | 105.6                              | 28.49 | 77   | 106    | 128   | 61  | 152 | 11 (100%) | 0 (0%) | 0.6  | 31.11 | -29  | -3     | 20   | -44 | 71  |  |
| Placebo (n=12)   | Visit day 1      | 12 (100%) | 0 (0%) | 96                                 | 27.64 | 77   | 89     | 109   | 59  | 148 |           |        |      |       |      |        |      |     |     |  |
|                  | Follow-up day 15 | 12 (100%) | 0 (0%) | 106.1                              | 27.48 | 81   | 112.5  | 127   | 65  | 152 | 12 (100%) | 0 (0%) | 10.1 | 21.16 | -3   | 13.5   | 24   | -33 | 40  |  |
|                  | Follow-up day 45 | 12 (100%) | 0 (0%) | 102.4                              | 28.79 | 80.5 | 90     | 128.5 | 70  | 158 | 12 (100%) | 0 (0%) | 6.4  | 28.36 | -5.5 | 7      | 17.5 | -55 | 53  |  |

Executed script: \\SDS-SERVER2\SAS\$\SDS3\Projects\STATISTICS DRUG DEV\NBMI4011 - CTI002\Analyser\Script\SAS\T\_cat001.sas, on: 23MAY2016:14:00, by: maria.lidsell  
Version of source data: nbmi\_neu.sas7bdat, last modified: 24FEB16:23:13, status: Final

Table DE5.4.1 Change from baseline of NMB, Tremor test, Right hand, Tremor Intensity (Full analysis set)

| Treatment        | Visit            | Result    |        | Change from baseline (Visit day 1) |      |      |        |      |      |      |           |        |      |      |        |        |      |       |      |  |
|------------------|------------------|-----------|--------|------------------------------------|------|------|--------|------|------|------|-----------|--------|------|------|--------|--------|------|-------|------|--|
|                  |                  | n         | nmiss  | Mean                               | SD   | Q1   | Median | Q3   | Min  | Max  | n         | nmiss  | Mean | SD   | Q1     | Median | Q3   | Min   | Max  |  |
| Total (n=36)     | Visit day 1      | 36 (100%) | 0 (0%) | 0.1                                | 0.07 | 0.07 | 0.09   | 0.1  | 0.04 | 0.48 |           |        |      |      |        |        |      |       |      |  |
|                  | Follow-up day 15 | 36 (100%) | 0 (0%) | 0.2                                | 0.5  | 0.07 | 0.09   | 0.12 | 0.04 | 2.96 | 36 (100%) | 0 (0%) | 0.1  | 0.51 | -0.01  | 0.01   | 0.03 | -0.25 | 2.87 |  |
|                  | Follow-up day 45 | 36 (100%) | 0 (0%) | 0.6                                | 1.37 | 0.08 | 0.1    | 0.18 | 0.05 | 5.91 | 36 (100%) | 0 (0%) | 0.5  | 1.38 | 0      | 0.02   | 0.09 | -0.36 | 5.85 |  |
| NBMI100mg (n=13) | Visit day 1      | 13 (100%) | 0 (0%) | 0.1                                | 0.02 | 0.08 | 0.08   | 0.09 | 0.06 | 0.13 |           |        |      |      |        |        |      |       |      |  |
|                  | Follow-up day 15 | 13 (100%) | 0 (0%) | 0.1                                | 0.02 | 0.07 | 0.09   | 0.1  | 0.05 | 0.14 | 13 (100%) | 0 (0%) | 0    | 0.02 | -0.01  | 0      | 0.02 | -0.03 | 0.06 |  |
|                  | Follow-up day 45 | 13 (100%) | 0 (0%) | 0.3                                | 0.71 | 0.09 | 0.1    | 0.16 | 0.08 | 2.66 | 13 (100%) | 0 (0%) | 0.3  | 0.71 | 0.01   | 0.02   | 0.08 | -0.03 | 2.58 |  |
| NBMI300mg (n=11) | Visit day 1      | 11 (100%) | 0 (0%) | 0.1                                | 0.12 | 0.06 | 0.09   | 0.09 | 0.05 | 0.48 |           |        |      |      |        |        |      |       |      |  |
|                  | Follow-up day 15 | 11 (100%) | 0 (0%) | 0.1                                | 0.06 | 0.06 | 0.09   | 0.12 | 0.06 | 0.23 | 11 (100%) | 0 (0%) | 0    | 0.09 | -0.01  | 0.01   | 0.04 | -0.25 | 0.12 |  |
|                  | Follow-up day 45 | 11 (100%) | 0 (0%) | 1.1                                | 1.86 | 0.07 | 0.1    | 2.25 | 0.05 | 5.91 | 11 (100%) | 0 (0%) | 0.9  | 1.89 | -0.02  | 0.01   | 2.19 | -0.36 | 5.85 |  |
| Placebo (n=12)   | Visit day 1      | 12 (100%) | 0 (0%) | 0.1                                | 0.04 | 0.08 | 0.09   | 0.11 | 0.04 | 0.19 |           |        |      |      |        |        |      |       |      |  |
|                  | Follow-up day 15 | 12 (100%) | 0 (0%) | 0.4                                | 0.85 | 0.07 | 0.105  | 0.18 | 0.04 | 2.96 | 12 (100%) | 0 (0%) | 0.3  | 0.85 | -0.005 | 0.01   | 0.06 | -0.07 | 2.87 |  |
|                  | Follow-up day 45 | 12 (100%) | 0 (0%) | 0.6                                | 1.4  | 0.09 | 0.115  | 0.17 | 0.05 | 4.99 | 12 (100%) | 0 (0%) | 0.5  | 1.4  | -0.005 | 0.035  | 0.09 | -0.07 | 4.9  |  |

Executed script: \\SDS-SERVER2\SAS\$\SDS3\Projects\STATISTICS DRUG DEV\NBMI4011 - CTI002\Analyser\Script\SAS\T\_cat001.sas, on: 23MAY2016:14:00, by: maria.lidsell  
Version of source data: nbmi\_neu.sas7bdat, last modified: 24FEB16:23:13, status: Final

Table DE5.5.1 Change from baseline of NMB, Tremor test, Right hand, Centre Frequency (Full analysis set)

| Treatment        | Visit            | Result    |        | Change from baseline (Visit day 1) |       |      |        |      |     |      |           |        |      |       |      |        |       |       |     |  |
|------------------|------------------|-----------|--------|------------------------------------|-------|------|--------|------|-----|------|-----------|--------|------|-------|------|--------|-------|-------|-----|--|
|                  |                  | n         | nmiss  | Mean                               | SD    | Q1   | Median | Q3   | Min | Max  | n         | nmiss  | Mean | SD    | Q1   | Median | Q3    | Min   | Max |  |
| Total (n=36)     | Visit day 1      | 36 (100%) | 0 (0%) | 8.9                                | 8.92  | 6.1  | 7.7    | 9.15 | 4   | 60   |           |        |      |       |      |        |       |       |     |  |
|                  | Follow-up day 15 | 36 (100%) | 0 (0%) | 6.9                                | 2.12  | 5.95 | 7.2    | 8.2  | 0.9 | 11.4 | 36 (100%) | 0 (0%) | -2   | 9.03  | -1.6 | -0.5   | 0.5   | -53.5 | 4.9 |  |
|                  | Follow-up day 45 | 36 (100%) | 0 (0%) | 6.3                                | 2.79  | 4.8  | 7.1    | 8.3  | 0.9 | 11.8 | 36 (100%) | 0 (0%) | -2.7 | 9.21  | -2.3 | -0.95  | 0.2   | -53.5 | 6.1 |  |
| NBMI100mg (n=13) | Visit day 1      | 13 (100%) | 0 (0%) | 7.4                                | 1.26  | 7.2  | 7.7    | 7.9  | 4.5 | 9.4  |           |        |      |       |      |        |       |       |     |  |
|                  | Follow-up day 15 | 13 (100%) | 0 (0%) | 7.7                                | 1.65  | 7    | 7.4    | 8.2  | 5.5 | 11.4 | 13 (100%) | 0 (0%) | 0.3  | 1.85  | -0.5 | -0.3   | 0.5   | -3    | 4.9 |  |
|                  | Follow-up day 45 | 13 (100%) | 0 (0%) | 7.5                                | 2.33  | 7    | 7.7    | 8.4  | 1.3 | 11.8 | 13 (100%) | 0 (0%) | 0.1  | 2.12  | -0.7 | -0.2   | 0.2   | -3.2  | 6.1 |  |
| NBMI300mg (n=11) | Visit day 1      | 11 (100%) | 0 (0%) | 7.2                                | 1.81  | 6    | 7.4    | 8.9  | 4   | 9.6  |           |        |      |       |      |        |       |       |     |  |
|                  | Follow-up day 15 | 11 (100%) | 0 (0%) | 6.8                                | 2.02  | 4.8  | 6.7    | 8.4  | 4   | 10.4 | 11 (100%) | 0 (0%) | -0.4 | 1.49  | -1.7 | -0.5   | 0.8   | -2.9  | 1.9 |  |
|                  | Follow-up day 45 | 11 (100%) | 0 (0%) | 5.3                                | 3.11  | 1.1  | 6.7    | 8.2  | 0.9 | 8.7  | 11 (100%) | 0 (0%) | -1.9 | 3.2   | -3.9 | -1     | 1     | -8.5  | 1.7 |  |
| Placebo (n=12)   | Visit day 1      | 12 (100%) | 0 (0%) | 12.1                               | 15.22 | 5.7  | 8.4    | 10   | 5.2 | 60   |           |        |      |       |      |        |       |       |     |  |
|                  | Follow-up day 15 | 12 (100%) | 0 (0%) | 6.3                                | 2.55  | 5.4  | 6.85   | 8.05 | 0.9 | 8.9  | 12 (100%) | 0 (0%) | -5.8 | 15.14 | -3.6 | -1.5   | -0.45 | -53.5 | 2.5 |  |
|                  | Follow-up day 45 | 12 (100%) | 0 (0%) | 5.8                                | 2.66  | 4.65 | 5.85   | 7.9  | 1.1 | 9.4  | 12 (100%) | 0 (0%) | -6.3 | 15.22 | -4.5 | -2.1   | -0.7  | -53.5 | 4.2 |  |

Executed script: \\SDS-SERVER2\SAS\$\SDS3\Projects\STATISTICS DRUG DEV\NBMI4011 - CTI002\Analyser\Script\SAS\T\_cat001.sas, on: 23MAY2016:14:00, by: maria.lidsell  
Version of source data: nbmi\_neu.sas7bdat, last modified: 24FEB16:23:13, status: Final

Table DE5.6.1 Change from baseline of NMB, Tremor test, Right hand, Standard Deviation (Full analysis set)

| Treatment        | Visit            | Result      |             | Change from baseline (Visit day 1) |      |      |        |     |     |     |             |             |      |      |       |        |     |      |      |  |
|------------------|------------------|-------------|-------------|------------------------------------|------|------|--------|-----|-----|-----|-------------|-------------|------|------|-------|--------|-----|------|------|--|
|                  |                  | n           | nmiss       | Mean                               | SD   | Q1   | Median | Q3  | Min | Max | n           | nmiss       | Mean | SD   | Q1    | Median | Q3  | Min  | Max  |  |
| Total (n=36)     | Visit day 1      | 26 (72.22%) | 10 (27.78%) | 3.1                                | 0.82 | 2.7  | 2.9    | 3.4 | 1   | 5.1 |             |             |      |      |       |        |     |      |      |  |
|                  | Follow-up day 15 | 23 (63.89%) | 13 (36.11%) | 4.2                                | 5.07 | 2.9  | 3.2    | 3.9 | 0.2 | 27  | 22 (61.11%) | 14 (38.89%) | 1.3  | 5.17 | -0.3  | 0.25   | 0.9 | -2.2 | 24.1 |  |
|                  | Follow-up day 45 | 4 (11.11%)  | 32 (88.89%) | 3.4                                | 0.46 | 3.05 | 3.45   | 3.8 | 2.9 | 3.9 | 4 (11.11%)  | 32 (88.89%) | 0.2  | 0.72 | -0.35 | 0.4    | 0.8 | -0.7 | 0.8  |  |
| NBMI100mg (n=13) | Visit day 1      | 10 (76.92%) | 3 (23.08%)  | 2.9                                | 0.72 | 2.4  | 2.7    | 3.2 | 2.2 | 4.6 |             |             |      |      |       |        |     |      |      |  |
|                  | Follow-up day 15 | 9 (69.23%)  | 4 (30.77%)  | 2.9                                | 0.68 | 2.7  | 2.9    | 2.9 | 2   | 4.4 | 9 (69.23%)  | 4 (30.77%)  | 0    | 0.52 | -0.3  | 0      | 0.3 | -1   | 0.7  |  |
|                  | Follow-up day 45 | 3 (23.08%)  | 10 (76.92%) | 3.6                                | 0.36 | 3.2  | 3.7    | 3.9 | 3.2 | 3.9 | 3 (23.08%)  | 10 (76.92%) | 0.3  | 0.87 | -0.7  | 0.8    | 0.8 | -0.7 | 0.8  |  |
| NBMI300mg (n=11) | Visit day 1      | 7 (63.64%)  | 4 (36.36%)  | 3.2                                | 1.28 | 2.7  | 3.2    | 4.2 | 1   | 5.1 |             |             |      |      |       |        |     |      |      |  |
|                  | Follow-up day 15 | 7 (63.64%)  | 4 (36.36%)  | 3.5                                | 0.81 | 3.2  | 3.4    | 3.9 | 2   | 4.6 | 7 (63.64%)  | 4 (36.36%)  | 0.3  | 1.38 | -0.5  | 0.5    | 1.2 | -2.2 | 2.2  |  |
|                  | Follow-up day 45 | 0 (0%)      | 11 (100%)   |                                    |      |      |        |     |     |     | 0 (0%)      | 11 (100%)   |      |      |       |        |     |      |      |  |
| Placebo (n=12)   | Visit day 1      | 9 (75%)     | 3 (25%)     | 3.2                                | 0.43 | 2.9  | 3.2    | 3.4 | 2.4 | 3.7 |             |             |      |      |       |        |     |      |      |  |
|                  | Follow-up day 15 | 7 (58.33%)  | 5 (41.67%)  | 6.6                                | 9.1  | 2.9  | 3.9    | 4.6 | 0.2 | 27  | 6 (50%)     | 6 (50%)     | 4.6  | 9.57 | 0     | 1.2    | 1.5 | -0.3 | 24.1 |  |
|                  | Follow-up day 45 | 1 (8.33%)   | 11 (91.67%) | 2.9                                |      | 2.9  | 2.9    | 2.9 | 2.9 | 2.9 | 1 (8.33%)   | 11 (91.67%) | 0    |      | 0     | 0      | 0   | 0    | 0    |  |

Executed script: \\SDS-SERVER2\SAS\$\SDS3\Projects\STATISTICS DRUG DEV\NBMI4011 - CTI002\Analyser\Script\SAS\T\_cat001.sas, on: 23MAY2016:14:00, by: maria.lidsell  
Version of source data: nbmi\_neu.sas7bdat, last modified: 24FEB16:23:13, status: Final

Table DE5.7.1 Change from baseline of NMB, Tremor test, Right hand, Harmonic Index (Full analysis set)

| Treatment        | Visit            | Result    |        | Change from baseline (Visit day 1) |      |       |        |       |      |      |           |        |      |      |        |        |       |       |      |  |
|------------------|------------------|-----------|--------|------------------------------------|------|-------|--------|-------|------|------|-----------|--------|------|------|--------|--------|-------|-------|------|--|
|                  |                  | n         | nmiss  | Mean                               | SD   | Q1    | Median | Q3    | Min  | Max  | n         | nmiss  | Mean | SD   | Q1     | Median | Q3    | Min   | Max  |  |
| Total (n=36)     | Visit day 1      | 36 (100%) | 0 (0%) | 0.9                                | 0.06 | 0.81  | 0.875  | 0.905 | 0.73 | 0.95 |           |        |      |      |        |        |       |       |      |  |
|                  | Follow-up day 15 | 36 (100%) | 0 (0%) | 0.9                                | 0.06 | 0.82  | 0.87   | 0.905 | 0.69 | 0.97 | 36 (100%) | 0 (0%) | 0    | 0.08 | -0.04  | -0.005 | 0.05  | -0.22 | 0.16 |  |
|                  | Follow-up day 45 | 36 (100%) | 0 (0%) | 0.9                                | 0.07 | 0.825 | 0.885  | 0.925 | 0.7  | 0.97 | 36 (100%) | 0 (0%) | 0    | 0.07 | -0.05  | 0      | 0.065 | -0.1  | 0.18 |  |
| NBMI100mg (n=13) | Visit day 1      | 13 (100%) | 0 (0%) | 0.9                                | 0.05 | 0.88  | 0.9    | 0.92  | 0.79 | 0.95 |           |        |      |      |        |        |       |       |      |  |
|                  | Follow-up day 15 | 13 (100%) | 0 (0%) | 0.9                                | 0.06 | 0.84  | 0.88   | 0.91  | 0.77 | 0.95 | 13 (100%) | 0 (0%) | 0    | 0.07 | -0.04  | -0.01  | 0     | -0.13 | 0.12 |  |
|                  | Follow-up day 45 | 13 (100%) | 0 (0%) | 0.9                                | 0.07 | 0.83  | 0.88   | 0.91  | 0.7  | 0.96 | 13 (100%) | 0 (0%) | 0    | 0.05 | -0.06  | -0.03  | 0     | -0.09 | 0.08 |  |
| NBMI300mg (n=11) | Visit day 1      | 11 (100%) | 0 (0%) | 0.8                                | 0.07 | 0.77  | 0.84   | 0.89  | 0.73 | 0.93 |           |        |      |      |        |        |       |       |      |  |
|                  | Follow-up day 15 | 11 (100%) | 0 (0%) | 0.8                                | 0.06 | 0.78  | 0.85   | 0.88  | 0.75 | 0.94 | 11 (100%) | 0 (0%) | 0    | 0.06 | -0.04  | 0.01   | 0.05  | -0.07 | 0.1  |  |
|                  | Follow-up day 45 | 11 (100%) | 0 (0%) | 0.9                                | 0.09 | 0.78  | 0.86   | 0.95  | 0.74 | 0.97 | 11 (100%) | 0 (0%) | 0    | 0.08 | -0.07  | 0.05   | 0.09  | -0.1  | 0.17 |  |
| Placebo (n=12)   | Visit day 1      | 12 (100%) | 0 (0%) | 0.8                                | 0.05 | 0.805 | 0.845  | 0.88  | 0.74 | 0.91 |           |        |      |      |        |        |       |       |      |  |
|                  | Follow-up day 15 | 12 (100%) | 0 (0%) | 0.9                                | 0.08 | 0.825 | 0.86   | 0.915 | 0.69 | 0.97 | 12 (100%) | 0 (0%) | 0    | 0.1  | -0.03  | 0.03   | 0.09  | -0.22 | 0.16 |  |
|                  | Follow-up day 45 | 12 (100%) | 0 (0%) | 0.9                                | 0.06 | 0.845 | 0.89   | 0.925 | 0.78 | 0.97 | 12 (100%) | 0 (0%) | 0    | 0.07 | -0.005 | 0.025  | 0.095 | -0.06 | 0.18 |  |

Executed script: \\SDS-SERVER2\SAS\$\SDS3\Projects\STATISTICS DRUG DEV\NBMI4011 - CTI002\Analyser\Script\SAS\T\_cat001.sas, on: 23MAY2016:14:00, by: maria.lidsell  
Version of source data: nbmi\_neu.sas7bdat, last modified: 24FEB16:23:13, status: Final

Table DE5.8.1 Change from baseline of NMB, Tremor test, Right hand, Tremor Index (Full analysis set)

| Treatment        | Visit            | Result    |        | Change from baseline (Visit day 1) |       |      |        |      |     |     |           |        |       |       |     |        |      |     |     |  |
|------------------|------------------|-----------|--------|------------------------------------|-------|------|--------|------|-----|-----|-----------|--------|-------|-------|-----|--------|------|-----|-----|--|
|                  |                  | n         | nmiss  | Mean                               | SD    | Q1   | Median | Q3   | Min | Max | n         | nmiss  | Mean  | SD    | Q1  | Median | Q3   | Min | Max |  |
| Total (n=36)     | Visit day 1      | 36 (100%) | 0 (0%) | 42.3                               | 14.63 | 30   | 44.5   | 53.5 | 11  | 71  |           |        |       |       |     |        |      |     |     |  |
|                  | Follow-up day 15 | 36 (100%) | 0 (0%) | 39.9                               | 17.39 | 28   | 40     | 53.5 | 5   | 77  | 36 (100%) | 0 (0%) | -2.4  | 19.37 | -12 | 1      | 15   | -48 | 24  |  |
|                  | Follow-up day 45 | 36 (100%) | 0 (0%) | 36.8                               | 20.23 | 24.5 | 34.5   | 54.5 | 5   | 72  | 36 (100%) | 0 (0%) | -5.5  | 23    | -23 | -1.5   | 10   | -53 | 38  |  |
| NBMI100mg (n=13) | Visit day 1      | 13 (100%) | 0 (0%) | 45.2                               | 13.39 | 38   | 45     | 54   | 21  | 71  |           |        |       |       |     |        |      |     |     |  |
|                  | Follow-up day 15 | 13 (100%) | 0 (0%) | 45.7                               | 19.26 | 29   | 52     | 56   | 10  | 77  | 13 (100%) | 0 (0%) | 0.5   | 19.97 | -12 | 2      | 17   | -31 | 24  |  |
|                  | Follow-up day 45 | 13 (100%) | 0 (0%) | 41.5                               | 18.91 | 28   | 41     | 55   | 7   | 72  | 13 (100%) | 0 (0%) | -3.8  | 22.76 | -17 | -10    | 11   | -38 | 35  |  |
| NBMI300mg (n=11) | Visit day 1      | 11 (100%) | 0 (0%) | 35.2                               | 16.28 | 24   | 30     | 49   | 11  | 60  |           |        |       |       |     |        |      |     |     |  |
|                  | Follow-up day 15 | 11 (100%) | 0 (0%) | 40.2                               | 12.82 | 32   | 40     | 50   | 17  | 61  | 11 (100%) | 0 (0%) | 5     | 12.85 | 1   | 5      | 10   | -24 | 24  |  |
|                  | Follow-up day 45 | 11 (100%) | 0 (0%) | 29.5                               | 19.01 | 7    | 27     | 49   | 5   | 57  | 11 (100%) | 0 (0%) | -5.7  | 25.31 | -30 | 4      | 8    | -53 | 38  |  |
| Placebo (n=12)   | Visit day 1      | 12 (100%) | 0 (0%) | 45.8                               | 13.07 | 36   | 49     | 54.5 | 25  | 68  |           |        |       |       |     |        |      |     |     |  |
|                  | Follow-up day 15 | 12 (100%) | 0 (0%) | 33.5                               | 17.99 | 26   | 30.5   | 43   | 5   | 70  | 12 (100%) | 0 (0%) | -12.3 | 20.93 | -31 | -7.5   | 0    | -48 | 19  |  |
|                  | Follow-up day 45 | 12 (100%) | 0 (0%) | 38.5                               | 22.37 | 25.5 | 31     | 61.5 | 6   | 70  | 12 (100%) | 0 (0%) | -7.3  | 23    | -28 | -3     | 11.5 | -42 | 30  |  |

Executed script: \\SDS-SERVER2\SAS\$\SDS3\Projects\STATISTICS DRUG DEV\NBMI4011 - CTI002\Analyser\Script\SAS\T\_cat001.sas, on: 23MAY2016:14:00, by: maria.lidsell  
Version of source data: nbmi\_neu.sas7bdat, last modified: 24FEB16:23:13, status: Final

Table DE5.9.1 Change from baseline of NMB, Tremor test, Left hand, Tremor Intensity (Full analysis set)

| Treatment        | Visit            | Result    |        | Change from baseline (Visit day 1) |      |       |        |       |      |      |           |        |      |      |        |        |       |       |      |
|------------------|------------------|-----------|--------|------------------------------------|------|-------|--------|-------|------|------|-----------|--------|------|------|--------|--------|-------|-------|------|
|                  |                  | n         | nmiss  | Mean                               | SD   | Q1    | Median | Q3    | Min  | Max  | n         | nmiss  | Mean | SD   | Q1     | Median | Q3    | Min   | Max  |
| Total (n=36)     | Visit day 1      | 36 (100%) | 0 (0%) | 0.1                                | 0.07 | 0.07  | 0.085  | 0.11  | 0.05 | 0.5  |           |        |      |      |        |        |       |       |      |
|                  | Follow-up day 15 | 36 (100%) | 0 (0%) | 0.2                                | 0.49 | 0.07  | 0.09   | 0.12  | 0.06 | 3.03 | 36 (100%) | 0 (0%) | 0.1  | 0.49 | -0.01  | 0.005  | 0.02  | -0.22 | 2.92 |
|                  | Follow-up day 45 | 36 (100%) | 0 (0%) | 0.4                                | 0.66 | 0.08  | 0.12   | 0.175 | 0.05 | 2.83 | 36 (100%) | 0 (0%) | 0.3  | 0.66 | 0      | 0.02   | 0.085 | -0.37 | 2.71 |
| NBMI100mg (n=13) | Visit day 1      | 13 (100%) | 0 (0%) | 0.1                                | 0.03 | 0.07  | 0.08   | 0.11  | 0.05 | 0.15 |           |        |      |      |        |        |       |       |      |
|                  | Follow-up day 15 | 13 (100%) | 0 (0%) | 0.1                                | 0.02 | 0.07  | 0.07   | 0.09  | 0.06 | 0.13 | 13 (100%) | 0 (0%) | 0    | 0.03 | -0.03  | -0.01  | 0.01  | -0.06 | 0.05 |
|                  | Follow-up day 45 | 13 (100%) | 0 (0%) | 0.4                                | 0.77 | 0.08  | 0.09   | 0.13  | 0.05 | 2.83 | 13 (100%) | 0 (0%) | 0.3  | 0.76 | 0      | 0.01   | 0.04  | -0.03 | 2.71 |
| NBMI300mg (n=11) | Visit day 1      | 11 (100%) | 0 (0%) | 0.1                                | 0.13 | 0.07  | 0.08   | 0.11  | 0.06 | 0.5  |           |        |      |      |        |        |       |       |      |
|                  | Follow-up day 15 | 11 (100%) | 0 (0%) | 0.1                                | 0.07 | 0.08  | 0.09   | 0.11  | 0.06 | 0.28 | 11 (100%) | 0 (0%) | 0    | 0.07 | -0.01  | 0.01   | 0.02  | -0.22 | 0.06 |
|                  | Follow-up day 45 | 11 (100%) | 0 (0%) | 0.3                                | 0.36 | 0.08  | 0.13   | 0.25  | 0.08 | 1.13 | 11 (100%) | 0 (0%) | 0.2  | 0.4  | 0      | 0.02   | 0.17  | -0.37 | 1.07 |
| Placebo (n=12)   | Visit day 1      | 12 (100%) | 0 (0%) | 0.1                                | 0.03 | 0.075 | 0.09   | 0.125 | 0.06 | 0.15 |           |        |      |      |        |        |       |       |      |
|                  | Follow-up day 15 | 12 (100%) | 0 (0%) | 0.4                                | 0.84 | 0.08  | 0.12   | 0.165 | 0.06 | 3.03 | 12 (100%) | 0 (0%) | 0.3  | 0.84 | 0      | 0.01   | 0.04  | -0.01 | 2.92 |
|                  | Follow-up day 45 | 12 (100%) | 0 (0%) | 0.4                                | 0.77 | 0.09  | 0.13   | 0.185 | 0.06 | 2.7  | 12 (100%) | 0 (0%) | 0.3  | 0.76 | -0.005 | 0.045  | 0.085 | -0.04 | 2.59 |

Executed script: \\SDS-SERVER2\SAS\$\SDS3\Projects\STATISTICS DRUG DEV\NBMI4011 - CTI002\Analyser\Script\SAS\T\_cat001.sas, on: 23MAY2016:14:00, by: maria.lidsell  
Version of source data: nbmi\_neu.sas7bdat, last modified: 24FEB16:23:13, status: Final

Table DE5.10.1 Change from baseline of NMB, Tremor test, Left hand, Centre Frequency (Full analysis set)

| Treatment        | Visit            | Result    |        |      |      |     |        |      |     |      | Change from baseline (Visit day 1) |        |      |      |       |        |      |      |     |
|------------------|------------------|-----------|--------|------|------|-----|--------|------|-----|------|------------------------------------|--------|------|------|-------|--------|------|------|-----|
|                  |                  | n         | nmiss  | Mean | SD   | Q1  | Median | Q3   | Min | Max  | n                                  | nmiss  | Mean | SD   | Q1    | Median | Q3   | Min  | Max |
| Total (n=36)     | Visit day 1      | 36 (100%) | 0 (0%) | 7.4  | 1.61 | 6   | 7.7    | 8.55 | 4.5 | 10.6 |                                    |        |      |      |       |        |      |      |     |
|                  | Follow-up day 15 | 36 (100%) | 0 (0%) | 7    | 1.96 | 6   | 7.2    | 8.3  | 1.8 | 10.9 | 36 (100%)                          | 0 (0%) | -0.4 | 2.05 | -1.7  | 0      | 1.1  | -6.6 | 3.2 |
|                  | Follow-up day 45 | 36 (100%) | 0 (0%) | 6.7  | 2.79 | 5   | 7      | 8.8  | 0.9 | 12.3 | 36 (100%)                          | 0 (0%) | -0.8 | 3.04 | -2.3  | -0.4   | 1.1  | -7.5 | 6.1 |
| NBMI100mg (n=13) | Visit day 1      | 13 (100%) | 0 (0%) | 7.2  | 1.24 | 6   | 7.2    | 7.9  | 5.5 | 9.6  |                                    |        |      |      |       |        |      |      |     |
|                  | Follow-up day 15 | 13 (100%) | 0 (0%) | 7.4  | 1.33 | 7.2 | 7.4    | 8.2  | 4.3 | 9.4  | 13 (100%)                          | 0 (0%) | 0.2  | 1.88 | -0.5  | 0.2    | 1.4  | -3.6 | 3.2 |
|                  | Follow-up day 45 | 13 (100%) | 0 (0%) | 6.6  | 2.77 | 6   | 6.7    | 7.4  | 0.9 | 12.3 | 13 (100%)                          | 0 (0%) | -0.5 | 3.06 | -1.7  | -0.3   | 1.2  | -5.6 | 6.1 |
| NBMI300mg (n=11) | Visit day 1      | 11 (100%) | 0 (0%) | 7.5  | 1.64 | 5.7 | 7.9    | 8.4  | 5   | 10.1 |                                    |        |      |      |       |        |      |      |     |
|                  | Follow-up day 15 | 11 (100%) | 0 (0%) | 7.4  | 1.71 | 6.2 | 7.4    | 8.4  | 4.5 | 10.4 | 11 (100%)                          | 0 (0%) | -0.2 | 1.28 | -1.3  | -0.2   | 0.8  | -2   | 2   |
|                  | Follow-up day 45 | 11 (100%) | 0 (0%) | 6.6  | 2.67 | 4.3 | 7      | 8.9  | 2.6 | 9.9  | 11 (100%)                          | 0 (0%) | -1   | 2.63 | -2.6  | -1.2   | 1    | -6.1 | 3.9 |
| Placebo (n=12)   | Visit day 1      | 12 (100%) | 0 (0%) | 7.6  | 2.01 | 6   | 7.45   | 9.15 | 4.5 | 10.6 |                                    |        |      |      |       |        |      |      |     |
|                  | Follow-up day 15 | 12 (100%) | 0 (0%) | 6.4  | 2.62 | 4.8 | 6.35   | 7.95 | 1.8 | 10.9 | 12 (100%)                          | 0 (0%) | -1.2 | 2.61 | -3.15 | -0.85  | 0.75 | -6.6 | 2.2 |
|                  | Follow-up day 45 | 12 (100%) | 0 (0%) | 6.8  | 3.14 | 4.9 | 7.2    | 9.25 | 0.9 | 11.8 | 12 (100%)                          | 0 (0%) | -0.8 | 3.58 | -3.3  | 0.25   | 1.05 | -7.5 | 5.3 |

Executed script: \\SDS-SERVER2\SAS\$\SDS3\Projects\STATISTICS DRUG DEV\NBMI4011 - CTI002\Analyser\Script\SAS\T\_cat001.sas, on: 23MAY2016:14:00, by: maria.lidsell  
Version of source data: nbmi\_neu.sas7bdat, last modified: 24FEB16:23:13, status: Final



Table DE5.11.1 Change from baseline of NMB, Tremor test, Left hand, Standard Deviation (Full analysis set)

| Treatment        | Visit            | Result      |             | Change from baseline (Visit day 1) |      |     |        |      |     |     |             |             |      |      |      |        |      |      |     |  |
|------------------|------------------|-------------|-------------|------------------------------------|------|-----|--------|------|-----|-----|-------------|-------------|------|------|------|--------|------|------|-----|--|
|                  |                  | n           | nmiss       | Mean                               | SD   | Q1  | Median | Q3   | Min | Max | n           | nmiss       | Mean | SD   | Q1   | Median | Q3   | Min  | Max |  |
| Total (n=36)     | Visit day 1      | 26 (72.22%) | 10 (27.78%) | 3.3                                | 0.96 | 2.7 | 3.4    | 3.9  | 0.7 | 4.9 |             |             |      |      |      |        |      |      |     |  |
|                  | Follow-up day 15 | 23 (63.89%) | 13 (36.11%) | 3.7                                | 0.94 | 3.2 | 3.4    | 4.2  | 1.5 | 5.6 | 22 (61.11%) | 14 (38.89%) | 0.3  | 1.27 | -0.5 | 0.3    | 0.8  | -2.9 | 2.5 |  |
|                  | Follow-up day 45 | 4 (11.11%)  | 32 (88.89%) | 3.6                                | 0.48 | 3.2 | 3.45   | 3.95 | 3.2 | 4.2 | 4 (11.11%)  | 32 (88.89%) | 1    | 0.89 | 0.3  | 1.15   | 1.65 | -0.2 | 1.8 |  |
| NBMI100mg (n=13) | Visit day 1      | 10 (76.92%) | 3 (23.08%)  | 3.3                                | 0.98 | 2.4 | 3.55   | 3.9  | 1.7 | 4.9 |             |             |      |      |      |        |      |      |     |  |
|                  | Follow-up day 15 | 9 (69.23%)  | 4 (30.77%)  | 4.1                                | 0.59 | 3.4 | 4.2    | 4.4  | 3.2 | 4.9 | 9 (69.23%)  | 4 (30.77%)  | 0.8  | 1.28 | 0.4  | 0.8    | 1.8  | -1.5 | 2.5 |  |
|                  | Follow-up day 45 | 3 (23.08%)  | 10 (76.92%) | 3.4                                | 0.29 | 3.2 | 3.2    | 3.7  | 3.2 | 3.7 | 3 (23.08%)  | 10 (76.92%) | 0.7  | 0.85 | -0.2 | 0.8    | 1.5  | -0.2 | 1.5 |  |
| NBMI300mg (n=11) | Visit day 1      | 7 (63.64%)  | 4 (36.36%)  | 3.3                                | 1.28 | 2.9 | 3.4    | 4.2  | 0.7 | 4.6 |             |             |      |      |      |        |      |      |     |  |
|                  | Follow-up day 15 | 7 (63.64%)  | 4 (36.36%)  | 3.7                                | 1.24 | 3.2 | 3.7    | 4.2  | 1.5 | 5.6 | 7 (63.64%)  | 4 (36.36%)  | 0.4  | 0.96 | -0.4 | 0      | 0.8  | -0.5 | 2.2 |  |
|                  | Follow-up day 45 | 0 (0%)      | 11 (100%)   |                                    |      |     |        |      |     |     | 0 (0%)      | 11 (100%)   |      |      |      |        |      |      |     |  |
| Placebo (n=12)   | Visit day 1      | 9 (75%)     | 3 (25%)     | 3.4                                | 0.76 | 2.7 | 3.4    | 3.9  | 2.4 | 4.6 |             |             |      |      |      |        |      |      |     |  |
|                  | Follow-up day 15 | 7 (58.33%)  | 5 (41.67%)  | 3.1                                | 0.8  | 2.9 | 3.2    | 3.4  | 1.7 | 4.4 | 6 (50%)     | 6 (50%)     | -0.6 | 1.28 | -1   | -0.35  | 0.2  | -2.9 | 0.7 |  |
|                  | Follow-up day 45 | 1 (8.33%)   | 11 (91.67%) | 4.2                                |      | 4.2 | 4.2    | 4.2  | 4.2 | 4.2 | 1 (8.33%)   | 11 (91.67%) | 1.8  |      | 1.8  | 1.8    | 1.8  | 1.8  | 1.8 |  |

Executed script: \\SDS-SERVER2\SAS\$\SDS3\Projects\STATISTICS DRUG DEV\NBMI4011 - CTI002\Analyser\Script\SAS\T\_cat001.sas, on: 23MAY2016:14:00, by: maria.lidsell  
Version of source data: nbmi\_neu.sas7bdat, last modified: 24FEB16:23:13, status: Final

Table DE5.12.1 Change from baseline of NMB, Tremor test, Left hand, Harmonic Index (Full analysis set)

| Treatment        | Visit            | Result    |        | Change from baseline (Visit day 1) |      |       |        |       |      |      |           |        |      |      |        |        |       |       |      |  |
|------------------|------------------|-----------|--------|------------------------------------|------|-------|--------|-------|------|------|-----------|--------|------|------|--------|--------|-------|-------|------|--|
|                  |                  | n         | nmiss  | Mean                               | SD   | Q1    | Median | Q3    | Min  | Max  | n         | nmiss  | Mean | SD   | Q1     | Median | Q3    | Min   | Max  |  |
| Total (n=36)     | Visit day 1      | 36 (100%) | 0 (0%) | 0.8                                | 0.05 | 0.79  | 0.83   | 0.86  | 0.75 | 0.97 |           |        |      |      |        |        |       |       |      |  |
|                  | Follow-up day 15 | 36 (100%) | 0 (0%) | 0.8                                | 0.06 | 0.77  | 0.82   | 0.87  | 0.68 | 0.95 | 36 (100%) | 0 (0%) | 0    | 0.08 | -0.07  | -0.005 | 0.05  | -0.16 | 0.17 |  |
|                  | Follow-up day 45 | 36 (100%) | 0 (0%) | 0.9                                | 0.06 | 0.815 | 0.855  | 0.89  | 0.74 | 0.98 | 36 (100%) | 0 (0%) | 0    | 0.09 | -0.035 | 0.035  | 0.09  | -0.14 | 0.22 |  |
| NBMI100mg (n=13) | Visit day 1      | 13 (100%) | 0 (0%) | 0.8                                | 0.05 | 0.78  | 0.81   | 0.86  | 0.77 | 0.91 |           |        |      |      |        |        |       |       |      |  |
|                  | Follow-up day 15 | 13 (100%) | 0 (0%) | 0.8                                | 0.06 | 0.77  | 0.81   | 0.86  | 0.71 | 0.92 | 13 (100%) | 0 (0%) | 0    | 0.08 | -0.08  | 0      | 0.03  | -0.13 | 0.11 |  |
|                  | Follow-up day 45 | 13 (100%) | 0 (0%) | 0.9                                | 0.06 | 0.81  | 0.84   | 0.88  | 0.77 | 0.98 | 13 (100%) | 0 (0%) | 0    | 0.09 | -0.04  | 0.04   | 0.1   | -0.11 | 0.15 |  |
| NBMI300mg (n=11) | Visit day 1      | 11 (100%) | 0 (0%) | 0.8                                | 0.05 | 0.79  | 0.83   | 0.87  | 0.78 | 0.97 |           |        |      |      |        |        |       |       |      |  |
|                  | Follow-up day 15 | 11 (100%) | 0 (0%) | 0.8                                | 0.05 | 0.8   | 0.82   | 0.87  | 0.76 | 0.91 | 11 (100%) | 0 (0%) | 0    | 0.06 | -0.06  | -0.03  | 0.03  | -0.08 | 0.1  |  |
|                  | Follow-up day 45 | 11 (100%) | 0 (0%) | 0.9                                | 0.06 | 0.82  | 0.85   | 0.89  | 0.76 | 0.94 | 11 (100%) | 0 (0%) | 0    | 0.08 | -0.03  | 0.01   | 0.08  | -0.11 | 0.15 |  |
| Placebo (n=12)   | Visit day 1      | 12 (100%) | 0 (0%) | 0.8                                | 0.04 | 0.815 | 0.84   | 0.855 | 0.75 | 0.9  |           |        |      |      |        |        |       |       |      |  |
|                  | Follow-up day 15 | 12 (100%) | 0 (0%) | 0.8                                | 0.08 | 0.77  | 0.84   | 0.895 | 0.68 | 0.95 | 12 (100%) | 0 (0%) | 0    | 0.11 | -0.08  | 0.01   | 0.075 | -0.16 | 0.17 |  |
|                  | Follow-up day 45 | 12 (100%) | 0 (0%) | 0.9                                | 0.07 | 0.815 | 0.875  | 0.91  | 0.74 | 0.97 | 12 (100%) | 0 (0%) | 0    | 0.1  | -0.04  | 0.045  | 0.09  | -0.14 | 0.22 |  |

Executed script: \\SDS-SERVER2\SAS\$\SDS3\Projects\STATISTICS DRUG DEV\NBMI4011 - CTI002\Analyser\Script\SAS\T\_cat001.sas, on: 23MAY2016:14:00, by: maria.lidsell  
Version of source data: nbmi\_neu.sas7bdat, last modified: 24FEB16:23:13, status: Final

Table DE5.13.1 Change from baseline of NMB, Tremor test, Left hand, Tremor Index (Full analysis set)

| Treatment        | Visit            | Result    |        |      |       |      |        |      |     |     | Change from baseline (Visit day 1) |        |      |       |       |        |      |     |     |
|------------------|------------------|-----------|--------|------|-------|------|--------|------|-----|-----|------------------------------------|--------|------|-------|-------|--------|------|-----|-----|
|                  |                  | n         | nmiss  | Mean | SD    | Q1   | Median | Q3   | Min | Max | n                                  | nmiss  | Mean | SD    | Q1    | Median | Q3   | Min | Max |
| Total (n=36)     | Visit day 1      | 36 (100%) | 0 (0%) | 41   | 13.47 | 32.5 | 40     | 51   | 11  | 65  |                                    |        |      |       |       |        |      |     |     |
|                  | Follow-up day 15 | 36 (100%) | 0 (0%) | 37.8 | 13.7  | 28.5 | 36     | 47   | 11  | 65  | 36 (100%)                          | 0 (0%) | -3.2 | 18.34 | -15   | -5.5   | 4    | -33 | 44  |
|                  | Follow-up day 45 | 36 (100%) | 0 (0%) | 35.7 | 17.34 | 27   | 41     | 46.5 | 2   | 65  | 36 (100%)                          | 0 (0%) | -5.3 | 23.3  | -24.5 | -8     | 14   | -59 | 51  |
| NBMI100mg (n=13) | Visit day 1      | 13 (100%) | 0 (0%) | 41.1 | 14.04 | 31   | 40     | 51   | 21  | 64  |                                    |        |      |       |       |        |      |     |     |
|                  | Follow-up day 15 | 13 (100%) | 0 (0%) | 41.3 | 12.71 | 32   | 43     | 51   | 22  | 65  | 13 (100%)                          | 0 (0%) | 0.2  | 19.79 | -10   | -3     | 9    | -33 | 44  |
|                  | Follow-up day 45 | 13 (100%) | 0 (0%) | 36.5 | 17.28 | 28   | 41     | 46   | 2   | 61  | 13 (100%)                          | 0 (0%) | -4.5 | 25.19 | -18   | -12    | 14   | -59 | 34  |
| NBMI300mg (n=11) | Visit day 1      | 11 (100%) | 0 (0%) | 39   | 16.74 | 28   | 37     | 51   | 11  | 65  |                                    |        |      |       |       |        |      |     |     |
|                  | Follow-up day 15 | 11 (100%) | 0 (0%) | 38.2 | 13.37 | 30   | 36     | 46   | 20  | 64  | 11 (100%)                          | 0 (0%) | -0.8 | 19.41 | -15   | -6     | 19   | -30 | 36  |
|                  | Follow-up day 45 | 11 (100%) | 0 (0%) | 36.7 | 18.95 | 20   | 41     | 47   | 8   | 65  | 11 (100%)                          | 0 (0%) | -2.3 | 24.47 | -25   | -7     | 14   | -29 | 51  |
| Placebo (n=12)   | Visit day 1      | 12 (100%) | 0 (0%) | 42.7 | 10    | 36   | 41     | 50.5 | 26  | 59  |                                    |        |      |       |       |        |      |     |     |
|                  | Follow-up day 15 | 12 (100%) | 0 (0%) | 33.6 | 14.98 | 23.5 | 31     | 43   | 11  | 65  | 12 (100%)                          | 0 (0%) | -9.1 | 15.61 | -19   | -9.5   | -2.5 | -32 | 29  |
|                  | Follow-up day 45 | 12 (100%) | 0 (0%) | 33.8 | 17.26 | 20.5 | 39.5   | 47.5 | 3   | 54  | 12 (100%)                          | 0 (0%) | -8.9 | 21.61 | -31   | -8     | 13.5 | -40 | 18  |

Executed script: \\SDS-SERVER2\SAS\$\SDS3\Projects\STATISTICS DRUG DEV\NBMI4011 - CTI002\Analyser\Script\SAS\T\_cat001.sas, on: 23MAY2016:14:00, by: maria.lidsell  
Version of source data: nbmi\_neu.sas7bdat, last modified: 24FEB16:23:13, status: Final

Table DE5.14.1 Change from baseline of NMB, Sway test, Mean-Sway (Full analysis set)

| Treatment        | Visit            | Result    |        |      |       |      |        |      |     |      | Change from baseline (Visit day 1) |        |      |       |       |        |      |      |      |
|------------------|------------------|-----------|--------|------|-------|------|--------|------|-----|------|------------------------------------|--------|------|-------|-------|--------|------|------|------|
|                  |                  | n         | nmiss  | Mean | SD    | Q1   | Median | Q3   | Min | Max  | n                                  | nmiss  | Mean | SD    | Q1    | Median | Q3   | Min  | Max  |
| Total (n=36)     | Visit day 1      | 36 (100%) | 0 (0%) | 4.5  | 1.49  | 3.9  | 4.4    | 5.3  | 0.7 | 7.3  |                                    |        |      |       |       |        |      |      |      |
|                  | Follow-up day 15 | 36 (100%) | 0 (0%) | 6.1  | 10.62 | 3.3  | 4.5    | 5.6  | 0.7 | 67   | 36 (100%)                          | 0 (0%) | 1.6  | 10.67 | -0.9  | 0.2    | 1    | -5.6 | 62.2 |
|                  | Follow-up day 45 | 36 (100%) | 0 (0%) | 5.2  | 2.39  | 3.9  | 5.15   | 5.85 | 0.5 | 14.4 | 36 (100%)                          | 0 (0%) | 0.7  | 2.11  | -0.75 | 0.3    | 1.7  | -3.9 | 8.2  |
| NBMI100mg (n=13) | Visit day 1      | 13 (100%) | 0 (0%) | 4.5  | 1.18  | 3.9  | 4.4    | 4.8  | 2.8 | 6.6  |                                    |        |      |       |       |        |      |      |      |
|                  | Follow-up day 15 | 13 (100%) | 0 (0%) | 8.6  | 17.64 | 3    | 3.7    | 4.7  | 0.7 | 67   | 13 (100%)                          | 0 (0%) | 4    | 17.56 | -0.8  | 0.1    | 0.3  | -4.9 | 62.2 |
|                  | Follow-up day 45 | 13 (100%) | 0 (0%) | 5.3  | 3.44  | 3.2  | 4.5    | 6    | 0.5 | 14.4 | 13 (100%)                          | 0 (0%) | 0.7  | 2.77  | -0.7  | 0.3    | 1.6  | -3.9 | 8.2  |
| NBMI300mg (n=11) | Visit day 1      | 11 (100%) | 0 (0%) | 4.5  | 1.53  | 3.9  | 4.9    | 5.2  | 0.7 | 6.7  |                                    |        |      |       |       |        |      |      |      |
|                  | Follow-up day 15 | 11 (100%) | 0 (0%) | 5.2  | 2.29  | 4    | 5.4    | 6.5  | 0.9 | 8.7  | 11 (100%)                          | 0 (0%) | 0.7  | 3.15  | -1    | 0.2    | 1.7  | -4.1 | 8    |
|                  | Follow-up day 45 | 11 (100%) | 0 (0%) | 4.8  | 1.73  | 3.9  | 4.7    | 5.2  | 2.2 | 9.1  | 11 (100%)                          | 0 (0%) | 0.3  | 1.98  | -1.4  | 0.2    | 1.3  | -2   | 4.2  |
| Placebo (n=12)   | Visit day 1      | 12 (100%) | 0 (0%) | 4.5  | 1.85  | 3.65 | 4.25   | 5.85 | 0.7 | 7.3  |                                    |        |      |       |       |        |      |      |      |
|                  | Follow-up day 15 | 12 (100%) | 0 (0%) | 4.4  | 1.96  | 3.9  | 4.55   | 5.4  | 0.9 | 8.1  | 12 (100%)                          | 0 (0%) | 0    | 2.54  | -1.1  | 0.5    | 1.45 | -5.6 | 4    |
|                  | Follow-up day 45 | 12 (100%) | 0 (0%) | 5.4  | 1.54  | 5    | 5.5    | 6.2  | 1.3 | 7.3  | 12 (100%)                          | 0 (0%) | 0.9  | 1.42  | 0.05  | 0.55   | 2.45 | -1.5 | 2.7  |

Executed script: \\SDS-SERVER2\SAS\$\SDS3\Projects\STATISTICS DRUG DEV\NBMI4011 - CTI002\Analyser\Script\SAS\T\_cat001.sas, on: 23MAY2016:14:00, by: maria.lidsell  
Version of source data: nbmi\_neu.sas7bdat, last modified: 24FEB16:23:13, status: Final

Table DE5.15.1 Change from baseline of NMB, Sway test, Transversal Sway (Full analysis set)

| Treatment        | Visit            | Result    |        |      |      |      |        |     |     |     | Change from baseline (Visit day 1) |        |      |      |       |        |      |      |     |
|------------------|------------------|-----------|--------|------|------|------|--------|-----|-----|-----|------------------------------------|--------|------|------|-------|--------|------|------|-----|
|                  |                  | n         | nmiss  | Mean | SD   | Q1   | Median | Q3  | Min | Max | n                                  | nmiss  | Mean | SD   | Q1    | Median | Q3   | Min  | Max |
| Total (n=36)     | Visit day 1      | 36 (100%) | 0 (0%) | 2.4  | 0.96 | 1.8  | 2.45   | 3   | 0.3 | 4.3 |                                    |        |      |      |       |        |      |      |     |
|                  | Follow-up day 15 | 36 (100%) | 0 (0%) | 2.3  | 1.03 | 1.65 | 2.3    | 2.9 | 0.4 | 4.5 | 36 (100%)                          | 0 (0%) | 0    | 1.29 | -0.6  | -0.05  | 0.55 | -3.4 | 2.6 |
|                  | Follow-up day 45 | 36 (100%) | 0 (0%) | 2.8  | 1.65 | 1.9  | 2.2    | 3.4 | 0.3 | 9.5 | 36 (100%)                          | 0 (0%) | 0.4  | 1.5  | -0.55 | 0.4    | 1    | -2.1 | 6.4 |
| NBMI100mg (n=13) | Visit day 1      | 13 (100%) | 0 (0%) | 2.4  | 0.85 | 1.6  | 2.4    | 2.8 | 1.1 | 4.3 |                                    |        |      |      |       |        |      |      |     |
|                  | Follow-up day 15 | 13 (100%) | 0 (0%) | 2.2  | 1.17 | 1.6  | 2      | 2.7 | 0.4 | 4.4 | 13 (100%)                          | 0 (0%) | -0.1 | 1.34 | -0.7  | -0.1   | 0.2  | -3.4 | 2.2 |
|                  | Follow-up day 45 | 13 (100%) | 0 (0%) | 3.1  | 2.34 | 1.9  | 2.1    | 3.9 | 0.3 | 9.5 | 13 (100%)                          | 0 (0%) | 0.8  | 2.04 | -0.4  | 0.4    | 0.6  | -1.2 | 6.4 |
| NBMI300mg (n=11) | Visit day 1      | 11 (100%) | 0 (0%) | 2.5  | 1.01 | 1.8  | 2.6    | 3.1 | 0.4 | 4   |                                    |        |      |      |       |        |      |      |     |
|                  | Follow-up day 15 | 11 (100%) | 0 (0%) | 2.5  | 0.93 | 1.7  | 2.8    | 3.1 | 0.6 | 3.7 | 11 (100%)                          | 0 (0%) | 0.1  | 1.26 | -0.3  | 0.2    | 0.5  | -2   | 2.6 |
|                  | Follow-up day 45 | 11 (100%) | 0 (0%) | 2.4  | 1.15 | 1.8  | 2.2    | 3.1 | 1.2 | 5.2 | 11 (100%)                          | 0 (0%) | 0    | 1.35 | -0.9  | -0.3   | 0.6  | -2.1 | 2.6 |
| Placebo (n=12)   | Visit day 1      | 12 (100%) | 0 (0%) | 2.3  | 1.09 | 1.8  | 2.1    | 3   | 0.3 | 4   |                                    |        |      |      |       |        |      |      |     |
|                  | Follow-up day 15 | 12 (100%) | 0 (0%) | 2.3  | 1.03 | 1.9  | 2.25   | 2.5 | 0.5 | 4.5 | 12 (100%)                          | 0 (0%) | 0    | 1.37 | -0.6  | -0.05  | 0.85 | -3.1 | 2.2 |
|                  | Follow-up day 45 | 12 (100%) | 0 (0%) | 2.7  | 1.09 | 2.15 | 2.7    | 3.4 | 0.7 | 4.5 | 12 (100%)                          | 0 (0%) | 0.4  | 0.77 | -0.15 | 0.45   | 1.05 | -0.9 | 1.4 |

Executed script: \\SDS-SERVER2\SAS\$\SDS3\Projects\STATISTICS DRUG DEV\NBMI4011 - CTI002\Analyser\Script\SAS\T\_cat001.sas, on: 23MAY2016:14:00, by: maria.lidsell  
Version of source data: nbmi\_neu.sas7bdat, last modified: 24FEB16:23:13, status: Final

Table DE5.16.1 Change from baseline of NMB, Sway test, Sagittal Sway (Full analysis set)

| Treatment        | Visit            | Result    |        |      |      |      |        |      |     |     | Change from baseline (Visit day 1) |        |      |      |      |        |      |      |     |
|------------------|------------------|-----------|--------|------|------|------|--------|------|-----|-----|------------------------------------|--------|------|------|------|--------|------|------|-----|
|                  |                  | n         | nmiss  | Mean | SD   | Q1   | Median | Q3   | Min | Max | n                                  | nmiss  | Mean | SD   | Q1   | Median | Q3   | Min  | Max |
| Total (n=36)     | Visit day 1      | 36 (100%) | 0 (0%) | 3.3  | 1.13 | 2.75 | 3.2    | 3.85 | 0.5 | 5.4 |                                    |        |      |      |      |        |      |      |     |
|                  | Follow-up day 15 | 36 (100%) | 0 (0%) | 3.3  | 1.71 | 2.35 | 3.2    | 4.4  | 0.5 | 7.5 | 36 (100%)                          | 0 (0%) | 0    | 2.12 | -1.1 | 0.2    | 0.9  | -4   | 7   |
|                  | Follow-up day 45 | 36 (100%) | 0 (0%) | 3.7  | 1.71 | 2.5  | 3.6    | 4.4  | 0.3 | 9.4 | 36 (100%)                          | 0 (0%) | 0.4  | 1.69 | -0.6 | 0.4    | 1.4  | -3.6 | 4.6 |
| NBMI100mg (n=13) | Visit day 1      | 13 (100%) | 0 (0%) | 3.3  | 0.99 | 2.5  | 3.1    | 3.7  | 2.1 | 5.4 |                                    |        |      |      |      |        |      |      |     |
|                  | Follow-up day 15 | 13 (100%) | 0 (0%) | 2.7  | 1.36 | 2    | 2.7    | 3.8  | 0.5 | 5   | 13 (100%)                          | 0 (0%) | -0.6 | 1.31 | -0.6 | -0.4   | 0.2  | -3.1 | 0.9 |
|                  | Follow-up day 45 | 13 (100%) | 0 (0%) | 3.7  | 2.26 | 2.3  | 3.5    | 4.1  | 0.3 | 9.4 | 13 (100%)                          | 0 (0%) | 0.3  | 1.83 | -0.2 | 0.4    | 1    | -3.6 | 4.6 |
| NBMI300mg (n=11) | Visit day 1      | 11 (100%) | 0 (0%) | 3.3  | 1.18 | 3.1  | 3.2    | 3.8  | 0.5 | 5.3 |                                    |        |      |      |      |        |      |      |     |
|                  | Follow-up day 15 | 11 (100%) | 0 (0%) | 4    | 2.05 | 2.4  | 4.1    | 4.9  | 0.6 | 7.5 | 11 (100%)                          | 0 (0%) | 0.7  | 2.9  | -1.5 | 0.4    | 2.3  | -3.2 | 7   |
|                  | Follow-up day 45 | 11 (100%) | 0 (0%) | 3.6  | 1.31 | 2.8  | 3.6    | 4.2  | 1.4 | 6.4 | 11 (100%)                          | 0 (0%) | 0.4  | 1.66 | -1.7 | 0.7    | 1.8  | -1.9 | 2.8 |
| Placebo (n=12)   | Visit day 1      | 12 (100%) | 0 (0%) | 3.4  | 1.32 | 2.6  | 3.4    | 4.45 | 0.6 | 5.3 |                                    |        |      |      |      |        |      |      |     |
|                  | Follow-up day 15 | 12 (100%) | 0 (0%) | 3.3  | 1.62 | 2.8  | 3.4    | 4.1  | 0.6 | 5.9 | 12 (100%)                          | 0 (0%) | 0    | 1.96 | -1   | 0.35   | 0.9  | -4   | 2.9 |
|                  | Follow-up day 45 | 12 (100%) | 0 (0%) | 3.8  | 1.45 | 2.95 | 4.15   | 4.65 | 0.9 | 6   | 12 (100%)                          | 0 (0%) | 0.5  | 1.72 | -0.5 | 0.35   | 2.15 | -2.7 | 2.8 |

Executed script: \\SDS-SERVER2\SAS\$\SDS3\Projects\STATISTICS DRUG DEV\NBMI4011 - CTI002\Analyser\Script\SAS\T\_cat001.sas, on: 23MAY2016:14:00, by: maria.lidsell  
Version of source data: nbmi\_neu.sas7bdat, last modified: 24FEB16:23:13, status: Final

Table DE5.17.1 Change from baseline of NMB, Sway test, Sway Area (Full analysis set)

| Treatment        | Visit            | Result    |        |       |        |       |        |       |     |     | Change from baseline (Visit day 1) |        |       |        |        |        |       |      |     |
|------------------|------------------|-----------|--------|-------|--------|-------|--------|-------|-----|-----|------------------------------------|--------|-------|--------|--------|--------|-------|------|-----|
|                  |                  | n         | nmiss  | Mean  | SD     | Q1    | Median | Q3    | Min | Max | n                                  | nmiss  | Mean  | SD     | Q1     | Median | Q3    | Min  | Max |
| Total (n=36)     | Visit day 1      | 36 (100%) | 0 (0%) | 187.8 | 126.56 | 91    | 167    | 235.5 | 3   | 677 |                                    |        |       |        |        |        |       |      |     |
|                  | Follow-up day 15 | 36 (100%) | 0 (0%) | 179.8 | 122.94 | 96    | 155.5  | 240   | 4   | 508 | 36 (100%)                          | 0 (0%) | -8    | 126.33 | -48    | 0      | 71.5  | -414 | 207 |
|                  | Follow-up day 45 | 36 (100%) | 0 (0%) | 215.4 | 132.72 | 124.5 | 196.5  | 283   | 2   | 521 | 36 (100%)                          | 0 (0%) | 27.6  | 121.75 | -24    | 17     | 120.5 | -419 | 285 |
| NBMI100mg (n=13) | Visit day 1      | 13 (100%) | 0 (0%) | 181.6 | 105.76 | 89    | 161    | 226   | 79  | 433 |                                    |        |       |        |        |        |       |      |     |
|                  | Follow-up day 15 | 13 (100%) | 0 (0%) | 153   | 105.93 | 86    | 141    | 214   | 4   | 346 | 13 (100%)                          | 0 (0%) | -28.6 | 124.98 | -29    | -5     | 22    | -414 | 97  |
|                  | Follow-up day 45 | 13 (100%) | 0 (0%) | 212.8 | 164.48 | 102   | 147    | 300   | 2   | 514 | 13 (100%)                          | 0 (0%) | 31.2  | 91.03  | -24    | 17     | 68    | -87  | 207 |
| NBMI300mg (n=11) | Visit day 1      | 11 (100%) | 0 (0%) | 184.9 | 99.44  | 106   | 179    | 241   | 5   | 338 |                                    |        |       |        |        |        |       |      |     |
|                  | Follow-up day 15 | 11 (100%) | 0 (0%) | 221.5 | 134.96 | 95    | 212    | 383   | 9   | 418 | 11 (100%)                          | 0 (0%) | 36.6  | 131.69 | -46    | 62     | 146   | -226 | 207 |
|                  | Follow-up day 45 | 11 (100%) | 0 (0%) | 211.7 | 136.82 | 132   | 152    | 256   | 56  | 521 | 11 (100%)                          | 0 (0%) | 26.8  | 125.91 | -83    | -22    | 127   | -140 | 285 |
| Placebo (n=12)   | Visit day 1      | 12 (100%) | 0 (0%) | 197.2 | 172.12 | 85.5  | 166.5  | 225.5 | 3   | 677 |                                    |        |       |        |        |        |       |      |     |
|                  | Follow-up day 15 | 12 (100%) | 0 (0%) | 170.7 | 128.88 | 127.5 | 144.5  | 211.5 | 8   | 508 | 12 (100%)                          | 0 (0%) | -26.5 | 122.93 | -111.5 | -2.5   | 61.5  | -282 | 143 |
|                  | Follow-up day 45 | 12 (100%) | 0 (0%) | 221.7 | 97.21  | 188.5 | 241.5  | 283   | 13  | 350 | 12 (100%)                          | 0 (0%) | 24.5  | 153.9  | -3.5   | 50.5   | 126.5 | -419 | 142 |

Executed script: \\SDS-SERVER2\SAS\$\SDS3\Projects\STATISTICS DRUG DEV\NBMI4011 - CTI002\Analyser\Script\SAS\T\_cat001.sas, on: 23MAY2016:14:00, by: maria.lidsell  
Version of source data: nbmi\_neu.sas7bdat, last modified: 24FEB16:23:13, status: Final

Table DE5.18.1 Change from baseline of NMB, Sway test, Sway Velocity (Full analysis set)

| Treatment        | Visit            | Result    |        |      |      |      |        |      |     |      | Change from baseline (Visit day 1) |        |      |      |       |        |      |       |     |
|------------------|------------------|-----------|--------|------|------|------|--------|------|-----|------|------------------------------------|--------|------|------|-------|--------|------|-------|-----|
|                  |                  | n         | nmiss  | Mean | SD   | Q1   | Median | Q3   | Min | Max  | n                                  | nmiss  | Mean | SD   | Q1    | Median | Q3   | Min   | Max |
| Total (n=36)     | Visit day 1      | 36 (100%) | 0 (0%) | 7.7  | 2.91 | 6.05 | 7.45   | 9.1  | 1   | 16.2 |                                    |        |      |      |       |        |      |       |     |
|                  | Follow-up day 15 | 36 (100%) | 0 (0%) | 7.3  | 2.77 | 5.85 | 7.65   | 9.4  | 0.9 | 12.2 | 36 (100%)                          | 0 (0%) | -0.4 | 3.46 | -0.6  | 0.3    | 1.35 | -12.9 | 5.5 |
|                  | Follow-up day 45 | 36 (100%) | 0 (0%) | 8.2  | 2.69 | 6.8  | 8.3    | 9.75 | 1.3 | 16   | 36 (100%)                          | 0 (0%) | 0.5  | 2    | -0.35 | 0.55   | 1.75 | -5.9  | 6.5 |
| NBMI100mg (n=13) | Visit day 1      | 13 (100%) | 0 (0%) | 7.7  | 2.94 | 5.7  | 7      | 8.2  | 5.2 | 16.2 |                                    |        |      |      |       |        |      |       |     |
|                  | Follow-up day 15 | 13 (100%) | 0 (0%) | 6.8  | 2.6  | 5.9  | 6.8    | 9    | 0.9 | 9.9  | 13 (100%)                          | 0 (0%) | -0.9 | 3.93 | -0.4  | 0.1    | 0.9  | -12.9 | 2.4 |
|                  | Follow-up day 45 | 13 (100%) | 0 (0%) | 7.6  | 3.32 | 6.1  | 7.3    | 8.4  | 1.3 | 16   | 13 (100%)                          | 0 (0%) | 0    | 2.03 | -0.5  | 0.6    | 1.2  | -5.9  | 1.8 |
| NBMI300mg (n=11) | Visit day 1      | 11 (100%) | 0 (0%) | 8    | 3.19 | 5.9  | 8.2    | 9.2  | 1   | 14   |                                    |        |      |      |       |        |      |       |     |
|                  | Follow-up day 15 | 11 (100%) | 0 (0%) | 8.1  | 2.83 | 6.4  | 8.8    | 10.3 | 1.9 | 12.2 | 11 (100%)                          | 0 (0%) | 0.1  | 3.01 | -0.6  | 0.5    | 1.4  | -7.1  | 5.5 |
|                  | Follow-up day 45 | 11 (100%) | 0 (0%) | 8.7  | 1.87 | 7.5  | 8      | 10.8 | 6.1 | 11.7 | 11 (100%)                          | 0 (0%) | 0.7  | 2.45 | -1.5  | 0.1    | 2.1  | -2.3  | 6.5 |
| Placebo (n=12)   | Visit day 1      | 12 (100%) | 0 (0%) | 7.4  | 2.85 | 6.45 | 7.75   | 9.35 | 1   | 11.4 |                                    |        |      |      |       |        |      |       |     |
|                  | Follow-up day 15 | 12 (100%) | 0 (0%) | 7    | 2.93 | 5.1  | 7.45   | 9.55 | 1.9 | 10.4 | 12 (100%)                          | 0 (0%) | -0.4 | 3.51 | -1.85 | 0.45   | 1.85 | -7.4  | 4.8 |
|                  | Follow-up day 45 | 12 (100%) | 0 (0%) | 8.3  | 2.69 | 8    | 9.25   | 9.85 | 1.8 | 10.9 | 12 (100%)                          | 0 (0%) | 0.9  | 1.47 | 0.25  | 1.2    | 1.9  | -2.1  | 2.8 |

Executed script: \\SDS-SERVER2\SAS\$\SDS3\Projects\STATISTICS DRUG DEV\NBMI4011 - CTI002\Analyser\Script\SAS\T\_cat001.sas, on: 23MAY2016:14:00, by: maria.lidsell  
Version of source data: nbmi\_neu.sas7bdat, last modified: 24FEB16:23:13, status: Final



Table DE5.19.1 Change from baseline of NMB, Sway test, Sway Intensity (Full analysis set)

| Treatment        | Visit            | Result    |        | Change from baseline (Visit day 1) |      |      |        |      |     |     |           |        |      |      |       |        |      |      |      |  |
|------------------|------------------|-----------|--------|------------------------------------|------|------|--------|------|-----|-----|-----------|--------|------|------|-------|--------|------|------|------|--|
|                  |                  | n         | nmiss  | Mean                               | SD   | Q1   | Median | Q3   | Min | Max | n         | nmiss  | Mean | SD   | Q1    | Median | Q3   | Min  | Max  |  |
| Total (n=36)     | Visit day 1      | 36 (100%) | 0 (0%) | 3.7                                | 1.26 | 3.05 | 3.45   | 4.35 | 0.7 | 7   |           |        |      |      |       |        |      |      |      |  |
|                  | Follow-up day 15 | 36 (100%) | 0 (0%) | 3.6                                | 1.45 | 3.05 | 3.85   | 4.4  | 0.7 | 6.8 | 36 (100%) | 0 (0%) | -0.1 | 1.76 | -0.9  | 0.3    | 0.95 | -5.5 | 3.2  |  |
|                  | Follow-up day 45 | 36 (100%) | 0 (0%) | 4.9                                | 5.49 | 3.25 | 4.3    | 4.95 | 0.5 | 36  | 36 (100%) | 0 (0%) | 1.2  | 5.32 | -0.15 | 0.3    | 0.95 | -2.4 | 31.6 |  |
| NBMI100mg (n=13) | Visit day 1      | 13 (100%) | 0 (0%) | 3.8                                | 1.15 | 3    | 3.5    | 4.2  | 2.6 | 6.7 |           |        |      |      |       |        |      |      |      |  |
|                  | Follow-up day 15 | 13 (100%) | 0 (0%) | 3.4                                | 1.4  | 2.8  | 3.8    | 4.1  | 0.7 | 5.9 | 13 (100%) | 0 (0%) | -0.3 | 1.83 | -0.9  | 0.4    | 0.6  | -5.5 | 1.4  |  |
|                  | Follow-up day 45 | 13 (100%) | 0 (0%) | 3.9                                | 1.54 | 3.2  | 3.6    | 5.1  | 0.5 | 6.3 | 13 (100%) | 0 (0%) | 0.1  | 1.16 | -0.4  | 0      | 0.3  | -2.1 | 2.5  |  |
| NBMI300mg (n=11) | Visit day 1      | 11 (100%) | 0 (0%) | 3.8                                | 1.29 | 3.3  | 4.2    | 4.6  | 0.7 | 5.6 |           |        |      |      |       |        |      |      |      |  |
|                  | Follow-up day 15 | 11 (100%) | 0 (0%) | 4                                  | 1.68 | 3.1  | 3.9    | 4.6  | 1.1 | 6.8 | 11 (100%) | 0 (0%) | 0.2  | 1.81 | -0.9  | 0.1    | 2.2  | -3.2 | 2.6  |  |
|                  | Follow-up day 45 | 11 (100%) | 0 (0%) | 4.3                                | 1.31 | 3.3  | 4.2    | 5    | 2.7 | 7.3 | 11 (100%) | 0 (0%) | 0.5  | 1.1  | -0.1  | 0.2    | 0.8  | -0.9 | 2.8  |  |
| Placebo (n=12)   | Visit day 1      | 12 (100%) | 0 (0%) | 3.5                                | 1.44 | 2.9  | 3.35   | 3.85 | 0.7 | 7   |           |        |      |      |       |        |      |      |      |  |
|                  | Follow-up day 15 | 12 (100%) | 0 (0%) | 3.5                                | 1.35 | 3.3  | 3.8    | 4.35 | 0.7 | 5.2 | 12 (100%) | 0 (0%) | 0    | 1.76 | -1.25 | 0.45   | 1.05 | -2.7 | 3.2  |  |
|                  | Follow-up day 45 | 12 (100%) | 0 (0%) | 6.7                                | 9.31 | 3.8  | 4.55   | 4.75 | 1.1 | 36  | 12 (100%) | 0 (0%) | 3.2  | 9.02 | 0.55  | 0.85   | 1.3  | -2.4 | 31.6 |  |

Executed script: \\SDS-SERVER2\SAS\$\SDS3\Projects\STATISTICS DRUG DEV\NBMI4011 - CTI002\Analyser\Script\SAS\T\_cat001.sas, on: 23MAY2016:14:00, by: maria.lidsell  
Version of source data: nbmi\_neu.sas7bdat, last modified: 24FEB16:23:13, status: Final

Table DE5.20.1 Change from baseline of NMB, Rhythmic test slow P/S, Right hand, Average Time (Full analysis set)

| Treatment        | Visit            | Result    |        |      |      |         |         |         |        |       | Change from baseline (Visit day 1) |        |      |      |         |        |        |        |       |
|------------------|------------------|-----------|--------|------|------|---------|---------|---------|--------|-------|------------------------------------|--------|------|------|---------|--------|--------|--------|-------|
|                  |                  | n         | nmiss  | Mean | SD   | Q1      | Median  | Q3      | Min    | Max   | n                                  | nmiss  | Mean | SD   | Q1      | Median | Q3     | Min    | Max   |
| Total (n=36)     | Visit day 1      | 36 (100%) | 0 (0%) | -0.1 | 0.11 | -0.224  | -0.0885 | -0.005  | -0.25  | 0.034 |                                    |        |      |      |         |        |        |        |       |
|                  | Follow-up day 15 | 36 (100%) | 0 (0%) | 0    | 0.08 | -0.063  | -0.025  | 0.01    | -0.244 | 0.109 | 36 (100%)                          | 0 (0%) | 0.1  | 0.14 | -0.032  | 0.0635 | 0.2135 | -0.258 | 0.328 |
|                  | Follow-up day 45 | 36 (100%) | 0 (0%) | 0    | 0.11 | -0.113  | -0.037  | 0.0445  | -0.25  | 0.155 | 36 (100%)                          | 0 (0%) | 0.1  | 0.14 | -0.019  | 0.053  | 0.154  | -0.26  | 0.291 |
| NBMI100mg (n=13) | Visit day 1      | 13 (100%) | 0 (0%) | -0.1 | 0.1  | -0.179  | -0.05   | -0.008  | -0.25  | 0.026 |                                    |        |      |      |         |        |        |        |       |
|                  | Follow-up day 15 | 13 (100%) | 0 (0%) | -0.1 | 0.07 | -0.087  | -0.043  | -0.032  | -0.212 | 0.076 | 13 (100%)                          | 0 (0%) | 0    | 0.13 | -0.056  | -0.031 | 0.133  | -0.13  | 0.269 |
|                  | Follow-up day 45 | 13 (100%) | 0 (0%) | 0    | 0.12 | -0.049  | -0.002  | 0.083   | -0.231 | 0.155 | 13 (100%)                          | 0 (0%) | 0.1  | 0.15 | -0.014  | 0.09   | 0.168  | -0.223 | 0.291 |
| NBMI300mg (n=11) | Visit day 1      | 11 (100%) | 0 (0%) | -0.1 | 0.12 | -0.236  | -0.142  | 0.003   | -0.25  | 0.022 |                                    |        |      |      |         |        |        |        |       |
|                  | Follow-up day 15 | 11 (100%) | 0 (0%) | 0    | 0.07 | -0.024  | -0.009  | 0.028   | -0.135 | 0.109 | 11 (100%)                          | 0 (0%) | 0.1  | 0.13 | -0.017  | 0.059  | 0.251  | -0.044 | 0.3   |
|                  | Follow-up day 45 | 11 (100%) | 0 (0%) | -0.1 | 0.1  | -0.145  | -0.089  | 0.042   | -0.25  | 0.047 | 11 (100%)                          | 0 (0%) | 0    | 0.13 | -0.108  | 0.034  | 0.117  | -0.114 | 0.27  |
| Placebo (n=12)   | Visit day 1      | 12 (100%) | 0 (0%) | -0.1 | 0.11 | -0.2335 | -0.129  | -0.05   | -0.25  | 0.034 |                                    |        |      |      |         |        |        |        |       |
|                  | Follow-up day 15 | 12 (100%) | 0 (0%) | 0    | 0.08 | -0.0415 | -0.0225 | -0.0095 | -0.244 | 0.078 | 12 (100%)                          | 0 (0%) | 0.1  | 0.17 | 0.036   | 0.112  | 0.2135 | -0.258 | 0.328 |
|                  | Follow-up day 45 | 12 (100%) | 0 (0%) | -0.1 | 0.11 | -0.1075 | -0.035  | 0.0245  | -0.247 | 0.074 | 12 (100%)                          | 0 (0%) | 0.1  | 0.15 | -0.0055 | 0.0845 | 0.1665 | -0.26  | 0.278 |

Executed script: \\SDS-SERVER2\SAS\$\SDS3\Projects\STATISTICS DRUG DEV\NBMI4011 - CTI002\Analyser\Script\SAS\T\_cat001.sas, on: 23MAY2016:14:00, by: maria.lidsell  
Version of source data: nbmi\_neu.sas7bdat, last modified: 24FEB16:23:13, status: Final

Table DE5.21.1 Change from baseline of NMB, Rhythmic test slow P/S, Right hand, Standard Deviation (Full analysis set)

| Treatment        | Visit            | Result    |        | Change from baseline (Visit day 1) |      |        |        |        |       |       |           |        |      |      |        |        |        |        |       |  |
|------------------|------------------|-----------|--------|------------------------------------|------|--------|--------|--------|-------|-------|-----------|--------|------|------|--------|--------|--------|--------|-------|--|
|                  |                  | n         | nmiss  | Mean                               | SD   | Q1     | Median | Q3     | Min   | Max   | n         | nmiss  | Mean | SD   | Q1     | Median | Q3     | Min    | Max   |  |
| Total (n=36)     | Visit day 1      | 36 (100%) | 0 (0%) | 0.1                                | 0.04 | 0.033  | 0.0425 | 0.076  | 0     | 0.185 |           |        |      |      |        |        |        |        |       |  |
|                  | Follow-up day 15 | 36 (100%) | 0 (0%) | 0.1                                | 0.04 | 0.039  | 0.0525 | 0.084  | 0.008 | 0.166 | 36 (100%) | 0 (0%) | 0    | 0.06 | -0.031 | 0.0075 | 0.033  | -0.165 | 0.143 |  |
|                  | Follow-up day 45 | 36 (100%) | 0 (0%) | 0.1                                | 0.05 | 0.039  | 0.059  | 0.0875 | 0     | 0.185 | 36 (100%) | 0 (0%) | 0    | 0.06 | -0.008 | 0.0135 | 0.0555 | -0.151 | 0.137 |  |
| NBMI100mg (n=13) | Visit day 1      | 13 (100%) | 0 (0%) | 0.1                                | 0.05 | 0.04   | 0.05   | 0.086  | 0     | 0.185 |           |        |      |      |        |        |        |        |       |  |
|                  | Follow-up day 15 | 13 (100%) | 0 (0%) | 0.1                                | 0.05 | 0.038  | 0.042  | 0.099  | 0.02  | 0.166 | 13 (100%) | 0 (0%) | 0    | 0.07 | -0.033 | -0.001 | 0.037  | -0.165 | 0.116 |  |
|                  | Follow-up day 45 | 13 (100%) | 0 (0%) | 0.1                                | 0.05 | 0.039  | 0.066  | 0.101  | 0.028 | 0.185 | 13 (100%) | 0 (0%) | 0    | 0.07 | -0.025 | 0.024  | 0.061  | -0.151 | 0.099 |  |
| NBMI300mg (n=11) | Visit day 1      | 11 (100%) | 0 (0%) | 0.1                                | 0.04 | 0.027  | 0.05   | 0.087  | 0     | 0.12  |           |        |      |      |        |        |        |        |       |  |
|                  | Follow-up day 15 | 11 (100%) | 0 (0%) | 0.1                                | 0.04 | 0.042  | 0.063  | 0.078  | 0.027 | 0.162 | 11 (100%) | 0 (0%) | 0    | 0.06 | -0.03  | 0.007  | 0.02   | -0.076 | 0.143 |  |
|                  | Follow-up day 45 | 11 (100%) | 0 (0%) | 0.1                                | 0.03 | 0.039  | 0.055  | 0.088  | 0     | 0.123 | 11 (100%) | 0 (0%) | 0    | 0.04 | -0.004 | 0.008  | 0.037  | -0.071 | 0.07  |  |
| Placebo (n=12)   | Visit day 1      | 12 (100%) | 0 (0%) | 0                                  | 0.03 | 0.0195 | 0.0355 | 0.0535 | 0     | 0.105 |           |        |      |      |        |        |        |        |       |  |
|                  | Follow-up day 15 | 12 (100%) | 0 (0%) | 0.1                                | 0.03 | 0.0335 | 0.0525 | 0.0775 | 0.008 | 0.103 | 12 (100%) | 0 (0%) | 0    | 0.04 | -0.021 | 0.0225 | 0.037  | -0.051 | 0.098 |  |
|                  | Follow-up day 45 | 12 (100%) | 0 (0%) | 0.1                                | 0.05 | 0.0375 | 0.054  | 0.0695 | 0.004 | 0.18  | 12 (100%) | 0 (0%) | 0    | 0.06 | -0.003 | 0.0105 | 0.0565 | -0.084 | 0.137 |  |

Executed script: \\SDS-SERVER2\SAS\$\SDS3\Projects\STATISTICS DRUG DEV\NBMI4011 - CTI002\Analyser\Script\SAS\T\_cat001.sas, on: 23MAY2016:14:00, by: maria.lidsell  
Version of source data: nbmi\_neu.sas7bdat, last modified: 24FEB16:23:13, status: Final

Table DE5.22.1 Change from baseline of NMB, Rhythmic test slow P/S, Right hand, P Index (Full analysis set)

| Treatment        | Visit            | Result    |        | Change from baseline (Visit day 1) |       |      |        |       |     |     |           |        |       |       |       |        |      |      |     |  |
|------------------|------------------|-----------|--------|------------------------------------|-------|------|--------|-------|-----|-----|-----------|--------|-------|-------|-------|--------|------|------|-----|--|
|                  |                  | n         | nmiss  | Mean                               | SD    | Q1   | Median | Q3    | Min | Max | n         | nmiss  | Mean  | SD    | Q1    | Median | Q3   | Min  | Max |  |
| Total (n=36)     | Visit day 1      | 36 (100%) | 0 (0%) | 118.3                              | 56.18 | 69   | 144.5  | 157   | 3   | 183 |           |        |       |       |       |        |      |      |     |  |
|                  | Follow-up day 15 | 36 (100%) | 0 (0%) | 107.4                              | 54.52 | 56   | 126    | 149.5 | 5   | 179 | 36 (100%) | 0 (0%) | -10.9 | 82.5  | -53.5 | -16    | 38   | -166 | 168 |  |
|                  | Follow-up day 45 | 36 (100%) | 0 (0%) | 106.4                              | 53.1  | 62   | 118.5  | 151.5 | 4   | 183 | 36 (100%) | 0 (0%) | -11.9 | 71.65 | -64.5 | -15    | 20   | -137 | 153 |  |
| NBMI100mg (n=13) | Visit day 1      | 13 (100%) | 0 (0%) | 102.2                              | 60.19 | 52   | 131    | 149   | 3   | 183 |           |        |       |       |       |        |      |      |     |  |
|                  | Follow-up day 15 | 13 (100%) | 0 (0%) | 106.1                              | 61.79 | 36   | 145    | 151   | 5   | 171 | 13 (100%) | 0 (0%) | 3.9   | 92.13 | -31   | 1      | 74   | -137 | 168 |  |
|                  | Follow-up day 45 | 13 (100%) | 0 (0%) | 94.6                               | 53.58 | 53   | 91     | 150   | 13  | 164 | 13 (100%) | 0 (0%) | -7.5  | 79.41 | -58   | -27    | 44   | -115 | 153 |  |
| NBMI300mg (n=11) | Visit day 1      | 11 (100%) | 0 (0%) | 116.2                              | 58.29 | 50   | 132    | 164   | 20  | 183 |           |        |       |       |       |        |      |      |     |  |
|                  | Follow-up day 15 | 11 (100%) | 0 (0%) | 100.4                              | 52.91 | 66   | 99     | 145   | 6   | 164 | 11 (100%) | 0 (0%) | -15.8 | 85.11 | -50   | -13    | 40   | -166 | 122 |  |
|                  | Follow-up day 45 | 11 (100%) | 0 (0%) | 101.9                              | 55.74 | 50   | 120    | 150   | 18  | 183 | 11 (100%) | 0 (0%) | -14.3 | 68.11 | -63   | -13    | 6    | -125 | 124 |  |
| Placebo (n=12)   | Visit day 1      | 12 (100%) | 0 (0%) | 137.8                              | 47.7  | 121  | 154.5  | 170   | 30  | 183 |           |        |       |       |       |        |      |      |     |  |
|                  | Follow-up day 15 | 12 (100%) | 0 (0%) | 115.3                              | 51.27 | 69.5 | 126    | 156.5 | 32  | 179 | 12 (100%) | 0 (0%) | -22.5 | 73.34 | -58   | -28.5  | 21   | -149 | 99  |  |
|                  | Follow-up day 45 | 12 (100%) | 0 (0%) | 123.3                              | 50.18 | 93   | 132.5  | 162.5 | 4   | 181 | 12 (100%) | 0 (0%) | -14.4 | 72.14 | -70.5 | -13    | 16.5 | -137 | 140 |  |

Executed script: \\SDS-SERVER2\SAS\$\SDS3\Projects\STATISTICS DRUG DEV\NBMI4011 - CTI002\Analyser\Script\SAS\T\_cat001.sas, on: 23MAY2016:14:00, by: maria.lidsell  
Version of source data: nbmi\_neu.sas7bdat, last modified: 24FEB16:23:13, status: Final

Table DE5.23.1 Change from baseline of NMB, Rhythmic test slow P/S, Left hand, Average Time (Full analysis set)

| Treatment        | Visit            | Result    |        | Change from baseline (Visit day 1) |      |         |         |         |        |        |           |        |      |      |         |        |        |        |       |  |
|------------------|------------------|-----------|--------|------------------------------------|------|---------|---------|---------|--------|--------|-----------|--------|------|------|---------|--------|--------|--------|-------|--|
|                  |                  | n         | nmiss  | Mean                               | SD   | Q1      | Median  | Q3      | Min    | Max    | n         | nmiss  | Mean | SD   | Q1      | Median | Q3     | Min    | Max   |  |
| Total (n=36)     | Visit day 1      | 36 (100%) | 0 (0%) | -0.1                               | 0.09 | -0.2055 | -0.1275 | -0.031  | -0.25  | 0.019  |           |        |      |      |         |        |        |        |       |  |
|                  | Follow-up day 15 | 36 (100%) | 0 (0%) | -0.1                               | 0.08 | -0.106  | -0.0355 | -0.003  | -0.232 | 0.108  | 36 (100%) | 0 (0%) | 0.1  | 0.12 | -0.0255 | 0.0415 | 0.1725 | -0.227 | 0.358 |  |
|                  | Follow-up day 45 | 36 (100%) | 0 (0%) | -0.1                               | 0.1  | -0.092  | -0.045  | -0.005  | -0.25  | 0.186  | 36 (100%) | 0 (0%) | 0.1  | 0.14 | -0.0385 | 0.0555 | 0.174  | -0.226 | 0.338 |  |
| NBMI100mg (n=13) | Visit day 1      | 13 (100%) | 0 (0%) | -0.1                               | 0.07 | -0.141  | -0.071  | -0.054  | -0.236 | -0.006 |           |        |      |      |         |        |        |        |       |  |
|                  | Follow-up day 15 | 13 (100%) | 0 (0%) | 0                                  | 0.09 | -0.117  | -0.02   | 0.018   | -0.221 | 0.087  | 13 (100%) | 0 (0%) | 0.1  | 0.08 | 0.017   | 0.042  | 0.076  | -0.064 | 0.228 |  |
|                  | Follow-up day 45 | 13 (100%) | 0 (0%) | 0                                  | 0.1  | -0.055  | 0.007   | 0.027   | -0.25  | 0.186  | 13 (100%) | 0 (0%) | 0.1  | 0.12 | 0.036   | 0.078  | 0.203  | -0.124 | 0.256 |  |
| NBMI300mg (n=11) | Visit day 1      | 11 (100%) | 0 (0%) | -0.1                               | 0.12 | -0.25   | -0.037  | -0.014  | -0.25  | 0.019  |           |        |      |      |         |        |        |        |       |  |
|                  | Follow-up day 15 | 11 (100%) | 0 (0%) | 0                                  | 0.07 | -0.075  | -0.039  | -0.013  | -0.174 | 0.108  | 11 (100%) | 0 (0%) | 0.1  | 0.15 | -0.038  | -0.011 | 0.237  | -0.056 | 0.358 |  |
|                  | Follow-up day 45 | 11 (100%) | 0 (0%) | -0.1                               | 0.09 | -0.146  | -0.071  | -0.031  | -0.25  | 0.088  | 11 (100%) | 0 (0%) | 0    | 0.17 | -0.102  | -0.036 | 0.198  | -0.226 | 0.338 |  |
| Placebo (n=12)   | Visit day 1      | 12 (100%) | 0 (0%) | -0.1                               | 0.08 | -0.2055 | -0.1375 | -0.055  | -0.228 | -0.005 |           |        |      |      |         |        |        |        |       |  |
|                  | Follow-up day 15 | 12 (100%) | 0 (0%) | -0.1                               | 0.08 | -0.139  | -0.0365 | -0.003  | -0.232 | 0.006  | 12 (100%) | 0 (0%) | 0.1  | 0.14 | -0.029  | 0.0915 | 0.1835 | -0.227 | 0.211 |  |
|                  | Follow-up day 45 | 12 (100%) | 0 (0%) | -0.1                               | 0.08 | -0.111  | -0.056  | -0.0305 | -0.247 | 0.019  | 12 (100%) | 0 (0%) | 0    | 0.12 | -0.032  | 0.0305 | 0.1485 | -0.219 | 0.231 |  |

Executed script: \\SDS-SERVER2\SAS\$\SDS3\Projects\STATISTICS DRUG DEV\NBMI4011 - CTI002\Analyser\Script\SAS\T\_cat001.sas, on: 23MAY2016:14:00, by: maria.lidsell  
Version of source data: nbmi\_neu.sas7bdat, last modified: 24FEB16:23:13, status: Final

Table DE5.24.1 Change from baseline of NMB, Rhythmic test slow P/S, Left hand, Standard Deviation (Full analysis set)

| Treatment        | Visit            | Result    |        | Change from baseline (Visit day 1) |      |        |        |        |       |       |           |        |      |      |         |        |        |        |       |  |
|------------------|------------------|-----------|--------|------------------------------------|------|--------|--------|--------|-------|-------|-----------|--------|------|------|---------|--------|--------|--------|-------|--|
|                  |                  | n         | nmiss  | Mean                               | SD   | Q1     | Median | Q3     | Min   | Max   | n         | nmiss  | Mean | SD   | Q1      | Median | Q3     | Min    | Max   |  |
| Total (n=36)     | Visit day 1      | 36 (100%) | 0 (0%) | 0.1                                | 0.04 | 0.032  | 0.0545 | 0.0815 | 0     | 0.175 |           |        |      |      |         |        |        |        |       |  |
|                  | Follow-up day 15 | 36 (100%) | 0 (0%) | 0.1                                | 0.04 | 0.033  | 0.0485 | 0.078  | 0.021 | 0.194 | 36 (100%) | 0 (0%) | 0    | 0.05 | -0.0175 | 0      | 0.022  | -0.134 | 0.099 |  |
|                  | Follow-up day 45 | 36 (100%) | 0 (0%) | 0.1                                | 0.04 | 0.0375 | 0.05   | 0.077  | 0     | 0.214 | 36 (100%) | 0 (0%) | 0    | 0.05 | -0.0305 | 0.001  | 0.027  | -0.124 | 0.17  |  |
| NBMI100mg (n=13) | Visit day 1      | 13 (100%) | 0 (0%) | 0.1                                | 0.05 | 0.054  | 0.069  | 0.124  | 0.029 | 0.175 |           |        |      |      |         |        |        |        |       |  |
|                  | Follow-up day 15 | 13 (100%) | 0 (0%) | 0.1                                | 0.05 | 0.046  | 0.056  | 0.083  | 0.028 | 0.194 | 13 (100%) | 0 (0%) | 0    | 0.06 | -0.026  | 0.001  | 0.02   | -0.134 | 0.087 |  |
|                  | Follow-up day 45 | 13 (100%) | 0 (0%) | 0.1                                | 0.04 | 0.047  | 0.051  | 0.087  | 0     | 0.146 | 13 (100%) | 0 (0%) | 0    | 0.05 | -0.049  | -0.006 | 0.014  | -0.124 | 0.055 |  |
| NBMI300mg (n=11) | Visit day 1      | 11 (100%) | 0 (0%) | 0                                  | 0.02 | 0      | 0.032  | 0.052  | 0     | 0.07  |           |        |      |      |         |        |        |        |       |  |
|                  | Follow-up day 15 | 11 (100%) | 0 (0%) | 0.1                                | 0.04 | 0.029  | 0.043  | 0.079  | 0.021 | 0.143 | 11 (100%) | 0 (0%) | 0    | 0.04 | -0.021  | 0.009  | 0.06   | -0.026 | 0.099 |  |
|                  | Follow-up day 45 | 11 (100%) | 0 (0%) | 0.1                                | 0.06 | 0.03   | 0.045  | 0.107  | 0     | 0.214 | 11 (100%) | 0 (0%) | 0    | 0.06 | 0.001   | 0.04   | 0.051  | -0.052 | 0.17  |  |
| Placebo (n=12)   | Visit day 1      | 12 (100%) | 0 (0%) | 0.1                                | 0.03 | 0.0365 | 0.0675 | 0.085  | 0.024 | 0.121 |           |        |      |      |         |        |        |        |       |  |
|                  | Follow-up day 15 | 12 (100%) | 0 (0%) | 0.1                                | 0.03 | 0.033  | 0.05   | 0.0755 | 0.027 | 0.107 | 12 (100%) | 0 (0%) | 0    | 0.02 | -0.0135 | -0.003 | 0.0055 | -0.053 | 0.024 |  |
|                  | Follow-up day 45 | 12 (100%) | 0 (0%) | 0                                  | 0.02 | 0.0365 | 0.0465 | 0.066  | 0.006 | 0.091 | 12 (100%) | 0 (0%) | 0    | 0.03 | -0.034  | -0.012 | 0.0045 | -0.079 | 0.045 |  |

Executed script: \\SDS-SERVER2\SAS\$\SDS3\Projects\STATISTICS DRUG DEV\NBMI4011 - CTI002\Analyser\Script\SAS\T\_cat001.sas, on: 23MAY2016:14:00, by: maria.lidsell  
Version of source data: nbmi\_neu.sas7bdat, last modified: 24FEB16:23:13, status: Final

Table DE5.25.1 Change from baseline of NMB, Rhythmic test slow P/S, Left hand, P Index (Full analysis set)

| Treatment        | Visit            | Result    |        | Change from baseline (Visit day 1) |       |      |        |       |     |     |           |        |       |       |       |        |      |      |     |  |
|------------------|------------------|-----------|--------|------------------------------------|-------|------|--------|-------|-----|-----|-----------|--------|-------|-------|-------|--------|------|------|-----|--|
|                  |                  | n         | nmiss  | Mean                               | SD    | Q1   | Median | Q3    | Min | Max | n         | nmiss  | Mean  | SD    | Q1    | Median | Q3   | Min  | Max |  |
| Total (n=36)     | Visit day 1      | 36 (100%) | 0 (0%) | 99.4                               | 50.23 | 58.5 | 105.5  | 142   | 8   | 171 |           |        |       |       |       |        |      |      |     |  |
|                  | Follow-up day 15 | 36 (100%) | 0 (0%) | 100.5                              | 44.82 | 62.5 | 116.5  | 140.5 | 5   | 154 | 36 (100%) | 0 (0%) | 1.2   | 51.75 | -29.5 | 1.5    | 28   | -113 | 121 |  |
|                  | Follow-up day 45 | 36 (100%) | 0 (0%) | 101.8                              | 46.4  | 65   | 113.5  | 134.5 | 3   | 171 | 36 (100%) | 0 (0%) | 2.5   | 58.07 | -32   | -2.5   | 41   | -122 | 115 |  |
| NBMI100mg (n=13) | Visit day 1      | 13 (100%) | 0 (0%) | 74.5                               | 51.11 | 23   | 77     | 107   | 8   | 145 |           |        |       |       |       |        |      |      |     |  |
|                  | Follow-up day 15 | 13 (100%) | 0 (0%) | 89.5                               | 47.75 | 56   | 102    | 122   | 5   | 147 | 13 (100%) | 0 (0%) | 15    | 54.9  | -29   | 0      | 40   | -40  | 121 |  |
|                  | Follow-up day 45 | 13 (100%) | 0 (0%) | 95.8                               | 45.66 | 53   | 111    | 120   | 14  | 171 | 13 (100%) | 0 (0%) | 21.3  | 59.87 | -14   | 5      | 55   | -89  | 115 |  |
| NBMI300mg (n=11) | Visit day 1      | 11 (100%) | 0 (0%) | 136.1                              | 31.79 | 111  | 142    | 171   | 76  | 171 |           |        |       |       |       |        |      |      |     |  |
|                  | Follow-up day 15 | 11 (100%) | 0 (0%) | 109.5                              | 46.23 | 61   | 126    | 145   | 16  | 154 | 11 (100%) | 0 (0%) | -26.6 | 56.39 | -77   | -11    | 30   | -113 | 43  |  |
|                  | Follow-up day 45 | 11 (100%) | 0 (0%) | 98.5                               | 59.39 | 33   | 122    | 145   | 3   | 171 | 11 (100%) | 0 (0%) | -37.6 | 49.16 | -67   | -40    | -2   | -122 | 60  |  |
| Placebo (n=12)   | Visit day 1      | 12 (100%) | 0 (0%) | 92.7                               | 46.14 | 54   | 80.5   | 136   | 25  | 152 |           |        |       |       |       |        |      |      |     |  |
|                  | Follow-up day 15 | 12 (100%) | 0 (0%) | 104.3                              | 41.5  | 67   | 113.5  | 140.5 | 34  | 148 | 12 (100%) | 0 (0%) | 11.7  | 34.96 | -6.5  | 5.5    | 14.5 | -44  | 87  |  |
|                  | Follow-up day 45 | 12 (100%) | 0 (0%) | 111.5                              | 34.82 | 83   | 119.5  | 136   | 48  | 167 | 12 (100%) | 0 (0%) | 18.8  | 47.97 | -6.5  | 18     | 53.5 | -76  | 102 |  |

Executed script: \\SDS-SERVER2\SAS\$\SDS3\Projects\STATISTICS DRUG DEV\NBMI4011 - CTI002\Analyser\Script\SAS\T\_cat001.sas, on: 23MAY2016:14:00, by: maria.lidsell  
Version of source data: nbmi\_neu.sas7bdat, last modified: 24FEB16:23:13, status: Final

Table DE5.26.1 Change from baseline of NMB, Rhythmic test fast P/S, Right hand, Average Time (Full analysis set)

| Treatment        | Visit            | Result    |        |      |      |         |         |         |        |        | Change from baseline (Visit day 1) |        |      |      |         |        |        |        |       |
|------------------|------------------|-----------|--------|------|------|---------|---------|---------|--------|--------|------------------------------------|--------|------|------|---------|--------|--------|--------|-------|
|                  |                  | n         | nmiss  | Mean | SD   | Q1      | Median  | Q3      | Min    | Max    | n                                  | nmiss  | Mean | SD   | Q1      | Median | Q3     | Min    | Max   |
| Total (n=36)     | Visit day 1      | 36 (100%) | 0 (0%) | -0.1 | 0.07 | -0.1645 | -0.094  | -0.069  | -0.245 | 0.033  |                                    |        |      |      |         |        |        |        |       |
|                  | Follow-up day 15 | 36 (100%) | 0 (0%) | -0.1 | 0.06 | -0.101  | -0.029  | -0.007  | -0.192 | 0.037  | 36 (100%)                          | 0 (0%) | 0.1  | 0.08 | 0.001   | 0.0545 | 0.114  | -0.133 | 0.206 |
|                  | Follow-up day 45 | 36 (100%) | 0 (0%) | -0.1 | 0.08 | -0.168  | -0.0725 | -0.022  | -0.25  | 0.011  | 36 (100%)                          | 0 (0%) | 0    | 0.1  | -0.0385 | 0.0015 | 0.0985 | -0.203 | 0.189 |
| NBMI100mg (n=13) | Visit day 1      | 13 (100%) | 0 (0%) | -0.1 | 0.06 | -0.151  | -0.097  | -0.073  | -0.207 | 0.012  |                                    |        |      |      |         |        |        |        |       |
|                  | Follow-up day 15 | 13 (100%) | 0 (0%) | -0.1 | 0.08 | -0.132  | -0.023  | -0.002  | -0.189 | 0.037  | 13 (100%)                          | 0 (0%) | 0    | 0.08 | 0.006   | 0.033  | 0.098  | -0.133 | 0.172 |
|                  | Follow-up day 45 | 13 (100%) | 0 (0%) | -0.1 | 0.09 | -0.189  | -0.051  | -0.011  | -0.25  | 0.011  | 13 (100%)                          | 0 (0%) | 0    | 0.11 | -0.034  | 0.033  | 0.108  | -0.171 | 0.156 |
| NBMI300mg (n=11) | Visit day 1      | 11 (100%) | 0 (0%) | -0.1 | 0.09 | -0.19   | -0.095  | -0.045  | -0.245 | 0.033  |                                    |        |      |      |         |        |        |        |       |
|                  | Follow-up day 15 | 11 (100%) | 0 (0%) | 0    | 0.05 | -0.08   | -0.031  | -0.003  | -0.157 | 0.021  | 11 (100%)                          | 0 (0%) | 0.1  | 0.08 | -0.012  | 0.083  | 0.152  | -0.042 | 0.191 |
|                  | Follow-up day 45 | 11 (100%) | 0 (0%) | -0.1 | 0.09 | -0.183  | -0.119  | -0.027  | -0.25  | -0.004 | 11 (100%)                          | 0 (0%) | 0    | 0.1  | -0.065  | -0.019 | 0.089  | -0.188 | 0.163 |
| Placebo (n=12)   | Visit day 1      | 12 (100%) | 0 (0%) | -0.1 | 0.07 | -0.161  | -0.0915 | -0.069  | -0.228 | -0.006 |                                    |        |      |      |         |        |        |        |       |
|                  | Follow-up day 15 | 12 (100%) | 0 (0%) | -0.1 | 0.06 | -0.1015 | -0.029  | -0.0115 | -0.192 | 0.017  | 12 (100%)                          | 0 (0%) | 0.1  | 0.09 | 0.0025  | 0.049  | 0.1125 | -0.102 | 0.206 |
|                  | Follow-up day 45 | 12 (100%) | 0 (0%) | -0.1 | 0.07 | -0.1215 | -0.0665 | -0.0285 | -0.222 | -0.009 | 12 (100%)                          | 0 (0%) | 0    | 0.1  | -0.024  | 0.032  | 0.0945 | -0.203 | 0.189 |

Executed script: \\SDS-SERVER2\SAS\$\SDS3\Projects\STATISTICS DRUG DEV\NBMI4011 - CTI002\Analyser\Script\SAS\T\_cat001.sas, on: 23MAY2016:14:00, by: maria.lidsell  
Version of source data: nbmi\_neu.sas7bdat, last modified: 24FEB16:23:13, status: Final



Table DE5.27.1 Change from baseline of NMB, Rhythmic test fast P/S, Right hand, Standard Deviation (Full analysis set)

| Treatment        | Visit            | Result    |        |      |      |        |        |        |       |       | Change from baseline (Visit day 1) |        |      |      |         |         |        |        |       |
|------------------|------------------|-----------|--------|------|------|--------|--------|--------|-------|-------|------------------------------------|--------|------|------|---------|---------|--------|--------|-------|
|                  |                  | n         | nmiss  | Mean | SD   | Q1     | Median | Q3     | Min   | Max   | n                                  | nmiss  | Mean | SD   | Q1      | Median  | Q3     | Min    | Max   |
| Total (n=36)     | Visit day 1      | 36 (100%) | 0 (0%) | 0.1  | 0.04 | 0.0645 | 0.1095 | 0.13   | 0.014 | 0.144 |                                    |        |      |      |         |         |        |        |       |
|                  | Follow-up day 15 | 36 (100%) | 0 (0%) | 0.1  | 0.04 | 0.031  | 0.0725 | 0.1085 | 0.013 | 0.137 | 36 (100%)                          | 0 (0%) | 0    | 0.05 | -0.0575 | -0.0225 | 0.011  | -0.105 | 0.081 |
|                  | Follow-up day 45 | 36 (100%) | 0 (0%) | 0.1  | 0.04 | 0.0235 | 0.075  | 0.1085 | 0     | 0.142 | 36 (100%)                          | 0 (0%) | 0    | 0.05 | -0.0685 | -0.0225 | 0.0045 | -0.124 | 0.081 |
| NBMI100mg (n=13) | Visit day 1      | 13 (100%) | 0 (0%) | 0.1  | 0.04 | 0.05   | 0.11   | 0.131  | 0.026 | 0.144 |                                    |        |      |      |         |         |        |        |       |
|                  | Follow-up day 15 | 13 (100%) | 0 (0%) | 0.1  | 0.04 | 0.052  | 0.086  | 0.113  | 0.013 | 0.136 | 13 (100%)                          | 0 (0%) | 0    | 0.05 | -0.036  | -0.003  | 0.021  | -0.105 | 0.081 |
|                  | Follow-up day 45 | 13 (100%) | 0 (0%) | 0.1  | 0.04 | 0.025  | 0.08   | 0.096  | 0.002 | 0.121 | 13 (100%)                          | 0 (0%) | 0    | 0.06 | -0.065  | -0.024  | 0.013  | -0.12  | 0.081 |
| NBMI300mg (n=11) | Visit day 1      | 11 (100%) | 0 (0%) | 0.1  | 0.04 | 0.059  | 0.097  | 0.129  | 0.021 | 0.141 |                                    |        |      |      |         |         |        |        |       |
|                  | Follow-up day 15 | 11 (100%) | 0 (0%) | 0.1  | 0.04 | 0.024  | 0.068  | 0.106  | 0.015 | 0.137 | 11 (100%)                          | 0 (0%) | 0    | 0.05 | -0.061  | -0.023  | 0.032  | -0.094 | 0.064 |
|                  | Follow-up day 45 | 11 (100%) | 0 (0%) | 0.1  | 0.05 | 0.019  | 0.063  | 0.113  | 0     | 0.142 | 11 (100%)                          | 0 (0%) | 0    | 0.05 | -0.072  | -0.021  | 0.002  | -0.097 | 0.054 |
| Placebo (n=12)   | Visit day 1      | 12 (100%) | 0 (0%) | 0.1  | 0.04 | 0.0735 | 0.11   | 0.1245 | 0.014 | 0.139 |                                    |        |      |      |         |         |        |        |       |
|                  | Follow-up day 15 | 12 (100%) | 0 (0%) | 0.1  | 0.04 | 0.025  | 0.047  | 0.096  | 0.015 | 0.137 | 12 (100%)                          | 0 (0%) | 0    | 0.04 | -0.066  | -0.023  | 0.002  | -0.104 | 0.01  |
|                  | Follow-up day 45 | 12 (100%) | 0 (0%) | 0.1  | 0.04 | 0.028  | 0.076  | 0.1115 | 0.01  | 0.132 | 12 (100%)                          | 0 (0%) | 0    | 0.05 | -0.065  | -0.015  | 0.004  | -0.124 | 0.062 |

Executed script: \\SDS-SERVER2\SAS\$\SDS3\Projects\STATISTICS DRUG DEV\NBMI4011 - CTI002\Analyser\Script\SAS\T\_cat001.sas, on: 23MAY2016:14:00, by: maria.lidsell  
Version of source data: nbmi\_neu.sas7bdat, last modified: 24FEB16:23:13, status: Final

Table DE5.28.1 Change from baseline of NMB, Rhythmic test fast P/S, Right hand, P Index (Full analysis set)

| Treatment        | Visit            | Result    |        |      |       |     |        |       |     |     | Change from baseline (Visit day 1) |        |      |       |      |        |      |      |     |
|------------------|------------------|-----------|--------|------|-------|-----|--------|-------|-----|-----|------------------------------------|--------|------|-------|------|--------|------|------|-----|
|                  |                  | n         | nmiss  | Mean | SD    | Q1  | Median | Q3    | Min | Max | n                                  | nmiss  | Mean | SD    | Q1   | Median | Q3   | Min  | Max |
| Total (n=36)     | Visit day 1      | 36 (100%) | 0 (0%) | 30.2 | 50.91 | 1   | 3      | 25    | 1   | 158 |                                    |        |      |       |      |        |      |      |     |
|                  | Follow-up day 15 | 36 (100%) | 0 (0%) | 50.3 | 58.59 | 3   | 17     | 109   | 1   | 160 | 36 (100%)                          | 0 (0%) | 20.1 | 64.05 | -2.5 | 2      | 34   | -102 | 154 |
|                  | Follow-up day 45 | 36 (100%) | 0 (0%) | 55.2 | 67.13 | 3   | 15     | 135   | 1   | 178 | 36 (100%)                          | 0 (0%) | 25   | 75.93 | -0.5 | 7      | 58.5 | -124 | 173 |
| NBMI100mg (n=13) | Visit day 1      | 13 (100%) | 0 (0%) | 31.3 | 48.82 | 1   | 3      | 45    | 1   | 127 |                                    |        |      |       |      |        |      |      |     |
|                  | Follow-up day 15 | 13 (100%) | 0 (0%) | 33.7 | 50.83 | 3   | 9      | 42    | 1   | 160 | 13 (100%)                          | 0 (0%) | 2.4  | 67.1  | -36  | 0      | 7    | -102 | 154 |
|                  | Follow-up day 45 | 13 (100%) | 0 (0%) | 52.4 | 67.34 | 6   | 12     | 131   | 2   | 175 | 13 (100%)                          | 0 (0%) | 21.1 | 85.2  | -3   | 9      | 37   | -124 | 173 |
| NBMI300mg (n=11) | Visit day 1      | 11 (100%) | 0 (0%) | 31.8 | 55.18 | 1   | 5      | 31    | 1   | 143 |                                    |        |      |       |      |        |      |      |     |
|                  | Follow-up day 15 | 11 (100%) | 0 (0%) | 50.6 | 62.32 | 4   | 21     | 133   | 1   | 156 | 11 (100%)                          | 0 (0%) | 18.8 | 70.33 | -10  | 3      | 41   | -100 | 142 |
|                  | Follow-up day 45 | 11 (100%) | 0 (0%) | 61.6 | 73.32 | 3   | 25     | 146   | 1   | 178 | 11 (100%)                          | 0 (0%) | 29.8 | 77.71 | 0    | 11     | 80   | -108 | 173 |
| Placebo (n=12)   | Visit day 1      | 12 (100%) | 0 (0%) | 27.6 | 53.55 | 1.5 | 3.5    | 16    | 1   | 158 |                                    |        |      |       |      |        |      |      |     |
|                  | Follow-up day 15 | 12 (100%) | 0 (0%) | 68.1 | 62.48 | 6.5 | 60.5   | 129.5 | 1   | 156 | 12 (100%)                          | 0 (0%) | 40.5 | 53.09 | 0    | 10.5   | 93   | -2   | 134 |
|                  | Follow-up day 45 | 12 (100%) | 0 (0%) | 52.3 | 66.69 | 3   | 14.5   | 116.5 | 1   | 165 | 12 (100%)                          | 0 (0%) | 24.8 | 69.97 | -0.5 | 5.5    | 58   | -105 | 155 |

Executed script: \\SDS-SERVER2\SAS\$\SDS3\Projects\STATISTICS DRUG DEV\NBMI4011 - CTI002\Analyser\Script\SAS\T\_cat001.sas, on: 23MAY2016:14:00, by: maria.lidsell  
Version of source data: nbmi\_neu.sas7bdat, last modified: 24FEB16:23:13, status: Final

Table DE5.29.1 Change from baseline of NMB, Rhythmic test fast P/S, Left hand, Average Time (Full analysis set)

| Treatment        | Visit            | Result    |        | Change from baseline (Visit day 1) |      |         |         |         |        |        |           |        |      |      |         |         |        |        |       |
|------------------|------------------|-----------|--------|------------------------------------|------|---------|---------|---------|--------|--------|-----------|--------|------|------|---------|---------|--------|--------|-------|
|                  |                  | n         | nmiss  | Mean                               | SD   | Q1      | Median  | Q3      | Min    | Max    | n         | nmiss  | Mean | SD   | Q1      | Median  | Q3     | Min    | Max   |
| Total (n=36)     | Visit day 1      | 36 (100%) | 0 (0%) | -0.1                               | 0.07 | -0.1355 | -0.087  | -0.03   | -0.25  | 0.017  |           |        |      |      |         |         |        |        |       |
|                  | Follow-up day 15 | 36 (100%) | 0 (0%) | -0.1                               | 0.06 | -0.1015 | -0.034  | -0.0075 | -0.233 | 0.033  | 36 (100%) | 0 (0%) | 0    | 0.09 | -0.018  | 0.0325  | 0.0975 | -0.097 | 0.261 |
|                  | Follow-up day 45 | 36 (100%) | 0 (0%) | -0.1                               | 0.08 | -0.124  | -0.0875 | -0.0235 | -0.25  | 0.014  | 36 (100%) | 0 (0%) | 0    | 0.11 | -0.0545 | -0.0055 | 0.0715 | -0.229 | 0.23  |
| NBMI100mg (n=13) | Visit day 1      | 13 (100%) | 0 (0%) | -0.1                               | 0.06 | -0.135  | -0.109  | -0.081  | -0.166 | 0.017  |           |        |      |      |         |         |        |        |       |
|                  | Follow-up day 15 | 13 (100%) | 0 (0%) | -0.1                               | 0.08 | -0.104  | -0.043  | -0.026  | -0.233 | 0.016  | 13 (100%) | 0 (0%) | 0    | 0.07 | -0.014  | 0.026   | 0.083  | -0.068 | 0.142 |
|                  | Follow-up day 45 | 13 (100%) | 0 (0%) | -0.1                               | 0.08 | -0.126  | -0.079  | -0.043  | -0.25  | 0.002  | 13 (100%) | 0 (0%) | 0    | 0.08 | -0.051  | -0.011  | 0.06   | -0.146 | 0.137 |
| NBMI300mg (n=11) | Visit day 1      | 11 (100%) | 0 (0%) | -0.1                               | 0.09 | -0.199  | -0.088  | -0.02   | -0.244 | 0.009  |           |        |      |      |         |         |        |        |       |
|                  | Follow-up day 15 | 11 (100%) | 0 (0%) | 0                                  | 0.05 | -0.101  | -0.033  | 0.005   | -0.105 | 0.033  | 11 (100%) | 0 (0%) | 0.1  | 0.09 | 0.002   | 0.064   | 0.128  | -0.084 | 0.204 |
|                  | Follow-up day 45 | 11 (100%) | 0 (0%) | -0.1                               | 0.09 | -0.205  | -0.094  | -0.013  | -0.25  | 0.014  | 11 (100%) | 0 (0%) | 0    | 0.14 | -0.104  | -0.007  | 0.137  | -0.229 | 0.229 |
| Placebo (n=12)   | Visit day 1      | 12 (100%) | 0 (0%) | -0.1                               | 0.08 | -0.107  | -0.081  | -0.03   | -0.25  | 0.008  |           |        |      |      |         |         |        |        |       |
|                  | Follow-up day 15 | 12 (100%) | 0 (0%) | -0.1                               | 0.06 | -0.0765 | -0.034  | -0.019  | -0.2   | 0.012  | 12 (100%) | 0 (0%) | 0    | 0.1  | -0.0305 | 0.0295  | 0.075  | -0.097 | 0.261 |
|                  | Follow-up day 45 | 12 (100%) | 0 (0%) | -0.1                               | 0.07 | -0.119  | -0.094  | -0.018  | -0.249 | -0.013 | 12 (100%) | 0 (0%) | 0    | 0.11 | -0.039  | 0.0015  | 0.0715 | -0.216 | 0.23  |

Executed script: \\SDS-SERVER2\SAS\$\SDS3\Projects\STATISTICS DRUG DEV\NBMI4011 - CTI002\Analyser\Script\SAS\T\_cat001.sas, on: 23MAY2016:14:00, by: maria.lidsell  
Version of source data: nbmi\_neu.sas7bdat, last modified: 24FEB16:23:13, status: Final

Table DE5.30.1 Change from baseline of NMB, Rhythmic test fast P/S, Left hand, Standard Deviation (Full analysis set)

| Treatment        | Visit            | Result    |        | Change from baseline (Visit day 1) |      |        |        |        |       |       |           |        |      |      |         |         |        |        |       |  |
|------------------|------------------|-----------|--------|------------------------------------|------|--------|--------|--------|-------|-------|-----------|--------|------|------|---------|---------|--------|--------|-------|--|
|                  |                  | n         | nmiss  | Mean                               | SD   | Q1     | Median | Q3     | Min   | Max   | n         | nmiss  | Mean | SD   | Q1      | Median  | Q3     | Min    | Max   |  |
| Total (n=36)     | Visit day 1      | 36 (100%) | 0 (0%) | 0.1                                | 0.05 | 0.046  | 0.095  | 0.128  | 0     | 0.151 |           |        |      |      |         |         |        |        |       |  |
|                  | Follow-up day 15 | 36 (100%) | 0 (0%) | 0.1                                | 0.04 | 0.025  | 0.064  | 0.108  | 0.012 | 0.136 | 36 (100%) | 0 (0%) | 0    | 0.06 | -0.0665 | -0.0035 | 0.0235 | -0.129 | 0.1   |  |
|                  | Follow-up day 45 | 36 (100%) | 0 (0%) | 0.1                                | 0.05 | 0.021  | 0.059  | 0.112  | 0     | 0.155 | 36 (100%) | 0 (0%) | 0    | 0.05 | -0.051  | -0.0155 | 0.0025 | -0.12  | 0.1   |  |
| NBMI100mg (n=13) | Visit day 1      | 13 (100%) | 0 (0%) | 0.1                                | 0.03 | 0.103  | 0.12   | 0.131  | 0.019 | 0.138 |           |        |      |      |         |         |        |        |       |  |
|                  | Follow-up day 15 | 13 (100%) | 0 (0%) | 0.1                                | 0.04 | 0.03   | 0.066  | 0.11   | 0.017 | 0.135 | 13 (100%) | 0 (0%) | 0    | 0.04 | -0.071  | -0.036  | -0.003 | -0.108 | 0.018 |  |
|                  | Follow-up day 45 | 13 (100%) | 0 (0%) | 0.1                                | 0.04 | 0.031  | 0.084  | 0.11   | 0     | 0.133 | 13 (100%) | 0 (0%) | 0    | 0.05 | -0.053  | -0.028  | -0.002 | -0.12  | 0.057 |  |
| NBMI300mg (n=11) | Visit day 1      | 11 (100%) | 0 (0%) | 0.1                                | 0.04 | 0.025  | 0.077  | 0.095  | 0.021 | 0.121 |           |        |      |      |         |         |        |        |       |  |
|                  | Follow-up day 15 | 11 (100%) | 0 (0%) | 0.1                                | 0.05 | 0.019  | 0.062  | 0.123  | 0.015 | 0.136 | 11 (100%) | 0 (0%) | 0    | 0.06 | -0.062  | 0.009   | 0.032  | -0.094 | 0.1   |  |
|                  | Follow-up day 45 | 11 (100%) | 0 (0%) | 0.1                                | 0.05 | 0.015  | 0.05   | 0.112  | 0     | 0.155 | 11 (100%) | 0 (0%) | 0    | 0.06 | -0.07   | -0.006  | 0.014  | -0.095 | 0.078 |  |
| Placebo (n=12)   | Visit day 1      | 12 (100%) | 0 (0%) | 0.1                                | 0.06 | 0.021  | 0.089  | 0.132  | 0     | 0.151 |           |        |      |      |         |         |        |        |       |  |
|                  | Follow-up day 15 | 12 (100%) | 0 (0%) | 0.1                                | 0.04 | 0.0245 | 0.0595 | 0.0975 | 0.012 | 0.119 | 12 (100%) | 0 (0%) | 0    | 0.07 | -0.07   | 0.0005  | 0.028  | -0.129 | 0.07  |  |
|                  | Follow-up day 45 | 12 (100%) | 0 (0%) | 0.1                                | 0.04 | 0.025  | 0.056  | 0.113  | 0.003 | 0.127 | 12 (100%) | 0 (0%) | 0    | 0.05 | -0.041  | -0.0225 | 0.0155 | -0.086 | 0.1   |  |

Executed script: \\SDS-SERVER2\SAS\$\SDS3\Projects\STATISTICS DRUG DEV\NBMI4011 - CTI002\Analyser\Script\SAS\T\_cat001.sas, on: 23MAY2016:14:00, by: maria.lidsell  
Version of source data: nbmi\_neu.sas7bdat, last modified: 24FEB16:23:13, status: Final

Table DE5.31.1 Change from baseline of NMB, Rhythmic test fast P/S, Left hand, P Index (Full analysis set)

| Treatment        | Visit            | Result    |        | Change from baseline (Visit day 1) |       |      |        |       |     |     |           |        |      |       |      |        |      |      |     |
|------------------|------------------|-----------|--------|------------------------------------|-------|------|--------|-------|-----|-----|-----------|--------|------|-------|------|--------|------|------|-----|
|                  |                  | n         | nmiss  | Mean                               | SD    | Q1   | Median | Q3    | Min | Max | n         | nmiss  | Mean | SD    | Q1   | Median | Q3   | Min  | Max |
| Total (n=36)     | Visit day 1      | 36 (100%) | 0 (0%) | 47.9                               | 56.28 | 7    | 18.5   | 84    | 4   | 167 |           |        |      |       |      |        |      |      |     |
|                  | Follow-up day 15 | 36 (100%) | 0 (0%) | 68.7                               | 58.02 | 13   | 46.5   | 131.5 | 6   | 153 | 36 (100%) | 0 (0%) | 20.8 | 69.61 | -10  | 3.5    | 82   | -131 | 134 |
|                  | Follow-up day 45 | 36 (100%) | 0 (0%) | 69.8                               | 60.45 | 11   | 54     | 139.5 | 3   | 167 | 36 (100%) | 0 (0%) | 21.9 | 64.23 | -0.5 | 8      | 52   | -141 | 158 |
| NBMI100mg (n=13) | Visit day 1      | 13 (100%) | 0 (0%) | 23.3                               | 38.32 | 6    | 9      | 15    | 5   | 143 |           |        |      |       |      |        |      |      |     |
|                  | Follow-up day 15 | 13 (100%) | 0 (0%) | 65.9                               | 57.26 | 12   | 44     | 121   | 6   | 147 | 13 (100%) | 0 (0%) | 42.6 | 48.43 | 1    | 32     | 86   | -5   | 129 |
|                  | Follow-up day 45 | 13 (100%) | 0 (0%) | 56.5                               | 61.33 | 12   | 26     | 117   | 6   | 167 | 13 (100%) | 0 (0%) | 33.2 | 71.36 | 1    | 7      | 94   | -110 | 158 |
| NBMI300mg (n=11) | Visit day 1      | 11 (100%) | 0 (0%) | 57.3                               | 53.1  | 18   | 31     | 132   | 9   | 140 |           |        |      |       |      |        |      |      |     |
|                  | Follow-up day 15 | 11 (100%) | 0 (0%) | 65.7                               | 62.24 | 8    | 49     | 142   | 6   | 149 | 11 (100%) | 0 (0%) | 8.5  | 83.2  | -45  | -2     | 118  | -131 | 127 |
|                  | Follow-up day 45 | 11 (100%) | 0 (0%) | 84.4                               | 61.91 | 11   | 69     | 149   | 3   | 167 | 11 (100%) | 0 (0%) | 27.1 | 64.45 | -28  | 9      | 59   | -43  | 149 |
| Placebo (n=12)   | Visit day 1      | 12 (100%) | 0 (0%) | 65.9                               | 68.96 | 6    | 22.5   | 138   | 4   | 167 |           |        |      |       |      |        |      |      |     |
|                  | Follow-up day 15 | 12 (100%) | 0 (0%) | 74.5                               | 59.66 | 17.5 | 59     | 133   | 9   | 153 | 12 (100%) | 0 (0%) | 8.6  | 75.43 | -30  | -1     | 50.5 | -104 | 134 |
|                  | Follow-up day 45 | 12 (100%) | 0 (0%) | 71                                 | 60.13 | 11   | 60.5   | 129.5 | 7   | 164 | 12 (100%) | 0 (0%) | 5.1  | 57.53 | -9.5 | 12.5   | 47   | -141 | 75  |

Executed script: \\SDS-SERVER2\SAS\$\SDS3\Projects\STATISTICS DRUG DEV\NBMI4011 - CTI002\Analyser\Script\SAS\T\_cat001.sas, on: 23MAY2016:14:00, by: maria.lidsell  
Version of source data: nbmi\_neu.sas7bdat, last modified: 24FEB16:23:13, status: Final

Table DE5.32.1 Change from baseline of NMB, Rhythmic test slow - Finger tapping, Right hand, Average Time (Full analysis set)

| Treatment        | Visit            | Result    |        | Change from baseline (Visit day 1) |      |         |         |         |        |        |           |        |      |      |         |        |        |        |       |  |
|------------------|------------------|-----------|--------|------------------------------------|------|---------|---------|---------|--------|--------|-----------|--------|------|------|---------|--------|--------|--------|-------|--|
|                  |                  | n         | nmiss  | Mean                               | SD   | Q1      | Median  | Q3      | Min    | Max    | n         | nmiss  | Mean | SD   | Q1      | Median | Q3     | Min    | Max   |  |
| Total (n=36)     | Visit day 1      | 36 (100%) | 0 (0%) | -0.1                               | 0.09 | -0.148  | -0.061  | -0.0155 | -0.25  | 0.077  |           |        |      |      |         |        |        |        |       |  |
|                  | Follow-up day 15 | 36 (100%) | 0 (0%) | -0.1                               | 0.07 | -0.0965 | -0.058  | -0.0125 | -0.239 | 0.107  | 36 (100%) | 0 (0%) | 0    | 0.09 | -0.026  | 0.008  | 0.0835 | -0.166 | 0.207 |  |
|                  | Follow-up day 45 | 36 (100%) | 0 (0%) | -0.1                               | 0.1  | -0.098  | -0.0335 | -0.0025 | -0.25  | 0.177  | 36 (100%) | 0 (0%) | 0    | 0.13 | -0.05   | 0.0285 | 0.1115 | -0.281 | 0.265 |  |
| NBMI100mg (n=13) | Visit day 1      | 13 (100%) | 0 (0%) | -0.1                               | 0.07 | -0.156  | -0.087  | -0.048  | -0.23  | -0.007 |           |        |      |      |         |        |        |        |       |  |
|                  | Follow-up day 15 | 13 (100%) | 0 (0%) | -0.1                               | 0.08 | -0.145  | -0.068  | -0.029  | -0.239 | 0.016  | 13 (100%) | 0 (0%) | 0    | 0.09 | -0.022  | 0.006  | 0.054  | -0.155 | 0.207 |  |
|                  | Follow-up day 45 | 13 (100%) | 0 (0%) | 0                                  | 0.13 | -0.1    | -0.023  | 0.015   | -0.25  | 0.177  | 13 (100%) | 0 (0%) | 0.1  | 0.15 | 0.031   | 0.044  | 0.179  | -0.243 | 0.265 |  |
| NBMI300mg (n=11) | Visit day 1      | 11 (100%) | 0 (0%) | -0.1                               | 0.1  | -0.14   | -0.028  | 0.014   | -0.25  | 0.035  |           |        |      |      |         |        |        |        |       |  |
|                  | Follow-up day 15 | 11 (100%) | 0 (0%) | 0                                  | 0.07 | -0.059  | -0.017  | 0       | -0.157 | 0.107  | 11 (100%) | 0 (0%) | 0    | 0.09 | -0.043  | 0.048  | 0.14   | -0.091 | 0.191 |  |
|                  | Follow-up day 45 | 11 (100%) | 0 (0%) | -0.1                               | 0.11 | -0.212  | -0.031  | -0.003  | -0.25  | 0.064  | 11 (100%) | 0 (0%) | 0    | 0.14 | -0.066  | 0.008  | 0.07   | -0.281 | 0.204 |  |
| Placebo (n=12)   | Visit day 1      | 12 (100%) | 0 (0%) | -0.1                               | 0.1  | -0.154  | -0.041  | 0.0065  | -0.202 | 0.077  |           |        |      |      |         |        |        |        |       |  |
|                  | Follow-up day 15 | 12 (100%) | 0 (0%) | -0.1                               | 0.06 | -0.097  | -0.072  | -0.0135 | -0.112 | 0.073  | 12 (100%) | 0 (0%) | 0    | 0.1  | -0.026  | 0.008  | 0.0835 | -0.166 | 0.18  |  |
|                  | Follow-up day 45 | 12 (100%) | 0 (0%) | 0                                  | 0.03 | -0.0635 | -0.0375 | -0.0195 | -0.096 | 0.011  | 12 (100%) | 0 (0%) | 0    | 0.09 | -0.0545 | 0.0195 | 0.0965 | -0.123 | 0.163 |  |

Executed script: \\SDS-SERVER2\SAS\$\SDS3\Projects\STATISTICS DRUG DEV\NBMI4011 - CTI002\Analyser\Script\SAS\T\_cat001.sas, on: 23MAY2016:14:00, by: maria.lidsell  
Version of source data: nbmi\_neu.sas7bdat, last modified: 24FEB16:23:13, status: Final

Table DE5.33.1 Change from baseline of NMB, Rhythmic test slow - Finger tapping, Right hand, Standard Deviation (Full analysis set)

| Treatment        | Visit            | Result    |        | Change from baseline (Visit day 1) |      |        |        |        |       |       |           |        |      |      |         |         |        |        |       |  |
|------------------|------------------|-----------|--------|------------------------------------|------|--------|--------|--------|-------|-------|-----------|--------|------|------|---------|---------|--------|--------|-------|--|
|                  |                  | n         | nmiss  | Mean                               | SD   | Q1     | Median | Q3     | Min   | Max   | n         | nmiss  | Mean | SD   | Q1      | Median  | Q3     | Min    | Max   |  |
| Total (n=36)     | Visit day 1      | 36 (100%) | 0 (0%) | 0.1                                | 0.05 | 0.0315 | 0.059  | 0.094  | 0     | 0.196 |           |        |      |      |         |         |        |        |       |  |
|                  | Follow-up day 15 | 36 (100%) | 0 (0%) | 0.1                                | 0.04 | 0.038  | 0.044  | 0.085  | 0.025 | 0.193 | 36 (100%) | 0 (0%) | 0    | 0.04 | -0.02   | 0.0005  | 0.022  | -0.155 | 0.059 |  |
|                  | Follow-up day 45 | 36 (100%) | 0 (0%) | 0.1                                | 0.04 | 0.0435 | 0.058  | 0.0815 | 0     | 0.139 | 36 (100%) | 0 (0%) | 0    | 0.06 | -0.0295 | -0.0015 | 0.025  | -0.168 | 0.112 |  |
| NBMI100mg (n=13) | Visit day 1      | 13 (100%) | 0 (0%) | 0.1                                | 0.06 | 0.05   | 0.076  | 0.151  | 0.031 | 0.196 |           |        |      |      |         |         |        |        |       |  |
|                  | Follow-up day 15 | 13 (100%) | 0 (0%) | 0.1                                | 0.05 | 0.04   | 0.044  | 0.094  | 0.025 | 0.193 | 13 (100%) | 0 (0%) | 0    | 0.06 | -0.036  | -0.017  | -0.001 | -0.155 | 0.042 |  |
|                  | Follow-up day 45 | 13 (100%) | 0 (0%) | 0.1                                | 0.04 | 0.037  | 0.048  | 0.075  | 0     | 0.126 | 13 (100%) | 0 (0%) | 0    | 0.06 | -0.076  | -0.025  | 0.002  | -0.168 | 0.026 |  |
| NBMI300mg (n=11) | Visit day 1      | 11 (100%) | 0 (0%) | 0.1                                | 0.05 | 0.02   | 0.04   | 0.086  | 0     | 0.131 |           |        |      |      |         |         |        |        |       |  |
|                  | Follow-up day 15 | 11 (100%) | 0 (0%) | 0.1                                | 0.04 | 0.035  | 0.041  | 0.054  | 0.028 | 0.163 | 11 (100%) | 0 (0%) | 0    | 0.03 | -0.021  | 0.005   | 0.032  | -0.07  | 0.041 |  |
|                  | Follow-up day 45 | 11 (100%) | 0 (0%) | 0.1                                | 0.03 | 0.047  | 0.061  | 0.081  | 0     | 0.128 | 11 (100%) | 0 (0%) | 0    | 0.05 | -0.006  | 0       | 0.061  | -0.086 | 0.079 |  |
| Placebo (n=12)   | Visit day 1      | 12 (100%) | 0 (0%) | 0.1                                | 0.03 | 0.0305 | 0.0585 | 0.0725 | 0.026 | 0.095 |           |        |      |      |         |         |        |        |       |  |
|                  | Follow-up day 15 | 12 (100%) | 0 (0%) | 0.1                                | 0.03 | 0.042  | 0.064  | 0.094  | 0.028 | 0.121 | 12 (100%) | 0 (0%) | 0    | 0.03 | -0.0005 | 0.0095  | 0.033  | -0.032 | 0.059 |  |
|                  | Follow-up day 45 | 12 (100%) | 0 (0%) | 0.1                                | 0.04 | 0.0485 | 0.066  | 0.0955 | 0.034 | 0.139 | 12 (100%) | 0 (0%) | 0    | 0.05 | -0.0165 | 0.008   | 0.0525 | -0.061 | 0.112 |  |

Executed script: \\SDS-SERVER2\SAS\$\SDS3\Projects\STATISTICS DRUG DEV\NBMI4011 - CTI002\Analyser\Script\SAS\T\_cat001.sas, on: 23MAY2016:14:00, by: maria.lidsell  
Version of source data: nbmi\_neu.sas7bdat, last modified: 24FEB16:23:13, status: Final

Table DE5.34.1 Change from baseline of NMB, Rhythmic test slow - Finger tapping, Right hand, P Index (Full analysis set)

| Treatment        | Visit            | Result    |        | Change from baseline (Visit day 1) |       |      |        |       |     |     |           |        |       |       |       |        |      |      |     |  |
|------------------|------------------|-----------|--------|------------------------------------|-------|------|--------|-------|-----|-----|-----------|--------|-------|-------|-------|--------|------|------|-----|--|
|                  |                  | n         | nmiss  | Mean                               | SD    | Q1   | Median | Q3    | Min | Max | n         | nmiss  | Mean  | SD    | Q1    | Median | Q3   | Min  | Max |  |
| Total (n=36)     | Visit day 1      | 36 (100%) | 0 (0%) | 86.1                               | 55.66 | 35.5 | 85.5   | 142   | 3   | 173 |           |        |       |       |       |        |      |      |     |  |
|                  | Follow-up day 15 | 36 (100%) | 0 (0%) | 93                                 | 48.19 | 45.5 | 119.5  | 130   | 3   | 150 | 36 (100%) | 0 (0%) | 6.9   | 47.46 | -20   | -1.5   | 35.5 | -95  | 123 |  |
|                  | Follow-up day 45 | 36 (100%) | 0 (0%) | 86.8                               | 48    | 49.5 | 88     | 122   | 12  | 173 | 36 (100%) | 0 (0%) | 0.7   | 78.16 | -47   | 0.5    | 31.5 | -137 | 167 |  |
| NBMI100mg (n=13) | Visit day 1      | 13 (100%) | 0 (0%) | 61.4                               | 53.21 | 9    | 57     | 108   | 3   | 143 |           |        |       |       |       |        |      |      |     |  |
|                  | Follow-up day 15 | 13 (100%) | 0 (0%) | 92                                 | 52.97 | 36   | 120    | 127   | 3   | 150 | 13 (100%) | 0 (0%) | 30.6  | 48.03 | 0     | 21     | 42   | -33  | 123 |  |
|                  | Follow-up day 45 | 13 (100%) | 0 (0%) | 100                                | 52.26 | 58   | 113    | 132   | 16  | 173 | 13 (100%) | 0 (0%) | 38.6  | 70.37 | -7    | 11     | 98   | -53  | 167 |  |
| NBMI300mg (n=11) | Visit day 1      | 11 (100%) | 0 (0%) | 103.9                              | 63.1  | 44   | 127    | 156   | 14  | 173 |           |        |       |       |       |        |      |      |     |  |
|                  | Follow-up day 15 | 11 (100%) | 0 (0%) | 108.8                              | 43.51 | 99   | 126    | 137   | 6   | 147 | 11 (100%) | 0 (0%) | 4.9   | 40.4  | -22   | -6     | 45   | -47  | 83  |  |
|                  | Follow-up day 45 | 11 (100%) | 0 (0%) | 86.2                               | 45.7  | 50   | 81     | 113   | 15  | 173 | 11 (100%) | 0 (0%) | -17.7 | 80.46 | -98   | 0      | 11   | -120 | 129 |  |
| Placebo (n=12)   | Visit day 1      | 12 (100%) | 0 (0%) | 96.4                               | 44.67 | 62   | 87     | 143.5 | 35  | 150 |           |        |       |       |       |        |      |      |     |  |
|                  | Follow-up day 15 | 12 (100%) | 0 (0%) | 79.6                               | 46.46 | 36.5 | 76.5   | 125   | 18  | 147 | 12 (100%) | 0 (0%) | -16.8 | 43.41 | -44   | -15.5  | 1.5  | -95  | 64  |  |
|                  | Follow-up day 45 | 12 (100%) | 0 (0%) | 73                                 | 45.14 | 37   | 72.5   | 110   | 12  | 138 | 12 (100%) | 0 (0%) | -23.4 | 74.01 | -82.5 | -14    | 27.5 | -137 | 103 |  |

Executed script: \\SDS-SERVER2\SAS\$\SDS3\Projects\STATISTICS DRUG DEV\NBMI4011 - CTI002\Analyser\Script\SAS\T\_cat001.sas, on: 23MAY2016:14:00, by: maria.lidsell  
Version of source data: nbmi\_neu.sas7bdat, last modified: 24FEB16:23:13, status: Final



Table DE5.35.1 Change from baseline of NMB, Rhythmic test slow - Finger tapping, Left hand, Average Time (Full analysis set)

| Treatment        | Visit            | Result    |        |      |      |         |         |         |        |       | Change from baseline (Visit day 1) |        |      |       |         |        |        |         |        |
|------------------|------------------|-----------|--------|------|------|---------|---------|---------|--------|-------|------------------------------------|--------|------|-------|---------|--------|--------|---------|--------|
|                  |                  | n         | nmiss  | Mean | SD   | Q1      | Median  | Q3      | Min    | Max   | n                                  | nmiss  | Mean | SD    | Q1      | Median | Q3     | Min     | Max    |
| Total (n=36)     | Visit day 1      | 36 (100%) | 0 (0%) | -1.3 | 7.15 | -0.1845 | -0.0645 | -0.013  | -43    | 0.068 |                                    |        |      |       |         |        |        |         |        |
|                  | Follow-up day 15 | 36 (100%) | 0 (0%) | -1.2 | 6.99 | -0.1165 | -0.0565 | -0.0135 | -42    | 0.04  | 36 (100%)                          | 0 (0%) | 0.1  | 10.15 | -0.0205 | 0.0345 | 0.0795 | -41.991 | 42.914 |
|                  | Follow-up day 45 | 36 (100%) | 0 (0%) | -0.1 | 0.1  | -0.1415 | -0.0375 | -0.0065 | -0.25  | 0.191 | 36 (100%)                          | 0 (0%) | 1.2  | 7.13  | -0.015  | 0.017  | 0.1015 | -0.218  | 42.775 |
| NBMI100mg (n=13) | Visit day 1      | 13 (100%) | 0 (0%) | -3.4 | 11.9 | -0.195  | -0.09   | -0.035  | -43    | 0.012 |                                    |        |      |       |         |        |        |         |        |
|                  | Follow-up day 15 | 13 (100%) | 0 (0%) | -0.1 | 0.08 | -0.086  | -0.063  | -0.022  | -0.248 | 0.022 | 13 (100%)                          | 0 (0%) | 3.3  | 11.89 | -0.028  | 0.045  | 0.088  | -0.075  | 42.914 |
|                  | Follow-up day 45 | 13 (100%) | 0 (0%) | -0.1 | 0.1  | -0.151  | -0.046  | -0.006  | -0.225 | 0.135 | 13 (100%)                          | 0 (0%) | 3.3  | 11.85 | -0.007  | 0.053  | 0.189  | -0.114  | 42.775 |
| NBMI300mg (n=11) | Visit day 1      | 11 (100%) | 0 (0%) | -0.1 | 0.11 | -0.219  | -0.046  | 0.008   | -0.25  | 0.024 |                                    |        |      |       |         |        |        |         |        |
|                  | Follow-up day 15 | 11 (100%) | 0 (0%) | 0    | 0.06 | -0.019  | -0.01   | 0.001   | -0.148 | 0.04  | 11 (100%)                          | 0 (0%) | 0.1  | 0.09  | -0.018  | 0.051  | 0.107  | -0.027  | 0.242  |
|                  | Follow-up day 45 | 11 (100%) | 0 (0%) | -0.1 | 0.13 | -0.21   | -0.116  | -0.007  | -0.25  | 0.191 | 11 (100%)                          | 0 (0%) | 0    | 0.17  | -0.177  | 0.006  | 0.087  | -0.218  | 0.373  |
| Placebo (n=12)   | Visit day 1      | 12 (100%) | 0 (0%) | -0.1 | 0.08 | -0.128  | -0.0445 | -0.011  | -0.206 | 0.068 |                                    |        |      |       |         |        |        |         |        |
|                  | Follow-up day 15 | 12 (100%) | 0 (0%) | -3.6 | 12.1 | -0.128  | -0.098  | -0.041  | -42    | 0.027 | 12 (100%)                          | 0 (0%) | -3.5 | 12.12 | -0.071  | 0.0015 | 0.042  | -41.991 | 0.112  |
|                  | Follow-up day 45 | 12 (100%) | 0 (0%) | 0    | 0.06 | -0.065  | -0.025  | -0.0005 | -0.215 | 0.017 | 12 (100%)                          | 0 (0%) | 0    | 0.09  | 0.0045  | 0.0205 | 0.078  | -0.165  | 0.175  |

Executed script: \\SDS-SERVER2\SAS\$\SDS3\Projects\STATISTICS DRUG DEV\NBMI4011 - CTI002\Analyser\Script\SAS\T\_cat001.sas, on: 23MAY2016:14:00, by: maria.lidsell  
Version of source data: nbmi\_neu.sas7bdat, last modified: 24FEB16:23:13, status: Final

Table DE5.36.1 Change from baseline of NMB, Rhythmic test slow - Finger tapping, Left hand, Standard Deviation (Full analysis set)

| Treatment        | Visit            | Result    |        | Change from baseline (Visit day 1) |      |        |        |        |       |       |           |        |      |      |         |         |        |        |       |  |
|------------------|------------------|-----------|--------|------------------------------------|------|--------|--------|--------|-------|-------|-----------|--------|------|------|---------|---------|--------|--------|-------|--|
|                  |                  | n         | nmiss  | Mean                               | SD   | Q1     | Median | Q3     | Min   | Max   | n         | nmiss  | Mean | SD   | Q1      | Median  | Q3     | Min    | Max   |  |
| Total (n=36)     | Visit day 1      | 36 (100%) | 0 (0%) | 0.1                                | 0.04 | 0.039  | 0.0505 | 0.0905 | 0     | 0.165 |           |        |      |      |         |         |        |        |       |  |
|                  | Follow-up day 15 | 36 (100%) | 0 (0%) | 0.1                                | 0.04 | 0.037  | 0.054  | 0.085  | 0.005 | 0.163 | 36 (100%) | 0 (0%) | 0    | 0.06 | -0.0155 | -0.0035 | 0.023  | -0.126 | 0.103 |  |
|                  | Follow-up day 45 | 36 (100%) | 0 (0%) | 0.1                                | 0.03 | 0.0345 | 0.063  | 0.0885 | 0     | 0.142 | 36 (100%) | 0 (0%) | 0    | 0.05 | -0.0335 | 0.001   | 0.034  | -0.124 | 0.087 |  |
| NBMI100mg (n=13) | Visit day 1      | 13 (100%) | 0 (0%) | 0.1                                | 0.05 | 0.042  | 0.059  | 0.131  | 0.019 | 0.165 |           |        |      |      |         |         |        |        |       |  |
|                  | Follow-up day 15 | 13 (100%) | 0 (0%) | 0.1                                | 0.05 | 0.044  | 0.05   | 0.086  | 0.005 | 0.153 | 13 (100%) | 0 (0%) | 0    | 0.07 | -0.065  | 0.001   | 0.019  | -0.126 | 0.103 |  |
|                  | Follow-up day 45 | 13 (100%) | 0 (0%) | 0.1                                | 0.03 | 0.037  | 0.07   | 0.104  | 0.035 | 0.142 | 13 (100%) | 0 (0%) | 0    | 0.06 | -0.043  | -0.004  | 0.025  | -0.124 | 0.086 |  |
| NBMI300mg (n=11) | Visit day 1      | 11 (100%) | 0 (0%) | 0                                  | 0.04 | 0.021  | 0.038  | 0.082  | 0     | 0.111 |           |        |      |      |         |         |        |        |       |  |
|                  | Follow-up day 15 | 11 (100%) | 0 (0%) | 0.1                                | 0.03 | 0.035  | 0.068  | 0.091  | 0.022 | 0.126 | 11 (100%) | 0 (0%) | 0    | 0.06 | -0.014  | -0.001  | 0.084  | -0.084 | 0.095 |  |
|                  | Follow-up day 45 | 11 (100%) | 0 (0%) | 0                                  | 0.03 | 0.025  | 0.046  | 0.078  | 0     | 0.091 | 11 (100%) | 0 (0%) | 0    | 0.04 | -0.025  | 0       | 0.053  | -0.082 | 0.06  |  |
| Placebo (n=12)   | Visit day 1      | 12 (100%) | 0 (0%) | 0.1                                | 0.03 | 0.0425 | 0.0545 | 0.073  | 0.03  | 0.143 |           |        |      |      |         |         |        |        |       |  |
|                  | Follow-up day 15 | 12 (100%) | 0 (0%) | 0.1                                | 0.04 | 0.037  | 0.054  | 0.0655 | 0.023 | 0.163 | 12 (100%) | 0 (0%) | 0    | 0.04 | -0.022  | -0.007  | 0.0005 | -0.053 | 0.099 |  |
|                  | Follow-up day 45 | 12 (100%) | 0 (0%) | 0.1                                | 0.03 | 0.033  | 0.0635 | 0.089  | 0.026 | 0.133 | 12 (100%) | 0 (0%) | 0    | 0.05 | -0.0345 | 0.013   | 0.034  | -0.098 | 0.087 |  |

Executed script: \\SDS-SERVER2\SAS\$\SDS3\Projects\STATISTICS DRUG DEV\NBMI4011 - CTI002\Analyser\Script\SAS\T\_cat001.sas, on: 23MAY2016:14:00, by: maria.lidsell  
Version of source data: nbmi\_neu.sas7bdat, last modified: 24FEB16:23:13, status: Final

Table DE5.37.1 Change from baseline of NMB, Rhythmic test slow - Finger tapping, Left hand, P Index (Full analysis set)

| Treatment        | Visit            | Result    |        | Change from baseline (Visit day 1) |       |      |        |       |     |     |           |        |       |        |       |        |      |      |     |
|------------------|------------------|-----------|--------|------------------------------------|-------|------|--------|-------|-----|-----|-----------|--------|-------|--------|-------|--------|------|------|-----|
|                  |                  | n         | nmiss  | Mean                               | SD    | Q1   | Median | Q3    | Min | Max | n         | nmiss  | Mean  | SD     | Q1    | Median | Q3   | Min  | Max |
| Total (n=36)     | Visit day 1      | 36 (100%) | 0 (0%) | 82                                 | 63.22 | 14   | 86     | 130   | 0   | 188 |           |        |       |        |       |        |      |      |     |
|                  | Follow-up day 15 | 36 (100%) | 0 (0%) | 79.8                               | 59.05 | 18   | 71.5   | 135.5 | 1   | 185 | 36 (100%) | 0 (0%) | -2.3  | 80.18  | -30   | 10.5   | 32.5 | -176 | 183 |
|                  | Follow-up day 45 | 36 (100%) | 0 (0%) | 80.6                               | 65.87 | 17.5 | 67     | 145   | 1   | 188 | 36 (100%) | 0 (0%) | -1.4  | 89     | -70.5 | -2     | 55   | -165 | 168 |
| NBMI100mg (n=13) | Visit day 1      | 13 (100%) | 0 (0%) | 66.2                               | 65.4  | 2    | 57     | 121   | 0   | 172 |           |        |       |        |       |        |      |      |     |
|                  | Follow-up day 15 | 13 (100%) | 0 (0%) | 76.8                               | 59.38 | 17   | 89     | 114   | 1   | 185 | 13 (100%) | 0 (0%) | 10.7  | 81.88  | -16   | -1     | 35   | -105 | 183 |
|                  | Follow-up day 45 | 13 (100%) | 0 (0%) | 68.7                               | 63.39 | 7    | 37     | 138   | 1   | 155 | 13 (100%) | 0 (0%) | 2.5   | 96.1   | -65   | 5      | 21   | -165 | 155 |
| NBMI300mg (n=11) | Visit day 1      | 11 (100%) | 0 (0%) | 108.6                              | 70.26 | 20   | 133    | 169   | 6   | 188 |           |        |       |        |       |        |      |      |     |
|                  | Follow-up day 15 | 11 (100%) | 0 (0%) | 75.3                               | 65.99 | 13   | 38     | 143   | 3   | 168 | 11 (100%) | 0 (0%) | -33.4 | 104.93 | -148  | 0      | 18   | -176 | 154 |
|                  | Follow-up day 45 | 11 (100%) | 0 (0%) | 101.6                              | 70.96 | 25   | 106    | 164   | 14  | 188 | 11 (100%) | 0 (0%) | -7    | 94.51  | -113  | 0      | 56   | -138 | 168 |
| Placebo (n=12)   | Visit day 1      | 12 (100%) | 0 (0%) | 74.8                               | 49.99 | 32.5 | 70.5   | 118.5 | 1   | 153 |           |        |       |        |       |        |      |      |     |
|                  | Follow-up day 15 | 12 (100%) | 0 (0%) | 87                                 | 56.58 | 45   | 71.5   | 137   | 1   | 166 | 12 (100%) | 0 (0%) | 12.3  | 41.69  | -0.5  | 13.5   | 40.5 | -79  | 63  |
|                  | Follow-up day 45 | 12 (100%) | 0 (0%) | 74.3                               | 64.74 | 15.5 | 49.5   | 147   | 2   | 162 | 12 (100%) | 0 (0%) | -0.5  | 83.42  | -72   | -19.5  | 72   | -103 | 142 |

Executed script: \\SDS-SERVER2\SAS\$\SDS3\Projects\STATISTICS DRUG DEV\NBMI4011 - CTI002\Analyser\Script\SAS\T\_cat001.sas, on: 23MAY2016:14:00, by: maria.lidsell  
Version of source data: nbmi\_neu.sas7bdat, last modified: 24FEB16:23:13, status: Final

Table DE5.38.1 Change from baseline of NMB, Rhythmic test fast - Finger tapping, Right hand, Average Time (Full analysis set)

| Treatment        | Visit            | Result    |        |      |      |         |         |         |        |        | Change from baseline (Visit day 1) |        |      |      |         |         |       |        |       |
|------------------|------------------|-----------|--------|------|------|---------|---------|---------|--------|--------|------------------------------------|--------|------|------|---------|---------|-------|--------|-------|
|                  |                  | n         | nmiss  | Mean | SD   | Q1      | Median  | Q3      | Min    | Max    | n                                  | nmiss  | Mean | SD   | Q1      | Median  | Q3    | Min    | Max   |
| Total (n=36)     | Visit day 1      | 36 (100%) | 0 (0%) | -0.1 | 0.08 | -0.15   | -0.0865 | -0.0295 | -0.249 | 0.046  |                                    |        |      |      |         |         |       |        |       |
|                  | Follow-up day 15 | 36 (100%) | 0 (0%) | -0.1 | 0.07 | -0.1315 | -0.0925 | -0.033  | -0.243 | 0.012  | 36 (100%)                          | 0 (0%) | 0    | 0.09 | -0.0555 | 0       | 0.041 | -0.241 | 0.154 |
|                  | Follow-up day 45 | 36 (100%) | 0 (0%) | -0.1 | 0.08 | -0.158  | -0.066  | -0.036  | -0.25  | 0.015  | 36 (100%)                          | 0 (0%) | 0    | 0.1  | -0.0795 | -0.0015 | 0.076 | -0.239 | 0.179 |
| NBMI100mg (n=13) | Visit day 1      | 13 (100%) | 0 (0%) | -0.1 | 0.08 | -0.157  | -0.101  | -0.047  | -0.242 | 0.03   |                                    |        |      |      |         |         |       |        |       |
|                  | Follow-up day 15 | 13 (100%) | 0 (0%) | -0.1 | 0.08 | -0.169  | -0.091  | -0.036  | -0.241 | -0.005 | 13 (100%)                          | 0 (0%) | 0    | 0.09 | -0.035  | 0.013   | 0.05  | -0.241 | 0.121 |
|                  | Follow-up day 45 | 13 (100%) | 0 (0%) | -0.1 | 0.08 | -0.164  | -0.089  | -0.052  | -0.237 | 0.004  | 13 (100%)                          | 0 (0%) | 0    | 0.1  | -0.08   | -0.012  | 0.074 | -0.158 | 0.179 |
| NBMI300mg (n=11) | Visit day 1      | 11 (100%) | 0 (0%) | -0.1 | 0.09 | -0.182  | -0.058  | -0.011  | -0.249 | 0.011  |                                    |        |      |      |         |         |       |        |       |
|                  | Follow-up day 15 | 11 (100%) | 0 (0%) | -0.1 | 0.08 | -0.114  | -0.096  | -0.013  | -0.243 | 0.012  | 11 (100%)                          | 0 (0%) | 0    | 0.09 | -0.056  | 0.016   | 0.068 | -0.156 | 0.154 |
|                  | Follow-up day 45 | 11 (100%) | 0 (0%) | -0.1 | 0.09 | -0.218  | -0.093  | -0.029  | -0.25  | -0.006 | 11 (100%)                          | 0 (0%) | 0    | 0.12 | -0.087  | 0.009   | 0.072 | -0.239 | 0.137 |
| Placebo (n=12)   | Visit day 1      | 12 (100%) | 0 (0%) | -0.1 | 0.07 | -0.123  | -0.087  | -0.027  | -0.208 | 0.046  |                                    |        |      |      |         |         |       |        |       |
|                  | Follow-up day 15 | 12 (100%) | 0 (0%) | -0.1 | 0.04 | -0.1315 | -0.102  | -0.0735 | -0.172 | -0.028 | 12 (100%)                          | 0 (0%) | 0    | 0.08 | -0.0705 | -0.0055 | 0.01  | -0.191 | 0.117 |
|                  | Follow-up day 45 | 12 (100%) | 0 (0%) | -0.1 | 0.06 | -0.0785 | -0.0495 | -0.036  | -0.192 | 0.015  | 12 (100%)                          | 0 (0%) | 0    | 0.1  | -0.0515 | 0.005   | 0.102 | -0.166 | 0.157 |

Executed script: \\SDS-SERVER2\SAS\$\SDS3\Projects\STATISTICS DRUG DEV\NBMI4011 - CTI002\Analyser\Script\SAS\T\_cat001.sas, on: 23MAY2016:14:00, by: maria.lidsell  
Version of source data: nbmi\_neu.sas7bdat, last modified: 24FEB16:23:13, status: Final

Table DE5.39.1 Change from baseline of NMB, Rhythmic test fast - Finger tapping, Right hand, Standard Deviation (Full analysis set)

| Treatment        | Visit            | Result    |        | Change from baseline (Visit day 1) |      |        |        |        |       |       |           |        |      |      |         |         |        |        |       |  |
|------------------|------------------|-----------|--------|------------------------------------|------|--------|--------|--------|-------|-------|-----------|--------|------|------|---------|---------|--------|--------|-------|--|
|                  |                  | n         | nmiss  | Mean                               | SD   | Q1     | Median | Q3     | Min   | Max   | n         | nmiss  | Mean | SD   | Q1      | Median  | Q3     | Min    | Max   |  |
| Total (n=36)     | Visit day 1      | 36 (100%) | 0 (0%) | 0.1                                | 0.03 | 0.02   | 0.0475 | 0.083  | 0.002 | 0.113 |           |        |      |      |         |         |        |        |       |  |
|                  | Follow-up day 15 | 36 (100%) | 0 (0%) | 0.1                                | 0.04 | 0.022  | 0.0455 | 0.0955 | 0.01  | 0.146 | 36 (100%) | 0 (0%) | 0    | 0.05 | -0.024  | -0.001  | 0.035  | -0.097 | 0.115 |  |
|                  | Follow-up day 45 | 36 (100%) | 0 (0%) | 0                                  | 0.03 | 0.018  | 0.0405 | 0.0795 | 0     | 0.116 | 36 (100%) | 0 (0%) | 0    | 0.04 | -0.0365 | -0.0005 | 0.0285 | -0.079 | 0.085 |  |
| NBMI100mg (n=13) | Visit day 1      | 13 (100%) | 0 (0%) | 0.1                                | 0.03 | 0.04   | 0.069  | 0.09   | 0.015 | 0.113 |           |        |      |      |         |         |        |        |       |  |
|                  | Follow-up day 15 | 13 (100%) | 0 (0%) | 0                                  | 0.04 | 0.025  | 0.04   | 0.055  | 0.011 | 0.123 | 13 (100%) | 0 (0%) | 0    | 0.04 | -0.048  | -0.004  | 0.012  | -0.077 | 0.033 |  |
|                  | Follow-up day 45 | 13 (100%) | 0 (0%) | 0.1                                | 0.04 | 0.022  | 0.058  | 0.092  | 0.012 | 0.116 | 13 (100%) | 0 (0%) | 0    | 0.05 | -0.041  | 0       | 0.025  | -0.079 | 0.076 |  |
| NBMI300mg (n=11) | Visit day 1      | 11 (100%) | 0 (0%) | 0                                  | 0.04 | 0.018  | 0.039  | 0.082  | 0.002 | 0.111 |           |        |      |      |         |         |        |        |       |  |
|                  | Follow-up day 15 | 11 (100%) | 0 (0%) | 0.1                                | 0.05 | 0.014  | 0.026  | 0.101  | 0.012 | 0.146 | 11 (100%) | 0 (0%) | 0    | 0.05 | -0.031  | -0.003  | 0.052  | -0.097 | 0.099 |  |
|                  | Follow-up day 45 | 11 (100%) | 0 (0%) | 0                                  | 0.04 | 0.013  | 0.026  | 0.074  | 0     | 0.104 | 11 (100%) | 0 (0%) | 0    | 0.04 | -0.03   | -0.008  | 0.02   | -0.06  | 0.072 |  |
| Placebo (n=12)   | Visit day 1      | 12 (100%) | 0 (0%) | 0                                  | 0.03 | 0.02   | 0.033  | 0.071  | 0.013 | 0.097 |           |        |      |      |         |         |        |        |       |  |
|                  | Follow-up day 15 | 12 (100%) | 0 (0%) | 0.1                                | 0.04 | 0.0305 | 0.0805 | 0.0995 | 0.01  | 0.135 | 12 (100%) | 0 (0%) | 0    | 0.04 | -0.002  | 0.021   | 0.0505 | -0.028 | 0.115 |  |
|                  | Follow-up day 45 | 12 (100%) | 0 (0%) | 0                                  | 0.03 | 0.018  | 0.03   | 0.0715 | 0.013 | 0.105 | 12 (100%) | 0 (0%) | 0    | 0.05 | -0.0365 | -0.001  | 0.038  | -0.077 | 0.085 |  |

Executed script: \\SDS-SERVER2\SAS\$\SDS3\Projects\STATISTICS DRUG DEV\NBMI4011 - CTI002\Analyser\Script\SAS\T\_cat001.sas, on: 23MAY2016:14:00, by: maria.lidsell  
Version of source data: nbmi\_neu.sas7bdat, last modified: 24FEB16:23:13, status: Final

Table DE5.40.1 Change from baseline of NMB, Rhythmic test fast - Finger tapping, Right hand, P Index (Full analysis set)

| Treatment        | Visit            | Result    |        |      |       |     |        |       |     |     | Change from baseline (Visit day 1) |        |       |       |      |        |      |      |     |
|------------------|------------------|-----------|--------|------|-------|-----|--------|-------|-----|-----|------------------------------------|--------|-------|-------|------|--------|------|------|-----|
|                  |                  | n         | nmiss  | Mean | SD    | Q1  | Median | Q3    | Min | Max | n                                  | nmiss  | Mean  | SD    | Q1   | Median | Q3   | Min  | Max |
| Total (n=36)     | Visit day 1      | 36 (100%) | 0 (0%) | 49   | 57.68 | 2   | 18.5   | 111.5 | 0   | 174 |                                    |        |       |       |      |        |      |      |     |
|                  | Follow-up day 15 | 36 (100%) | 0 (0%) | 53.8 | 59.36 | 1   | 22.5   | 100   | 0   | 154 | 36 (100%)                          | 0 (0%) | 4.8   | 63.49 | -5.5 | 1.5    | 28.5 | -173 | 143 |
|                  | Follow-up day 45 | 36 (100%) | 0 (0%) | 60   | 62.7  | 2   | 29     | 124   | 0   | 177 | 36 (100%)                          | 0 (0%) | 11.1  | 77.8  | -25  | 0.5    | 64.5 | -171 | 167 |
| NBMI100mg (n=13) | Visit day 1      | 13 (100%) | 0 (0%) | 30.5 | 48.36 | 1   | 4      | 31    | 0   | 138 |                                    |        |       |       |      |        |      |      |     |
|                  | Follow-up day 15 | 13 (100%) | 0 (0%) | 54.9 | 58.47 | 11  | 31     | 83    | 0   | 152 | 13 (100%)                          | 0 (0%) | 24.4  | 50.08 | -1   | 9      | 38   | -58  | 143 |
|                  | Follow-up day 45 | 13 (100%) | 0 (0%) | 44.6 | 58.95 | 1   | 9      | 100   | 0   | 148 | 13 (100%)                          | 0 (0%) | 14.1  | 59.51 | -15  | -1     | 25   | -71  | 147 |
| NBMI300mg (n=11) | Visit day 1      | 11 (100%) | 0 (0%) | 54.6 | 65.27 | 2   | 33     | 122   | 0   | 174 |                                    |        |       |       |      |        |      |      |     |
|                  | Follow-up day 15 | 11 (100%) | 0 (0%) | 71.6 | 61.1  | 1   | 75     | 143   | 0   | 149 | 11 (100%)                          | 0 (0%) | 17    | 79.04 | -5   | 18     | 65   | -173 | 143 |
|                  | Follow-up day 45 | 11 (100%) | 0 (0%) | 73.1 | 71.09 | 3   | 75     | 144   | 0   | 177 | 11 (100%)                          | 0 (0%) | 18.5  | 97.46 | -47  | 1      | 111  | -171 | 167 |
| Placebo (n=12)   | Visit day 1      | 12 (100%) | 0 (0%) | 63.8 | 59.06 | 4.5 | 52.5   | 113.5 | 1   | 147 |                                    |        |       |       |      |        |      |      |     |
|                  | Follow-up day 15 | 12 (100%) | 0 (0%) | 36.3 | 58.6  | 1   | 2.5    | 60    | 0   | 154 | 12 (100%)                          | 0 (0%) | -27.5 | 51.68 | -68  | -1     | 2.5  | -114 | 25  |
|                  | Follow-up day 45 | 12 (100%) | 0 (0%) | 64.8 | 60.38 | 4   | 64.5   | 122   | 0   | 146 | 12 (100%)                          | 0 (0%) | 1     | 81.15 | -67  | 3      | 65   | -113 | 119 |

Executed script: \\SDS-SERVER2\SAS\$\SDS3\Projects\STATISTICS DRUG DEV\NBMI4011 - CTI002\Analyser\Script\SAS\T\_cat001.sas, on: 23MAY2016:14:00, by: maria.lidsell  
Version of source data: nbmi\_neu.sas7bdat, last modified: 24FEB16:23:13, status: Final

Table DE5.41.1 Change from baseline of NMB, Rhythmic test fast - Finger tapping, Left hand, Average Time (Full analysis set)

| Treatment        | Visit            | Result    |        | Change from baseline (Visit day 1) |      |         |         |         |        |        |           |        |      |      |         |        |        |        |         |      |
|------------------|------------------|-----------|--------|------------------------------------|------|---------|---------|---------|--------|--------|-----------|--------|------|------|---------|--------|--------|--------|---------|------|
|                  |                  | n         | nmiss  | Mean                               | SD   | Q1      | Median  | Q3      | Min    | Max    | n         | nmiss  | Mean | SD   | Q1      | Median | Q3     | Min    | Max     |      |
| Total (n=36)     | Visit day 1      | 36 (100%) | 0 (0%) | -0.1                               | 0.08 | -0.145  | -0.0835 | -0.0355 | -0.25  | 0.007  |           |        |      |      |         |        |        |        |         |      |
|                  | Follow-up day 15 | 36 (100%) | 0 (0%) | -0.1                               | 0.08 | -0.1355 | -0.055  | -0.0275 | -0.245 | 0.015  | 36 (100%) | 0 (0%) | 0    | 0.08 | -0.0225 | 0.0085 | 0.065  | -0.196 | 0.162   |      |
|                  | Follow-up day 45 | 36 (100%) | 0 (0%) | -0.8                               | 4.32 | -0.1335 | -0.062  | -0.0315 | -26    | -0.009 | 36 (100%) | 0 (0%) | 0    | -0.7 | 4.34    | -0.036 | 0.0235 | 0.0835 | -26.005 | 0.15 |
| NBMI100mg (n=13) | Visit day 1      | 13 (100%) | 0 (0%) | -0.1                               | 0.08 | -0.156  | -0.094  | -0.044  | -0.25  | 0.007  |           |        |      |      |         |        |        |        |         |      |
|                  | Follow-up day 15 | 13 (100%) | 0 (0%) | -0.1                               | 0.09 | -0.194  | -0.074  | -0.026  | -0.245 | 0.009  | 13 (100%) | 0 (0%) | 0    | 0.08 | -0.002  | 0.018  | 0.063  | -0.196 | 0.12    |      |
|                  | Follow-up day 45 | 13 (100%) | 0 (0%) | -0.1                               | 0.08 | -0.14   | -0.064  | -0.029  | -0.245 | -0.009 | 13 (100%) | 0 (0%) | 0    | 0.11 | -0.016  | 0.032  | 0.102  | -0.187 | 0.148   |      |
| NBMI300mg (n=11) | Visit day 1      | 11 (100%) | 0 (0%) | -0.1                               | 0.09 | -0.161  | -0.058  | -0.01   | -0.248 | 0.005  |           |        |      |      |         |        |        |        |         |      |
|                  | Follow-up day 15 | 11 (100%) | 0 (0%) | -0.1                               | 0.08 | -0.128  | -0.074  | -0.029  | -0.245 | 0.015  | 11 (100%) | 0 (0%) | 0    | 0.08 | -0.025  | 0.01   | 0.067  | -0.103 | 0.148   |      |
|                  | Follow-up day 45 | 11 (100%) | 0 (0%) | -2.5                               | 7.81 | -0.204  | -0.132  | -0.055  | -26    | -0.018 | 11 (100%) | 0 (0%) | 0    | -2.4 | 7.84    | -0.146 | -0.019 | 0.038  | -26.005 | 0.15 |
| Placebo (n=12)   | Visit day 1      | 12 (100%) | 0 (0%) | -0.1                               | 0.06 | -0.107  | -0.0745 | -0.0315 | -0.215 | -0.02  |           |        |      |      |         |        |        |        |         |      |
|                  | Follow-up day 15 | 12 (100%) | 0 (0%) | -0.1                               | 0.07 | -0.094  | -0.052  | -0.028  | -0.218 | -0.003 | 12 (100%) | 0 (0%) | 0    | 0.08 | -0.0525 | 0.003  | 0.0625 | -0.113 | 0.162   |      |
|                  | Follow-up day 45 | 12 (100%) | 0 (0%) | -0.1                               | 0.03 | -0.0625 | -0.048  | -0.03   | -0.131 | -0.02  | 12 (100%) | 0 (0%) | 0    | 0.06 | -0.0095 | 0.029  | 0.0575 | -0.098 | 0.123   |      |

Executed script: \\SDS-SERVER2\SAS\$\SDS3\Projects\STATISTICS DRUG DEV\NBMI4011 - CTI002\Analyser\Script\SAS\T\_cat001.sas, on: 23MAY2016:14:00, by: maria.lidsell  
Version of source data: nbmi\_neu.sas7bdat, last modified: 24FEB16:23:13, status: Final

Table DE5.42.1 Change from baseline of NMB, Rhythmic test fast - Finger tapping, Left hand, Standard Deviation (Full analysis set)

| Treatment        | Visit            | Result    |        | Change from baseline (Visit day 1) |      |        |        |        |       |       |           |        |      |      |         |         |        |        |       |  |
|------------------|------------------|-----------|--------|------------------------------------|------|--------|--------|--------|-------|-------|-----------|--------|------|------|---------|---------|--------|--------|-------|--|
|                  |                  | n         | nmiss  | Mean                               | SD   | Q1     | Median | Q3     | Min   | Max   | n         | nmiss  | Mean | SD   | Q1      | Median  | Q3     | Min    | Max   |  |
| Total (n=36)     | Visit day 1      | 36 (100%) | 0 (0%) | 0.1                                | 0.04 | 0.024  | 0.0585 | 0.0825 | 0     | 0.13  |           |        |      |      |         |         |        |        |       |  |
|                  | Follow-up day 15 | 36 (100%) | 0 (0%) | 0.1                                | 0.04 | 0.0145 | 0.054  | 0.082  | 0.011 | 0.126 | 36 (100%) | 0 (0%) | 0    | 0.03 | -0.014  | -0.0025 | 0.0045 | -0.101 | 0.063 |  |
|                  | Follow-up day 45 | 36 (100%) | 0 (0%) | 0.1                                | 0.04 | 0.021  | 0.0445 | 0.0845 | 0.011 | 0.136 | 36 (100%) | 0 (0%) | 0    | 0.05 | -0.0465 | -0.001  | 0.0315 | -0.107 | 0.086 |  |
| NBMI100mg (n=13) | Visit day 1      | 13 (100%) | 0 (0%) | 0.1                                | 0.04 | 0.027  | 0.069  | 0.08   | 0     | 0.127 |           |        |      |      |         |         |        |        |       |  |
|                  | Follow-up day 15 | 13 (100%) | 0 (0%) | 0.1                                | 0.04 | 0.016  | 0.056  | 0.09   | 0.012 | 0.115 | 13 (100%) | 0 (0%) | 0    | 0.04 | -0.014  | -0.001  | 0.016  | -0.068 | 0.054 |  |
|                  | Follow-up day 45 | 13 (100%) | 0 (0%) | 0.1                                | 0.04 | 0.026  | 0.048  | 0.082  | 0.013 | 0.115 | 13 (100%) | 0 (0%) | 0    | 0.06 | -0.065  | -0.003  | 0.041  | -0.101 | 0.082 |  |
| NBMI300mg (n=11) | Visit day 1      | 11 (100%) | 0 (0%) | 0.1                                | 0.04 | 0.015  | 0.053  | 0.082  | 0.008 | 0.13  |           |        |      |      |         |         |        |        |       |  |
|                  | Follow-up day 15 | 11 (100%) | 0 (0%) | 0.1                                | 0.04 | 0.015  | 0.052  | 0.084  | 0.012 | 0.126 | 11 (100%) | 0 (0%) | 0    | 0.03 | -0.014  | -0.003  | 0.006  | -0.046 | 0.063 |  |
|                  | Follow-up day 45 | 11 (100%) | 0 (0%) | 0.1                                | 0.04 | 0.03   | 0.078  | 0.098  | 0.011 | 0.136 | 11 (100%) | 0 (0%) | 0    | 0.04 | -0.013  | 0.006   | 0.045  | -0.042 | 0.086 |  |
| Placebo (n=12)   | Visit day 1      | 12 (100%) | 0 (0%) | 0.1                                | 0.04 | 0.024  | 0.0495 | 0.087  | 0.01  | 0.13  |           |        |      |      |         |         |        |        |       |  |
|                  | Follow-up day 15 | 12 (100%) | 0 (0%) | 0                                  | 0.03 | 0.013  | 0.044  | 0.075  | 0.011 | 0.087 | 12 (100%) | 0 (0%) | 0    | 0.04 | -0.0135 | -0.003  | -0.001 | -0.101 | 0.057 |  |
|                  | Follow-up day 45 | 12 (100%) | 0 (0%) | 0                                  | 0.03 | 0.016  | 0.0255 | 0.053  | 0.013 | 0.105 | 12 (100%) | 0 (0%) | 0    | 0.05 | -0.051  | -0.009  | 0.005  | -0.107 | 0.061 |  |

Executed script: \\SDS-SERVER2\SAS\$\SDS3\Projects\STATISTICS DRUG DEV\NBMI4011 - CTI002\Analyser\Script\SAS\T\_cat001.sas, on: 23MAY2016:14:00, by: maria.lidsell  
Version of source data: nbmi\_neu.sas7bdat, last modified: 24FEB16:23:13, status: Final



Table DE5.43.1 Change from baseline of NMB, Rhythmic test fast - Finger tapping, Left hand, P Index (Full analysis set)

| Treatment        | Visit            | Result    |        |      |       |      |        |       |     |     | Change from baseline (Visit day 1) |        |       |       |      |        |      |      |     |
|------------------|------------------|-----------|--------|------|-------|------|--------|-------|-----|-----|------------------------------------|--------|-------|-------|------|--------|------|------|-----|
|                  |                  | n         | nmiss  | Mean | SD    | Q1   | Median | Q3    | Min | Max | n                                  | nmiss  | Mean  | SD    | Q1   | Median | Q3   | Min  | Max |
| Total (n=36)     | Visit day 1      | 36 (100%) | 0 (0%) | 59.5 | 56.95 | 12   | 30     | 111   | 2   | 165 |                                    |        |       |       |      |        |      |      |     |
|                  | Follow-up day 15 | 36 (100%) | 0 (0%) | 68.4 | 60.04 | 12   | 36     | 137.5 | 2   | 145 | 36 (100%)                          | 0 (0%) | 8.9   | 54.73 | -5.5 | 2      | 20.5 | -133 | 137 |
|                  | Follow-up day 45 | 36 (100%) | 0 (0%) | 65.2 | 54.15 | 11   | 51.5   | 120.5 | 2   | 146 | 36 (100%)                          | 0 (0%) | 5.7   | 77.72 | -37  | 0      | 74   | -153 | 127 |
| NBMI100mg (n=13) | Visit day 1      | 13 (100%) | 0 (0%) | 49.8 | 55.8  | 13   | 20     | 100   | 2   | 165 |                                    |        |       |       |      |        |      |      |     |
|                  | Follow-up day 15 | 13 (100%) | 0 (0%) | 64.2 | 62.62 | 9    | 33     | 135   | 3   | 143 | 13 (100%)                          | 0 (0%) | 14.4  | 55.56 | -15  | 1      | 22   | -54  | 130 |
|                  | Follow-up day 45 | 13 (100%) | 0 (0%) | 61.8 | 52    | 12   | 45     | 103   | 3   | 141 | 13 (100%)                          | 0 (0%) | 12    | 90.79 | -38  | 0      | 88   | -153 | 127 |
| NBMI300mg (n=11) | Visit day 1      | 11 (100%) | 0 (0%) | 67.6 | 61.98 | 12   | 37     | 138   | 2   | 151 |                                    |        |       |       |      |        |      |      |     |
|                  | Follow-up day 15 | 11 (100%) | 0 (0%) | 67.1 | 60.86 | 11   | 39     | 136   | 2   | 143 | 11 (100%)                          | 0 (0%) | -0.5  | 62.11 | -15  | 2      | 19   | -133 | 93  |
|                  | Follow-up day 45 | 11 (100%) | 0 (0%) | 43.1 | 52.35 | 7    | 14     | 90    | 2   | 146 | 11 (100%)                          | 0 (0%) | -24.5 | 75.68 | -81  | -3     | 8    | -144 | 88  |
| Placebo (n=12)   | Visit day 1      | 12 (100%) | 0 (0%) | 62.5 | 56.95 | 10.5 | 49.5   | 110   | 2   | 148 |                                    |        |       |       |      |        |      |      |     |
|                  | Follow-up day 15 | 12 (100%) | 0 (0%) | 74.1 | 61.37 | 16   | 65.5   | 141.5 | 10  | 145 | 12 (100%)                          | 0 (0%) | 11.6  | 50.25 | 1    | 6      | 18.5 | -92  | 137 |
|                  | Follow-up day 45 | 12 (100%) | 0 (0%) | 89.2 | 52.54 | 40.5 | 106    | 134   | 5   | 143 | 12 (100%)                          | 0 (0%) | 26.7  | 59.8  | -9.5 | 23     | 74   | -93  | 114 |

Executed script: \\SDS-SERVER2\SAS\$\SDS3\Projects\STATISTICS DRUG DEV\NBMI4011 - CTI002\Analyser\Script\SAS\T\_cat001.sas, on: 23MAY2016:14:00, by: maria.lidsell  
Version of source data: nbmi\_neu.sas7bdat, last modified: 24FEB16:23:13, status: Final

Table DE5.44.1 Change from baseline of NMB, Max. Frequency test P/S, Right hand, Max Frequency (Full analysis set)

| Treatment        | Visit            | Result    |        |      |      |      |        |     |     |     | Change from baseline (Visit day 1) |        |      |      |       |        |      |      |     |
|------------------|------------------|-----------|--------|------|------|------|--------|-----|-----|-----|------------------------------------|--------|------|------|-------|--------|------|------|-----|
|                  |                  | n         | nmiss  | Mean | SD   | Q1   | Median | Q3  | Min | Max | n                                  | nmiss  | Mean | SD   | Q1    | Median | Q3   | Min  | Max |
| Total (n=36)     | Visit day 1      | 36 (100%) | 0 (0%) | 5.7  | 1.31 | 4.9  | 5.5    | 7.1 | 3.3 | 7.5 |                                    |        |      |      |       |        |      |      |     |
|                  | Follow-up day 15 | 36 (100%) | 0 (0%) | 6.1  | 1.36 | 5    | 6.55   | 7.5 | 2.9 | 7.5 | 36 (100%)                          | 0 (0%) | 0.4  | 1.46 | -0.45 | 0.05   | 1.1  | -2.8 | 4.2 |
|                  | Follow-up day 45 | 36 (100%) | 0 (0%) | 6.4  | 1.16 | 5.45 | 6.65   | 7.5 | 3.8 | 7.5 | 36 (100%)                          | 0 (0%) | 0.7  | 1.57 | -0.3  | 0.3    | 1.5  | -2   | 4.2 |
| NBMI100mg (n=13) | Visit day 1      | 13 (100%) | 0 (0%) | 5.5  | 1.24 | 4.7  | 5.2    | 6.3 | 3.3 | 7.5 |                                    |        |      |      |       |        |      |      |     |
|                  | Follow-up day 15 | 13 (100%) | 0 (0%) | 5.7  | 1.54 | 4.6  | 5.7    | 7   | 2.9 | 7.5 | 13 (100%)                          | 0 (0%) | 0.2  | 1.34 | -0.5  | 0      | 1.1  | -2.1 | 2.7 |
|                  | Follow-up day 45 | 13 (100%) | 0 (0%) | 6.2  | 1.08 | 5.4  | 6      | 7.5 | 4.4 | 7.5 | 13 (100%)                          | 0 (0%) | 0.8  | 1.55 | 0     | 0.6    | 1.5  | -2   | 4.2 |
| NBMI300mg (n=11) | Visit day 1      | 11 (100%) | 0 (0%) | 6.2  | 1.47 | 5.3  | 6.7    | 7.5 | 3.3 | 7.5 |                                    |        |      |      |       |        |      |      |     |
|                  | Follow-up day 15 | 11 (100%) | 0 (0%) | 6.4  | 1.27 | 4.8  | 6.7    | 7.5 | 4.5 | 7.5 | 11 (100%)                          | 0 (0%) | 0.2  | 1.78 | -0.8  | 0      | 0.8  | -2.8 | 4.2 |
|                  | Follow-up day 45 | 11 (100%) | 0 (0%) | 7    | 0.79 | 6    | 7.5    | 7.5 | 5.5 | 7.5 | 11 (100%)                          | 0 (0%) | 0.8  | 1.72 | 0     | 0.4    | 2.1  | -2   | 4.2 |
| Placebo (n=12)   | Visit day 1      | 12 (100%) | 0 (0%) | 5.6  | 1.21 | 5    | 5.35   | 6.2 | 3.6 | 7.5 |                                    |        |      |      |       |        |      |      |     |
|                  | Follow-up day 15 | 12 (100%) | 0 (0%) | 6.3  | 1.23 | 5.4  | 6.55   | 7.5 | 3.8 | 7.5 | 12 (100%)                          | 0 (0%) | 0.7  | 1.32 | 0.1   | 0.6    | 1.2  | -2.1 | 3.3 |
|                  | Follow-up day 45 | 12 (100%) | 0 (0%) | 6.1  | 1.39 | 5    | 6.05   | 7.5 | 3.8 | 7.5 | 12 (100%)                          | 0 (0%) | 0.5  | 1.58 | -0.8  | 0      | 1.85 | -1.2 | 3.6 |

Executed script: \\SDS-SERVER2\SAS\$\SDS3\Projects\STATISTICS DRUG DEV\NBMI4011 - CTI002\Analyser\Script\SAS\T\_cat001.sas, on: 23MAY2016:14:00, by: maria.lidsell  
Version of source data: nbmi\_neu.sas7bdat, last modified: 24FEB16:23:13, status: Final

Table DE5.45.1 Change from baseline of NMB, Max. Frequency test P/S, Right hand, MF Index (Full analysis set)

| Treatment        | Visit            | Result    |        | Change from baseline (Visit day 1) |       |       |        |       |     |     |           |        |      |       |       |        |      |      |     |  |
|------------------|------------------|-----------|--------|------------------------------------|-------|-------|--------|-------|-----|-----|-----------|--------|------|-------|-------|--------|------|------|-----|--|
|                  |                  | n         | nmiss  | Mean                               | SD    | Q1    | Median | Q3    | Min | Max | n         | nmiss  | Mean | SD    | Q1    | Median | Q3   | Min  | Max |  |
| Total (n=36)     | Visit day 1      | 36 (100%) | 0 (0%) | 135.4                              | 54.76 | 103.5 | 145    | 187.5 | 23  | 192 |           |        |      |       |       |        |      |      |     |  |
|                  | Follow-up day 15 | 36 (100%) | 0 (0%) | 147.2                              | 55.72 | 111   | 179.5  | 192   | 14  | 192 | 36 (100%) | 0 (0%) | 11.8 | 66.84 | -10   | 3      | 43.5 | -130 | 169 |  |
|                  | Follow-up day 45 | 36 (100%) | 0 (0%) | 161.1                              | 43.36 | 142.5 | 181.5  | 192   | 34  | 192 | 36 (100%) | 0 (0%) | 25.7 | 66.95 | -8    | 11.5   | 64   | -115 | 169 |  |
| NBMI100mg (n=13) | Visit day 1      | 13 (100%) | 0 (0%) | 125                                | 55.88 | 85    | 128    | 175   | 23  | 192 |           |        |      |       |       |        |      |      |     |  |
|                  | Follow-up day 15 | 13 (100%) | 0 (0%) | 131.8                              | 66.2  | 76    | 153    | 187   | 14  | 192 | 13 (100%) | 0 (0%) | 6.8  | 63.96 | -30   | 0      | 36   | -127 | 102 |  |
|                  | Follow-up day 45 | 13 (100%) | 0 (0%) | 157.7                              | 40.9  | 140   | 166    | 192   | 62  | 192 | 13 (100%) | 0 (0%) | 32.7 | 73.06 | 0     | 14     | 97   | -115 | 169 |  |
| NBMI300mg (n=11) | Visit day 1      | 11 (100%) | 0 (0%) | 151                                | 56.47 | 134   | 183    | 192   | 23  | 192 |           |        |      |       |       |        |      |      |     |  |
|                  | Follow-up day 15 | 11 (100%) | 0 (0%) | 155.5                              | 49.49 | 94    | 183    | 192   | 69  | 192 | 11 (100%) | 0 (0%) | 4.5  | 76.45 | -51   | 0      | 9    | -107 | 169 |  |
|                  | Follow-up day 45 | 11 (100%) | 0 (0%) | 182.2                              | 16.3  | 166   | 192    | 192   | 145 | 192 | 11 (100%) | 0 (0%) | 31.2 | 61.44 | 0     | 9      | 52   | -47  | 169 |  |
| Placebo (n=12)   | Visit day 1      | 12 (100%) | 0 (0%) | 132.3                              | 53.41 | 113   | 136.5  | 171.5 | 30  | 192 |           |        |      |       |       |        |      |      |     |  |
|                  | Follow-up day 15 | 12 (100%) | 0 (0%) | 156.3                              | 49.31 | 138.5 | 179.5  | 192   | 34  | 192 | 12 (100%) | 0 (0%) | 24   | 64.76 | 6     | 15     | 53   | -130 | 156 |  |
|                  | Follow-up day 45 | 12 (100%) | 0 (0%) | 145.4                              | 56.48 | 109.5 | 165    | 192   | 34  | 192 | 12 (100%) | 0 (0%) | 13.2 | 68.89 | -33.5 | 0      | 64   | -83  | 153 |  |

Executed script: \\SDS-SERVER2\SAS\$\SDS3\Projects\STATISTICS DRUG DEV\NBMI4011 - CTI002\Analyser\Script\SAS\T\_cat001.sas, on: 23MAY2016:14:00, by: maria.lidsell  
Version of source data: nbmi\_neu.sas7bdat, last modified: 24FEB16:23:13, status: Final

Table DE5.46.1 Change from baseline of NMB, Max. Frequency test P/S, Left hand, Max Frequency (Full analysis set)

| Treatment        | Visit            | Result      |           | Change from baseline (Visit day 1) |       |      |        |      |     |     |             |           |      |       |       |        |      |       |     |  |
|------------------|------------------|-------------|-----------|------------------------------------|-------|------|--------|------|-----|-----|-------------|-----------|------|-------|-------|--------|------|-------|-----|--|
|                  |                  | n           | nmiss     | Mean                               | SD    | Q1   | Median | Q3   | Min | Max | n           | nmiss     | Mean | SD    | Q1    | Median | Q3   | Min   | Max |  |
| Total (n=36)     | Visit day 1      | 36 (100%)   | 0 (0%)    | 6.2                                | 6.47  | 3.8  | 5.1    | 6.45 | 3.2 | 43  |             |           |      |       |       |        |      |       |     |  |
|                  | Follow-up day 15 | 36 (100%)   | 0 (0%)    | 6                                  | 1.46  | 4.95 | 6      | 7.5  | 3.3 | 7.5 | 36 (100%)   | 0 (0%)    | -0.3 | 6.93  | -0.2  | 0.7    | 1.85 | -39.4 | 4.3 |  |
|                  | Follow-up day 45 | 35 (97.22%) | 1 (2.78%) | 6                                  | 1.22  | 5.1  | 5.8    | 7.5  | 3.3 | 7.5 | 35 (97.22%) | 1 (2.78%) | -0.3 | 6.65  | -0.1  | 0.6    | 1.6  | -37.5 | 4.3 |  |
| NBMI100mg (n=13) | Visit day 1      | 13 (100%)   | 0 (0%)    | 7.5                                | 10.73 | 3.6  | 4.8    | 5.1  | 3.2 | 43  |             |           |      |       |       |        |      |       |     |  |
|                  | Follow-up day 15 | 13 (100%)   | 0 (0%)    | 5.6                                | 1.43  | 4.3  | 5.4    | 7.2  | 3.6 | 7.5 | 13 (100%)   | 0 (0%)    | -1.8 | 11.36 | 0.2   | 0.9    | 1.8  | -39.4 | 4.3 |  |
|                  | Follow-up day 45 | 12 (92.31%) | 1 (7.69%) | 5.5                                | 1.02  | 4.75 | 5.15   | 6    | 4.4 | 7.5 | 12 (92.31%) | 1 (7.69%) | -2.3 | 11.19 | -0.35 | 0.2    | 1.4  | -37.5 | 4.3 |  |
| NBMI300mg (n=11) | Visit day 1      | 11 (100%)   | 0 (0%)    | 5.9                                | 1.43  | 4.9  | 5.7    | 7.5  | 3.3 | 7.5 |             |           |      |       |       |        |      |       |     |  |
|                  | Follow-up day 15 | 11 (100%)   | 0 (0%)    | 5.7                                | 1.68  | 3.9  | 5.2    | 7.5  | 3.3 | 7.5 | 11 (100%)   | 0 (0%)    | -0.2 | 1.63  | -1.3  | -0.4   | 1.7  | -2.5  | 2.4 |  |
|                  | Follow-up day 45 | 11 (100%)   | 0 (0%)    | 6.7                                | 0.97  | 5.6  | 7.5    | 7.5  | 5.1 | 7.5 | 11 (100%)   | 0 (0%)    | 0.8  | 1.36  | 0     | 0.6    | 1.8  | -1.9  | 3   |  |
| Placebo (n=12)   | Visit day 1      | 12 (100%)   | 0 (0%)    | 5.2                                | 1.65  | 3.7  | 4.6    | 6.9  | 3.5 | 7.5 |             |           |      |       |       |        |      |       |     |  |
|                  | Follow-up day 15 | 12 (100%)   | 0 (0%)    | 6.6                                | 1.14  | 5.6  | 7.4    | 7.5  | 4.5 | 7.5 | 12 (100%)   | 0 (0%)    | 1.4  | 1.96  | 0.15  | 0.9    | 3.3  | -2.3  | 4   |  |
|                  | Follow-up day 45 | 12 (100%)   | 0 (0%)    | 6                                  | 1.39  | 5    | 6      | 7.5  | 3.3 | 7.5 | 12 (100%)   | 0 (0%)    | 0.8  | 1.73  | -0.1  | 0.75   | 1.8  | -2.4  | 4   |  |

Executed script: \\SDS-SERVER2\SAS\$\SDS3\Projects\STATISTICS DRUG DEV\NBMI4011 - CTI002\Analyser\Script\SAS\T\_cat001.sas, on: 23MAY2016:14:00, by: maria.lidsell  
Version of source data: nbmi\_neu.sas7bdat, last modified: 24FEB16:23:13, status: Final

Table DE5.47.1 Change from baseline of NMB, Max. Frequency test P/S, Left hand, MF Index (Full analysis set)

| Treatment        | Visit            | Result    |        |       |       |       |        |       |     |     | Change from baseline (Visit day 1) |        |       |       |      |        |       |      |     |
|------------------|------------------|-----------|--------|-------|-------|-------|--------|-------|-----|-----|------------------------------------|--------|-------|-------|------|--------|-------|------|-----|
|                  |                  | n         | nmiss  | Mean  | SD    | Q1    | Median | Q3    | Min | Max | n                                  | nmiss  | Mean  | SD    | Q1   | Median | Q3    | Min  | Max |
| Total (n=36)     | Visit day 1      | 36 (100%) | 0 (0%) | 116.4 | 66.61 | 40    | 132    | 182.5 | 22  | 195 |                                    |        |       |       |      |        |       |      |     |
|                  | Follow-up day 15 | 36 (100%) | 0 (0%) | 148.6 | 57.33 | 129   | 176    | 195   | 26  | 195 | 36 (100%)                          | 0 (0%) | 32.2  | 67.76 | -5   | 22     | 67    | -85  | 173 |
|                  | Follow-up day 45 | 36 (100%) | 0 (0%) | 154.1 | 48.75 | 132   | 167.5  | 195   | 4   | 195 | 36 (100%)                          | 0 (0%) | 37.7  | 65.64 | -1.5 | 12.5   | 86    | -100 | 173 |
| NBMI100mg (n=13) | Visit day 1      | 13 (100%) | 0 (0%) | 91.5  | 59.7  | 35    | 86     | 139   | 22  | 180 |                                    |        |       |       |      |        |       |      |     |
|                  | Follow-up day 15 | 13 (100%) | 0 (0%) | 135.5 | 60.18 | 68    | 155    | 193   | 35  | 195 | 13 (100%)                          | 0 (0%) | 44.1  | 58.03 | 15   | 34     | 54    | -33  | 173 |
|                  | Follow-up day 45 | 13 (100%) | 0 (0%) | 129.9 | 53.16 | 107   | 139    | 159   | 4   | 195 | 13 (100%)                          | 0 (0%) | 38.5  | 80.18 | -18  | 13     | 91    | -100 | 173 |
| NBMI300mg (n=11) | Visit day 1      | 11 (100%) | 0 (0%) | 151.9 | 54.66 | 125   | 166    | 195   | 26  | 195 |                                    |        |       |       |      |        |       |      |     |
|                  | Follow-up day 15 | 11 (100%) | 0 (0%) | 136   | 68.33 | 46    | 145    | 195   | 26  | 195 | 11 (100%)                          | 0 (0%) | -15.9 | 44.39 | -50  | -2     | 29    | -85  | 56  |
|                  | Follow-up day 45 | 11 (100%) | 0 (0%) | 181.5 | 18.97 | 163   | 195    | 195   | 139 | 195 | 11 (100%)                          | 0 (0%) | 29.5  | 47.39 | 0    | 12     | 56    | -32  | 113 |
| Placebo (n=12)   | Visit day 1      | 12 (100%) | 0 (0%) | 111   | 74.06 | 37.5  | 96.5   | 190   | 30  | 195 |                                    |        |       |       |      |        |       |      |     |
|                  | Follow-up day 15 | 12 (100%) | 0 (0%) | 174.4 | 34.3  | 160.5 | 194.5  | 195   | 86  | 195 | 12 (100%)                          | 0 (0%) | 63.4  | 74.83 | 1    | 62     | 133.5 | -50  | 165 |
|                  | Follow-up day 45 | 12 (100%) | 0 (0%) | 155.3 | 52.06 | 132   | 176    | 195   | 26  | 195 | 12 (100%)                          | 0 (0%) | 44.3  | 67.38 | -6   | 26     | 84.5  | -56  | 165 |

Executed script: \\SDS-SERVER2\SAS\$\SDS3\Projects\STATISTICS DRUG DEV\NBMI4011 - CTI002\Analyser\Script\SAS\T\_cat001.sas, on: 23MAY2016:14:00, by: maria.lidsell  
Version of source data: nbmi\_neu.sas7bdat, last modified: 24FEB16:23:13, status: Final

Table DE5.48.1 Change from baseline of NMB, Max. Frequency test - Finger tapping, Right hand, Max Frequency (Full analysis set)

| Treatment        | Visit            | Result      |           | Change from baseline (Visit day 1) |      |      |        |     |     |      |             |           |      |      |       |        |    |      |     |  |
|------------------|------------------|-------------|-----------|------------------------------------|------|------|--------|-----|-----|------|-------------|-----------|------|------|-------|--------|----|------|-----|--|
|                  |                  | n           | nmiss     | Mean                               | SD   | Q1   | Median | Q3  | Min | Max  | n           | nmiss     | Mean | SD   | Q1    | Median | Q3 | Min  | Max |  |
| Total (n=36)     | Visit day 1      | 36 (100%)   | 0 (0%)    | 7.8                                | 0.96 | 8.1  | 8.1    | 8.1 | 3.3 | 8.1  |             |           |      |      |       |        |    |      |     |  |
|                  | Follow-up day 15 | 36 (100%)   | 0 (0%)    | 8                                  | 1.93 | 8.1  | 8.1    | 8.1 | 5.3 | 18.1 | 36 (100%)   | 0 (0%)    | 0.2  | 2.09 | 0     | 0      | 0  | -2.8 | 10  |  |
|                  | Follow-up day 45 | 35 (97.22%) | 1 (2.78%) | 8                                  | 0.58 | 8.1  | 8.1    | 8.1 | 5   | 8.1  | 35 (97.22%) | 1 (2.78%) | 0.1  | 1    | 0     | 0      | 0  | -3.1 | 4.8 |  |
| NBMI100mg (n=13) | Visit day 1      | 13 (100%)   | 0 (0%)    | 7.9                                | 0.86 | 8.1  | 8.1    | 8.1 | 5   | 8.1  |             |           |      |      |       |        |    |      |     |  |
|                  | Follow-up day 15 | 13 (100%)   | 0 (0%)    | 7.7                                | 0.88 | 8.1  | 8.1    | 8.1 | 5.3 | 8.1  | 13 (100%)   | 0 (0%)    | -0.2 | 1.32 | 0     | 0      | 0  | -2.8 | 3.1 |  |
|                  | Follow-up day 45 | 12 (92.31%) | 1 (7.69%) | 7.8                                | 0.89 | 8.1  | 8.1    | 8.1 | 5   | 8.1  | 12 (92.31%) | 1 (7.69%) | -0.3 | 0.89 | 0     | 0      | 0  | -3.1 | 0   |  |
| NBMI300mg (n=11) | Visit day 1      | 11 (100%)   | 0 (0%)    | 8                                  | 0.36 | 8.1  | 8.1    | 8.1 | 6.9 | 8.1  |             |           |      |      |       |        |    |      |     |  |
|                  | Follow-up day 15 | 11 (100%)   | 0 (0%)    | 7.9                                | 0.75 | 8.1  | 8.1    | 8.1 | 5.6 | 8.1  | 11 (100%)   | 0 (0%)    | -0.1 | 0.39 | 0     | 0      | 0  | -1.3 | 0   |  |
|                  | Follow-up day 45 | 11 (100%)   | 0 (0%)    | 8.1                                | 0.03 | 8.1  | 8.1    | 8.1 | 8   | 8.1  | 11 (100%)   | 0 (0%)    | 0.1  | 0.33 | 0     | 0      | 0  | 0    | 1.1 |  |
| Placebo (n=12)   | Visit day 1      | 12 (100%)   | 0 (0%)    | 7.6                                | 1.4  | 8.1  | 8.1    | 8.1 | 3.3 | 8.1  |             |           |      |      |       |        |    |      |     |  |
|                  | Follow-up day 15 | 12 (100%)   | 0 (0%)    | 8.4                                | 3.18 | 7.35 | 8.1    | 8.1 | 5.6 | 18.1 | 12 (100%)   | 0 (0%)    | 0.8  | 3.34 | -0.65 | 0      | 0  | -2   | 10  |  |
|                  | Follow-up day 45 | 12 (100%)   | 0 (0%)    | 8                                  | 0.46 | 8.1  | 8.1    | 8.1 | 6.5 | 8.1  | 12 (100%)   | 0 (0%)    | 0.4  | 1.4  | 0     | 0      | 0  | -0.4 | 4.8 |  |

Executed script: \\SDS-SERVER2\SAS\$\SDS3\Projects\STATISTICS DRUG DEV\NBMI4011 - CTI002\Analyser\Script\SAS\T\_cat001.sas, on: 23MAY2016:14:00, by: maria.lidsell  
Version of source data: nbmi\_neu.sas7bdat, last modified: 24FEB16:23:13, status: Final

Table DE5.49.1 Change from baseline of NMB, Max. Frequency test - Finger tapping, Right hand, MF Index (Full analysis set)

| Treatment        | Visit            | Result    |        |       |       |       |        |     |     |     | Change from baseline (Visit day 1) |        |       |       |      |        |    |      |     |
|------------------|------------------|-----------|--------|-------|-------|-------|--------|-----|-----|-----|------------------------------------|--------|-------|-------|------|--------|----|------|-----|
|                  |                  | n         | nmiss  | Mean  | SD    | Q1    | Median | Q3  | Min | Max | n                                  | nmiss  | Mean  | SD    | Q1   | Median | Q3 | Min  | Max |
| Total (n=36)     | Visit day 1      | 36 (100%) | 0 (0%) | 186.8 | 36.39 | 196   | 196    | 196 | 11  | 196 |                                    |        |       |       |      |        |    |      |     |
|                  | Follow-up day 15 | 36 (100%) | 0 (0%) | 184.9 | 33.88 | 196   | 196    | 196 | 11  | 196 | 36 (100%)                          | 0 (0%) | -1.9  | 50.91 | 0    | 0      | 0  | -185 | 185 |
|                  | Follow-up day 45 | 36 (100%) | 0 (0%) | 186.6 | 37.74 | 196   | 196    | 196 | 2   | 196 | 36 (100%)                          | 0 (0%) | -0.2  | 39.47 | 0    | 0      | 0  | -122 | 185 |
| NBMI100mg (n=13) | Visit day 1      | 13 (100%) | 0 (0%) | 186.6 | 33.84 | 196   | 196    | 196 | 74  | 196 |                                    |        |       |       |      |        |    |      |     |
|                  | Follow-up day 15 | 13 (100%) | 0 (0%) | 179.4 | 50.97 | 196   | 196    | 196 | 11  | 196 | 13 (100%)                          | 0 (0%) | -7.2  | 63.88 | 0    | 0      | 0  | -185 | 122 |
|                  | Follow-up day 45 | 13 (100%) | 0 (0%) | 171.7 | 61.13 | 196   | 196    | 196 | 2   | 196 | 13 (100%)                          | 0 (0%) | -14.9 | 37.83 | 0    | 0      | 0  | -122 | 0   |
| NBMI300mg (n=11) | Visit day 1      | 11 (100%) | 0 (0%) | 194.9 | 3.62  | 196   | 196    | 196 | 184 | 196 |                                    |        |       |       |      |        |    |      |     |
|                  | Follow-up day 15 | 11 (100%) | 0 (0%) | 190.1 | 19.27 | 196   | 196    | 196 | 132 | 196 | 11 (100%)                          | 0 (0%) | -4.8  | 15.65 | 0    | 0      | 0  | -52  | 0   |
|                  | Follow-up day 45 | 11 (100%) | 0 (0%) | 195.9 | 0.3   | 196   | 196    | 196 | 195 | 196 | 11 (100%)                          | 0 (0%) | 1     | 3.32  | 0    | 0      | 0  | 0    | 11  |
| Placebo (n=12)   | Visit day 1      | 12 (100%) | 0 (0%) | 179.5 | 53.2  | 196   | 196    | 196 | 11  | 196 |                                    |        |       |       |      |        |    |      |     |
|                  | Follow-up day 15 | 12 (100%) | 0 (0%) | 186.1 | 20.39 | 186.5 | 196    | 196 | 132 | 196 | 12 (100%)                          | 0 (0%) | 6.6   | 58.75 | -9.5 | 0      | 0  | -51  | 185 |
|                  | Follow-up day 45 | 12 (100%) | 0 (0%) | 194.1 | 6.64  | 196   | 196    | 196 | 173 | 196 | 12 (100%)                          | 0 (0%) | 14.6  | 53.74 | 0    | 0      | 0  | -10  | 185 |

Executed script: \\SDS-SERVER2\SAS\$\SDS3\Projects\STATISTICS DRUG DEV\NBMI4011 - CTI002\Analyser\Script\SAS\T\_cat001.sas, on: 23MAY2016:14:00, by: maria.lidsell  
Version of source data: nbmi\_neu.sas7bdat, last modified: 24FEB16:23:13, status: Final

Table DE5.50.1 Change from baseline of NMB, Max. Frequency test - Finger tapping, Left hand, Max Frequency (Full analysis set)

| Treatment        | Visit            | Result    |        |      |      |      |        |     |     |     | Change from baseline (Visit day 1) |        |      |      |      |        |      |      |     |
|------------------|------------------|-----------|--------|------|------|------|--------|-----|-----|-----|------------------------------------|--------|------|------|------|--------|------|------|-----|
|                  |                  | n         | nmiss  | Mean | SD   | Q1   | Median | Q3  | Min | Max | n                                  | nmiss  | Mean | SD   | Q1   | Median | Q3   | Min  | Max |
| Total (n=36)     | Visit day 1      | 36 (100%) | 0 (0%) | 7.8  | 0.84 | 8.1  | 8.1    | 8.1 | 4.8 | 8.1 |                                    |        |      |      |      |        |      |      |     |
|                  | Follow-up day 15 | 36 (100%) | 0 (0%) | 7.8  | 0.7  | 8.1  | 8.1    | 8.1 | 4.9 | 8.1 | 36 (100%)                          | 0 (0%) | 0.1  | 1.17 | 0    | 0      | 0    | -3.2 | 3.3 |
|                  | Follow-up day 45 | 36 (100%) | 0 (0%) | 7.9  | 0.94 | 8.1  | 8.1    | 8.1 | 3.1 | 8.1 | 36 (100%)                          | 0 (0%) | 0.1  | 1.19 | 0    | 0      | 0    | -3.8 | 3.3 |
| NBMI100mg (n=13) | Visit day 1      | 13 (100%) | 0 (0%) | 7.6  | 1.12 | 8.1  | 8.1    | 8.1 | 4.8 | 8.1 |                                    |        |      |      |      |        |      |      |     |
|                  | Follow-up day 15 | 13 (100%) | 0 (0%) | 7.8  | 0.92 | 8.1  | 8.1    | 8.1 | 4.9 | 8.1 | 13 (100%)                          | 0 (0%) | 0.1  | 1.56 | 0    | 0      | 0    | -3.2 | 3.3 |
|                  | Follow-up day 45 | 13 (100%) | 0 (0%) | 8    | 0.23 | 8.1  | 8.1    | 8.1 | 7.3 | 8.1 | 13 (100%)                          | 0 (0%) | 0.4  | 1.18 | 0    | 0      | 0    | -0.8 | 3.3 |
| NBMI300mg (n=11) | Visit day 1      | 11 (100%) | 0 (0%) | 8    | 0.29 | 8.1  | 8.1    | 8.1 | 7.2 | 8.1 |                                    |        |      |      |      |        |      |      |     |
|                  | Follow-up day 15 | 11 (100%) | 0 (0%) | 8.1  | 0.09 | 8.1  | 8.1    | 8.1 | 7.8 | 8.1 | 11 (100%)                          | 0 (0%) | 0.1  | 0.21 | 0    | 0      | 0    | 0    | 0.6 |
|                  | Follow-up day 45 | 11 (100%) | 0 (0%) | 7.9  | 0.81 | 8.1  | 8.1    | 8.1 | 5.4 | 8.1 | 11 (100%)                          | 0 (0%) | -0.1 | 0.9  | 0    | 0      | 0    | -2.7 | 0.9 |
| Placebo (n=12)   | Visit day 1      | 12 (100%) | 0 (0%) | 7.7  | 0.86 | 7.55 | 8.1    | 8.1 | 5.3 | 8.1 |                                    |        |      |      |      |        |      |      |     |
|                  | Follow-up day 15 | 12 (100%) | 0 (0%) | 7.7  | 0.73 | 7.5  | 8.1    | 8.1 | 6.1 | 8.1 | 12 (100%)                          | 0 (0%) | 0    | 1.28 | -0.6 | 0      | 0.55 | -2   | 2.8 |
|                  | Follow-up day 45 | 12 (100%) | 0 (0%) | 7.7  | 1.44 | 8.1  | 8.1    | 8.1 | 3.1 | 8.1 | 12 (100%)                          | 0 (0%) | 0    | 1.46 | 0    | 0      | 0.05 | -3.8 | 2.8 |

Executed script: \\SDS-SERVER2\SAS\$\SDS3\Projects\STATISTICS DRUG DEV\NBMI4011 - CTI002\Analyser\Script\SAS\T\_cat001.sas, on: 23MAY2016:14:00, by: maria.lidsell  
Version of source data: nbmi\_neu.sas7bdat, last modified: 24FEB16:23:13, status: Final



Table DE5.51.1 Change from baseline of NMB, Max. Frequency test - Finger tapping, Left hand, MF Index (Full analysis set)

| Treatment        | Visit            | Result    |        | Change from baseline (Visit day 1) |       |       |        |     |     |     |           |        |      |       |      |        |     |      |     |
|------------------|------------------|-----------|--------|------------------------------------|-------|-------|--------|-----|-----|-----|-----------|--------|------|-------|------|--------|-----|------|-----|
|                  |                  | n         | nmiss  | Mean                               | SD    | Q1    | Median | Q3  | Min | Max | n         | nmiss  | Mean | SD    | Q1   | Median | Q3  | Min  | Max |
| Total (n=36)     | Visit day 1      | 36 (100%) | 0 (0%) | 189.2                              | 25.46 | 197   | 197    | 197 | 70  | 197 |           |        |      |       |      |        |     |      |     |
|                  | Follow-up day 15 | 36 (100%) | 0 (0%) | 192.1                              | 19.97 | 197   | 197    | 197 | 80  | 197 | 36 (100%) | 0 (0%) | 2.9  | 33.56 | 0    | 0      | 0   | -117 | 127 |
|                  | Follow-up day 45 | 36 (100%) | 0 (0%) | 189.9                              | 32.63 | 197   | 197    | 197 | 10  | 197 | 36 (100%) | 0 (0%) | 0.7  | 41.48 | 0    | 0      | 0   | -177 | 127 |
| NBMI100mg (n=13) | Visit day 1      | 13 (100%) | 0 (0%) | 182.8                              | 37.39 | 197   | 197    | 197 | 70  | 197 |           |        |      |       |      |        |     |      |     |
|                  | Follow-up day 15 | 13 (100%) | 0 (0%) | 187.3                              | 32.34 | 197   | 197    | 197 | 80  | 197 | 13 (100%) | 0 (0%) | 4.5  | 52.35 | 0    | 0      | 0   | -117 | 127 |
|                  | Follow-up day 45 | 13 (100%) | 0 (0%) | 196.5                              | 1.39  | 197   | 197    | 197 | 192 | 197 | 13 (100%) | 0 (0%) | 13.7 | 37.6  | 0    | 0      | 0   | -5   | 127 |
| NBMI300mg (n=11) | Visit day 1      | 11 (100%) | 0 (0%) | 196.3                              | 1.85  | 197   | 197    | 197 | 191 | 197 |           |        |      |       |      |        |     |      |     |
|                  | Follow-up day 15 | 11 (100%) | 0 (0%) | 196.9                              | 0.3   | 197   | 197    | 197 | 196 | 197 | 11 (100%) | 0 (0%) | 0.6  | 1.57  | 0    | 0      | 0   | 0    | 5   |
|                  | Follow-up day 45 | 11 (100%) | 0 (0%) | 191.2                              | 19.3  | 197   | 197    | 197 | 133 | 197 | 11 (100%) | 0 (0%) | -5.1 | 19.62 | 0    | 0      | 0   | -64  | 6   |
| Placebo (n=12)   | Visit day 1      | 12 (100%) | 0 (0%) | 189.5                              | 20.9  | 193.5 | 197    | 197 | 124 | 197 |           |        |      |       |      |        |     |      |     |
|                  | Follow-up day 15 | 12 (100%) | 0 (0%) | 192.8                              | 8.76  | 192.5 | 197    | 197 | 169 | 197 | 12 (100%) | 0 (0%) | 3.3  | 24.14 | -4.5 | 0      | 3.5 | -28  | 73  |
|                  | Follow-up day 45 | 12 (100%) | 0 (0%) | 181.4                              | 53.98 | 197   | 197    | 197 | 10  | 197 | 12 (100%) | 0 (0%) | -8.1 | 57.15 | 0    | 0      | 0   | -177 | 73  |

Executed script: \\SDS-SERVER2\SAS\$\SDS3\Projects\STATISTICS DRUG DEV\NBMI4011 - CTI002\Analyser\Script\SAS\T\_cat001.sas, on: 23MAY2016:14:00, by: maria.lidsell  
Version of source data: nbmi\_neu.sas7bdat, last modified: 24FEB16:23:13, status: Final

Table DE5.52.1 Change from baseline of NMB, Reaction time, Right hand, Average Time (Full analysis set)

| Treatment        | Visit            | Result    |        |      |      |        |        |        |       |       | Change from baseline (Visit day 1) |        |      |      |        |         |         |        |       |
|------------------|------------------|-----------|--------|------|------|--------|--------|--------|-------|-------|------------------------------------|--------|------|------|--------|---------|---------|--------|-------|
|                  |                  | n         | nmiss  | Mean | SD   | Q1     | Median | Q3     | Min   | Max   | n                                  | nmiss  | Mean | SD   | Q1     | Median  | Q3      | Min    | Max   |
| Total (n=36)     | Visit day 1      | 36 (100%) | 0 (0%) | 0.3  | 0.06 | 0.2235 | 0.2445 | 0.259  | 0.205 | 0.552 |                                    |        |      |      |        |         |         |        |       |
|                  | Follow-up day 15 | 36 (100%) | 0 (0%) | 0.2  | 0.04 | 0.224  | 0.236  | 0.266  | 0.18  | 0.354 | 36 (100%)                          | 0 (0%) | 0    | 0.06 | -0.024 | -0.009  | 0.0245  | -0.29  | 0.065 |
|                  | Follow-up day 45 | 36 (100%) | 0 (0%) | 0.3  | 0.03 | 0.2325 | 0.252  | 0.2745 | 0.194 | 0.366 | 36 (100%)                          | 0 (0%) | 0    | 0.07 | -0.017 | 0.0035  | 0.03    | -0.334 | 0.116 |
| NBMI100mg (n=13) | Visit day 1      | 13 (100%) | 0 (0%) | 0.3  | 0.09 | 0.23   | 0.25   | 0.281  | 0.205 | 0.552 |                                    |        |      |      |        |         |         |        |       |
|                  | Follow-up day 15 | 13 (100%) | 0 (0%) | 0.3  | 0.05 | 0.23   | 0.254  | 0.313  | 0.183 | 0.354 | 13 (100%)                          | 0 (0%) | 0    | 0.09 | -0.022 | 0.014   | 0.055   | -0.29  | 0.065 |
|                  | Follow-up day 45 | 13 (100%) | 0 (0%) | 0.3  | 0.04 | 0.235  | 0.253  | 0.277  | 0.218 | 0.366 | 13 (100%)                          | 0 (0%) | 0    | 0.11 | -0.014 | -0.008  | 0.026   | -0.334 | 0.116 |
| NBMI300mg (n=11) | Visit day 1      | 11 (100%) | 0 (0%) | 0.2  | 0.04 | 0.215  | 0.238  | 0.245  | 0.21  | 0.363 |                                    |        |      |      |        |         |         |        |       |
|                  | Follow-up day 15 | 11 (100%) | 0 (0%) | 0.2  | 0.03 | 0.224  | 0.254  | 0.28   | 0.183 | 0.296 | 11 (100%)                          | 0 (0%) | 0    | 0.04 | -0.021 | 0.01    | 0.033   | -0.067 | 0.065 |
|                  | Follow-up day 45 | 11 (100%) | 0 (0%) | 0.3  | 0.03 | 0.242  | 0.252  | 0.272  | 0.194 | 0.284 | 11 (100%)                          | 0 (0%) | 0    | 0.04 | -0.016 | 0.018   | 0.035   | -0.083 | 0.046 |
| Placebo (n=12)   | Visit day 1      | 12 (100%) | 0 (0%) | 0.2  | 0.03 | 0.224  | 0.255  | 0.2575 | 0.208 | 0.291 |                                    |        |      |      |        |         |         |        |       |
|                  | Follow-up day 15 | 12 (100%) | 0 (0%) | 0.2  | 0.02 | 0.213  | 0.231  | 0.2345 | 0.18  | 0.26  | 12 (100%)                          | 0 (0%) | 0    | 0.03 | -0.035 | -0.0205 | -0.0065 | -0.078 | 0.024 |
|                  | Follow-up day 45 | 12 (100%) | 0 (0%) | 0.2  | 0.03 | 0.212  | 0.246  | 0.274  | 0.203 | 0.296 | 12 (100%)                          | 0 (0%) | 0    | 0.03 | -0.024 | 0       | 0.018   | -0.045 | 0.061 |

Executed script: \\SDS-SERVER2\SAS\$\SDS3\Projects\STATISTICS DRUG DEV\NBMI4011 - CTI002\Analyser\Script\SAS\T\_cat001.sas, on: 23MAY2016:14:00, by: maria.lidsell  
Version of source data: nbmi\_neu.sas7bdat, last modified: 24FEB16:23:13, status: Final

Table DE5.53.1 Change from baseline of NMB, Reaction time, Right hand, Standard Deviation (Full analysis set)

| Treatment        | Visit            | Result    |        |      |      |        |        |        |       |       | Change from baseline (Visit day 1) |        |      |      |         |         |        |        |       |
|------------------|------------------|-----------|--------|------|------|--------|--------|--------|-------|-------|------------------------------------|--------|------|------|---------|---------|--------|--------|-------|
|                  |                  | n         | nmiss  | Mean | SD   | Q1     | Median | Q3     | Min   | Max   | n                                  | nmiss  | Mean | SD   | Q1      | Median  | Q3     | Min    | Max   |
| Total (n=36)     | Visit day 1      | 36 (100%) | 0 (0%) | 0.1  | 0.05 | 0.0355 | 0.041  | 0.054  | 0.02  | 0.332 |                                    |        |      |      |         |         |        |        |       |
|                  | Follow-up day 15 | 36 (100%) | 0 (0%) | 0.1  | 0.04 | 0.0295 | 0.038  | 0.0625 | 0.011 | 0.173 | 36 (100%)                          | 0 (0%) | 0    | 0.06 | -0.012  | -0.004  | 0.011  | -0.264 | 0.139 |
|                  | Follow-up day 45 | 36 (100%) | 0 (0%) | 0.1  | 0.05 | 0.0305 | 0.0385 | 0.0665 | 0.014 | 0.313 | 36 (100%)                          | 0 (0%) | 0    | 0.07 | -0.0125 | -0.0015 | 0.016  | -0.297 | 0.261 |
| NBMI100mg (n=13) | Visit day 1      | 13 (100%) | 0 (0%) | 0.1  | 0.08 | 0.034  | 0.039  | 0.052  | 0.023 | 0.332 |                                    |        |      |      |         |         |        |        |       |
|                  | Follow-up day 15 | 13 (100%) | 0 (0%) | 0.1  | 0.05 | 0.034  | 0.055  | 0.106  | 0.011 | 0.173 | 13 (100%)                          | 0 (0%) | 0    | 0.09 | -0.003  | 0.004   | 0.051  | -0.264 | 0.139 |
|                  | Follow-up day 45 | 13 (100%) | 0 (0%) | 0.1  | 0.08 | 0.033  | 0.035  | 0.047  | 0.014 | 0.313 | 13 (100%)                          | 0 (0%) | 0    | 0.12 | -0.01   | -0.002  | 0.016  | -0.297 | 0.261 |
| NBMI300mg (n=11) | Visit day 1      | 11 (100%) | 0 (0%) | 0    | 0.02 | 0.029  | 0.039  | 0.047  | 0.02  | 0.096 |                                    |        |      |      |         |         |        |        |       |
|                  | Follow-up day 15 | 11 (100%) | 0 (0%) | 0    | 0.04 | 0.024  | 0.029  | 0.077  | 0.017 | 0.164 | 11 (100%)                          | 0 (0%) | 0    | 0.03 | -0.02   | -0.009  | 0.006  | -0.023 | 0.068 |
|                  | Follow-up day 45 | 11 (100%) | 0 (0%) | 0    | 0.03 | 0.03   | 0.038  | 0.057  | 0.02  | 0.113 | 11 (100%)                          | 0 (0%) | 0    | 0.04 | -0.018  | -0.009  | 0.024  | -0.058 | 0.082 |
| Placebo (n=12)   | Visit day 1      | 12 (100%) | 0 (0%) | 0.1  | 0.02 | 0.04   | 0.05   | 0.068  | 0.03  | 0.095 |                                    |        |      |      |         |         |        |        |       |
|                  | Follow-up day 15 | 12 (100%) | 0 (0%) | 0    | 0.01 | 0.032  | 0.0455 | 0.0505 | 0.016 | 0.06  | 12 (100%)                          | 0 (0%) | 0    | 0.02 | -0.0205 | -0.0095 | -0.004 | -0.079 | 0.022 |
|                  | Follow-up day 45 | 12 (100%) | 0 (0%) | 0.1  | 0.03 | 0.0275 | 0.06   | 0.079  | 0.018 | 0.109 | 12 (100%)                          | 0 (0%) | 0    | 0.02 | -0.0115 | 0.001   | 0.0165 | -0.031 | 0.037 |

Executed script: \\SDS-SERVER2\SAS\$\SDS3\Projects\STATISTICS DRUG DEV\NBMI4011 - CTI002\Analyser\Script\SAS\T\_cat001.sas, on: 23MAY2016:14:00, by: maria.lidsell  
Version of source data: nbmi\_neu.sas7bdat, last modified: 24FEB16:23:13, status: Final

Table DE5.54.1 Change from baseline of NMB, Reaction time, Right hand, RT Index (Full analysis set)

| Treatment        | Visit            | Result    |        | Change from baseline (Visit day 1) |       |      |        |       |     |     |           |        |       |       |       |        |      |     |     |
|------------------|------------------|-----------|--------|------------------------------------|-------|------|--------|-------|-----|-----|-----------|--------|-------|-------|-------|--------|------|-----|-----|
|                  |                  | n         | nmiss  | Mean                               | SD    | Q1   | Median | Q3    | Min | Max | n         | nmiss  | Mean  | SD    | Q1    | Median | Q3   | Min | Max |
| Total (n=36)     | Visit day 1      | 36 (100%) | 0 (0%) | 49.3                               | 34.32 | 27   | 40.5   | 73    | 0   | 118 |           |        |       |       |       |        |      |     |     |
|                  | Follow-up day 15 | 36 (100%) | 0 (0%) | 54.7                               | 43.96 | 22.5 | 52     | 72    | 2   | 159 | 36 (100%) | 0 (0%) | 5.4   | 42.97 | -24   | 10.5   | 27   | -76 | 131 |
|                  | Follow-up day 45 | 36 (100%) | 0 (0%) | 43.2                               | 34.57 | 17.5 | 33     | 56.5  | 1   | 139 | 36 (100%) | 0 (0%) | -6.1  | 43.68 | -33   | -2.5   | 13.5 | -85 | 84  |
| NBMI100mg (n=13) | Visit day 1      | 13 (100%) | 0 (0%) | 44.5                               | 37.73 | 15   | 34     | 60    | 0   | 118 |           |        |       |       |       |        |      |     |     |
|                  | Follow-up day 15 | 13 (100%) | 0 (0%) | 41.2                               | 43.75 | 6    | 31     | 61    | 2   | 155 | 13 (100%) | 0 (0%) | -3.2  | 32.26 | -28   | -2     | 21   | -56 | 37  |
|                  | Follow-up day 45 | 13 (100%) | 0 (0%) | 34.1                               | 24.6  | 16   | 32     | 52    | 1   | 84  | 13 (100%) | 0 (0%) | -10.4 | 45.05 | -33   | 2      | 13   | -85 | 84  |
| NBMI300mg (n=11) | Visit day 1      | 11 (100%) | 0 (0%) | 55.5                               | 32.06 | 40   | 49     | 91    | 1   | 104 |           |        |       |       |       |        |      |     |     |
|                  | Follow-up day 15 | 11 (100%) | 0 (0%) | 47.2                               | 42.51 | 15   | 31     | 72    | 10  | 155 | 11 (100%) | 0 (0%) | -8.4  | 48.75 | -42   | -10    | 12   | -76 | 102 |
|                  | Follow-up day 45 | 11 (100%) | 0 (0%) | 41.5                               | 35.98 | 19   | 33     | 44    | 14  | 139 | 11 (100%) | 0 (0%) | -14   | 33.43 | -33   | -12    | 14   | -74 | 35  |
| Placebo (n=12)   | Visit day 1      | 12 (100%) | 0 (0%) | 48.8                               | 34.55 | 28.5 | 30     | 72    | 11  | 111 |           |        |       |       |       |        |      |     |     |
|                  | Follow-up day 15 | 12 (100%) | 0 (0%) | 76.2                               | 40.55 | 54   | 59.5   | 98    | 26  | 159 | 12 (100%) | 0 (0%) | 27.3  | 42.16 | 12.5  | 25.5   | 37   | -53 | 131 |
|                  | Follow-up day 45 | 12 (100%) | 0 (0%) | 54.5                               | 41.54 | 18   | 39     | 100.5 | 10  | 122 | 12 (100%) | 0 (0%) | 5.7   | 51.05 | -30.5 | 1      | 52.5 | -70 | 75  |

Executed script: \\SDS-SERVER2\SAS\$\SDS3\Projects\STATISTICS DRUG DEV\NBMI4011 - CTI002\Analyser\Script\SAS\T\_cat001.sas, on: 23MAY2016:14:00, by: maria.lidsell  
Version of source data: nbmi\_neu.sas7bdat, last modified: 24FEB16:23:13, status: Final

Table DE5.55.1 Change from baseline of NMB, Reaction time, Left hand, Average Time (Full analysis set)

| Treatment        | Visit            | Result    |        |      |      |        |        |        |       |       | Change from baseline (Visit day 1) |        |      |      |         |        |        |        |       |
|------------------|------------------|-----------|--------|------|------|--------|--------|--------|-------|-------|------------------------------------|--------|------|------|---------|--------|--------|--------|-------|
|                  |                  | n         | nmiss  | Mean | SD   | Q1     | Median | Q3     | Min   | Max   | n                                  | nmiss  | Mean | SD   | Q1      | Median | Q3     | Min    | Max   |
| Total (n=36)     | Visit day 1      | 36 (100%) | 0 (0%) | 0.2  | 0.03 | 0.226  | 0.242  | 0.2625 | 0.181 | 0.366 |                                    |        |      |      |         |        |        |        |       |
|                  | Follow-up day 15 | 36 (100%) | 0 (0%) | 0.3  | 0.07 | 0.2315 | 0.2495 | 0.279  | 0.02  | 0.514 | 36 (100%)                          | 0 (0%) | 0    | 0.07 | -0.0235 | 0.0065 | 0.0485 | -0.207 | 0.29  |
|                  | Follow-up day 45 | 36 (100%) | 0 (0%) | 0.3  | 0.04 | 0.234  | 0.2575 | 0.2975 | 0.198 | 0.388 | 36 (100%)                          | 0 (0%) | 0    | 0.05 | -0.0135 | 0.0125 | 0.055  | -0.075 | 0.128 |
| NBMI100mg (n=13) | Visit day 1      | 13 (100%) | 0 (0%) | 0.2  | 0.03 | 0.224  | 0.244  | 0.26   | 0.183 | 0.299 |                                    |        |      |      |         |        |        |        |       |
|                  | Follow-up day 15 | 13 (100%) | 0 (0%) | 0.3  | 0.08 | 0.241  | 0.277  | 0.298  | 0.207 | 0.514 | 13 (100%)                          | 0 (0%) | 0    | 0.09 | -0.004  | 0.013  | 0.053  | -0.063 | 0.29  |
|                  | Follow-up day 45 | 13 (100%) | 0 (0%) | 0.3  | 0.04 | 0.238  | 0.266  | 0.281  | 0.215 | 0.388 | 13 (100%)                          | 0 (0%) | 0    | 0.06 | -0.007  | 0.016  | 0.066  | -0.075 | 0.128 |
| NBMI300mg (n=11) | Visit day 1      | 11 (100%) | 0 (0%) | 0.3  | 0.04 | 0.231  | 0.246  | 0.269  | 0.21  | 0.366 |                                    |        |      |      |         |        |        |        |       |
|                  | Follow-up day 15 | 11 (100%) | 0 (0%) | 0.3  | 0.03 | 0.239  | 0.265  | 0.273  | 0.197 | 0.3   | 11 (100%)                          | 0 (0%) | 0    | 0.05 | -0.025  | 0.015  | 0.048  | -0.085 | 0.061 |
|                  | Follow-up day 45 | 11 (100%) | 0 (0%) | 0.3  | 0.05 | 0.23   | 0.238  | 0.305  | 0.217 | 0.331 | 11 (100%)                          | 0 (0%) | 0    | 0.05 | -0.029  | 0.01   | 0.049  | -0.047 | 0.098 |
| Placebo (n=12)   | Visit day 1      | 12 (100%) | 0 (0%) | 0.2  | 0.03 | 0.219  | 0.236  | 0.2585 | 0.181 | 0.284 |                                    |        |      |      |         |        |        |        |       |
|                  | Follow-up day 15 | 12 (100%) | 0 (0%) | 0.2  | 0.07 | 0.227  | 0.2325 | 0.2385 | 0.02  | 0.334 | 12 (100%)                          | 0 (0%) | 0    | 0.07 | -0.0235 | -0.007 | 0.018  | -0.207 | 0.054 |
|                  | Follow-up day 45 | 12 (100%) | 0 (0%) | 0.3  | 0.05 | 0.23   | 0.2455 | 0.2875 | 0.198 | 0.36  | 12 (100%)                          | 0 (0%) | 0    | 0.05 | -0.0075 | 0.0125 | 0.0565 | -0.043 | 0.123 |

Executed script: \\SDS-SERVER2\SAS\$\SDS3\Projects\STATISTICS DRUG DEV\NBMI4011 - CTI002\Analyser\Script\SAS\T\_cat001.sas, on: 23MAY2016:14:00, by: maria.lidsell  
Version of source data: nbmi\_neu.sas7bdat, last modified: 24FEB16:23:13, status: Final

Table DE5.56.1 Change from baseline of NMB, Reaction time, Left hand, Standard Deviation (Full analysis set)

| Treatment        | Visit            | Result    |        | Change from baseline (Visit day 1) |      |        |        |        |       |       |           |        |      |      |         |        |        |        |       |
|------------------|------------------|-----------|--------|------------------------------------|------|--------|--------|--------|-------|-------|-----------|--------|------|------|---------|--------|--------|--------|-------|
|                  |                  | n         | nmiss  | Mean                               | SD   | Q1     | Median | Q3     | Min   | Max   | n         | nmiss  | Mean | SD   | Q1      | Median | Q3     | Min    | Max   |
| Total (n=36)     | Visit day 1      | 36 (100%) | 0 (0%) | 0                                  | 0.02 | 0.026  | 0.0335 | 0.048  | 0.016 | 0.103 |           |        |      |      |         |        |        |        |       |
|                  | Follow-up day 15 | 36 (100%) | 0 (0%) | 0.1                                | 0.07 | 0.0315 | 0.043  | 0.0525 | 0.018 | 0.43  | 36 (100%) | 0 (0%) | 0    | 0.07 | -0.002  | 0.007  | 0.0215 | -0.054 | 0.387 |
|                  | Follow-up day 45 | 36 (100%) | 0 (0%) | 0.1                                | 0.04 | 0.0345 | 0.045  | 0.0685 | 0.014 | 0.199 | 36 (100%) | 0 (0%) | 0    | 0.05 | -0.0065 | 0.011  | 0.0285 | -0.053 | 0.173 |
| NBMI100mg (n=13) | Visit day 1      | 13 (100%) | 0 (0%) | 0                                  | 0.02 | 0.026  | 0.03   | 0.041  | 0.022 | 0.079 |           |        |      |      |         |        |        |        |       |
|                  | Follow-up day 15 | 13 (100%) | 0 (0%) | 0.1                                | 0.11 | 0.045  | 0.051  | 0.067  | 0.018 | 0.43  | 13 (100%) | 0 (0%) | 0    | 0.11 | -0.001  | 0.025  | 0.029  | -0.033 | 0.387 |
|                  | Follow-up day 45 | 13 (100%) | 0 (0%) | 0.1                                | 0.05 | 0.031  | 0.04   | 0.065  | 0.014 | 0.199 | 13 (100%) | 0 (0%) | 0    | 0.06 | -0.016  | 0.009  | 0.028  | -0.048 | 0.173 |
| NBMI300mg (n=11) | Visit day 1      | 11 (100%) | 0 (0%) | 0                                  | 0.03 | 0.023  | 0.032  | 0.05   | 0.02  | 0.103 |           |        |      |      |         |        |        |        |       |
|                  | Follow-up day 15 | 11 (100%) | 0 (0%) | 0                                  | 0.04 | 0.027  | 0.037  | 0.05   | 0.018 | 0.137 | 11 (100%) | 0 (0%) | 0    | 0.04 | -0.002  | 0.005  | 0.013  | -0.054 | 0.113 |
|                  | Follow-up day 45 | 11 (100%) | 0 (0%) | 0                                  | 0.02 | 0.036  | 0.045  | 0.072  | 0.022 | 0.082 | 11 (100%) | 0 (0%) | 0    | 0.03 | -0.004  | 0.013  | 0.024  | -0.053 | 0.058 |
| Placebo (n=12)   | Visit day 1      | 12 (100%) | 0 (0%) | 0                                  | 0.02 | 0.0305 | 0.0355 | 0.05   | 0.016 | 0.073 |           |        |      |      |         |        |        |        |       |
|                  | Follow-up day 15 | 12 (100%) | 0 (0%) | 0                                  | 0.02 | 0.031  | 0.036  | 0.047  | 0.027 | 0.094 | 12 (100%) | 0 (0%) | 0    | 0.01 | -0.0065 | 0.001  | 0.0115 | -0.02  | 0.021 |
|                  | Follow-up day 45 | 12 (100%) | 0 (0%) | 0.1                                | 0.04 | 0.033  | 0.0495 | 0.0755 | 0.024 | 0.177 | 12 (100%) | 0 (0%) | 0    | 0.04 | -0.005  | 0.0095 | 0.033  | -0.018 | 0.143 |

Executed script: \\SDS-SERVER2\SAS\$\SDS3\Projects\STATISTICS DRUG DEV\NBMI4011 - CTI002\Analyser\Script\SAS\T\_cat001.sas, on: 23MAY2016:14:00, by: maria.lidsell  
Version of source data: nbmi\_neu.sas7bdat, last modified: 24FEB16:23:13, status: Final

Table DE5.57.1 Change from baseline of NMB, Reaction time, Left hand, RT Index (Full analysis set)

| Treatment        | Visit            | Result    |        |      |       |      |        |      |     |     | Change from baseline (Visit day 1) |        |       |       |       |        |     |      |     |
|------------------|------------------|-----------|--------|------|-------|------|--------|------|-----|-----|------------------------------------|--------|-------|-------|-------|--------|-----|------|-----|
|                  |                  | n         | nmiss  | Mean | SD    | Q1   | Median | Q3   | Min | Max | n                                  | nmiss  | Mean  | SD    | Q1    | Median | Q3  | Min  | Max |
| Total (n=36)     | Visit day 1      | 36 (100%) | 0 (0%) | 52.6 | 38.63 | 24.5 | 43.5   | 68.5 | 1   | 158 |                                    |        |       |       |       |        |     |      |     |
|                  | Follow-up day 15 | 36 (100%) | 0 (0%) | 43.4 | 35.4  | 15.5 | 35     | 58   | 0   | 145 | 36 (100%)                          | 0 (0%) | -9.2  | 49.53 | -34   | -4     | 18  | -147 | 113 |
|                  | Follow-up day 45 | 36 (100%) | 0 (0%) | 36.5 | 31.59 | 9.5  | 28.5   | 54.5 | 1   | 131 | 36 (100%)                          | 0 (0%) | -16.1 | 47.39 | -40   | -14.5  | 6.5 | -140 | 86  |
| NBMI100mg (n=13) | Visit day 1      | 13 (100%) | 0 (0%) | 51.8 | 39.71 | 27   | 42     | 71   | 9   | 155 |                                    |        |       |       |       |        |     |      |     |
|                  | Follow-up day 15 | 13 (100%) | 0 (0%) | 32.8 | 34.07 | 9    | 16     | 45   | 0   | 112 | 13 (100%)                          | 0 (0%) | -18.9 | 58.57 | -45   | -10    | 8   | -147 | 85  |
|                  | Follow-up day 45 | 13 (100%) | 0 (0%) | 30.1 | 25.22 | 15   | 22     | 48   | 1   | 92  | 13 (100%)                          | 0 (0%) | -21.7 | 51.43 | -33   | -14    | 6   | -140 | 81  |
| NBMI300mg (n=11) | Visit day 1      | 11 (100%) | 0 (0%) | 42.5 | 29.73 | 21   | 39     | 59   | 1   | 107 |                                    |        |       |       |       |        |     |      |     |
|                  | Follow-up day 15 | 11 (100%) | 0 (0%) | 38.7 | 36.17 | 18   | 23     | 47   | 9   | 134 | 11 (100%)                          | 0 (0%) | -3.7  | 52.07 | -33   | -12    | 23  | -88  | 113 |
|                  | Follow-up day 45 | 11 (100%) | 0 (0%) | 37.8 | 31.62 | 8    | 49     | 61   | 4   | 87  | 11 (100%)                          | 0 (0%) | -4.6  | 35.93 | -34   | -5     | 25  | -55  | 54  |
| Placebo (n=12)   | Visit day 1      | 12 (100%) | 0 (0%) | 62.8 | 44.82 | 27   | 51     | 85   | 14  | 158 |                                    |        |       |       |       |        |     |      |     |
|                  | Follow-up day 15 | 12 (100%) | 0 (0%) | 59.2 | 33.29 | 47.5 | 56.5   | 66   | 3   | 145 | 12 (100%)                          | 0 (0%) | -3.6  | 37.7  | -12   | 10.5   | 18  | -97  | 33  |
|                  | Follow-up day 45 | 12 (100%) | 0 (0%) | 42.3 | 38.52 | 13   | 39.5   | 62   | 2   | 131 | 12 (100%)                          | 0 (0%) | -20.4 | 53.82 | -55.5 | -18.5  | 6   | -118 | 86  |

Executed script: \\SDS-SERVER2\SAS\$\SDS3\Projects\STATISTICS DRUG DEV\NBMI4011 - CTI002\Analyser\Script\SAS\T\_cat001.sas, on: 23MAY2016:14:00, by: maria.lidsell  
Version of source data: nbmi\_neu.sas7bdat, last modified: 24FEB16:23:13, status: Final

Table DE6.1.1 Change from usual of Total Fatigue Score Sum (Full analysis set)

| Treatment        | Visit            | Result    |        |      |      |      |        |      |     |           | Change from usual* |        |      |      |      |        |      |     |     |
|------------------|------------------|-----------|--------|------|------|------|--------|------|-----|-----------|--------------------|--------|------|------|------|--------|------|-----|-----|
|                  |                  | n         | nmiss  | Mean | SD   | Q1   | Median | Q3   | Min | Max       | n                  | nmiss  | Mean | SD   | Q1   | Median | Q3   | Min | Max |
| Total (n=36)     | Visit day 2      | 36 (100%) | 0 (0%) | 13   | 0.17 | 13   | 13     | 13   | 12  | 13        | 36 (100%)          | 0 (0%) | 0    | 0.17 | 0    | 0      | 0    | -1  | 0   |
|                  | Visit day 3      | 36 (100%) | 0 (0%) | 11.3 | 3.05 | 10.5 | 13     | 13   | 3   | 15        | 36 (100%)          | 0 (0%) | -1.7 | 3.05 | -2.5 | 0      | 0    | -10 | 2   |
|                  | Visit day 4      | 36 (100%) | 0 (0%) | 11.3 | 2.73 | 10   | 13     | 13   | 3   | 14        | 36 (100%)          | 0 (0%) | -1.7 | 2.73 | -3   | 0      | 0    | -10 | 1   |
|                  | Visit day 5      | 36 (100%) | 0 (0%) | 10.9 | 2.94 | 9    | 12     | 13   | 0   | 13        | 36 (100%)          | 0 (0%) | -2.1 | 2.94 | -4   | -1     | 0    | -13 | 0   |
|                  | Visit day 6      | 36 (100%) | 0 (0%) | 10.4 | 3.67 | 9    | 12     | 13   | 0   | 14        | 36 (100%)          | 0 (0%) | -2.6 | 3.67 | -4   | -1     | 0    | -13 | 1   |
|                  | Visit day 7      | 36 (100%) | 0 (0%) | 9.8  | 3.91 | 7    | 12     | 13   | 0   | 15        | 36 (100%)          | 0 (0%) | -3.2 | 3.91 | -6   | -1     | 0    | -13 | 2   |
|                  | Visit day 8      | 36 (100%) | 0 (0%) | 9.1  | 3.91 | 6    | 10     | 13   | 0   | 13        | 36 (100%)          | 0 (0%) | -3.9 | 3.91 | -7   | -3     | 0    | -13 | 0   |
|                  | Visit day 9      | 36 (100%) | 0 (0%) | 10   | 3.48 | 7    | 11     | 13   | 3   | 16        | 36 (100%)          | 0 (0%) | -3   | 3.48 | -6   | -2     | 0    | -10 | 3   |
|                  | Visit day 10     | 36 (100%) | 0 (0%) | 9.9  | 3.62 | 9    | 11     | 13   | 0   | 14        | 36 (100%)          | 0 (0%) | -3.1 | 3.62 | -4   | -2     | 0    | -13 | 1   |
|                  | Visit day 11     | 36 (100%) | 0 (0%) | 9.7  | 3.11 | 7.5  | 11     | 12.5 | 0   | 13        | 36 (100%)          | 0 (0%) | -3.3 | 3.11 | -5.5 | -2     | -0.5 | -13 | 0   |
|                  | Visit day 12     | 36 (100%) | 0 (0%) | 9.8  | 3.38 | 8    | 10     | 13   | 0   | 13        | 36 (100%)          | 0 (0%) | -3.2 | 3.38 | -5   | -3     | 0    | -13 | 0   |
|                  | Visit day 13     | 36 (100%) | 0 (0%) | 8.3  | 4.63 | 4    | 9.5    | 13   | 0   | 14        | 36 (100%)          | 0 (0%) | -4.7 | 4.63 | -9   | -3.5   | 0    | -13 | 1   |
|                  | Follow-up day 15 | 36 (100%) | 0 (0%) | 7.8  | 4.64 | 4.5  | 9.5    | 11.5 | 0   | 13        | 36 (100%)          | 0 (0%) | -5.3 | 4.64 | -8.5 | -3.5   | -1.5 | -13 | 0   |
| Follow-up day 45 | 36 (100%)        | 0 (0%)    | 7.7    | 4.62 | 5    | 8    | 12     | 0    | 14  | 36 (100%) | 0 (0%)             | -5.3   | 4.62 | -8   | -5   | -1     | -13  | 1   |     |
| NBMI100mg (n=13) | Visit day 2      | 13 (100%) | 0 (0%) | 13   | 0    | 13   | 13     | 13   | 13  | 13        | 13 (100%)          | 0 (0%) | 0    | 0    | 0    | 0      | 0    | 0   | 0   |
|                  | Visit day 3      | 13 (100%) | 0 (0%) | 10.6 | 3.57 | 8    | 13     | 13   | 4   | 13        | 13 (100%)          | 0 (0%) | -2.4 | 3.57 | -5   | 0      | 0    | -9  | 0   |
|                  | Visit day 4      | 13 (100%) | 0 (0%) | 11.5 | 1.76 | 10   | 13     | 13   | 9   | 13        | 13 (100%)          | 0 (0%) | -1.5 | 1.76 | -3   | 0      | 0    | -4  | 0   |
|                  | Visit day 5      | 13 (100%) | 0 (0%) | 10.3 | 3.61 | 9    | 10     | 13   | 0   | 13        | 13 (100%)          | 0 (0%) | -2.7 | 3.61 | -4   | -3     | 0    | -13 | 0   |
|                  | Visit day 6      | 13 (100%) | 0 (0%) | 9.5  | 4.37 | 7    | 11     | 13   | 0   | 13        | 13 (100%)          | 0 (0%) | -3.5 | 4.37 | -6   | -2     | 0    | -13 | 0   |
|                  | Visit day 7      | 13 (100%) | 0 (0%) | 10.2 | 3.95 | 9    | 12     | 13   | 0   | 13        | 13 (100%)          | 0 (0%) | -2.8 | 3.95 | -4   | -1     | 0    | -13 | 0   |
|                  | Visit day 8      | 13 (100%) | 0 (0%) | 9.1  | 4.37 | 6    | 11     | 13   | 2   | 13        | 13 (100%)          | 0 (0%) | -3.9 | 4.37 | -7   | -2     | 0    | -11 | 0   |
|                  | Visit day 9      | 13 (100%) | 0 (0%) | 10.5 | 3.64 | 9    | 11     | 13   | 3   | 15        | 13 (100%)          | 0 (0%) | -2.5 | 3.64 | -4   | -2     | 0    | -10 | 2   |
|                  | Visit day 10     | 13 (100%) | 0 (0%) | 9.7  | 4.48 | 9    | 11     | 13   | 0   | 14        | 13 (100%)          | 0 (0%) | -3.3 | 4.48 | -4   | -2     | 0    | -13 | 1   |
|                  | Visit day 11     | 13 (100%) | 0 (0%) | 10.2 | 2.24 | 8    | 11     | 12   | 7   | 13        | 13 (100%)          | 0 (0%) | -2.8 | 2.24 | -5   | -2     | -1   | -6  | 0   |
|                  | Visit day 12     | 13 (100%) | 0 (0%) | 10.4 | 2.02 | 9    | 10     | 13   | 8   | 13        | 13 (100%)          | 0 (0%) | -2.6 | 2.02 | -4   | -3     | 0    | -5  | 0   |



| Treatment        | Visit            | Result    |        |      |      |      |        |    |     |           | Change from usual* |        |      |      |      |        |     |     |     |
|------------------|------------------|-----------|--------|------|------|------|--------|----|-----|-----------|--------------------|--------|------|------|------|--------|-----|-----|-----|
|                  |                  | n         | nmiss  | Mean | SD   | Q1   | Median | Q3 | Min | Max       | n                  | nmiss  | Mean | SD   | Q1   | Median | Q3  | Min | Max |
| NBMI300mg (n=11) | Visit day 13     | 13 (100%) | 0 (0%) | 8.8  | 4.67 | 8    | 9      | 13 | 0   | 14        | 13 (100%)          | 0 (0%) | -4.2 | 4.67 | -5   | -4     | 0   | -13 | 1   |
|                  | Follow-up day 15 | 13 (100%) | 0 (0%) | 7.2  | 4.95 | 4    | 8      | 11 | 0   | 13        | 13 (100%)          | 0 (0%) | -5.8 | 4.95 | -9   | -5     | -2  | -13 | 0   |
|                  | Follow-up day 45 | 13 (100%) | 0 (0%) | 8    | 5    | 4    | 8      | 12 | 0   | 14        | 13 (100%)          | 0 (0%) | -5   | 5    | -9   | -5     | -1  | -13 | 1   |
|                  | Visit day 2      | 11 (100%) | 0 (0%) | 12.9 | 0.3  | 13   | 13     | 13 | 12  | 13        | 11 (100%)          | 0 (0%) | -0.1 | 0.3  | 0    | 0      | 0   | -1  | 0   |
|                  | Visit day 3      | 11 (100%) | 0 (0%) | 11.6 | 1.96 | 10   | 13     | 13 | 7   | 13        | 11 (100%)          | 0 (0%) | -1.4 | 1.96 | -3   | 0      | 0   | -6  | 0   |
|                  | Visit day 4      | 11 (100%) | 0 (0%) | 10.7 | 3.93 | 10   | 13     | 13 | 3   | 13        | 11 (100%)          | 0 (0%) | -2.3 | 3.93 | -3   | 0      | 0   | -10 | 0   |
|                  | Visit day 5      | 11 (100%) | 0 (0%) | 11.4 | 1.69 | 10   | 12     | 13 | 8   | 13        | 11 (100%)          | 0 (0%) | -1.6 | 1.69 | -3   | -1     | 0   | -5  | 0   |
|                  | Visit day 6      | 11 (100%) | 0 (0%) | 10.8 | 3.63 | 9    | 12     | 13 | 1   | 14        | 11 (100%)          | 0 (0%) | -2.2 | 3.63 | -4   | -1     | 0   | -12 | 1   |
|                  | Visit day 7      | 11 (100%) | 0 (0%) | 9.2  | 3.92 | 7    | 11     | 12 | 0   | 13        | 11 (100%)          | 0 (0%) | -3.8 | 3.92 | -6   | -2     | -1  | -13 | 0   |
|                  | Visit day 8      | 11 (100%) | 0 (0%) | 9.1  | 3.3  | 6    | 10     | 12 | 3   | 13        | 11 (100%)          | 0 (0%) | -3.9 | 3.3  | -7   | -3     | -1  | -10 | 0   |
|                  | Visit day 9      | 11 (100%) | 0 (0%) | 9.5  | 4.01 | 6    | 11     | 12 | 3   | 16        | 11 (100%)          | 0 (0%) | -3.5 | 4.01 | -7   | -2     | -1  | -10 | 3   |
|                  | Visit day 10     | 11 (100%) | 0 (0%) | 9.5  | 2.84 | 7    | 9      | 12 | 5   | 13        | 11 (100%)          | 0 (0%) | -3.5 | 2.84 | -6   | -4     | -1  | -8  | 0   |
|                  | Visit day 11     | 11 (100%) | 0 (0%) | 8.2  | 3.82 | 6    | 9      | 11 | 0   | 12        | 11 (100%)          | 0 (0%) | -4.8 | 3.82 | -7   | -4     | -2  | -13 | -1  |
|                  | Visit day 12     | 11 (100%) | 0 (0%) | 9    | 4.4  | 7    | 11     | 12 | 0   | 13        | 11 (100%)          | 0 (0%) | -4   | 4.4  | -6   | -2     | -1  | -13 | 0   |
|                  | Visit day 13     | 11 (100%) | 0 (0%) | 6.5  | 4.76 | 2    | 8      | 11 | 0   | 12        | 11 (100%)          | 0 (0%) | -6.5 | 4.76 | -11  | -5     | -2  | -13 | -1  |
| Follow-up day 15 | 11 (100%)        | 0 (0%)    | 6.3    | 4.63 | 2    | 7    | 10     | 0  | 12  | 11 (100%) | 0 (0%)             | -6.7   | 4.63 | -11  | -6   | -3     | -13 | -1  |     |
| Follow-up day 45 | 11 (100%)        | 0 (0%)    | 5.8    | 4.6  | 0    | 7    | 9      | 0  | 13  | 11 (100%) | 0 (0%)             | -7.2   | 4.6  | -13  | -6   | -4     | -13 | 0   |     |
| Placebo (n=12)   | Visit day 2      | 12 (100%) | 0 (0%) | 13   | 0    | 13   | 13     | 13 | 13  | 13        | 12 (100%)          | 0 (0%) | 0    | 0    | 0    | 0      | 0   | 0   | 0   |
|                  | Visit day 3      | 12 (100%) | 0 (0%) | 11.8 | 3.35 | 13   | 13     | 13 | 3   | 15        | 12 (100%)          | 0 (0%) | -1.2 | 3.35 | 0    | 0      | 0   | -10 | 2   |
|                  | Visit day 4      | 12 (100%) | 0 (0%) | 11.5 | 2.43 | 10.5 | 13     | 13 | 6   | 14        | 12 (100%)          | 0 (0%) | -1.5 | 2.43 | -2.5 | 0      | 0   | -7  | 1   |
|                  | Visit day 5      | 12 (100%) | 0 (0%) | 11.1 | 3.18 | 9.5  | 13     | 13 | 4   | 13        | 12 (100%)          | 0 (0%) | -1.9 | 3.18 | -3.5 | 0      | 0   | -9  | 0   |
|                  | Visit day 6      | 12 (100%) | 0 (0%) | 11   | 2.92 | 9.5  | 13     | 13 | 5   | 13        | 12 (100%)          | 0 (0%) | -2   | 2.92 | -3.5 | 0      | 0   | -8  | 0   |
|                  | Visit day 7      | 12 (100%) | 0 (0%) | 10   | 4.13 | 6.5  | 12.5   | 13 | 2   | 15        | 12 (100%)          | 0 (0%) | -3   | 4.13 | -6.5 | -0.5   | 0   | -11 | 2   |
|                  | Visit day 8      | 12 (100%) | 0 (0%) | 9.3  | 4.22 | 6    | 10     | 13 | 0   | 13        | 12 (100%)          | 0 (0%) | -3.8 | 4.22 | -7   | -3     | 0   | -13 | 0   |
|                  | Visit day 9      | 12 (100%) | 0 (0%) | 10.1 | 3    | 8.5  | 10.5   | 13 | 4   | 13        | 12 (100%)          | 0 (0%) | -2.9 | 3    | -4.5 | -2.5   | 0   | -9  | 0   |
|                  | Visit day 10     | 12 (100%) | 0 (0%) | 10.3 | 3.47 | 9    | 11     | 13 | 1   | 13        | 12 (100%)          | 0 (0%) | -2.7 | 3.47 | -4   | -2     | 0   | -12 | 0   |
|                  | Visit day 11     | 12 (100%) | 0 (0%) | 10.6 | 2.94 | 8    | 12.5   | 13 | 6   | 13        | 12 (100%)          | 0 (0%) | -2.4 | 2.94 | -5   | -0.5   | 0   | -7  | 0   |

| Treatment | Visit            | Result    |        |      |      |     |        |      |     |     | Change from usual* |        |      |      |      |        |      |     |     |
|-----------|------------------|-----------|--------|------|------|-----|--------|------|-----|-----|--------------------|--------|------|------|------|--------|------|-----|-----|
|           |                  | n         | nmiss  | Mean | SD   | Q1  | Median | Q3   | Min | Max | n                  | nmiss  | Mean | SD   | Q1   | Median | Q3   | Min | Max |
|           | Visit day 12     | 12 (100%) | 0 (0%) | 10   | 3.62 | 6.5 | 11.5   | 13   | 3   | 13  | 12 (100%)          | 0 (0%) | -3   | 3.62 | -6.5 | -1.5   | 0    | -10 | 0   |
|           | Visit day 13     | 12 (100%) | 0 (0%) | 9.3  | 4.41 | 6.5 | 10.5   | 13   | 0   | 13  | 12 (100%)          | 0 (0%) | -3.8 | 4.41 | -6.5 | -2.5   | 0    | -13 | 0   |
|           | Follow-up day 15 | 12 (100%) | 0 (0%) | 9.7  | 3.98 | 7   | 11     | 13   | 0   | 13  | 12 (100%)          | 0 (0%) | -3.3 | 3.98 | -6   | -2     | 0    | -13 | 0   |
|           | Follow-up day 45 | 12 (100%) | 0 (0%) | 9.1  | 3.94 | 6.5 | 9.5    | 12.5 | 0   | 13  | 12 (100%)          | 0 (0%) | -3.9 | 3.94 | -6.5 | -3.5   | -0.5 | -13 | 0   |

Executed script: \\SDS-SERVER2\SAS\$\SDS3\Projects\STATISTICS DRUG DEV\NBMI4011 - CTI002\Analyser\Script\SAS\T\_fs002.sas, on: 23MAY2016:14:00, by: maria.lidsell

Version of source data: nbmi\_ph3.sas7bdat, last modified: 24FEB16:23:13, status: Final

\*) Change for physical and mental fatigue score is defined as difference from 1=same as usual.

Table DE6.2.1 Change from usual of Physical Fatigue Score, Total (Full analysis set)

| Treatment        | Visit            | Result    |        |      |      |     |        |     |     |           |           | Change from usual* |      |      |      |        |      |     |     |
|------------------|------------------|-----------|--------|------|------|-----|--------|-----|-----|-----------|-----------|--------------------|------|------|------|--------|------|-----|-----|
|                  |                  | n         | nmiss  | Mean | SD   | Q1  | Median | Q3  | Min | Max       | n         | nmiss              | Mean | SD   | Q1   | Median | Q3   | Min | Max |
| Total (n=36)     | Visit day 2      | 36 (100%) | 0 (0%) | 8    | 0.17 | 8   | 8      | 8   | 7   | 8         | 36 (100%) | 0 (0%)             | 0    | 0.17 | 0    | 0      | 0    | -1  | 0   |
|                  | Visit day 3      | 36 (100%) | 0 (0%) | 6.8  | 2.24 | 5.5 | 8      | 8   | 0   | 10        | 36 (100%) | 0 (0%)             | -1.2 | 2.24 | -2.5 | 0      | 0    | -8  | 2   |
|                  | Visit day 4      | 36 (100%) | 0 (0%) | 6.7  | 2.07 | 6   | 8      | 8   | 0   | 9         | 36 (100%) | 0 (0%)             | -1.3 | 2.07 | -2   | 0      | 0    | -8  | 1   |
|                  | Visit day 5      | 36 (100%) | 0 (0%) | 6.4  | 2.09 | 5   | 7.5    | 8   | 0   | 8         | 36 (100%) | 0 (0%)             | -1.6 | 2.09 | -3   | -0.5   | 0    | -8  | 0   |
|                  | Visit day 6      | 36 (100%) | 0 (0%) | 6.1  | 2.33 | 5   | 7      | 8   | 0   | 8         | 36 (100%) | 0 (0%)             | -1.9 | 2.33 | -3   | -1     | 0    | -8  | 0   |
|                  | Visit day 7      | 36 (100%) | 0 (0%) | 5.8  | 2.62 | 4   | 7      | 8   | 0   | 10        | 36 (100%) | 0 (0%)             | -2.3 | 2.62 | -4   | -1     | 0    | -8  | 2   |
|                  | Visit day 8      | 36 (100%) | 0 (0%) | 5.3  | 2.47 | 3   | 5      | 8   | 0   | 8         | 36 (100%) | 0 (0%)             | -2.7 | 2.47 | -5   | -3     | 0    | -8  | 0   |
|                  | Visit day 9      | 36 (100%) | 0 (0%) | 5.9  | 2.41 | 4   | 6      | 8   | 1   | 11        | 36 (100%) | 0 (0%)             | -2.1 | 2.41 | -4   | -2     | 0    | -7  | 3   |
|                  | Visit day 10     | 36 (100%) | 0 (0%) | 5.6  | 2.52 | 4   | 6      | 8   | 0   | 9         | 36 (100%) | 0 (0%)             | -2.4 | 2.52 | -4   | -2     | 0    | -8  | 1   |
|                  | Visit day 11     | 36 (100%) | 0 (0%) | 5.4  | 2.34 | 4   | 6      | 8   | 0   | 8         | 36 (100%) | 0 (0%)             | -2.6 | 2.34 | -4   | -2     | 0    | -8  | 0   |
|                  | Visit day 12     | 36 (100%) | 0 (0%) | 5.8  | 2.21 | 5   | 6      | 8   | 0   | 8         | 36 (100%) | 0 (0%)             | -2.2 | 2.21 | -3   | -2     | 0    | -8  | 0   |
|                  | Visit day 13     | 36 (100%) | 0 (0%) | 4.6  | 3    | 1.5 | 5      | 8   | 0   | 9         | 36 (100%) | 0 (0%)             | -3.4 | 3    | -6.5 | -3     | 0    | -8  | 1   |
|                  | Follow-up day 15 | 36 (100%) | 0 (0%) | 4.4  | 2.8  | 2.5 | 5      | 6.5 | 0   | 8         | 36 (100%) | 0 (0%)             | -3.6 | 2.8  | -5.5 | -3     | -1.5 | -8  | 0   |
| Follow-up day 45 | 36 (100%)        | 0 (0%)    | 4.4    | 2.98 | 2.5  | 4   | 7      | 0   | 9   | 36 (100%) | 0 (0%)    | -3.6               | 2.98 | -5.5 | -4   | -1     | -8   | 1   |     |
| NBMI100mg (n=13) | Visit day 2      | 13 (100%) | 0 (0%) | 8    | 0    | 8   | 8      | 8   | 8   | 8         | 13 (100%) | 0 (0%)             | 0    | 0    | 0    | 0      | 0    | 0   | 0   |
|                  | Visit day 3      | 13 (100%) | 0 (0%) | 6.4  | 2.47 | 5   | 8      | 8   | 1   | 8         | 13 (100%) | 0 (0%)             | -1.6 | 2.47 | -3   | 0      | 0    | -7  | 0   |
|                  | Visit day 4      | 13 (100%) | 0 (0%) | 6.8  | 1.48 | 6   | 8      | 8   | 4   | 8         | 13 (100%) | 0 (0%)             | -1.2 | 1.48 | -2   | 0      | 0    | -4  | 0   |
|                  | Visit day 5      | 13 (100%) | 0 (0%) | 6.2  | 2.38 | 5   | 7      | 8   | 0   | 8         | 13 (100%) | 0 (0%)             | -1.8 | 2.38 | -3   | -1     | 0    | -8  | 0   |
|                  | Visit day 6      | 13 (100%) | 0 (0%) | 5.8  | 2.59 | 5   | 7      | 8   | 0   | 8         | 13 (100%) | 0 (0%)             | -2.2 | 2.59 | -3   | -1     | 0    | -8  | 0   |
|                  | Visit day 7      | 13 (100%) | 0 (0%) | 5.9  | 2.6  | 5   | 7      | 8   | 0   | 8         | 13 (100%) | 0 (0%)             | -2.1 | 2.6  | -3   | -1     | 0    | -8  | 0   |
|                  | Visit day 8      | 13 (100%) | 0 (0%) | 5.3  | 2.69 | 2   | 6      | 8   | 1   | 8         | 13 (100%) | 0 (0%)             | -2.7 | 2.69 | -6   | -2     | 0    | -7  | 0   |
|                  | Visit day 9      | 13 (100%) | 0 (0%) | 6.2  | 2.35 | 5   | 6      | 8   | 2   | 10        | 13 (100%) | 0 (0%)             | -1.8 | 2.35 | -3   | -2     | 0    | -6  | 2   |
|                  | Visit day 10     | 13 (100%) | 0 (0%) | 5.5  | 2.93 | 4   | 6      | 8   | 0   | 9         | 13 (100%) | 0 (0%)             | -2.5 | 2.93 | -4   | -2     | 0    | -8  | 1   |
|                  | Visit day 11     | 13 (100%) | 0 (0%) | 5.8  | 1.86 | 5   | 6      | 8   | 2   | 8         | 13 (100%) | 0 (0%)             | -2.2 | 1.86 | -3   | -2     | 0    | -6  | 0   |
|                  | Visit day 12     | 13 (100%) | 0 (0%) | 6.1  | 1.5  | 5   | 5      | 8   | 4   | 8         | 13 (100%) | 0 (0%)             | -1.9 | 1.5  | -3   | -3     | 0    | -4  | 0   |

| Treatment        | Visit            | Result    |        |      |      |     |        |    |     |           | Change from usual* |        |      |      |      |        |    |     |     |
|------------------|------------------|-----------|--------|------|------|-----|--------|----|-----|-----------|--------------------|--------|------|------|------|--------|----|-----|-----|
|                  |                  | n         | nmiss  | Mean | SD   | Q1  | Median | Q3 | Min | Max       | n                  | nmiss  | Mean | SD   | Q1   | Median | Q3 | Min | Max |
| NBMI300mg (n=11) | Visit day 13     | 13 (100%) | 0 (0%) | 5.1  | 2.96 | 4   | 5      | 8  | 0   | 9         | 13 (100%)          | 0 (0%) | -2.9 | 2.96 | -4   | -3     | 0  | -8  | 1   |
|                  | Follow-up day 15 | 13 (100%) | 0 (0%) | 4.2  | 3    | 2   | 4      | 6  | 0   | 8         | 13 (100%)          | 0 (0%) | -3.8 | 3    | -6   | -4     | -2 | -8  | 0   |
|                  | Follow-up day 45 | 13 (100%) | 0 (0%) | 4.3  | 3.33 | 2   | 4      | 7  | 0   | 9         | 13 (100%)          | 0 (0%) | -3.7 | 3.33 | -6   | -4     | -1 | -8  | 1   |
|                  | Visit day 2      | 11 (100%) | 0 (0%) | 7.9  | 0.3  | 8   | 8      | 8  | 7   | 8         | 11 (100%)          | 0 (0%) | -0.1 | 0.3  | 0    | 0      | 0  | -1  | 0   |
|                  | Visit day 3      | 11 (100%) | 0 (0%) | 6.8  | 1.54 | 5   | 8      | 8  | 4   | 8         | 11 (100%)          | 0 (0%) | -1.2 | 1.54 | -3   | 0      | 0  | -4  | 0   |
|                  | Visit day 4      | 11 (100%) | 0 (0%) | 6.2  | 2.96 | 5   | 8      | 8  | 0   | 8         | 11 (100%)          | 0 (0%) | -1.8 | 2.96 | -3   | 0      | 0  | -8  | 0   |
|                  | Visit day 5      | 11 (100%) | 0 (0%) | 6.5  | 1.57 | 5   | 7      | 8  | 4   | 8         | 11 (100%)          | 0 (0%) | -1.5 | 1.57 | -3   | -1     | 0  | -4  | 0   |
|                  | Visit day 6      | 11 (100%) | 0 (0%) | 6.2  | 2.44 | 5   | 7      | 8  | 0   | 8         | 11 (100%)          | 0 (0%) | -1.8 | 2.44 | -3   | -1     | 0  | -8  | 0   |
|                  | Visit day 7      | 11 (100%) | 0 (0%) | 5.2  | 2.64 | 3   | 6      | 7  | 0   | 8         | 11 (100%)          | 0 (0%) | -2.8 | 2.64 | -5   | -2     | -1 | -8  | 0   |
|                  | Visit day 8      | 11 (100%) | 0 (0%) | 5.2  | 2.27 | 3   | 5      | 7  | 2   | 8         | 11 (100%)          | 0 (0%) | -2.8 | 2.27 | -5   | -3     | -1 | -6  | 0   |
|                  | Visit day 9      | 11 (100%) | 0 (0%) | 5.5  | 2.94 | 3   | 7      | 7  | 1   | 11        | 11 (100%)          | 0 (0%) | -2.5 | 2.94 | -5   | -1     | -1 | -7  | 3   |
|                  | Visit day 10     | 11 (100%) | 0 (0%) | 5.1  | 2.26 | 3   | 5      | 7  | 2   | 8         | 11 (100%)          | 0 (0%) | -2.9 | 2.26 | -5   | -3     | -1 | -6  | 0   |
|                  | Visit day 11     | 11 (100%) | 0 (0%) | 4.2  | 2.6  | 2   | 5      | 7  | 0   | 7         | 11 (100%)          | 0 (0%) | -3.8 | 2.6  | -6   | -3     | -1 | -8  | -1  |
|                  | Visit day 12     | 11 (100%) | 0 (0%) | 5.2  | 2.86 | 2   | 6      | 7  | 0   | 8         | 11 (100%)          | 0 (0%) | -2.8 | 2.86 | -6   | -2     | -1 | -8  | 0   |
|                  | Visit day 13     | 11 (100%) | 0 (0%) | 3.2  | 2.89 | 0   | 3      | 6  | 0   | 7         | 11 (100%)          | 0 (0%) | -4.8 | 2.89 | -8   | -5     | -2 | -8  | -1  |
| Follow-up day 15 | 11 (100%)        | 0 (0%)    | 3.5    | 2.66 | 1    | 3   | 6      | 0  | 7   | 11 (100%) | 0 (0%)             | -4.5   | 2.66 | -7   | -5   | -2     | -8 | -1  |     |
| Follow-up day 45 | 11 (100%)        | 0 (0%)    | 3.1    | 2.7  | 0    | 3   | 5      | 0  | 8   | 11 (100%) | 0 (0%)             | -4.9   | 2.7  | -8   | -5   | -3     | -8 | 0   |     |
| Placebo (n=12)   | Visit day 2      | 12 (100%) | 0 (0%) | 8    | 0    | 8   | 8      | 8  | 8   | 8         | 12 (100%)          | 0 (0%) | 0    | 0    | 0    | 0      | 0  | 0   | 0   |
|                  | Visit day 3      | 12 (100%) | 0 (0%) | 7.2  | 2.62 | 8   | 8      | 8  | 0   | 10        | 12 (100%)          | 0 (0%) | -0.8 | 2.62 | 0    | 0      | 0  | -8  | 2   |
|                  | Visit day 4      | 12 (100%) | 0 (0%) | 7.1  | 1.68 | 6.5 | 8      | 8  | 3   | 9         | 12 (100%)          | 0 (0%) | -0.9 | 1.68 | -1.5 | 0      | 0  | -5  | 1   |
|                  | Visit day 5      | 12 (100%) | 0 (0%) | 6.5  | 2.32 | 4.5 | 8      | 8  | 2   | 8         | 12 (100%)          | 0 (0%) | -1.5 | 2.32 | -3.5 | 0      | 0  | -6  | 0   |
|                  | Visit day 6      | 12 (100%) | 0 (0%) | 6.5  | 2.07 | 5   | 8      | 8  | 2   | 8         | 12 (100%)          | 0 (0%) | -1.5 | 2.07 | -3   | 0      | 0  | -6  | 0   |
|                  | Visit day 7      | 12 (100%) | 0 (0%) | 6.1  | 2.78 | 3.5 | 7.5    | 8  | 1   | 10        | 12 (100%)          | 0 (0%) | -1.9 | 2.78 | -4.5 | -0.5   | 0  | -7  | 2   |
|                  | Visit day 8      | 12 (100%) | 0 (0%) | 5.4  | 2.61 | 4   | 5      | 8  | 0   | 8         | 12 (100%)          | 0 (0%) | -2.6 | 2.61 | -4   | -3     | 0  | -8  | 0   |
|                  | Visit day 9      | 12 (100%) | 0 (0%) | 5.8  | 2.08 | 4.5 | 6      | 8  | 2   | 8         | 12 (100%)          | 0 (0%) | -2.2 | 2.08 | -3.5 | -2     | 0  | -6  | 0   |
|                  | Visit day 10     | 12 (100%) | 0 (0%) | 6    | 2.41 | 5   | 6.5    | 8  | 0   | 8         | 12 (100%)          | 0 (0%) | -2   | 2.41 | -3   | -1.5   | 0  | -8  | 0   |
|                  | Visit day 11     | 12 (100%) | 0 (0%) | 6.2  | 2.25 | 4.5 | 7.5    | 8  | 2   | 8         | 12 (100%)          | 0 (0%) | -1.8 | 2.25 | -3.5 | -0.5   | 0  | -6  | 0   |

| Treatment | Visit            | Result    |        |      |      |     |        |    |     |     |           | Change from usual* |      |      |      |        |    |     |     |
|-----------|------------------|-----------|--------|------|------|-----|--------|----|-----|-----|-----------|--------------------|------|------|------|--------|----|-----|-----|
|           |                  | n         | nmiss  | Mean | SD   | Q1  | Median | Q3 | Min | Max | n         | nmiss              | Mean | SD   | Q1   | Median | Q3 | Min | Max |
|           | Visit day 12     | 12 (100%) | 0 (0%) | 6    | 2.26 | 4.5 | 6.5    | 8  | 2   | 8   | 12 (100%) | 0 (0%)             | -2   | 2.26 | -3.5 | -1.5   | 0  | -6  | 0   |
|           | Visit day 13     | 12 (100%) | 0 (0%) | 5.3  | 2.93 | 3   | 6      | 8  | 0   | 8   | 12 (100%) | 0 (0%)             | -2.7 | 2.93 | -5   | -2     | 0  | -8  | 0   |
|           | Follow-up day 15 | 12 (100%) | 0 (0%) | 5.6  | 2.5  | 4   | 6      | 8  | 0   | 8   | 12 (100%) | 0 (0%)             | -2.4 | 2.5  | -4   | -2     | 0  | -8  | 0   |
|           | Follow-up day 45 | 12 (100%) | 0 (0%) | 5.6  | 2.5  | 4   | 6      | 8  | 0   | 8   | 12 (100%) | 0 (0%)             | -2.4 | 2.5  | -4   | -2     | 0  | -8  | 0   |

Executed script: \\SDS-SERVER2\SAS\$\SDS3\Projects\STATISTICS DRUG DEV\NBMI4011 - CTI002\Analyser\Script\SAS\T\_fs002.sas, on: 23MAY2016:14:00, by: maria.lidsell

Version of source data: nbmi\_ph3.sas7bdat, last modified: 24FEB16:23:13, status: Final

\*) Change for physical and mental fatigue score is defined as difference from 1=same as usual.

Table DE6.3.1 Change from usual of Mental Fatigue Score, Total (Full analysis set)

| Treatment        | Visit            | Result    |        |      |      |     |        |    |     |     | Change from usual* |        |      |      |      |        |    |     |     |
|------------------|------------------|-----------|--------|------|------|-----|--------|----|-----|-----|--------------------|--------|------|------|------|--------|----|-----|-----|
|                  |                  | n         | nmiss  | Mean | SD   | Q1  | Median | Q3 | Min | Max | n                  | nmiss  | Mean | SD   | Q1   | Median | Q3 | Min | Max |
| Total (n=36)     | Visit day 2      | 36 (100%) | 0 (0%) | 5    | 0    | 5   | 5      | 5  | 5   | 5   | 36 (100%)          | 0 (0%) | 0    | 0    | 0    | 0      | 0  | 0   | 0   |
|                  | Visit day 3      | 36 (100%) | 0 (0%) | 4.6  | 0.94 | 5   | 5      | 5  | 2   | 5   | 36 (100%)          | 0 (0%) | -0.4 | 0.94 | 0    | 0      | 0  | -3  | 0   |
|                  | Visit day 4      | 36 (100%) | 0 (0%) | 4.6  | 0.97 | 5   | 5      | 5  | 1   | 5   | 36 (100%)          | 0 (0%) | -0.4 | 0.97 | 0    | 0      | 0  | -4  | 0   |
|                  | Visit day 5      | 36 (100%) | 0 (0%) | 4.5  | 1.08 | 4.5 | 5      | 5  | 0   | 5   | 36 (100%)          | 0 (0%) | -0.5 | 1.08 | -0.5 | 0      | 0  | -5  | 0   |
|                  | Visit day 6      | 36 (100%) | 0 (0%) | 4.3  | 1.48 | 4   | 5      | 5  | 0   | 6   | 36 (100%)          | 0 (0%) | -0.8 | 1.48 | -1   | 0      | 0  | -5  | 1   |
|                  | Visit day 7      | 36 (100%) | 0 (0%) | 4.1  | 1.47 | 3   | 5      | 5  | 0   | 5   | 36 (100%)          | 0 (0%) | -0.9 | 1.47 | -2   | 0      | 0  | -5  | 0   |
|                  | Visit day 8      | 36 (100%) | 0 (0%) | 3.8  | 1.65 | 3   | 5      | 5  | 0   | 5   | 36 (100%)          | 0 (0%) | -1.2 | 1.65 | -2   | 0      | 0  | -5  | 0   |
|                  | Visit day 9      | 36 (100%) | 0 (0%) | 4.1  | 1.25 | 3   | 5      | 5  | 1   | 5   | 36 (100%)          | 0 (0%) | -0.9 | 1.25 | -2   | 0      | 0  | -4  | 0   |
|                  | Visit day 10     | 36 (100%) | 0 (0%) | 4.3  | 1.33 | 4   | 5      | 5  | 0   | 5   | 36 (100%)          | 0 (0%) | -0.7 | 1.33 | -1   | 0      | 0  | -5  | 0   |
|                  | Visit day 11     | 36 (100%) | 0 (0%) | 4.3  | 1.16 | 4   | 5      | 5  | 0   | 5   | 36 (100%)          | 0 (0%) | -0.7 | 1.16 | -1   | 0      | 0  | -5  | 0   |
|                  | Visit day 12     | 36 (100%) | 0 (0%) | 4.1  | 1.39 | 3   | 5      | 5  | 0   | 5   | 36 (100%)          | 0 (0%) | -0.9 | 1.39 | -2   | 0      | 0  | -5  | 0   |
|                  | Visit day 13     | 36 (100%) | 0 (0%) | 3.7  | 1.82 | 2.5 | 5      | 5  | 0   | 5   | 36 (100%)          | 0 (0%) | -1.3 | 1.82 | -2.5 | 0      | 0  | -5  | 0   |
|                  | Follow-up day 15 | 36 (100%) | 0 (0%) | 3.3  | 1.91 | 2   | 4      | 5  | 0   | 5   | 36 (100%)          | 0 (0%) | -1.7 | 1.91 | -3   | -1     | 0  | -5  | 0   |
|                  | Follow-up day 45 | 36 (100%) | 0 (0%) | 3.3  | 1.91 | 2   | 4      | 5  | 0   | 6   | 36 (100%)          | 0 (0%) | -1.7 | 1.91 | -3   | -1     | 0  | -5  | 1   |
| NBMI100mg (n=13) | Visit day 2      | 13 (100%) | 0 (0%) | 5    | 0    | 5   | 5      | 5  | 5   | 5   | 13 (100%)          | 0 (0%) | 0    | 0    | 0    | 0      | 0  | 0   | 0   |
|                  | Visit day 3      | 13 (100%) | 0 (0%) | 4.2  | 1.24 | 3   | 5      | 5  | 2   | 5   | 13 (100%)          | 0 (0%) | -0.8 | 1.24 | -2   | 0      | 0  | -3  | 0   |
|                  | Visit day 4      | 13 (100%) | 0 (0%) | 4.8  | 0.6  | 5   | 5      | 5  | 3   | 5   | 13 (100%)          | 0 (0%) | -0.2 | 0.6  | 0    | 0      | 0  | -2  | 0   |
|                  | Visit day 5      | 13 (100%) | 0 (0%) | 4.2  | 1.46 | 4   | 5      | 5  | 0   | 5   | 13 (100%)          | 0 (0%) | -0.8 | 1.46 | -1   | 0      | 0  | -5  | 0   |
|                  | Visit day 6      | 13 (100%) | 0 (0%) | 3.7  | 1.89 | 3   | 5      | 5  | 0   | 5   | 13 (100%)          | 0 (0%) | -1.3 | 1.89 | -2   | 0      | 0  | -5  | 0   |
|                  | Visit day 7      | 13 (100%) | 0 (0%) | 4.2  | 1.48 | 4   | 5      | 5  | 0   | 5   | 13 (100%)          | 0 (0%) | -0.8 | 1.48 | -1   | 0      | 0  | -5  | 0   |
|                  | Visit day 8      | 13 (100%) | 0 (0%) | 3.8  | 1.83 | 4   | 5      | 5  | 0   | 5   | 13 (100%)          | 0 (0%) | -1.2 | 1.83 | -1   | 0      | 0  | -5  | 0   |
|                  | Visit day 9      | 13 (100%) | 0 (0%) | 4.2  | 1.48 | 4   | 5      | 5  | 1   | 5   | 13 (100%)          | 0 (0%) | -0.8 | 1.48 | -1   | 0      | 0  | -4  | 0   |
|                  | Visit day 10     | 13 (100%) | 0 (0%) | 4.2  | 1.68 | 4   | 5      | 5  | 0   | 5   | 13 (100%)          | 0 (0%) | -0.8 | 1.68 | -1   | 0      | 0  | -5  | 0   |
|                  | Visit day 11     | 13 (100%) | 0 (0%) | 4.4  | 0.96 | 4   | 5      | 5  | 2   | 5   | 13 (100%)          | 0 (0%) | -0.6 | 0.96 | -1   | 0      | 0  | -3  | 0   |
|                  | Visit day 12     | 13 (100%) | 0 (0%) | 4.3  | 0.85 | 4   | 5      | 5  | 3   | 5   | 13 (100%)          | 0 (0%) | -0.7 | 0.85 | -1   | 0      | 0  | -2  | 0   |

| Treatment        | Visit            | Result    |        |      |      |     |        |    |     |           | Change from usual* |        |      |      |      |        |    |     |     |
|------------------|------------------|-----------|--------|------|------|-----|--------|----|-----|-----------|--------------------|--------|------|------|------|--------|----|-----|-----|
|                  |                  | n         | nmiss  | Mean | SD   | Q1  | Median | Q3 | Min | Max       | n                  | nmiss  | Mean | SD   | Q1   | Median | Q3 | Min | Max |
| NBMI300mg (n=11) | Visit day 13     | 13 (100%) | 0 (0%) | 3.8  | 1.92 | 3   | 5      | 5  | 0   | 5         | 13 (100%)          | 0 (0%) | -1.2 | 1.92 | -2   | 0      | 0  | -5  | 0   |
|                  | Follow-up day 15 | 13 (100%) | 0 (0%) | 3    | 2    | 2   | 4      | 5  | 0   | 5         | 13 (100%)          | 0 (0%) | -2   | 2    | -3   | -1     | 0  | -5  | 0   |
|                  | Follow-up day 45 | 13 (100%) | 0 (0%) | 3.7  | 1.89 | 2   | 5      | 5  | 0   | 6         | 13 (100%)          | 0 (0%) | -1.3 | 1.89 | -3   | 0      | 0  | -5  | 1   |
|                  | Visit day 2      | 11 (100%) | 0 (0%) | 5    | 0    | 5   | 5      | 5  | 5   | 5         | 11 (100%)          | 0 (0%) | 0    | 0    | 0    | 0      | 0  | 0   | 0   |
|                  | Visit day 3      | 11 (100%) | 0 (0%) | 4.8  | 0.6  | 5   | 5      | 5  | 3   | 5         | 11 (100%)          | 0 (0%) | -0.2 | 0.6  | 0    | 0      | 0  | -2  | 0   |
|                  | Visit day 4      | 11 (100%) | 0 (0%) | 4.5  | 1.04 | 5   | 5      | 5  | 2   | 5         | 11 (100%)          | 0 (0%) | -0.5 | 1.04 | 0    | 0      | 0  | -3  | 0   |
|                  | Visit day 5      | 11 (100%) | 0 (0%) | 4.8  | 0.4  | 5   | 5      | 5  | 4   | 5         | 11 (100%)          | 0 (0%) | -0.2 | 0.4  | 0    | 0      | 0  | -1  | 0   |
|                  | Visit day 6      | 11 (100%) | 0 (0%) | 4.6  | 1.29 | 5   | 5      | 5  | 1   | 6         | 11 (100%)          | 0 (0%) | -0.4 | 1.29 | 0    | 0      | 0  | -4  | 1   |
|                  | Visit day 7      | 11 (100%) | 0 (0%) | 4    | 1.55 | 3   | 5      | 5  | 0   | 5         | 11 (100%)          | 0 (0%) | -1   | 1.55 | -2   | 0      | 0  | -5  | 0   |
|                  | Visit day 8      | 11 (100%) | 0 (0%) | 3.9  | 1.3  | 3   | 4      | 5  | 1   | 5         | 11 (100%)          | 0 (0%) | -1.1 | 1.3  | -2   | -1     | 0  | -4  | 0   |
|                  | Visit day 9      | 11 (100%) | 0 (0%) | 3.9  | 1.14 | 3   | 4      | 5  | 2   | 5         | 11 (100%)          | 0 (0%) | -1.1 | 1.14 | -2   | -1     | 0  | -3  | 0   |
|                  | Visit day 10     | 11 (100%) | 0 (0%) | 4.5  | 1.04 | 4   | 5      | 5  | 2   | 5         | 11 (100%)          | 0 (0%) | -0.5 | 1.04 | -1   | 0      | 0  | -3  | 0   |
|                  | Visit day 11     | 11 (100%) | 0 (0%) | 4    | 1.61 | 4   | 5      | 5  | 0   | 5         | 11 (100%)          | 0 (0%) | -1   | 1.61 | -1   | 0      | 0  | -5  | 0   |
|                  | Visit day 12     | 11 (100%) | 0 (0%) | 3.8  | 1.78 | 3   | 5      | 5  | 0   | 5         | 11 (100%)          | 0 (0%) | -1.2 | 1.78 | -2   | 0      | 0  | -5  | 0   |
|                  | Visit day 13     | 11 (100%) | 0 (0%) | 3.4  | 2.01 | 1   | 5      | 5  | 0   | 5         | 11 (100%)          | 0 (0%) | -1.6 | 2.01 | -4   | 0      | 0  | -5  | 0   |
| Follow-up day 15 | 11 (100%)        | 0 (0%)    | 2.8    | 2.04 | 1    | 4   | 5      | 0  | 5   | 11 (100%) | 0 (0%)             | -2.2   | 2.04 | -4   | -1   | 0      | -5 | 0   |     |
| Follow-up day 45 | 11 (100%)        | 0 (0%)    | 2.7    | 2.05 | 0    | 4   | 4      | 0  | 5   | 11 (100%) | 0 (0%)             | -2.3   | 2.05 | -5   | -1   | -1     | -5 | 0   |     |
| Placebo (n=12)   | Visit day 2      | 12 (100%) | 0 (0%) | 5    | 0    | 5   | 5      | 5  | 5   | 5         | 12 (100%)          | 0 (0%) | 0    | 0    | 0    | 0      | 0  | 0   | 0   |
|                  | Visit day 3      | 12 (100%) | 0 (0%) | 4.7  | 0.78 | 5   | 5      | 5  | 3   | 5         | 12 (100%)          | 0 (0%) | -0.3 | 0.78 | 0    | 0      | 0  | -2  | 0   |
|                  | Visit day 4      | 12 (100%) | 0 (0%) | 4.4  | 1.24 | 4.5 | 5      | 5  | 1   | 5         | 12 (100%)          | 0 (0%) | -0.6 | 1.24 | -0.5 | 0      | 0  | -4  | 0   |
|                  | Visit day 5      | 12 (100%) | 0 (0%) | 4.6  | 1    | 5   | 5      | 5  | 2   | 5         | 12 (100%)          | 0 (0%) | -0.4 | 1    | 0    | 0      | 0  | -3  | 0   |
|                  | Visit day 6      | 12 (100%) | 0 (0%) | 4.5  | 1    | 4.5 | 5      | 5  | 2   | 5         | 12 (100%)          | 0 (0%) | -0.5 | 1    | -0.5 | 0      | 0  | -3  | 0   |
|                  | Visit day 7      | 12 (100%) | 0 (0%) | 3.9  | 1.51 | 2.5 | 5      | 5  | 1   | 5         | 12 (100%)          | 0 (0%) | -1.1 | 1.51 | -2.5 | 0      | 0  | -4  | 0   |
|                  | Visit day 8      | 12 (100%) | 0 (0%) | 3.8  | 1.85 | 2.5 | 5      | 5  | 0   | 5         | 12 (100%)          | 0 (0%) | -1.2 | 1.85 | -2.5 | 0      | 0  | -5  | 0   |
|                  | Visit day 9      | 12 (100%) | 0 (0%) | 4.3  | 1.14 | 3   | 5      | 5  | 2   | 5         | 12 (100%)          | 0 (0%) | -0.8 | 1.14 | -2   | 0      | 0  | -3  | 0   |
|                  | Visit day 10     | 12 (100%) | 0 (0%) | 4.3  | 1.23 | 4   | 5      | 5  | 1   | 5         | 12 (100%)          | 0 (0%) | -0.7 | 1.23 | -1   | 0      | 0  | -4  | 0   |
|                  | Visit day 11     | 12 (100%) | 0 (0%) | 4.4  | 0.9  | 3.5 | 5      | 5  | 3   | 5         | 12 (100%)          | 0 (0%) | -0.6 | 0.9  | -1.5 | 0      | 0  | -2  | 0   |

| Treatment | Visit            | Result    |        |      |      |     |        |    |     |     |           | Change from usual* |      |      |      |        |    |     |     |  |  |
|-----------|------------------|-----------|--------|------|------|-----|--------|----|-----|-----|-----------|--------------------|------|------|------|--------|----|-----|-----|--|--|
|           |                  | n         | nmiss  | Mean | SD   | Q1  | Median | Q3 | Min | Max | n         | nmiss              | Mean | SD   | Q1   | Median | Q3 | Min | Max |  |  |
|           | Visit day 12     | 12 (100%) | 0 (0%) | 4    | 1.54 | 2.5 | 5      | 5  | 1   | 5   | 12 (100%) | 0 (0%)             | -1   | 1.54 | -2.5 | 0      | 0  | -4  | 0   |  |  |
|           | Visit day 13     | 12 (100%) | 0 (0%) | 3.9  | 1.62 | 3   | 5      | 5  | 0   | 5   | 12 (100%) | 0 (0%)             | -1.1 | 1.62 | -2   | 0      | 0  | -5  | 0   |  |  |
|           | Follow-up day 15 | 12 (100%) | 0 (0%) | 4.1  | 1.56 | 3   | 5      | 5  | 0   | 5   | 12 (100%) | 0 (0%)             | -0.9 | 1.56 | -2   | 0      | 0  | -5  | 0   |  |  |
|           | Follow-up day 45 | 12 (100%) | 0 (0%) | 3.5  | 1.83 | 2   | 4.5    | 5  | 0   | 5   | 12 (100%) | 0 (0%)             | -1.5 | 1.83 | -3   | -0.5   | 0  | -5  | 0   |  |  |

Executed script: \\SDS-SERVER2\SAS\$\SDS3\Projects\STATISTICS DRUG DEV\NBMI4011 - CTI002\Analyser\Script\SAS\T\_fs002.sas, on: 23MAY2016:14:00, by: maria.lidsell

Version of source data: nbmi\_ph3.sas7bdat, last modified: 24FEB16:23:13, status: Final

\*) Change for physical and mental fatigue score is defined as difference from 1=same as usual.



Table DE7.1.1 Categorical summary of change from usual of Physical and mental fatigue score item - Physical Fatigue Score, tired (Full analysis set)

| Treatment    | Visit            | Result*     |                        |                   |               | Change from usual** |           |             |             |           |
|--------------|------------------|-------------|------------------------|-------------------|---------------|---------------------|-----------|-------------|-------------|-----------|
|              |                  | n           | much better than usual | better than usual | same as usual | worse than usual    | n         | -1          | 0           | 1         |
| Total (n=36) | Visit day 2      | 36 (100%)   |                        |                   | 36 (100%)     |                     | 36 (100%) |             | 36 (100%)   |           |
|              | Visit day 3      | 36 (100%)   | 2 (5.56%)              | 6 (16.67%)        | 28 (77.78%)   |                     | 36 (100%) | 8 (22.22%)  | 28 (77.78%) |           |
|              | Visit day 4      | 36 (100%)   |                        | 8 (22.22%)        | 28 (77.78%)   |                     | 36 (100%) | 8 (22.22%)  | 28 (77.78%) |           |
|              | Visit day 5      | 36 (100%)   | 2 (5.56%)              | 8 (22.22%)        | 26 (72.22%)   |                     | 36 (100%) | 10 (27.78%) | 26 (72.22%) |           |
|              | Visit day 6      | 36 (100%)   | 1 (2.78%)              | 7 (19.44%)        | 28 (77.78%)   |                     | 36 (100%) | 8 (22.22%)  | 28 (77.78%) |           |
|              | Visit day 7      | 36 (100%)   | 1 (2.78%)              | 9 (25%)           | 24 (66.67%)   | 2 (5.56%)           | 36 (100%) | 10 (27.78%) | 24 (66.67%) | 2 (5.56%) |
|              | Visit day 8      | 36 (100%)   | 3 (8.33%)              | 12 (33.33%)       | 21 (58.33%)   |                     | 36 (100%) | 15 (41.67%) | 21 (58.33%) |           |
|              | Visit day 9      | 36 (100%)   | 1 (2.78%)              | 11 (30.56%)       | 24 (66.67%)   |                     | 36 (100%) | 12 (33.33%) | 24 (66.67%) |           |
|              | Visit day 10     | 36 (100%)   | 3 (8.33%)              | 10 (27.78%)       | 23 (63.89%)   |                     | 36 (100%) | 13 (36.11%) | 23 (63.89%) |           |
|              | Visit day 11     | 36 (100%)   | 3 (8.33%)              | 7 (19.44%)        | 26 (72.22%)   |                     | 36 (100%) | 10 (27.78%) | 26 (72.22%) |           |
|              | Visit day 12     | 36 (100%)   | 3 (8.33%)              | 8 (22.22%)        | 25 (69.44%)   |                     | 36 (100%) | 11 (30.56%) | 25 (69.44%) |           |
|              | Visit day 13     | 36 (100%)   | 8 (22.22%)             | 9 (25%)           | 19 (52.78%)   |                     | 36 (100%) | 17 (47.22%) | 19 (52.78%) |           |
|              | Follow-up day 15 | 36 (100%)   | 7 (19.44%)             | 15 (41.67%)       | 14 (38.89%)   |                     | 36 (100%) | 22 (61.11%) | 14 (38.89%) |           |
|              | Follow-up day 45 | 36 (100%)   | 5 (13.89%)             | 15 (41.67%)       | 16 (44.44%)   |                     | 36 (100%) | 20 (55.56%) | 16 (44.44%) |           |
|              | NBMI100mg (n=13) | Visit day 2 | 13 (100%)              |                   |               | 13 (100%)           |           | 13 (100%)   |             | 13 (100%) |
| Visit day 3  |                  | 13 (100%)   | 1 (7.69%)              | 2 (15.38%)        | 10 (76.92%)   |                     | 13 (100%) | 3 (23.08%)  | 10 (76.92%) |           |
| Visit day 4  |                  | 13 (100%)   |                        | 2 (15.38%)        | 11 (84.62%)   |                     | 13 (100%) | 2 (15.38%)  | 11 (84.62%) |           |
| Visit day 5  |                  | 13 (100%)   | 1 (7.69%)              | 2 (15.38%)        | 10 (76.92%)   |                     | 13 (100%) | 3 (23.08%)  | 10 (76.92%) |           |
| Visit day 6  |                  | 13 (100%)   | 1 (7.69%)              | 1 (7.69%)         | 11 (84.62%)   |                     | 13 (100%) | 2 (15.38%)  | 11 (84.62%) |           |
| Visit day 7  |                  | 13 (100%)   |                        | 2 (15.38%)        | 11 (84.62%)   |                     | 13 (100%) | 2 (15.38%)  | 11 (84.62%) |           |
| Visit day 8  |                  | 13 (100%)   | 1 (7.69%)              | 3 (23.08%)        | 9 (69.23%)    |                     | 13 (100%) | 4 (30.77%)  | 9 (69.23%)  |           |
| Visit day 9  |                  | 13 (100%)   |                        | 2 (15.38%)        | 11 (84.62%)   |                     | 13 (100%) | 2 (15.38%)  | 11 (84.62%) |           |
| Visit day 10 |                  | 13 (100%)   | 2 (15.38%)             | 2 (15.38%)        | 9 (69.23%)    |                     | 13 (100%) | 4 (30.77%)  | 9 (69.23%)  |           |
| Visit day 11 |                  | 13 (100%)   | 1 (7.69%)              | 1 (7.69%)         | 11 (84.62%)   |                     | 13 (100%) | 2 (15.38%)  | 11 (84.62%) |           |

| Treatment        | Visit            | Result*   |                        |                   |               | Change from usual** |            |            |             |           |
|------------------|------------------|-----------|------------------------|-------------------|---------------|---------------------|------------|------------|-------------|-----------|
|                  |                  | n         | much better than usual | better than usual | same as usual | worse than usual    | n          | -1         | 0           | 1         |
| NBMI300mg (n=11) | Visit day 12     | 13 (100%) | 1 (7.69%)              | 1 (7.69%)         | 11 (84.62%)   |                     | 13 (100%)  | 2 (15.38%) | 11 (84.62%) |           |
|                  | Visit day 13     | 13 (100%) | 4 (30.77%)             | 2 (15.38%)        | 7 (53.85%)    |                     | 13 (100%)  | 6 (46.15%) | 7 (53.85%)  |           |
|                  | Follow-up day 15 | 13 (100%) | 5 (38.46%)             | 3 (23.08%)        | 5 (38.46%)    |                     | 13 (100%)  | 8 (61.54%) | 5 (38.46%)  |           |
|                  | Follow-up day 45 | 13 (100%) | 2 (15.38%)             | 4 (30.77%)        | 7 (53.85%)    |                     | 13 (100%)  | 6 (46.15%) | 7 (53.85%)  |           |
|                  | Visit day 2      | 11 (100%) |                        |                   | 11 (100%)     |                     | 11 (100%)  |            | 11 (100%)   |           |
|                  | Visit day 3      | 11 (100%) | 1 (9.09%)              | 2 (18.18%)        | 8 (72.73%)    |                     | 11 (100%)  | 3 (27.27%) | 8 (72.73%)  |           |
|                  | Visit day 4      | 11 (100%) |                        | 3 (27.27%)        | 8 (72.73%)    |                     | 11 (100%)  | 3 (27.27%) | 8 (72.73%)  |           |
|                  | Visit day 5      | 11 (100%) |                        | 3 (27.27%)        | 8 (72.73%)    |                     | 11 (100%)  | 3 (27.27%) | 8 (72.73%)  |           |
|                  | Visit day 6      | 11 (100%) |                        | 1 (9.09%)         | 10 (90.91%)   |                     | 11 (100%)  | 1 (9.09%)  | 10 (90.91%) |           |
|                  | Visit day 7      | 11 (100%) | 1 (9.09%)              | 3 (27.27%)        | 6 (54.55%)    | 1 (9.09%)           | 11 (100%)  | 4 (36.36%) | 6 (54.55%)  | 1 (9.09%) |
|                  | Visit day 8      | 11 (100%) |                        | 5 (45.45%)        | 6 (54.55%)    |                     | 11 (100%)  | 5 (45.45%) | 6 (54.55%)  |           |
|                  | Visit day 9      | 11 (100%) | 1 (9.09%)              | 4 (36.36%)        | 6 (54.55%)    |                     | 11 (100%)  | 5 (45.45%) | 6 (54.55%)  |           |
|                  | Visit day 10     | 11 (100%) | 1 (9.09%)              | 4 (36.36%)        | 6 (54.55%)    |                     | 11 (100%)  | 5 (45.45%) | 6 (54.55%)  |           |
|                  | Visit day 11     | 11 (100%) | 2 (18.18%)             | 3 (27.27%)        | 6 (54.55%)    |                     | 11 (100%)  | 5 (45.45%) | 6 (54.55%)  |           |
|                  | Visit day 12     | 11 (100%) | 1 (9.09%)              | 3 (27.27%)        | 7 (63.64%)    |                     | 11 (100%)  | 4 (36.36%) | 7 (63.64%)  |           |
|                  | Visit day 13     | 11 (100%) | 3 (27.27%)             | 3 (27.27%)        | 5 (45.45%)    |                     | 11 (100%)  | 6 (54.55%) | 5 (45.45%)  |           |
|                  | Follow-up day 15 | 11 (100%) | 2 (18.18%)             | 6 (54.55%)        | 3 (27.27%)    |                     | 11 (100%)  | 8 (72.73%) | 3 (27.27%)  |           |
| Follow-up day 45 | 11 (100%)        | 1 (9.09%) | 7 (63.64%)             | 3 (27.27%)        |               | 11 (100%)           | 8 (72.73%) | 3 (27.27%) |             |           |
| Placebo (n=12)   | Visit day 2      | 12 (100%) |                        |                   | 12 (100%)     |                     | 12 (100%)  |            | 12 (100%)   |           |
|                  | Visit day 3      | 12 (100%) |                        | 2 (16.67%)        | 10 (83.33%)   |                     | 12 (100%)  | 2 (16.67%) | 10 (83.33%) |           |
|                  | Visit day 4      | 12 (100%) |                        | 3 (25%)           | 9 (75%)       |                     | 12 (100%)  | 3 (25%)    | 9 (75%)     |           |
|                  | Visit day 5      | 12 (100%) | 1 (8.33%)              | 3 (25%)           | 8 (66.67%)    |                     | 12 (100%)  | 4 (33.33%) | 8 (66.67%)  |           |
|                  | Visit day 6      | 12 (100%) |                        | 5 (41.67%)        | 7 (58.33%)    |                     | 12 (100%)  | 5 (41.67%) | 7 (58.33%)  |           |
|                  | Visit day 7      | 12 (100%) |                        | 4 (33.33%)        | 7 (58.33%)    | 1 (8.33%)           | 12 (100%)  | 4 (33.33%) | 7 (58.33%)  | 1 (8.33%) |
|                  | Visit day 8      | 12 (100%) | 2 (16.67%)             | 4 (33.33%)        | 6 (50%)       |                     | 12 (100%)  | 6 (50%)    | 6 (50%)     |           |
|                  | Visit day 9      | 12 (100%) |                        | 5 (41.67%)        | 7 (58.33%)    |                     | 12 (100%)  | 5 (41.67%) | 7 (58.33%)  |           |

| Treatment | Visit            | Result*   |                        |                   |               | Change from usual** |           |            |            |   |
|-----------|------------------|-----------|------------------------|-------------------|---------------|---------------------|-----------|------------|------------|---|
|           |                  | n         | much better than usual | better than usual | same as usual | worse than usual    | n         | -1         | 0          | 1 |
|           | Visit day 10     | 12 (100%) |                        | 4 (33.33%)        | 8 (66.67%)    |                     | 12 (100%) | 4 (33.33%) | 8 (66.67%) |   |
|           | Visit day 11     | 12 (100%) |                        | 3 (25%)           | 9 (75%)       |                     | 12 (100%) | 3 (25%)    | 9 (75%)    |   |
|           | Visit day 12     | 12 (100%) | 1 (8.33%)              | 4 (33.33%)        | 7 (58.33%)    |                     | 12 (100%) | 5 (41.67%) | 7 (58.33%) |   |
|           | Visit day 13     | 12 (100%) | 1 (8.33%)              | 4 (33.33%)        | 7 (58.33%)    |                     | 12 (100%) | 5 (41.67%) | 7 (58.33%) |   |
|           | Follow-up day 15 | 12 (100%) |                        | 6 (50%)           | 6 (50%)       |                     | 12 (100%) | 6 (50%)    | 6 (50%)    |   |
|           | Follow-up day 45 | 12 (100%) | 2 (16.67%)             | 4 (33.33%)        | 6 (50%)       |                     | 12 (100%) | 6 (50%)    | 6 (50%)    |   |

Executed script: \\SDS-SERVER2\SAS\$\SDS3\Projects\STATISTICS DRUG DEV\NBMI4011 - CTI002\Analyser\Script\SAS\T\_fs003.sas, on: 23MAY2016:14:00, by: maria.lidsell

Version of source data: nbmi\_ph3.sas7bdat, last modified: 24FEB16:23:13, status: Final

\*) Scores are counted according to: much better than usual=0, better than usual=0, same as usual=1, worse than usual=2, much worse than usual=3.

\*\*\*) Change for physical and mental fatigue score is defined as difference from 1=same as usual.

Table DE7.2.1 Categorical summary of change from usual of Physical and mental fatigue score item - Physical Fatigue Score, need to rest (Full analysis set)

| Treatment    | Visit            | Result*     |                        |                   |               | Change from usual** |           |             |             |           |
|--------------|------------------|-------------|------------------------|-------------------|---------------|---------------------|-----------|-------------|-------------|-----------|
|              |                  | n           | much better than usual | better than usual | same as usual | worse than usual    | n         | -1          | 0           | 1         |
| Total (n=36) | Visit day 2      | 36 (100%)   |                        | 1 (2.78%)         | 35 (97.22%)   |                     | 36 (100%) | 1 (2.78%)   | 35 (97.22%) |           |
|              | Visit day 3      | 36 (100%)   |                        | 7 (19.44%)        | 28 (77.78%)   | 1 (2.78%)           | 36 (100%) | 7 (19.44%)  | 28 (77.78%) | 1 (2.78%) |
|              | Visit day 4      | 36 (100%)   |                        | 8 (22.22%)        | 28 (77.78%)   |                     | 36 (100%) | 8 (22.22%)  | 28 (77.78%) |           |
|              | Visit day 5      | 36 (100%)   |                        | 5 (13.89%)        | 31 (86.11%)   |                     | 36 (100%) | 5 (13.89%)  | 31 (86.11%) |           |
|              | Visit day 6      | 36 (100%)   | 1 (2.78%)              | 6 (16.67%)        | 29 (80.56%)   |                     | 36 (100%) | 7 (19.44%)  | 29 (80.56%) |           |
|              | Visit day 7      | 36 (100%)   | 1 (2.78%)              | 11 (30.56%)       | 23 (63.89%)   | 1 (2.78%)           | 36 (100%) | 12 (33.33%) | 23 (63.89%) | 1 (2.78%) |
|              | Visit day 8      | 36 (100%)   | 2 (5.56%)              | 9 (25%)           | 25 (69.44%)   |                     | 36 (100%) | 11 (30.56%) | 25 (69.44%) |           |
|              | Visit day 9      | 36 (100%)   | 1 (2.78%)              | 9 (25%)           | 25 (69.44%)   | 1 (2.78%)           | 36 (100%) | 10 (27.78%) | 25 (69.44%) | 1 (2.78%) |
|              | Visit day 10     | 36 (100%)   | 1 (2.78%)              | 7 (19.44%)        | 28 (77.78%)   |                     | 36 (100%) | 8 (22.22%)  | 28 (77.78%) |           |
|              | Visit day 11     | 36 (100%)   | 2 (5.56%)              | 5 (13.89%)        | 29 (80.56%)   |                     | 36 (100%) | 7 (19.44%)  | 29 (80.56%) |           |
|              | Visit day 12     | 36 (100%)   | 2 (5.56%)              | 6 (16.67%)        | 28 (77.78%)   |                     | 36 (100%) | 8 (22.22%)  | 28 (77.78%) |           |
|              | Visit day 13     | 36 (100%)   | 4 (11.11%)             | 11 (30.56%)       | 21 (58.33%)   |                     | 36 (100%) | 15 (41.67%) | 21 (58.33%) |           |
|              | Follow-up day 15 | 36 (100%)   | 4 (11.11%)             | 9 (25%)           | 23 (63.89%)   |                     | 36 (100%) | 13 (36.11%) | 23 (63.89%) |           |
|              | Follow-up day 45 | 36 (100%)   | 5 (13.89%)             | 8 (22.22%)        | 21 (58.33%)   | 2 (5.56%)           | 36 (100%) | 13 (36.11%) | 21 (58.33%) | 2 (5.56%) |
|              | NBMH100mg (n=13) | Visit day 2 | 13 (100%)              |                   |               | 13 (100%)           |           | 13 (100%)   |             | 13 (100%) |
| Visit day 3  |                  | 13 (100%)   |                        | 3 (23.08%)        | 10 (76.92%)   |                     | 13 (100%) | 3 (23.08%)  | 10 (76.92%) |           |
| Visit day 4  |                  | 13 (100%)   |                        | 2 (15.38%)        | 11 (84.62%)   |                     | 13 (100%) | 2 (15.38%)  | 11 (84.62%) |           |
| Visit day 5  |                  | 13 (100%)   |                        | 3 (23.08%)        | 10 (76.92%)   |                     | 13 (100%) | 3 (23.08%)  | 10 (76.92%) |           |
| Visit day 6  |                  | 13 (100%)   | 1 (7.69%)              | 2 (15.38%)        | 10 (76.92%)   |                     | 13 (100%) | 3 (23.08%)  | 10 (76.92%) |           |
| Visit day 7  |                  | 13 (100%)   |                        | 3 (23.08%)        | 10 (76.92%)   |                     | 13 (100%) | 3 (23.08%)  | 10 (76.92%) |           |
| Visit day 8  |                  | 13 (100%)   | 1 (7.69%)              | 3 (23.08%)        | 9 (69.23%)    |                     | 13 (100%) | 4 (30.77%)  | 9 (69.23%)  |           |
| Visit day 9  |                  | 13 (100%)   |                        | 3 (23.08%)        | 9 (69.23%)    | 1 (7.69%)           | 13 (100%) | 3 (23.08%)  | 9 (69.23%)  | 1 (7.69%) |
| Visit day 10 |                  | 13 (100%)   | 1 (7.69%)              | 2 (15.38%)        | 10 (76.92%)   |                     | 13 (100%) | 3 (23.08%)  | 10 (76.92%) |           |

| Treatment        | Visit            | Result*    |                        |                   |               | Change from usual** |            |            |             |            |
|------------------|------------------|------------|------------------------|-------------------|---------------|---------------------|------------|------------|-------------|------------|
|                  |                  | n          | much better than usual | better than usual | same as usual | worse than usual    | n          | -1         | 0           | 1          |
| NBMI300mg (n=11) | Visit day 11     | 13 (100%)  | 1 (7.69%)              | 1 (7.69%)         | 11 (84.62%)   |                     | 13 (100%)  | 2 (15.38%) | 11 (84.62%) |            |
|                  | Visit day 12     | 13 (100%)  | 1 (7.69%)              | 1 (7.69%)         | 11 (84.62%)   |                     | 13 (100%)  | 2 (15.38%) | 11 (84.62%) |            |
|                  | Visit day 13     | 13 (100%)  | 1 (7.69%)              | 3 (23.08%)        | 9 (69.23%)    |                     | 13 (100%)  | 4 (30.77%) | 9 (69.23%)  |            |
|                  | Follow-up day 15 | 13 (100%)  | 3 (23.08%)             | 2 (15.38%)        | 8 (61.54%)    |                     | 13 (100%)  | 5 (38.46%) | 8 (61.54%)  |            |
|                  | Follow-up day 45 | 13 (100%)  | 2 (15.38%)             | 3 (23.08%)        | 6 (46.15%)    | 2 (15.38%)          | 13 (100%)  | 5 (38.46%) | 6 (46.15%)  | 2 (15.38%) |
|                  | Visit day 2      | 11 (100%)  |                        | 1 (9.09%)         | 10 (90.91%)   |                     | 11 (100%)  | 1 (9.09%)  | 10 (90.91%) |            |
|                  | Visit day 3      | 11 (100%)  |                        | 3 (27.27%)        | 8 (72.73%)    |                     | 11 (100%)  | 3 (27.27%) | 8 (72.73%)  |            |
|                  | Visit day 4      | 11 (100%)  |                        | 4 (36.36%)        | 7 (63.64%)    |                     | 11 (100%)  | 4 (36.36%) | 7 (63.64%)  |            |
|                  | Visit day 5      | 11 (100%)  |                        | 1 (9.09%)         | 10 (90.91%)   |                     | 11 (100%)  | 1 (9.09%)  | 10 (90.91%) |            |
|                  | Visit day 6      | 11 (100%)  |                        | 2 (18.18%)        | 9 (81.82%)    |                     | 11 (100%)  | 2 (18.18%) | 9 (81.82%)  |            |
|                  | Visit day 7      | 11 (100%)  | 1 (9.09%)              | 3 (27.27%)        | 7 (63.64%)    |                     | 11 (100%)  | 4 (36.36%) | 7 (63.64%)  |            |
|                  | Visit day 8      | 11 (100%)  |                        | 3 (27.27%)        | 8 (72.73%)    |                     | 11 (100%)  | 3 (27.27%) | 8 (72.73%)  |            |
|                  | Visit day 9      | 11 (100%)  |                        | 4 (36.36%)        | 7 (63.64%)    |                     | 11 (100%)  | 4 (36.36%) | 7 (63.64%)  |            |
|                  | Visit day 10     | 11 (100%)  |                        | 3 (27.27%)        | 8 (72.73%)    |                     | 11 (100%)  | 3 (27.27%) | 8 (72.73%)  |            |
|                  | Visit day 11     | 11 (100%)  | 1 (9.09%)              | 3 (27.27%)        | 7 (63.64%)    |                     | 11 (100%)  | 4 (36.36%) | 7 (63.64%)  |            |
| Visit day 12     | 11 (100%)        | 1 (9.09%)  | 2 (18.18%)             | 8 (72.73%)        |               | 11 (100%)           | 3 (27.27%) | 8 (72.73%) |             |            |
| Visit day 13     | 11 (100%)        | 2 (18.18%) | 4 (36.36%)             | 5 (45.45%)        |               | 11 (100%)           | 6 (54.55%) | 5 (45.45%) |             |            |
| Follow-up day 15 | 11 (100%)        |            | 5 (45.45%)             | 6 (54.55%)        |               | 11 (100%)           | 5 (45.45%) | 6 (54.55%) |             |            |
| Follow-up day 45 | 11 (100%)        | 2 (18.18%) | 4 (36.36%)             | 5 (45.45%)        |               | 11 (100%)           | 6 (54.55%) | 5 (45.45%) |             |            |
| Placebo (n=12)   | Visit day 2      | 12 (100%)  |                        |                   | 12 (100%)     |                     | 12 (100%)  |            | 12 (100%)   |            |
|                  | Visit day 3      | 12 (100%)  |                        | 1 (8.33%)         | 10 (83.33%)   | 1 (8.33%)           | 12 (100%)  | 1 (8.33%)  | 10 (83.33%) | 1 (8.33%)  |
|                  | Visit day 4      | 12 (100%)  |                        | 2 (16.67%)        | 10 (83.33%)   |                     | 12 (100%)  | 2 (16.67%) | 10 (83.33%) |            |
|                  | Visit day 5      | 12 (100%)  |                        | 1 (8.33%)         | 11 (91.67%)   |                     | 12 (100%)  | 1 (8.33%)  | 11 (91.67%) |            |
|                  | Visit day 6      | 12 (100%)  |                        | 2 (16.67%)        | 10 (83.33%)   |                     | 12 (100%)  | 2 (16.67%) | 10 (83.33%) |            |
|                  | Visit day 7      | 12 (100%)  |                        | 5 (41.67%)        | 6 (50%)       | 1 (8.33%)           | 12 (100%)  | 5 (41.67%) | 6 (50%)     | 1 (8.33%)  |
|                  | Visit day 8      | 12 (100%)  | 1 (8.33%)              | 3 (25%)           | 8 (66.67%)    |                     | 12 (100%)  | 4 (33.33%) | 8 (66.67%)  |            |

| Treatment | Visit            | Result*   |                        |                   |               | Change from usual** |            |             |   |
|-----------|------------------|-----------|------------------------|-------------------|---------------|---------------------|------------|-------------|---|
|           |                  | n         | much better than usual | better than usual | same as usual | worse than usual    | n          | -1          | 0 |
|           | Visit day 9      | 12 (100%) | 1 (8.33%)              | 2 (16.67%)        | 9 (75%)       | 12 (100%)           | 3 (25%)    | 9 (75%)     |   |
|           | Visit day 10     | 12 (100%) |                        | 2 (16.67%)        | 10 (83.33%)   | 12 (100%)           | 2 (16.67%) | 10 (83.33%) |   |
|           | Visit day 11     | 12 (100%) |                        | 1 (8.33%)         | 11 (91.67%)   | 12 (100%)           | 1 (8.33%)  | 11 (91.67%) |   |
|           | Visit day 12     | 12 (100%) |                        | 3 (25%)           | 9 (75%)       | 12 (100%)           | 3 (25%)    | 9 (75%)     |   |
|           | Visit day 13     | 12 (100%) | 1 (8.33%)              | 4 (33.33%)        | 7 (58.33%)    | 12 (100%)           | 5 (41.67%) | 7 (58.33%)  |   |
|           | Follow-up day 15 | 12 (100%) | 1 (8.33%)              | 2 (16.67%)        | 9 (75%)       | 12 (100%)           | 3 (25%)    | 9 (75%)     |   |
|           | Follow-up day 45 | 12 (100%) | 1 (8.33%)              | 1 (8.33%)         | 10 (83.33%)   | 12 (100%)           | 2 (16.67%) | 10 (83.33%) |   |

Executed script: \\SDS-SERVER2\SAS\$\SDS3\Projects\STATISTICS DRUG DEV\NBMI4011 - CTI002\Analyser\Script\SAS\T\_fs003.sas, on: 23MAY2016:14:00, by: maria.lidsell

Version of source data: nbmi\_ph3.sas7bdat, last modified: 24FEB16:23:13, status: Final

\*) Scores are counted according to: much better than usual=0, better than usual=0, same as usual=1, worse than usual=2, much worse than usual=3.

\*\*) Change for physical and mental fatigue score is defined as difference from 1=same as usual.

Table DE7.3.1 Categorical summary of change from usual of Physical and mental fatigue score item - Physical Fatigue Score, feel sleepy or drowsy (Full analysis set)

| Treatment    | Visit            | Result*     |                        |                   |               | Change from usual** |           |             |             |           |
|--------------|------------------|-------------|------------------------|-------------------|---------------|---------------------|-----------|-------------|-------------|-----------|
|              |                  | n           | much better than usual | better than usual | same as usual | worse than usual    | n         | -1          | 0           | 1         |
| Total (n=36) | Visit day 2      | 36 (100%)   |                        |                   | 36 (100%)     |                     | 36 (100%) |             | 36 (100%)   |           |
|              | Visit day 3      | 36 (100%)   |                        | 4 (11.11%)        | 31 (86.11%)   | 1 (2.78%)           | 36 (100%) | 4 (11.11%)  | 31 (86.11%) | 1 (2.78%) |
|              | Visit day 4      | 36 (100%)   |                        | 4 (11.11%)        | 30 (83.33%)   | 2 (5.56%)           | 36 (100%) | 4 (11.11%)  | 30 (83.33%) | 2 (5.56%) |
|              | Visit day 5      | 36 (100%)   | 1 (2.78%)              | 4 (11.11%)        | 30 (83.33%)   | 1 (2.78%)           | 36 (100%) | 5 (13.89%)  | 30 (83.33%) | 1 (2.78%) |
|              | Visit day 6      | 36 (100%)   |                        | 7 (19.44%)        | 29 (80.56%)   |                     | 36 (100%) | 7 (19.44%)  | 29 (80.56%) |           |
|              | Visit day 7      | 36 (100%)   | 1 (2.78%)              | 8 (22.22%)        | 27 (75%)      |                     | 36 (100%) | 9 (25%)     | 27 (75%)    |           |
|              | Visit day 8      | 36 (100%)   | 3 (8.33%)              | 7 (19.44%)        | 26 (72.22%)   |                     | 36 (100%) | 10 (27.78%) | 26 (72.22%) |           |
|              | Visit day 9      | 36 (100%)   | 2 (5.56%)              | 7 (19.44%)        | 26 (72.22%)   | 1 (2.78%)           | 36 (100%) | 9 (25%)     | 26 (72.22%) | 1 (2.78%) |
|              | Visit day 10     | 36 (100%)   | 2 (5.56%)              | 8 (22.22%)        | 24 (66.67%)   | 2 (5.56%)           | 36 (100%) | 10 (27.78%) | 24 (66.67%) | 2 (5.56%) |
|              | Visit day 11     | 36 (100%)   | 4 (11.11%)             | 8 (22.22%)        | 24 (66.67%)   |                     | 36 (100%) | 12 (33.33%) | 24 (66.67%) |           |
|              | Visit day 12     | 36 (100%)   | 3 (8.33%)              | 8 (22.22%)        | 25 (69.44%)   |                     | 36 (100%) | 11 (30.56%) | 25 (69.44%) |           |
|              | Visit day 13     | 36 (100%)   | 6 (16.67%)             | 10 (27.78%)       | 19 (52.78%)   | 1 (2.78%)           | 36 (100%) | 16 (44.44%) | 19 (52.78%) | 1 (2.78%) |
|              | Follow-up day 15 | 36 (100%)   | 4 (11.11%)             | 12 (33.33%)       | 20 (55.56%)   |                     | 36 (100%) | 16 (44.44%) | 20 (55.56%) |           |
|              | Follow-up day 45 | 36 (100%)   | 6 (16.67%)             | 13 (36.11%)       | 17 (47.22%)   |                     | 36 (100%) | 19 (52.78%) | 17 (47.22%) |           |
|              | NBMH100mg (n=13) | Visit day 2 | 13 (100%)              |                   |               | 13 (100%)           |           | 13 (100%)   |             | 13 (100%) |
| Visit day 3  |                  | 13 (100%)   |                        | 2 (15.38%)        | 11 (84.62%)   |                     | 13 (100%) | 2 (15.38%)  | 11 (84.62%) |           |
| Visit day 4  |                  | 13 (100%)   |                        | 1 (7.69%)         | 12 (92.31%)   |                     | 13 (100%) | 1 (7.69%)   | 12 (92.31%) |           |
| Visit day 5  |                  | 13 (100%)   | 1 (7.69%)              | 1 (7.69%)         | 10 (76.92%)   | 1 (7.69%)           | 13 (100%) | 2 (15.38%)  | 10 (76.92%) | 1 (7.69%) |
| Visit day 6  |                  | 13 (100%)   |                        | 2 (15.38%)        | 11 (84.62%)   |                     | 13 (100%) | 2 (15.38%)  | 11 (84.62%) |           |
| Visit day 7  |                  | 13 (100%)   |                        | 2 (15.38%)        | 11 (84.62%)   |                     | 13 (100%) | 2 (15.38%)  | 11 (84.62%) |           |
| Visit day 8  |                  | 13 (100%)   |                        | 3 (23.08%)        | 10 (76.92%)   |                     | 13 (100%) | 3 (23.08%)  | 10 (76.92%) |           |
| Visit day 9  |                  | 13 (100%)   | 1 (7.69%)              | 2 (15.38%)        | 9 (69.23%)    | 1 (7.69%)           | 13 (100%) | 3 (23.08%)  | 9 (69.23%)  | 1 (7.69%) |
| Visit day 10 |                  | 13 (100%)   | 1 (7.69%)              | 3 (23.08%)        | 8 (61.54%)    | 1 (7.69%)           | 13 (100%) | 4 (30.77%)  | 8 (61.54%)  | 1 (7.69%) |

| Treatment        | Visit            | Result*    |                        |                   |               |                  | Change from usual** |            |             |           |
|------------------|------------------|------------|------------------------|-------------------|---------------|------------------|---------------------|------------|-------------|-----------|
|                  |                  | n          | much better than usual | better than usual | same as usual | worse than usual | n                   | -1         | 0           | 1         |
| NBMI300mg (n=11) | Visit day 11     | 13 (100%)  | 2 (15.38%)             | 2 (15.38%)        | 9 (69.23%)    |                  | 13 (100%)           | 4 (30.77%) | 9 (69.23%)  |           |
|                  | Visit day 12     | 13 (100%)  | 1 (7.69%)              | 3 (23.08%)        | 9 (69.23%)    |                  | 13 (100%)           | 4 (30.77%) | 9 (69.23%)  |           |
|                  | Visit day 13     | 13 (100%)  | 2 (15.38%)             | 3 (23.08%)        | 7 (53.85%)    | 1 (7.69%)        | 13 (100%)           | 5 (38.46%) | 7 (53.85%)  | 1 (7.69%) |
|                  | Follow-up day 15 | 13 (100%)  | 3 (23.08%)             | 3 (23.08%)        | 7 (53.85%)    |                  | 13 (100%)           | 6 (46.15%) | 7 (53.85%)  |           |
|                  | Follow-up day 45 | 13 (100%)  | 1 (7.69%)              | 4 (30.77%)        | 8 (61.54%)    |                  | 13 (100%)           | 5 (38.46%) | 8 (61.54%)  |           |
|                  | Visit day 2      | 11 (100%)  |                        |                   | 11 (100%)     |                  | 11 (100%)           |            | 11 (100%)   |           |
|                  | Visit day 3      | 11 (100%)  |                        | 1 (9.09%)         | 10 (90.91%)   |                  | 11 (100%)           | 1 (9.09%)  | 10 (90.91%) |           |
|                  | Visit day 4      | 11 (100%)  |                        | 2 (18.18%)        | 8 (72.73%)    | 1 (9.09%)        | 11 (100%)           | 2 (18.18%) | 8 (72.73%)  | 1 (9.09%) |
|                  | Visit day 5      | 11 (100%)  |                        | 1 (9.09%)         | 10 (90.91%)   |                  | 11 (100%)           | 1 (9.09%)  | 10 (90.91%) |           |
|                  | Visit day 6      | 11 (100%)  |                        | 4 (36.36%)        | 7 (63.64%)    |                  | 11 (100%)           | 4 (36.36%) | 7 (63.64%)  |           |
|                  | Visit day 7      | 11 (100%)  | 1 (9.09%)              | 4 (36.36%)        | 6 (54.55%)    |                  | 11 (100%)           | 5 (45.45%) | 6 (54.55%)  |           |
|                  | Visit day 8      | 11 (100%)  | 1 (9.09%)              | 3 (27.27%)        | 7 (63.64%)    |                  | 11 (100%)           | 4 (36.36%) | 7 (63.64%)  |           |
|                  | Visit day 9      | 11 (100%)  | 1 (9.09%)              | 4 (36.36%)        | 6 (54.55%)    |                  | 11 (100%)           | 5 (45.45%) | 6 (54.55%)  |           |
|                  | Visit day 10     | 11 (100%)  | 1 (9.09%)              | 4 (36.36%)        | 5 (45.45%)    | 1 (9.09%)        | 11 (100%)           | 5 (45.45%) | 5 (45.45%)  | 1 (9.09%) |
|                  | Visit day 11     | 11 (100%)  | 2 (18.18%)             | 3 (27.27%)        | 6 (54.55%)    |                  | 11 (100%)           | 5 (45.45%) | 6 (54.55%)  |           |
| Visit day 12     | 11 (100%)        | 2 (18.18%) | 2 (18.18%)             | 7 (63.64%)        |               | 11 (100%)        | 4 (36.36%)          | 7 (63.64%) |             |           |
| Visit day 13     | 11 (100%)        | 3 (27.27%) | 4 (36.36%)             | 4 (36.36%)        |               | 11 (100%)        | 7 (63.64%)          | 4 (36.36%) |             |           |
| Follow-up day 15 | 11 (100%)        | 1 (9.09%)  | 6 (54.55%)             | 4 (36.36%)        |               | 11 (100%)        | 7 (63.64%)          | 4 (36.36%) |             |           |
| Follow-up day 45 | 11 (100%)        | 4 (36.36%) | 5 (45.45%)             | 2 (18.18%)        |               | 11 (100%)        | 9 (81.82%)          | 2 (18.18%) |             |           |
| Placebo (n=12)   | Visit day 2      | 12 (100%)  |                        |                   | 12 (100%)     |                  | 12 (100%)           |            | 12 (100%)   |           |
|                  | Visit day 3      | 12 (100%)  |                        | 1 (8.33%)         | 10 (83.33%)   | 1 (8.33%)        | 12 (100%)           | 1 (8.33%)  | 10 (83.33%) | 1 (8.33%) |
|                  | Visit day 4      | 12 (100%)  |                        | 1 (8.33%)         | 10 (83.33%)   | 1 (8.33%)        | 12 (100%)           | 1 (8.33%)  | 10 (83.33%) | 1 (8.33%) |
|                  | Visit day 5      | 12 (100%)  |                        | 2 (16.67%)        | 10 (83.33%)   |                  | 12 (100%)           | 2 (16.67%) | 10 (83.33%) |           |
|                  | Visit day 6      | 12 (100%)  |                        | 1 (8.33%)         | 11 (91.67%)   |                  | 12 (100%)           | 1 (8.33%)  | 11 (91.67%) |           |
|                  | Visit day 7      | 12 (100%)  |                        | 2 (16.67%)        | 10 (83.33%)   |                  | 12 (100%)           | 2 (16.67%) | 10 (83.33%) |           |
|                  | Visit day 8      | 12 (100%)  | 2 (16.67%)             | 1 (8.33%)         | 9 (75%)       |                  | 12 (100%)           | 3 (25%)    | 9 (75%)     |           |



| Treatment | Visit            | Result*   |                        |                   |               | Change from usual** |            |             |   |
|-----------|------------------|-----------|------------------------|-------------------|---------------|---------------------|------------|-------------|---|
|           |                  | n         | much better than usual | better than usual | same as usual | worse than usual    | n          | -1          | 0 |
|           | Visit day 9      | 12 (100%) |                        | 1 (8.33%)         | 11 (91.67%)   | 12 (100%)           | 1 (8.33%)  | 11 (91.67%) |   |
|           | Visit day 10     | 12 (100%) |                        | 1 (8.33%)         | 11 (91.67%)   | 12 (100%)           | 1 (8.33%)  | 11 (91.67%) |   |
|           | Visit day 11     | 12 (100%) |                        | 3 (25%)           | 9 (75%)       | 12 (100%)           | 3 (25%)    | 9 (75%)     |   |
|           | Visit day 12     | 12 (100%) |                        | 3 (25%)           | 9 (75%)       | 12 (100%)           | 3 (25%)    | 9 (75%)     |   |
|           | Visit day 13     | 12 (100%) | 1 (8.33%)              | 3 (25%)           | 8 (66.67%)    | 12 (100%)           | 4 (33.33%) | 8 (66.67%)  |   |
|           | Follow-up day 15 | 12 (100%) |                        | 3 (25%)           | 9 (75%)       | 12 (100%)           | 3 (25%)    | 9 (75%)     |   |
|           | Follow-up day 45 | 12 (100%) | 1 (8.33%)              | 4 (33.33%)        | 7 (58.33%)    | 12 (100%)           | 5 (41.67%) | 7 (58.33%)  |   |

Executed script: \\SDS-SERVER2\SAS\$\SDS3\Projects\STATISTICS DRUG DEV\NBMI4011 - CTI002\Analyser\Script\SAS\T\_fs003.sas, on: 23MAY2016:14:00, by: maria.lidsell

Version of source data: nbmi\_ph3.sas7bdat, last modified: 24FEB16:23:13, status: Final

\*) Scores are counted according to: much better than usual=0, better than usual=0, same as usual=1, worse than usual=2, much worse than usual=3.

\*\*) Change for physical and mental fatigue score is defined as difference from 1=same as usual.

Table DE7.4.1 Categorical summary of change from usual of Physical and mental fatigue score item - Physical Fatigue Score, no longer start anything (Full analysis set)

| Treatment        | Visit            | Result*   |                        |                   |               | Change from usual** |             |             |   |
|------------------|------------------|-----------|------------------------|-------------------|---------------|---------------------|-------------|-------------|---|
|                  |                  | n         | much better than usual | better than usual | same as usual | worse than usual    | n           | -1          | 0 |
| Total (n=36)     | Visit day 2      | 36 (100%) |                        |                   | 36 (100%)     | 36 (100%)           |             | 36 (100%)   |   |
|                  | Visit day 3      | 36 (100%) |                        | 3 (8.33%)         | 33 (91.67%)   | 36 (100%)           | 3 (8.33%)   | 33 (91.67%) |   |
|                  | Visit day 4      | 36 (100%) |                        | 2 (5.56%)         | 34 (94.44%)   | 36 (100%)           | 2 (5.56%)   | 34 (94.44%) |   |
|                  | Visit day 5      | 36 (100%) |                        | 2 (5.56%)         | 34 (94.44%)   | 36 (100%)           | 2 (5.56%)   | 34 (94.44%) |   |
|                  | Visit day 6      | 36 (100%) |                        | 5 (13.89%)        | 31 (86.11%)   | 36 (100%)           | 5 (13.89%)  | 31 (86.11%) |   |
|                  | Visit day 7      | 36 (100%) | 1 (2.78%)              | 5 (13.89%)        | 30 (83.33%)   | 36 (100%)           | 6 (16.67%)  | 30 (83.33%) |   |
|                  | Visit day 8      | 36 (100%) | 2 (5.56%)              | 3 (8.33%)         | 31 (86.11%)   | 36 (100%)           | 5 (13.89%)  | 31 (86.11%) |   |
|                  | Visit day 9      | 36 (100%) |                        | 3 (8.33%)         | 33 (91.67%)   | 36 (100%)           | 3 (8.33%)   | 33 (91.67%) |   |
|                  | Visit day 10     | 36 (100%) |                        | 5 (13.89%)        | 31 (86.11%)   | 36 (100%)           | 5 (13.89%)  | 31 (86.11%) |   |
|                  | Visit day 11     | 36 (100%) | 1 (2.78%)              | 3 (8.33%)         | 32 (88.89%)   | 36 (100%)           | 4 (11.11%)  | 32 (88.89%) |   |
|                  | Visit day 12     | 36 (100%) | 2 (5.56%)              |                   | 34 (94.44%)   | 36 (100%)           | 2 (5.56%)   | 34 (94.44%) |   |
|                  | Visit day 13     | 36 (100%) | 4 (11.11%)             | 5 (13.89%)        | 27 (75%)      | 36 (100%)           | 9 (25%)     | 27 (75%)    |   |
|                  | Follow-up day 15 | 36 (100%) | 4 (11.11%)             | 4 (11.11%)        | 28 (77.78%)   | 36 (100%)           | 8 (22.22%)  | 28 (77.78%) |   |
|                  | Follow-up day 45 | 36 (100%) | 4 (11.11%)             | 8 (22.22%)        | 24 (66.67%)   | 36 (100%)           | 12 (33.33%) | 24 (66.67%) |   |
| NBMH100mg (n=13) | Visit day 2      | 13 (100%) |                        |                   | 13 (100%)     | 13 (100%)           |             | 13 (100%)   |   |
|                  | Visit day 3      | 13 (100%) |                        | 2 (15.38%)        | 11 (84.62%)   | 13 (100%)           | 2 (15.38%)  | 11 (84.62%) |   |
|                  | Visit day 4      | 13 (100%) |                        |                   | 13 (100%)     | 13 (100%)           |             | 13 (100%)   |   |
|                  | Visit day 5      | 13 (100%) |                        | 1 (7.69%)         | 12 (92.31%)   | 13 (100%)           | 1 (7.69%)   | 12 (92.31%) |   |
|                  | Visit day 6      | 13 (100%) |                        | 2 (15.38%)        | 11 (84.62%)   | 13 (100%)           | 2 (15.38%)  | 11 (84.62%) |   |
|                  | Visit day 7      | 13 (100%) |                        | 3 (23.08%)        | 10 (76.92%)   | 13 (100%)           | 3 (23.08%)  | 10 (76.92%) |   |
|                  | Visit day 8      | 13 (100%) |                        | 2 (15.38%)        | 11 (84.62%)   | 13 (100%)           | 2 (15.38%)  | 11 (84.62%) |   |
|                  | Visit day 9      | 13 (100%) |                        |                   | 13 (100%)     | 13 (100%)           |             | 13 (100%)   |   |
|                  | Visit day 10     | 13 (100%) |                        | 2 (15.38%)        | 11 (84.62%)   | 13 (100%)           | 2 (15.38%)  | 11 (84.62%) |   |

| Treatment        | Visit            | Result*   |                        |                   |               | Change from usual** |           |            |             |   |
|------------------|------------------|-----------|------------------------|-------------------|---------------|---------------------|-----------|------------|-------------|---|
|                  |                  | n         | much better than usual | better than usual | same as usual | worse than usual    | n         | -1         | 0           | 1 |
| NBMI300mg (n=11) | Visit day 11     | 13 (100%) |                        |                   | 13 (100%)     |                     | 13 (100%) |            | 13 (100%)   |   |
|                  | Visit day 12     | 13 (100%) |                        |                   | 13 (100%)     |                     | 13 (100%) |            | 13 (100%)   |   |
|                  | Visit day 13     | 13 (100%) | 1 (7.69%)              | 1 (7.69%)         | 11 (84.62%)   |                     | 13 (100%) | 2 (15.38%) | 11 (84.62%) |   |
|                  | Follow-up day 15 | 13 (100%) | 2 (15.38%)             | 1 (7.69%)         | 10 (76.92%)   |                     | 13 (100%) | 3 (23.08%) | 10 (76.92%) |   |
|                  | Follow-up day 45 | 13 (100%) | 2 (15.38%)             | 1 (7.69%)         | 10 (76.92%)   |                     | 13 (100%) | 3 (23.08%) | 10 (76.92%) |   |
|                  | Visit day 2      | 11 (100%) |                        |                   | 11 (100%)     |                     | 11 (100%) |            | 11 (100%)   |   |
|                  | Visit day 3      | 11 (100%) |                        |                   | 11 (100%)     |                     | 11 (100%) |            | 11 (100%)   |   |
|                  | Visit day 4      | 11 (100%) |                        | 2 (18.18%)        | 9 (81.82%)    |                     | 11 (100%) | 2 (18.18%) | 9 (81.82%)  |   |
|                  | Visit day 5      | 11 (100%) |                        |                   | 11 (100%)     |                     | 11 (100%) |            | 11 (100%)   |   |
|                  | Visit day 6      | 11 (100%) |                        | 1 (9.09%)         | 10 (90.91%)   |                     | 11 (100%) | 1 (9.09%)  | 10 (90.91%) |   |
|                  | Visit day 7      | 11 (100%) | 1 (9.09%)              | 1 (9.09%)         | 9 (81.82%)    |                     | 11 (100%) | 2 (18.18%) | 9 (81.82%)  |   |
|                  | Visit day 8      | 11 (100%) |                        |                   | 11 (100%)     |                     | 11 (100%) |            | 11 (100%)   |   |
|                  | Visit day 9      | 11 (100%) |                        | 2 (18.18%)        | 9 (81.82%)    |                     | 11 (100%) | 2 (18.18%) | 9 (81.82%)  |   |
|                  | Visit day 10     | 11 (100%) |                        | 2 (18.18%)        | 9 (81.82%)    |                     | 11 (100%) | 2 (18.18%) | 9 (81.82%)  |   |
|                  | Visit day 11     | 11 (100%) | 1 (9.09%)              | 2 (18.18%)        | 8 (72.73%)    |                     | 11 (100%) | 3 (27.27%) | 8 (72.73%)  |   |
|                  | Visit day 12     | 11 (100%) | 2 (18.18%)             |                   | 9 (81.82%)    |                     | 11 (100%) | 2 (18.18%) | 9 (81.82%)  |   |
|                  | Visit day 13     | 11 (100%) | 2 (18.18%)             | 3 (27.27%)        | 6 (54.55%)    |                     | 11 (100%) | 5 (45.45%) | 6 (54.55%)  |   |
|                  | Follow-up day 15 | 11 (100%) | 2 (18.18%)             | 2 (18.18%)        | 7 (63.64%)    |                     | 11 (100%) | 4 (36.36%) | 7 (63.64%)  |   |
|                  | Follow-up day 45 | 11 (100%) | 1 (9.09%)              | 5 (45.45%)        | 5 (45.45%)    |                     | 11 (100%) | 6 (54.55%) | 5 (45.45%)  |   |
| Placebo (n=12)   | Visit day 2      | 12 (100%) |                        |                   | 12 (100%)     |                     | 12 (100%) |            | 12 (100%)   |   |
|                  | Visit day 3      | 12 (100%) |                        | 1 (8.33%)         | 11 (91.67%)   |                     | 12 (100%) | 1 (8.33%)  | 11 (91.67%) |   |
|                  | Visit day 4      | 12 (100%) |                        |                   | 12 (100%)     |                     | 12 (100%) |            | 12 (100%)   |   |
|                  | Visit day 5      | 12 (100%) |                        | 1 (8.33%)         | 11 (91.67%)   |                     | 12 (100%) | 1 (8.33%)  | 11 (91.67%) |   |
|                  | Visit day 6      | 12 (100%) |                        | 2 (16.67%)        | 10 (83.33%)   |                     | 12 (100%) | 2 (16.67%) | 10 (83.33%) |   |
|                  | Visit day 7      | 12 (100%) |                        | 1 (8.33%)         | 11 (91.67%)   |                     | 12 (100%) | 1 (8.33%)  | 11 (91.67%) |   |
|                  | Visit day 8      | 12 (100%) | 2 (16.67%)             | 1 (8.33%)         | 9 (75%)       |                     | 12 (100%) | 3 (25%)    | 9 (75%)     |   |

| Treatment | Visit            | Result*   |                        |                   |               | Change from usual** |            |             |   |
|-----------|------------------|-----------|------------------------|-------------------|---------------|---------------------|------------|-------------|---|
|           |                  | n         | much better than usual | better than usual | same as usual | worse than usual    | n          | -1          | 0 |
|           | Visit day 9      | 12 (100%) |                        | 1 (8.33%)         | 11 (91.67%)   | 12 (100%)           | 1 (8.33%)  | 11 (91.67%) |   |
|           | Visit day 10     | 12 (100%) |                        | 1 (8.33%)         | 11 (91.67%)   | 12 (100%)           | 1 (8.33%)  | 11 (91.67%) |   |
|           | Visit day 11     | 12 (100%) |                        | 1 (8.33%)         | 11 (91.67%)   | 12 (100%)           | 1 (8.33%)  | 11 (91.67%) |   |
|           | Visit day 12     | 12 (100%) |                        |                   | 12 (100%)     | 12 (100%)           |            | 12 (100%)   |   |
|           | Visit day 13     | 12 (100%) | 1 (8.33%)              | 1 (8.33%)         | 10 (83.33%)   | 12 (100%)           | 2 (16.67%) | 10 (83.33%) |   |
|           | Follow-up day 15 | 12 (100%) |                        | 1 (8.33%)         | 11 (91.67%)   | 12 (100%)           | 1 (8.33%)  | 11 (91.67%) |   |
|           | Follow-up day 45 | 12 (100%) | 1 (8.33%)              | 2 (16.67%)        | 9 (75%)       | 12 (100%)           | 3 (25%)    | 9 (75%)     |   |

Executed script: \\SDS-SERVER2\SAS\$\SDS3\Projects\STATISTICS DRUG DEV\NBMI4011 - CTI002\Analyser\Script\SAS\T\_fs003.sas, on: 23MAY2016:14:00, by: maria.lidsell

Version of source data: nbmi\_ph3.sas7bdat, last modified: 24FEB16:23:13, status: Final

\*) Scores are counted according to: much better than usual=0, better than usual=0, same as usual=1, worse than usual=2, much worse than usual=3.

\*\*) Change for physical and mental fatigue score is defined as difference from 1=same as usual.

Table DE7.5.1 Categorical summary of change from usual of Physical and mental fatigue score item - Physical Fatigue Score, always lack energy (Full analysis set)

| Treatment    | Visit            | Result*     |                        |                   |               | Change from usual** |           |             |             |           |
|--------------|------------------|-------------|------------------------|-------------------|---------------|---------------------|-----------|-------------|-------------|-----------|
|              |                  | n           | much better than usual | better than usual | same as usual | worse than usual    | n         | -1          | 0           | 1         |
| Total (n=36) | Visit day 2      | 36 (100%)   |                        |                   | 36 (100%)     |                     | 36 (100%) | 36 (100%)   |             |           |
|              | Visit day 3      | 36 (100%)   | 1 (2.78%)              | 11 (30.56%)       | 24 (66.67%)   |                     | 36 (100%) | 12 (33.33%) | 24 (66.67%) |           |
|              | Visit day 4      | 36 (100%)   | 5 (13.89%)             | 8 (22.22%)        | 23 (63.89%)   |                     | 36 (100%) | 13 (36.11%) | 23 (63.89%) |           |
|              | Visit day 5      | 36 (100%)   | 6 (16.67%)             | 8 (22.22%)        | 22 (61.11%)   |                     | 36 (100%) | 14 (38.89%) | 22 (61.11%) |           |
|              | Visit day 6      | 36 (100%)   | 7 (19.44%)             | 10 (27.78%)       | 19 (52.78%)   |                     | 36 (100%) | 17 (47.22%) | 19 (52.78%) |           |
|              | Visit day 7      | 36 (100%)   | 4 (11.11%)             | 15 (41.67%)       | 17 (47.22%)   |                     | 36 (100%) | 19 (52.78%) | 17 (47.22%) |           |
|              | Visit day 8      | 36 (100%)   | 7 (19.44%)             | 14 (38.89%)       | 15 (41.67%)   |                     | 36 (100%) | 21 (58.33%) | 15 (41.67%) |           |
|              | Visit day 9      | 36 (100%)   | 6 (16.67%)             | 15 (41.67%)       | 14 (38.89%)   | 1 (2.78%)           | 36 (100%) | 21 (58.33%) | 14 (38.89%) | 1 (2.78%) |
|              | Visit day 10     | 36 (100%)   | 9 (25%)                | 12 (33.33%)       | 15 (41.67%)   |                     | 36 (100%) | 21 (58.33%) | 15 (41.67%) |           |
|              | Visit day 11     | 36 (100%)   | 13 (36.11%)            | 11 (30.56%)       | 12 (33.33%)   |                     | 36 (100%) | 24 (66.67%) | 12 (33.33%) |           |
|              | Visit day 12     | 36 (100%)   | 11 (30.56%)            | 9 (25%)           | 16 (44.44%)   |                     | 36 (100%) | 20 (55.56%) | 16 (44.44%) |           |
|              | Visit day 13     | 36 (100%)   | 13 (36.11%)            | 12 (33.33%)       | 11 (30.56%)   |                     | 36 (100%) | 25 (69.44%) | 11 (30.56%) |           |
|              | Follow-up day 15 | 36 (100%)   | 12 (33.33%)            | 15 (41.67%)       | 9 (25%)       |                     | 36 (100%) | 27 (75%)    | 9 (25%)     |           |
|              | Follow-up day 45 | 36 (100%)   | 10 (27.78%)            | 17 (47.22%)       | 8 (22.22%)    | 1 (2.78%)           | 36 (100%) | 27 (75%)    | 8 (22.22%)  | 1 (2.78%) |
|              | NBMH100mg (n=13) | Visit day 2 | 13 (100%)              |                   |               | 13 (100%)           |           | 13 (100%)   | 13 (100%)   |           |
| Visit day 3  |                  | 13 (100%)   |                        | 5 (38.46%)        | 8 (61.54%)    |                     | 13 (100%) | 5 (38.46%)  | 8 (61.54%)  |           |
| Visit day 4  |                  | 13 (100%)   | 4 (30.77%)             | 2 (15.38%)        | 7 (53.85%)    |                     | 13 (100%) | 6 (46.15%)  | 7 (53.85%)  |           |
| Visit day 5  |                  | 13 (100%)   | 3 (23.08%)             | 3 (23.08%)        | 7 (53.85%)    |                     | 13 (100%) | 6 (46.15%)  | 7 (53.85%)  |           |
| Visit day 6  |                  | 13 (100%)   | 5 (38.46%)             | 2 (15.38%)        | 6 (46.15%)    |                     | 13 (100%) | 7 (53.85%)  | 6 (46.15%)  |           |
| Visit day 7  |                  | 13 (100%)   | 2 (15.38%)             | 4 (30.77%)        | 7 (53.85%)    |                     | 13 (100%) | 6 (46.15%)  | 7 (53.85%)  |           |
| Visit day 8  |                  | 13 (100%)   | 3 (23.08%)             | 3 (23.08%)        | 7 (53.85%)    |                     | 13 (100%) | 6 (46.15%)  | 7 (53.85%)  |           |
| Visit day 9  |                  | 13 (100%)   | 1 (7.69%)              | 6 (46.15%)        | 6 (46.15%)    |                     | 13 (100%) | 7 (53.85%)  | 6 (46.15%)  |           |
| Visit day 10 |                  | 13 (100%)   | 3 (23.08%)             | 4 (30.77%)        | 6 (46.15%)    |                     | 13 (100%) | 7 (53.85%)  | 6 (46.15%)  |           |

| Treatment        | Visit            | Result*    |                        |                   |               | Change from usual** |             |             |             |           |
|------------------|------------------|------------|------------------------|-------------------|---------------|---------------------|-------------|-------------|-------------|-----------|
|                  |                  | n          | much better than usual | better than usual | same as usual | worse than usual    | n           | -1          | 0           | 1         |
| NBMI300mg (n=11) | Visit day 11     | 13 (100%)  | 6 (46.15%)             | 2 (15.38%)        | 5 (38.46%)    |                     | 13 (100%)   | 8 (61.54%)  | 5 (38.46%)  |           |
|                  | Visit day 12     | 13 (100%)  | 5 (38.46%)             | 1 (7.69%)         | 7 (53.85%)    |                     | 13 (100%)   | 6 (46.15%)  | 7 (53.85%)  |           |
|                  | Visit day 13     | 13 (100%)  | 4 (30.77%)             | 4 (30.77%)        | 5 (38.46%)    |                     | 13 (100%)   | 8 (61.54%)  | 5 (38.46%)  |           |
|                  | Follow-up day 15 | 13 (100%)  | 5 (38.46%)             | 3 (23.08%)        | 5 (38.46%)    |                     | 13 (100%)   | 8 (61.54%)  | 5 (38.46%)  |           |
|                  | Follow-up day 45 | 13 (100%)  | 6 (46.15%)             | 5 (38.46%)        | 1 (7.69%)     | 1 (7.69%)           | 13 (100%)   | 11 (84.62%) | 1 (7.69%)   | 1 (7.69%) |
|                  | Visit day 2      | 11 (100%)  |                        |                   | 11 (100%)     |                     | 11 (100%)   |             | 11 (100%)   |           |
|                  | Visit day 3      | 11 (100%)  | 1 (9.09%)              | 4 (36.36%)        | 6 (54.55%)    |                     | 11 (100%)   | 5 (45.45%)  | 6 (54.55%)  |           |
|                  | Visit day 4      | 11 (100%)  |                        | 4 (36.36%)        | 7 (63.64%)    |                     | 11 (100%)   | 4 (36.36%)  | 7 (63.64%)  |           |
|                  | Visit day 5      | 11 (100%)  | 2 (18.18%)             | 3 (27.27%)        | 6 (54.55%)    |                     | 11 (100%)   | 5 (45.45%)  | 6 (54.55%)  |           |
|                  | Visit day 6      | 11 (100%)  | 2 (18.18%)             | 4 (36.36%)        | 5 (45.45%)    |                     | 11 (100%)   | 6 (54.55%)  | 5 (45.45%)  |           |
|                  | Visit day 7      | 11 (100%)  | 2 (18.18%)             | 6 (54.55%)        | 3 (27.27%)    |                     | 11 (100%)   | 8 (72.73%)  | 3 (27.27%)  |           |
|                  | Visit day 8      | 11 (100%)  | 2 (18.18%)             | 6 (54.55%)        | 3 (27.27%)    |                     | 11 (100%)   | 8 (72.73%)  | 3 (27.27%)  |           |
|                  | Visit day 9      | 11 (100%)  | 2 (18.18%)             | 5 (45.45%)        | 3 (27.27%)    | 1 (9.09%)           | 11 (100%)   | 7 (63.64%)  | 3 (27.27%)  | 1 (9.09%) |
|                  | Visit day 10     | 11 (100%)  | 5 (45.45%)             | 2 (18.18%)        | 4 (36.36%)    |                     | 11 (100%)   | 7 (63.64%)  | 4 (36.36%)  |           |
|                  | Visit day 11     | 11 (100%)  | 6 (54.55%)             | 4 (36.36%)        | 1 (9.09%)     |                     | 11 (100%)   | 10 (90.91%) | 1 (9.09%)   |           |
| Visit day 12     | 11 (100%)        | 4 (36.36%) | 4 (36.36%)             | 3 (27.27%)        |               | 11 (100%)           | 8 (72.73%)  | 3 (27.27%)  |             |           |
| Visit day 13     | 11 (100%)        | 6 (54.55%) | 4 (36.36%)             | 1 (9.09%)         |               | 11 (100%)           | 10 (90.91%) | 1 (9.09%)   |             |           |
| Follow-up day 15 | 11 (100%)        | 4 (36.36%) | 6 (54.55%)             | 1 (9.09%)         |               | 11 (100%)           | 10 (90.91%) | 1 (9.09%)   |             |           |
| Follow-up day 45 | 11 (100%)        | 3 (27.27%) | 6 (54.55%)             | 2 (18.18%)        |               | 11 (100%)           | 9 (81.82%)  | 2 (18.18%)  |             |           |
| Placebo (n=12)   | Visit day 2      | 12 (100%)  |                        |                   | 12 (100%)     |                     | 12 (100%)   |             | 12 (100%)   |           |
|                  | Visit day 3      | 12 (100%)  |                        | 2 (16.67%)        | 10 (83.33%)   |                     | 12 (100%)   | 2 (16.67%)  | 10 (83.33%) |           |
|                  | Visit day 4      | 12 (100%)  | 1 (8.33%)              | 2 (16.67%)        | 9 (75%)       |                     | 12 (100%)   | 3 (25%)     | 9 (75%)     |           |
|                  | Visit day 5      | 12 (100%)  | 1 (8.33%)              | 2 (16.67%)        | 9 (75%)       |                     | 12 (100%)   | 3 (25%)     | 9 (75%)     |           |
|                  | Visit day 6      | 12 (100%)  |                        | 4 (33.33%)        | 8 (66.67%)    |                     | 12 (100%)   | 4 (33.33%)  | 8 (66.67%)  |           |
|                  | Visit day 7      | 12 (100%)  |                        | 5 (41.67%)        | 7 (58.33%)    |                     | 12 (100%)   | 5 (41.67%)  | 7 (58.33%)  |           |
|                  | Visit day 8      | 12 (100%)  | 2 (16.67%)             | 5 (41.67%)        | 5 (41.67%)    |                     | 12 (100%)   | 7 (58.33%)  | 5 (41.67%)  |           |

| Treatment | Visit            | Result*   |                        |                   |               | Change from usual** |            |            |   |
|-----------|------------------|-----------|------------------------|-------------------|---------------|---------------------|------------|------------|---|
|           |                  | n         | much better than usual | better than usual | same as usual | worse than usual    | n          | -1         | 0 |
|           | Visit day 9      | 12 (100%) | 3 (25%)                | 4 (33.33%)        | 5 (41.67%)    | 12 (100%)           | 7 (58.33%) | 5 (41.67%) |   |
|           | Visit day 10     | 12 (100%) | 1 (8.33%)              | 6 (50%)           | 5 (41.67%)    | 12 (100%)           | 7 (58.33%) | 5 (41.67%) |   |
|           | Visit day 11     | 12 (100%) | 1 (8.33%)              | 5 (41.67%)        | 6 (50%)       | 12 (100%)           | 6 (50%)    | 6 (50%)    |   |
|           | Visit day 12     | 12 (100%) | 2 (16.67%)             | 4 (33.33%)        | 6 (50%)       | 12 (100%)           | 6 (50%)    | 6 (50%)    |   |
|           | Visit day 13     | 12 (100%) | 3 (25%)                | 4 (33.33%)        | 5 (41.67%)    | 12 (100%)           | 7 (58.33%) | 5 (41.67%) |   |
|           | Follow-up day 15 | 12 (100%) | 3 (25%)                | 6 (50%)           | 3 (25%)       | 12 (100%)           | 9 (75%)    | 3 (25%)    |   |
|           | Follow-up day 45 | 12 (100%) | 1 (8.33%)              | 6 (50%)           | 5 (41.67%)    | 12 (100%)           | 7 (58.33%) | 5 (41.67%) |   |

Executed script: \\SDS-SERVER2\SAS\$\SDS3\Projects\STATISTICS DRUG DEV\NBMI4011 - CTI002\Analyser\Script\SAS\T\_fs003.sas, on: 23MAY2016:14:00, by: maria.lidsell

Version of source data: nbmi\_ph3.sas7bdat, last modified: 24FEB16:23:13, status: Final

\*) Scores are counted according to: much better than usual=0, better than usual=0, same as usual=1, worse than usual=2, much worse than usual=3.

\*\*) Change for physical and mental fatigue score is defined as difference from 1=same as usual.

Table DE7.6.1 Categorical summary of change from usual of Physical and mental fatigue score item - Physical Fatigue Score, have less strength in your muscles (Full analysis set)

| Treatment    | Visit            | Result*     |                        |                   |               | Change from usual** |           |             |             |           |
|--------------|------------------|-------------|------------------------|-------------------|---------------|---------------------|-----------|-------------|-------------|-----------|
|              |                  | n           | much better than usual | better than usual | same as usual | worse than usual    | n         | -1          | 0           | 1         |
| Total (n=36) | Visit day 2      | 36 (100%)   |                        |                   | 36 (100%)     |                     | 36 (100%) | 36 (100%)   |             |           |
|              | Visit day 3      | 36 (100%)   |                        | 3 (8.33%)         | 33 (91.67%)   |                     | 36 (100%) | 3 (8.33%)   | 33 (91.67%) |           |
|              | Visit day 4      | 36 (100%)   | 4 (11.11%)             | 3 (8.33%)         | 29 (80.56%)   |                     | 36 (100%) | 7 (19.44%)  | 29 (80.56%) |           |
|              | Visit day 5      | 36 (100%)   | 5 (13.89%)             | 8 (22.22%)        | 23 (63.89%)   |                     | 36 (100%) | 13 (36.11%) | 23 (63.89%) |           |
|              | Visit day 6      | 36 (100%)   | 5 (13.89%)             | 7 (19.44%)        | 24 (66.67%)   |                     | 36 (100%) | 12 (33.33%) | 24 (66.67%) |           |
|              | Visit day 7      | 36 (100%)   | 3 (8.33%)              | 8 (22.22%)        | 25 (69.44%)   |                     | 36 (100%) | 11 (30.56%) | 25 (69.44%) |           |
|              | Visit day 8      | 36 (100%)   | 5 (13.89%)             | 8 (22.22%)        | 23 (63.89%)   |                     | 36 (100%) | 13 (36.11%) | 23 (63.89%) |           |
|              | Visit day 9      | 36 (100%)   | 4 (11.11%)             | 7 (19.44%)        | 24 (66.67%)   | 1 (2.78%)           | 36 (100%) | 11 (30.56%) | 24 (66.67%) | 1 (2.78%) |
|              | Visit day 10     | 36 (100%)   | 4 (11.11%)             | 13 (36.11%)       | 19 (52.78%)   |                     | 36 (100%) | 17 (47.22%) | 19 (52.78%) |           |
|              | Visit day 11     | 36 (100%)   | 9 (25%)                | 10 (27.78%)       | 17 (47.22%)   |                     | 36 (100%) | 19 (52.78%) | 17 (47.22%) |           |
|              | Visit day 12     | 36 (100%)   | 8 (22.22%)             | 3 (8.33%)         | 25 (69.44%)   |                     | 36 (100%) | 11 (30.56%) | 25 (69.44%) |           |
|              | Visit day 13     | 36 (100%)   | 11 (30.56%)            | 4 (11.11%)        | 21 (58.33%)   |                     | 36 (100%) | 15 (41.67%) | 21 (58.33%) |           |
|              | Follow-up day 15 | 36 (100%)   | 8 (22.22%)             | 9 (25%)           | 19 (52.78%)   |                     | 36 (100%) | 17 (47.22%) | 19 (52.78%) |           |
|              | Follow-up day 45 | 36 (100%)   | 3 (8.33%)              | 16 (44.44%)       | 16 (44.44%)   | 1 (2.78%)           | 36 (100%) | 19 (52.78%) | 16 (44.44%) | 1 (2.78%) |
|              | NBMH100mg (n=13) | Visit day 2 | 13 (100%)              |                   |               | 13 (100%)           |           | 13 (100%)   | 13 (100%)   |           |
| Visit day 3  |                  | 13 (100%)   |                        | 2 (15.38%)        | 11 (84.62%)   |                     | 13 (100%) | 2 (15.38%)  | 11 (84.62%) |           |
| Visit day 4  |                  | 13 (100%)   | 3 (23.08%)             | 1 (7.69%)         | 9 (69.23%)    |                     | 13 (100%) | 4 (30.77%)  | 9 (69.23%)  |           |
| Visit day 5  |                  | 13 (100%)   | 3 (23.08%)             | 3 (23.08%)        | 7 (53.85%)    |                     | 13 (100%) | 6 (46.15%)  | 7 (53.85%)  |           |
| Visit day 6  |                  | 13 (100%)   | 4 (30.77%)             | 2 (15.38%)        | 7 (53.85%)    |                     | 13 (100%) | 6 (46.15%)  | 7 (53.85%)  |           |
| Visit day 7  |                  | 13 (100%)   | 2 (15.38%)             | 2 (15.38%)        | 9 (69.23%)    |                     | 13 (100%) | 4 (30.77%)  | 9 (69.23%)  |           |
| Visit day 8  |                  | 13 (100%)   | 3 (23.08%)             | 3 (23.08%)        | 7 (53.85%)    |                     | 13 (100%) | 6 (46.15%)  | 7 (53.85%)  |           |
| Visit day 9  |                  | 13 (100%)   | 1 (7.69%)              | 5 (38.46%)        | 7 (53.85%)    |                     | 13 (100%) | 6 (46.15%)  | 7 (53.85%)  |           |
| Visit day 10 |                  | 13 (100%)   | 3 (23.08%)             | 3 (23.08%)        | 7 (53.85%)    |                     | 13 (100%) | 6 (46.15%)  | 7 (53.85%)  |           |



| Treatment        | Visit            | Result*    |                        |                   |               | Change from usual** |            |            |             |           |
|------------------|------------------|------------|------------------------|-------------------|---------------|---------------------|------------|------------|-------------|-----------|
|                  |                  | n          | much better than usual | better than usual | same as usual | worse than usual    | n          | -1         | 0           | 1         |
| NBMI300mg (n=11) | Visit day 11     | 13 (100%)  | 4 (30.77%)             | 4 (30.77%)        | 5 (38.46%)    |                     | 13 (100%)  | 8 (61.54%) | 5 (38.46%)  |           |
|                  | Visit day 12     | 13 (100%)  | 5 (38.46%)             | 1 (7.69%)         | 7 (53.85%)    |                     | 13 (100%)  | 6 (46.15%) | 7 (53.85%)  |           |
|                  | Visit day 13     | 13 (100%)  | 5 (38.46%)             | 1 (7.69%)         | 7 (53.85%)    |                     | 13 (100%)  | 6 (46.15%) | 7 (53.85%)  |           |
|                  | Follow-up day 15 | 13 (100%)  | 6 (46.15%)             | 1 (7.69%)         | 6 (46.15%)    |                     | 13 (100%)  | 7 (53.85%) | 6 (46.15%)  |           |
|                  | Follow-up day 45 | 13 (100%)  | 2 (15.38%)             | 7 (53.85%)        | 3 (23.08%)    | 1 (7.69%)           | 13 (100%)  | 9 (69.23%) | 3 (23.08%)  | 1 (7.69%) |
|                  | Visit day 2      | 11 (100%)  |                        |                   | 11 (100%)     |                     | 11 (100%)  |            | 11 (100%)   |           |
|                  | Visit day 3      | 11 (100%)  |                        |                   | 11 (100%)     |                     | 11 (100%)  |            | 11 (100%)   |           |
|                  | Visit day 4      | 11 (100%)  |                        | 1 (9.09%)         | 10 (90.91%)   |                     | 11 (100%)  | 1 (9.09%)  | 10 (90.91%) |           |
|                  | Visit day 5      | 11 (100%)  |                        | 4 (36.36%)        | 7 (63.64%)    |                     | 11 (100%)  | 4 (36.36%) | 7 (63.64%)  |           |
|                  | Visit day 6      | 11 (100%)  |                        | 3 (27.27%)        | 8 (72.73%)    |                     | 11 (100%)  | 3 (27.27%) | 8 (72.73%)  |           |
|                  | Visit day 7      | 11 (100%)  | 1 (9.09%)              | 2 (18.18%)        | 8 (72.73%)    |                     | 11 (100%)  | 3 (27.27%) | 8 (72.73%)  |           |
|                  | Visit day 8      | 11 (100%)  | 1 (9.09%)              | 4 (36.36%)        | 6 (54.55%)    |                     | 11 (100%)  | 5 (45.45%) | 6 (54.55%)  |           |
|                  | Visit day 9      | 11 (100%)  | 1 (9.09%)              | 1 (9.09%)         | 8 (72.73%)    | 1 (9.09%)           | 11 (100%)  | 2 (18.18%) | 8 (72.73%)  | 1 (9.09%) |
|                  | Visit day 10     | 11 (100%)  | 1 (9.09%)              | 5 (45.45%)        | 5 (45.45%)    |                     | 11 (100%)  | 6 (54.55%) | 5 (45.45%)  |           |
|                  | Visit day 11     | 11 (100%)  | 4 (36.36%)             | 3 (27.27%)        | 4 (36.36%)    |                     | 11 (100%)  | 7 (63.64%) | 4 (36.36%)  |           |
| Visit day 12     | 11 (100%)        | 2 (18.18%) | 2 (18.18%)             | 7 (63.64%)        |               | 11 (100%)           | 4 (36.36%) | 7 (63.64%) |             |           |
| Visit day 13     | 11 (100%)        | 4 (36.36%) | 3 (27.27%)             | 4 (36.36%)        |               | 11 (100%)           | 7 (63.64%) | 4 (36.36%) |             |           |
| Follow-up day 15 | 11 (100%)        | 1 (9.09%)  | 5 (45.45%)             | 5 (45.45%)        |               | 11 (100%)           | 6 (54.55%) | 5 (45.45%) |             |           |
| Follow-up day 45 | 11 (100%)        |            | 7 (63.64%)             | 4 (36.36%)        |               | 11 (100%)           | 7 (63.64%) | 4 (36.36%) |             |           |
| Placebo (n=12)   | Visit day 2      | 12 (100%)  |                        |                   | 12 (100%)     |                     | 12 (100%)  |            | 12 (100%)   |           |
|                  | Visit day 3      | 12 (100%)  |                        | 1 (8.33%)         | 11 (91.67%)   |                     | 12 (100%)  | 1 (8.33%)  | 11 (91.67%) |           |
|                  | Visit day 4      | 12 (100%)  | 1 (8.33%)              | 1 (8.33%)         | 10 (83.33%)   |                     | 12 (100%)  | 2 (16.67%) | 10 (83.33%) |           |
|                  | Visit day 5      | 12 (100%)  | 2 (16.67%)             | 1 (8.33%)         | 9 (75%)       |                     | 12 (100%)  | 3 (25%)    | 9 (75%)     |           |
|                  | Visit day 6      | 12 (100%)  | 1 (8.33%)              | 2 (16.67%)        | 9 (75%)       |                     | 12 (100%)  | 3 (25%)    | 9 (75%)     |           |
|                  | Visit day 7      | 12 (100%)  |                        | 4 (33.33%)        | 8 (66.67%)    |                     | 12 (100%)  | 4 (33.33%) | 8 (66.67%)  |           |
|                  | Visit day 8      | 12 (100%)  | 1 (8.33%)              | 1 (8.33%)         | 10 (83.33%)   |                     | 12 (100%)  | 2 (16.67%) | 10 (83.33%) |           |

| Treatment | Visit            | Result*   |                        |                   |               | Change from usual** |            |             |   |
|-----------|------------------|-----------|------------------------|-------------------|---------------|---------------------|------------|-------------|---|
|           |                  | n         | much better than usual | better than usual | same as usual | worse than usual    | n          | -1          | 0 |
|           | Visit day 9      | 12 (100%) | 2 (16.67%)             | 1 (8.33%)         | 9 (75%)       | 12 (100%)           | 3 (25%)    | 9 (75%)     |   |
|           | Visit day 10     | 12 (100%) |                        | 5 (41.67%)        | 7 (58.33%)    | 12 (100%)           | 5 (41.67%) | 7 (58.33%)  |   |
|           | Visit day 11     | 12 (100%) | 1 (8.33%)              | 3 (25%)           | 8 (66.67%)    | 12 (100%)           | 4 (33.33%) | 8 (66.67%)  |   |
|           | Visit day 12     | 12 (100%) | 1 (8.33%)              |                   | 11 (91.67%)   | 12 (100%)           | 1 (8.33%)  | 11 (91.67%) |   |
|           | Visit day 13     | 12 (100%) | 2 (16.67%)             |                   | 10 (83.33%)   | 12 (100%)           | 2 (16.67%) | 10 (83.33%) |   |
|           | Follow-up day 15 | 12 (100%) | 1 (8.33%)              | 3 (25%)           | 8 (66.67%)    | 12 (100%)           | 4 (33.33%) | 8 (66.67%)  |   |
|           | Follow-up day 45 | 12 (100%) | 1 (8.33%)              | 2 (16.67%)        | 9 (75%)       | 12 (100%)           | 3 (25%)    | 9 (75%)     |   |

Executed script: \\SDS-SERVER2\SAS\$\SDS3\Projects\STATISTICS DRUG DEV\NBMI4011 - CTI002\Analyser\Script\SAS\T\_fs003.sas, on: 23MAY2016:14:00, by: maria.lidsell

Version of source data: nbmi\_ph3.sas7bdat, last modified: 24FEB16:23:13, status: Final

\*) Scores are counted according to: much better than usual=0, better than usual=0, same as usual=1, worse than usual=2, much worse than usual=3.

\*\*) Change for physical and mental fatigue score is defined as difference from 1=same as usual.

Table DE7.7.1 Categorical summary of change from usual of Physical and mental fatigue score item - Physical Fatigue Score, feel weak (Full analysis set)

| Treatment    | Visit            | Result*     |                        |                   |               | Change from usual** |           |             |             |           |
|--------------|------------------|-------------|------------------------|-------------------|---------------|---------------------|-----------|-------------|-------------|-----------|
|              |                  | n           | much better than usual | better than usual | same as usual | worse than usual    | n         | -1          | 0           | 1         |
| Total (n=36) | Visit day 2      | 36 (100%)   |                        |                   | 36 (100%)     |                     | 36 (100%) | 36 (100%)   |             |           |
|              | Visit day 3      | 36 (100%)   |                        | 6 (16.67%)        | 30 (83.33%)   |                     | 36 (100%) | 6 (16.67%)  | 30 (83.33%) |           |
|              | Visit day 4      | 36 (100%)   |                        | 5 (13.89%)        | 31 (86.11%)   |                     | 36 (100%) | 5 (13.89%)  | 31 (86.11%) |           |
|              | Visit day 5      | 36 (100%)   | 2 (5.56%)              | 6 (16.67%)        | 28 (77.78%)   |                     | 36 (100%) | 8 (22.22%)  | 28 (77.78%) |           |
|              | Visit day 6      | 36 (100%)   | 2 (5.56%)              | 6 (16.67%)        | 28 (77.78%)   |                     | 36 (100%) | 8 (22.22%)  | 28 (77.78%) |           |
|              | Visit day 7      | 36 (100%)   | 2 (5.56%)              | 11 (30.56%)       | 23 (63.89%)   |                     | 36 (100%) | 13 (36.11%) | 23 (63.89%) |           |
|              | Visit day 8      | 36 (100%)   | 4 (11.11%)             | 15 (41.67%)       | 17 (47.22%)   |                     | 36 (100%) | 19 (52.78%) | 17 (47.22%) |           |
|              | Visit day 9      | 36 (100%)   | 2 (5.56%)              | 12 (33.33%)       | 21 (58.33%)   | 1 (2.78%)           | 36 (100%) | 14 (38.89%) | 21 (58.33%) | 1 (2.78%) |
|              | Visit day 10     | 36 (100%)   | 4 (11.11%)             | 9 (25%)           | 23 (63.89%)   |                     | 36 (100%) | 13 (36.11%) | 23 (63.89%) |           |
|              | Visit day 11     | 36 (100%)   | 5 (13.89%)             | 10 (27.78%)       | 21 (58.33%)   |                     | 36 (100%) | 15 (41.67%) | 21 (58.33%) |           |
|              | Visit day 12     | 36 (100%)   | 4 (11.11%)             | 11 (30.56%)       | 21 (58.33%)   |                     | 36 (100%) | 15 (41.67%) | 21 (58.33%) |           |
|              | Visit day 13     | 36 (100%)   | 9 (25%)                | 10 (27.78%)       | 17 (47.22%)   |                     | 36 (100%) | 19 (52.78%) | 17 (47.22%) |           |
|              | Follow-up day 15 | 36 (100%)   | 3 (8.33%)              | 16 (44.44%)       | 17 (47.22%)   |                     | 36 (100%) | 19 (52.78%) | 17 (47.22%) |           |
|              | Follow-up day 45 | 36 (100%)   | 4 (11.11%)             | 13 (36.11%)       | 19 (52.78%)   |                     | 36 (100%) | 17 (47.22%) | 19 (52.78%) |           |
|              | NBMH100mg (n=13) | Visit day 2 | 13 (100%)              |                   |               | 13 (100%)           |           | 13 (100%)   | 13 (100%)   |           |
| Visit day 3  |                  | 13 (100%)   |                        | 3 (23.08%)        | 10 (76.92%)   |                     | 13 (100%) | 3 (23.08%)  | 10 (76.92%) |           |
| Visit day 4  |                  | 13 (100%)   |                        | 1 (7.69%)         | 12 (92.31%)   |                     | 13 (100%) | 1 (7.69%)   | 12 (92.31%) |           |
| Visit day 5  |                  | 13 (100%)   | 1 (7.69%)              | 2 (15.38%)        | 10 (76.92%)   |                     | 13 (100%) | 3 (23.08%)  | 10 (76.92%) |           |
| Visit day 6  |                  | 13 (100%)   | 2 (15.38%)             | 3 (23.08%)        | 8 (61.54%)    |                     | 13 (100%) | 5 (38.46%)  | 8 (61.54%)  |           |
| Visit day 7  |                  | 13 (100%)   | 1 (7.69%)              | 4 (30.77%)        | 8 (61.54%)    |                     | 13 (100%) | 5 (38.46%)  | 8 (61.54%)  |           |
| Visit day 8  |                  | 13 (100%)   | 3 (23.08%)             | 5 (38.46%)        | 5 (38.46%)    |                     | 13 (100%) | 8 (61.54%)  | 5 (38.46%)  |           |
| Visit day 9  |                  | 13 (100%)   | 1 (7.69%)              | 3 (23.08%)        | 9 (69.23%)    |                     | 13 (100%) | 4 (30.77%)  | 9 (69.23%)  |           |
| Visit day 10 |                  | 13 (100%)   | 3 (23.08%)             | 2 (15.38%)        | 8 (61.54%)    |                     | 13 (100%) | 5 (38.46%)  | 8 (61.54%)  |           |

| Treatment        | Visit            | Result*    |                        |                   |               | Change from usual** |            |            |             |           |
|------------------|------------------|------------|------------------------|-------------------|---------------|---------------------|------------|------------|-------------|-----------|
|                  |                  | n          | much better than usual | better than usual | same as usual | worse than usual    | n          | -1         | 0           | 1         |
| NBM1300mg (n=11) | Visit day 11     | 13 (100%)  | 2 (15.38%)             | 2 (15.38%)        | 9 (69.23%)    |                     | 13 (100%)  | 4 (30.77%) | 9 (69.23%)  |           |
|                  | Visit day 12     | 13 (100%)  | 2 (15.38%)             | 3 (23.08%)        | 8 (61.54%)    |                     | 13 (100%)  | 5 (38.46%) | 8 (61.54%)  |           |
|                  | Visit day 13     | 13 (100%)  | 4 (30.77%)             | 2 (15.38%)        | 7 (53.85%)    |                     | 13 (100%)  | 6 (46.15%) | 7 (53.85%)  |           |
|                  | Follow-up day 15 | 13 (100%)  | 3 (23.08%)             | 6 (46.15%)        | 4 (30.77%)    |                     | 13 (100%)  | 9 (69.23%) | 4 (30.77%)  |           |
|                  | Follow-up day 45 | 13 (100%)  | 2 (15.38%)             | 7 (53.85%)        | 4 (30.77%)    |                     | 13 (100%)  | 9 (69.23%) | 4 (30.77%)  |           |
|                  | Visit day 2      | 11 (100%)  |                        |                   | 11 (100%)     |                     | 11 (100%)  |            | 11 (100%)   |           |
|                  | Visit day 3      | 11 (100%)  |                        | 1 (9.09%)         | 10 (90.91%)   |                     | 11 (100%)  | 1 (9.09%)  | 10 (90.91%) |           |
|                  | Visit day 4      | 11 (100%)  |                        | 3 (27.27%)        | 8 (72.73%)    |                     | 11 (100%)  | 3 (27.27%) | 8 (72.73%)  |           |
|                  | Visit day 5      | 11 (100%)  | 1 (9.09%)              | 1 (9.09%)         | 9 (81.82%)    |                     | 11 (100%)  | 2 (18.18%) | 9 (81.82%)  |           |
|                  | Visit day 6      | 11 (100%)  |                        | 2 (18.18%)        | 9 (81.82%)    |                     | 11 (100%)  | 2 (18.18%) | 9 (81.82%)  |           |
|                  | Visit day 7      | 11 (100%)  | 1 (9.09%)              | 4 (36.36%)        | 6 (54.55%)    |                     | 11 (100%)  | 5 (45.45%) | 6 (54.55%)  |           |
|                  | Visit day 8      | 11 (100%)  | 1 (9.09%)              | 5 (45.45%)        | 5 (45.45%)    |                     | 11 (100%)  | 6 (54.55%) | 5 (45.45%)  |           |
|                  | Visit day 9      | 11 (100%)  |                        | 4 (36.36%)        | 6 (54.55%)    | 1 (9.09%)           | 11 (100%)  | 4 (36.36%) | 6 (54.55%)  | 1 (9.09%) |
|                  | Visit day 10     | 11 (100%)  | 1 (9.09%)              | 4 (36.36%)        | 6 (54.55%)    |                     | 11 (100%)  | 5 (45.45%) | 6 (54.55%)  |           |
|                  | Visit day 11     | 11 (100%)  | 3 (27.27%)             | 4 (36.36%)        | 4 (36.36%)    |                     | 11 (100%)  | 7 (63.64%) | 4 (36.36%)  |           |
| Visit day 12     | 11 (100%)        | 1 (9.09%)  | 4 (36.36%)             | 6 (54.55%)        |               | 11 (100%)           | 5 (45.45%) | 6 (54.55%) |             |           |
| Visit day 13     | 11 (100%)        | 4 (36.36%) | 4 (36.36%)             | 3 (27.27%)        |               | 11 (100%)           | 8 (72.73%) | 3 (27.27%) |             |           |
| Follow-up day 15 | 11 (100%)        |            | 7 (63.64%)             | 4 (36.36%)        |               | 11 (100%)           | 7 (63.64%) | 4 (36.36%) |             |           |
| Follow-up day 45 | 11 (100%)        | 1 (9.09%)  | 5 (45.45%)             | 5 (45.45%)        |               | 11 (100%)           | 6 (54.55%) | 5 (45.45%) |             |           |
| Placebo (n=12)   | Visit day 2      | 12 (100%)  |                        |                   | 12 (100%)     |                     | 12 (100%)  |            | 12 (100%)   |           |
|                  | Visit day 3      | 12 (100%)  |                        | 2 (16.67%)        | 10 (83.33%)   |                     | 12 (100%)  | 2 (16.67%) | 10 (83.33%) |           |
|                  | Visit day 4      | 12 (100%)  |                        | 1 (8.33%)         | 11 (91.67%)   |                     | 12 (100%)  | 1 (8.33%)  | 11 (91.67%) |           |
|                  | Visit day 5      | 12 (100%)  |                        | 3 (25%)           | 9 (75%)       |                     | 12 (100%)  | 3 (25%)    | 9 (75%)     |           |
|                  | Visit day 6      | 12 (100%)  |                        | 1 (8.33%)         | 11 (91.67%)   |                     | 12 (100%)  | 1 (8.33%)  | 11 (91.67%) |           |
|                  | Visit day 7      | 12 (100%)  |                        | 3 (25%)           | 9 (75%)       |                     | 12 (100%)  | 3 (25%)    | 9 (75%)     |           |
|                  | Visit day 8      | 12 (100%)  |                        | 5 (41.67%)        | 7 (58.33%)    |                     | 12 (100%)  | 5 (41.67%) | 7 (58.33%)  |           |

| Treatment | Visit            | Result*   |                        |                   |               | Change from usual** |            |             |   |
|-----------|------------------|-----------|------------------------|-------------------|---------------|---------------------|------------|-------------|---|
|           |                  | n         | much better than usual | better than usual | same as usual | worse than usual    | n          | -1          | 0 |
|           | Visit day 9      | 12 (100%) | 1 (8.33%)              | 5 (41.67%)        | 6 (50%)       | 12 (100%)           | 6 (50%)    | 6 (50%)     |   |
|           | Visit day 10     | 12 (100%) |                        | 3 (25%)           | 9 (75%)       | 12 (100%)           | 3 (25%)    | 9 (75%)     |   |
|           | Visit day 11     | 12 (100%) |                        | 4 (33.33%)        | 8 (66.67%)    | 12 (100%)           | 4 (33.33%) | 8 (66.67%)  |   |
|           | Visit day 12     | 12 (100%) | 1 (8.33%)              | 4 (33.33%)        | 7 (58.33%)    | 12 (100%)           | 5 (41.67%) | 7 (58.33%)  |   |
|           | Visit day 13     | 12 (100%) | 1 (8.33%)              | 4 (33.33%)        | 7 (58.33%)    | 12 (100%)           | 5 (41.67%) | 7 (58.33%)  |   |
|           | Follow-up day 15 | 12 (100%) |                        | 3 (25%)           | 9 (75%)       | 12 (100%)           | 3 (25%)    | 9 (75%)     |   |
|           | Follow-up day 45 | 12 (100%) | 1 (8.33%)              | 1 (8.33%)         | 10 (83.33%)   | 12 (100%)           | 2 (16.67%) | 10 (83.33%) |   |

Executed script: \\SDS-SERVER2\SAS\$\SDS3\Projects\STATISTICS DRUG DEV\NBMI4011 - CTI002\Analyser\Script\SAS\T\_fs003.sas, on: 23MAY2016:14:00, by: maria.lidsell

Version of source data: nbmi\_ph3.sas7bdat, last modified: 24FEB16:23:13, status: Final

\*) Scores are counted according to: much better than usual=0, better than usual=0, same as usual=1, worse than usual=2, much worse than usual=3.

\*\*) Change for physical and mental fatigue score is defined as difference from 1=same as usual.

Table DE7.8.1 Categorical summary of change from usual of Physical and mental fatigue score item - Physical Fatigue Score, start things without difficulties, but get weak as you go on (Full analysis set)

| Treatment        | Visit            | Result*   |                        |                   |               | Change from usual** |           |            |             |           |
|------------------|------------------|-----------|------------------------|-------------------|---------------|---------------------|-----------|------------|-------------|-----------|
|                  |                  | n         | much better than usual | better than usual | same as usual | worse than usual    | n         | -1         | 0           | 1         |
| Total (n=36)     | Visit day 2      | 36 (100%) |                        |                   | 36 (100%)     |                     | 36 (100%) | 36 (100%)  |             |           |
|                  | Visit day 3      | 36 (100%) |                        | 3 (8.33%)         | 33 (91.67%)   |                     | 36 (100%) | 3 (8.33%)  | 33 (91.67%) |           |
|                  | Visit day 4      | 36 (100%) |                        | 2 (5.56%)         | 34 (94.44%)   |                     | 36 (100%) | 2 (5.56%)  | 34 (94.44%) |           |
|                  | Visit day 5      | 36 (100%) |                        | 2 (5.56%)         | 34 (94.44%)   |                     | 36 (100%) | 2 (5.56%)  | 34 (94.44%) |           |
|                  | Visit day 6      | 36 (100%) |                        | 3 (8.33%)         | 33 (91.67%)   |                     | 36 (100%) | 3 (8.33%)  | 33 (91.67%) |           |
|                  | Visit day 7      | 36 (100%) | 1 (2.78%)              | 3 (8.33%)         | 32 (88.89%)   |                     | 36 (100%) | 4 (11.11%) | 32 (88.89%) |           |
|                  | Visit day 8      | 36 (100%) |                        | 3 (8.33%)         | 33 (91.67%)   |                     | 36 (100%) | 3 (8.33%)  | 33 (91.67%) |           |
|                  | Visit day 9      | 36 (100%) |                        | 1 (2.78%)         | 35 (97.22%)   |                     | 36 (100%) | 1 (2.78%)  | 35 (97.22%) |           |
|                  | Visit day 10     | 36 (100%) |                        | 3 (8.33%)         | 33 (91.67%)   |                     | 36 (100%) | 3 (8.33%)  | 33 (91.67%) |           |
|                  | Visit day 11     | 36 (100%) |                        | 1 (2.78%)         | 35 (97.22%)   |                     | 36 (100%) | 1 (2.78%)  | 35 (97.22%) |           |
|                  | Visit day 12     | 36 (100%) | 1 (2.78%)              | 1 (2.78%)         | 34 (94.44%)   |                     | 36 (100%) | 2 (5.56%)  | 34 (94.44%) |           |
|                  | Visit day 13     | 36 (100%) | 5 (13.89%)             | 3 (8.33%)         | 28 (77.78%)   |                     | 36 (100%) | 8 (22.22%) | 28 (77.78%) |           |
|                  | Follow-up day 15 | 36 (100%) | 2 (5.56%)              | 5 (13.89%)        | 28 (77.78%)   | 1 (2.78%)           | 36 (100%) | 7 (19.44%) | 28 (77.78%) | 1 (2.78%) |
|                  | Follow-up day 45 | 36 (100%) | 1 (2.78%)              | 8 (22.22%)        | 26 (72.22%)   | 1 (2.78%)           | 36 (100%) | 9 (25%)    | 26 (72.22%) | 1 (2.78%) |
| NBMH100mg (n=13) | Visit day 2      | 13 (100%) |                        |                   | 13 (100%)     |                     | 13 (100%) | 13 (100%)  |             |           |
|                  | Visit day 3      | 13 (100%) |                        | 1 (7.69%)         | 12 (92.31%)   |                     | 13 (100%) | 1 (7.69%)  | 12 (92.31%) |           |
|                  | Visit day 4      | 13 (100%) |                        |                   | 13 (100%)     |                     | 13 (100%) | 13 (100%)  |             |           |
|                  | Visit day 5      | 13 (100%) |                        | 1 (7.69%)         | 12 (92.31%)   |                     | 13 (100%) | 1 (7.69%)  | 12 (92.31%) |           |
|                  | Visit day 6      | 13 (100%) |                        | 2 (15.38%)        | 11 (84.62%)   |                     | 13 (100%) | 2 (15.38%) | 11 (84.62%) |           |
|                  | Visit day 7      | 13 (100%) |                        | 2 (15.38%)        | 11 (84.62%)   |                     | 13 (100%) | 2 (15.38%) | 11 (84.62%) |           |
|                  | Visit day 8      | 13 (100%) |                        | 2 (15.38%)        | 11 (84.62%)   |                     | 13 (100%) | 2 (15.38%) | 11 (84.62%) |           |
|                  | Visit day 9      | 13 (100%) |                        |                   | 13 (100%)     |                     | 13 (100%) | 13 (100%)  |             |           |
|                  | Visit day 10     | 13 (100%) |                        | 2 (15.38%)        | 11 (84.62%)   |                     | 13 (100%) | 2 (15.38%) | 11 (84.62%) |           |

| Treatment        | Visit            | Result*    |                        |                   |               |                  | Change from usual** |             |             |           |
|------------------|------------------|------------|------------------------|-------------------|---------------|------------------|---------------------|-------------|-------------|-----------|
|                  |                  | n          | much better than usual | better than usual | same as usual | worse than usual | n                   | -1          | 0           | 1         |
| NBMI300mg (n=11) | Visit day 11     | 13 (100%)  |                        |                   | 13 (100%)     |                  | 13 (100%)           |             | 13 (100%)   |           |
|                  | Visit day 12     | 13 (100%)  |                        |                   | 13 (100%)     |                  | 13 (100%)           |             | 13 (100%)   |           |
|                  | Visit day 13     | 13 (100%)  | 2 (15.38%)             |                   | 11 (84.62%)   |                  | 13 (100%)           | 2 (15.38%)  | 11 (84.62%) |           |
|                  | Follow-up day 15 | 13 (100%)  | 2 (15.38%)             | 1 (7.69%)         | 10 (76.92%)   |                  | 13 (100%)           | 3 (23.08%)  | 10 (76.92%) |           |
|                  | Follow-up day 45 | 13 (100%)  | 1 (7.69%)              | 4 (30.77%)        | 7 (53.85%)    | 1 (7.69%)        | 13 (100%)           | 5 (38.46%)  | 7 (53.85%)  | 1 (7.69%) |
|                  | Visit day 2      | 11 (100%)  |                        |                   | 11 (100%)     |                  | 11 (100%)           |             | 11 (100%)   |           |
|                  | Visit day 3      | 11 (100%)  |                        |                   | 11 (100%)     |                  | 11 (100%)           |             | 11 (100%)   |           |
|                  | Visit day 4      | 11 (100%)  |                        | 2 (18.18%)        | 9 (81.82%)    |                  | 11 (100%)           | 2 (18.18%)  | 9 (81.82%)  |           |
|                  | Visit day 5      | 11 (100%)  |                        |                   | 11 (100%)     |                  | 11 (100%)           |             | 11 (100%)   |           |
|                  | Visit day 6      | 11 (100%)  |                        | 1 (9.09%)         | 10 (90.91%)   |                  | 11 (100%)           | 1 (9.09%)   | 10 (90.91%) |           |
|                  | Visit day 7      | 11 (100%)  | 1 (9.09%)              |                   | 10 (90.91%)   |                  | 11 (100%)           | 1 (9.09%)   | 10 (90.91%) |           |
|                  | Visit day 8      | 11 (100%)  |                        |                   | 11 (100%)     |                  | 11 (100%)           |             | 11 (100%)   |           |
|                  | Visit day 9      | 11 (100%)  |                        | 1 (9.09%)         | 10 (90.91%)   |                  | 11 (100%)           | 1 (9.09%)   | 10 (90.91%) |           |
|                  | Visit day 10     | 11 (100%)  |                        |                   | 11 (100%)     |                  | 11 (100%)           |             | 11 (100%)   |           |
|                  | Visit day 11     | 11 (100%)  |                        | 1 (9.09%)         | 10 (90.91%)   |                  | 11 (100%)           | 1 (9.09%)   | 10 (90.91%) |           |
| Visit day 12     | 11 (100%)        | 1 (9.09%)  |                        | 10 (90.91%)       |               | 11 (100%)        | 1 (9.09%)           | 10 (90.91%) |             |           |
| Visit day 13     | 11 (100%)        | 2 (18.18%) | 2 (18.18%)             | 7 (63.64%)        |               | 11 (100%)        | 4 (36.36%)          | 7 (63.64%)  |             |           |
| Follow-up day 15 | 11 (100%)        |            | 3 (27.27%)             | 8 (72.73%)        |               | 11 (100%)        | 3 (27.27%)          | 8 (72.73%)  |             |           |
| Follow-up day 45 | 11 (100%)        |            | 3 (27.27%)             | 8 (72.73%)        |               | 11 (100%)        | 3 (27.27%)          | 8 (72.73%)  |             |           |
| Placebo (n=12)   | Visit day 2      | 12 (100%)  |                        |                   | 12 (100%)     |                  | 12 (100%)           |             | 12 (100%)   |           |
|                  | Visit day 3      | 12 (100%)  |                        | 2 (16.67%)        | 10 (83.33%)   |                  | 12 (100%)           | 2 (16.67%)  | 10 (83.33%) |           |
|                  | Visit day 4      | 12 (100%)  |                        |                   | 12 (100%)     |                  | 12 (100%)           |             | 12 (100%)   |           |
|                  | Visit day 5      | 12 (100%)  |                        | 1 (8.33%)         | 11 (91.67%)   |                  | 12 (100%)           | 1 (8.33%)   | 11 (91.67%) |           |
|                  | Visit day 6      | 12 (100%)  |                        |                   | 12 (100%)     |                  | 12 (100%)           |             | 12 (100%)   |           |
|                  | Visit day 7      | 12 (100%)  |                        | 1 (8.33%)         | 11 (91.67%)   |                  | 12 (100%)           | 1 (8.33%)   | 11 (91.67%) |           |
|                  | Visit day 8      | 12 (100%)  |                        | 1 (8.33%)         | 11 (91.67%)   |                  | 12 (100%)           | 1 (8.33%)   | 11 (91.67%) |           |

| Treatment | Visit            | Result*   |                        |                   |               | Change from usual** |           |            |             |           |
|-----------|------------------|-----------|------------------------|-------------------|---------------|---------------------|-----------|------------|-------------|-----------|
|           |                  | n         | much better than usual | better than usual | same as usual | worse than usual    | n         | -1         | 0           | 1         |
|           | Visit day 9      | 12 (100%) |                        |                   | 12 (100%)     |                     | 12 (100%) |            | 12 (100%)   |           |
|           | Visit day 10     | 12 (100%) |                        | 1 (8.33%)         | 11 (91.67%)   |                     | 12 (100%) | 1 (8.33%)  | 11 (91.67%) |           |
|           | Visit day 11     | 12 (100%) |                        |                   | 12 (100%)     |                     | 12 (100%) |            | 12 (100%)   |           |
|           | Visit day 12     | 12 (100%) |                        | 1 (8.33%)         | 11 (91.67%)   |                     | 12 (100%) | 1 (8.33%)  | 11 (91.67%) |           |
|           | Visit day 13     | 12 (100%) | 1 (8.33%)              | 1 (8.33%)         | 10 (83.33%)   |                     | 12 (100%) | 2 (16.67%) | 10 (83.33%) |           |
|           | Follow-up day 15 | 12 (100%) |                        | 1 (8.33%)         | 10 (83.33%)   | 1 (8.33%)           | 12 (100%) | 1 (8.33%)  | 10 (83.33%) | 1 (8.33%) |
|           | Follow-up day 45 | 12 (100%) |                        | 1 (8.33%)         | 11 (91.67%)   |                     | 12 (100%) | 1 (8.33%)  | 11 (91.67%) |           |

Executed script: \\SDS-SERVER2\SAS\$\SDS3\Projects\STATISTICS DRUG DEV\NBMI4011 - CTI002\Analyser\Script\SAS\T\_fs003.sas, on: 23MAY2016:14:00, by: maria.lidsell

Version of source data: nbmi\_ph3.sas7bdat, last modified: 24FEB16:23:13, status: Final

\*) Scores are counted according to: much better than usual=0, better than usual=0, same as usual=1, worse than usual=2, much worse than usual=3.

\*\*) Change for physical and mental fatigue score is defined as difference from 1=same as usual.



Table DE7.9.1 Categorical summary of change from usual of Physical and mental fatigue score item - Mental Fatigue Score, problems concentrating (Full analysis set)

| Treatment        | Visit            | Result*   |                        |                   | Change from usual** |                  |           |             |             |   |
|------------------|------------------|-----------|------------------------|-------------------|---------------------|------------------|-----------|-------------|-------------|---|
|                  |                  | n         | much better than usual | better than usual | same as usual       | worse than usual | n         | -1          | 0           | 1 |
| Total (n=36)     | Visit day 2      | 36 (100%) |                        |                   | 36 (100%)           |                  | 36 (100%) |             | 36 (100%)   |   |
|                  | Visit day 3      | 36 (100%) |                        | 7 (19.44%)        | 29 (80.56%)         |                  | 36 (100%) | 7 (19.44%)  | 29 (80.56%) |   |
|                  | Visit day 4      | 36 (100%) |                        | 5 (13.89%)        | 31 (86.11%)         |                  | 36 (100%) | 5 (13.89%)  | 31 (86.11%) |   |
|                  | Visit day 5      | 36 (100%) | 1 (2.78%)              | 5 (13.89%)        | 30 (83.33%)         |                  | 36 (100%) | 6 (16.67%)  | 30 (83.33%) |   |
|                  | Visit day 6      | 36 (100%) |                        | 8 (22.22%)        | 28 (77.78%)         |                  | 36 (100%) | 8 (22.22%)  | 28 (77.78%) |   |
|                  | Visit day 7      | 36 (100%) | 1 (2.78%)              | 10 (27.78%)       | 25 (69.44%)         |                  | 36 (100%) | 11 (30.56%) | 25 (69.44%) |   |
|                  | Visit day 8      | 36 (100%) | 2 (5.56%)              | 13 (36.11%)       | 21 (58.33%)         |                  | 36 (100%) | 15 (41.67%) | 21 (58.33%) |   |
|                  | Visit day 9      | 36 (100%) |                        | 11 (30.56%)       | 25 (69.44%)         |                  | 36 (100%) | 11 (30.56%) | 25 (69.44%) |   |
|                  | Visit day 10     | 36 (100%) | 2 (5.56%)              | 6 (16.67%)        | 28 (77.78%)         |                  | 36 (100%) | 8 (22.22%)  | 28 (77.78%) |   |
|                  | Visit day 11     | 36 (100%) | 2 (5.56%)              | 8 (22.22%)        | 26 (72.22%)         |                  | 36 (100%) | 10 (27.78%) | 26 (72.22%) |   |
|                  | Visit day 12     | 36 (100%) | 1 (2.78%)              | 9 (25%)           | 26 (72.22%)         |                  | 36 (100%) | 10 (27.78%) | 26 (72.22%) |   |
|                  | Visit day 13     | 36 (100%) | 5 (13.89%)             | 7 (19.44%)        | 24 (66.67%)         |                  | 36 (100%) | 12 (33.33%) | 24 (66.67%) |   |
|                  | Follow-up day 15 | 36 (100%) | 3 (8.33%)              | 13 (36.11%)       | 20 (55.56%)         |                  | 36 (100%) | 16 (44.44%) | 20 (55.56%) |   |
|                  | Follow-up day 45 | 36 (100%) | 3 (8.33%)              | 13 (36.11%)       | 20 (55.56%)         |                  | 36 (100%) | 16 (44.44%) | 20 (55.56%) |   |
| NBMH100mg (n=13) | Visit day 2      | 13 (100%) |                        |                   | 13 (100%)           |                  | 13 (100%) |             | 13 (100%)   |   |
|                  | Visit day 3      | 13 (100%) |                        | 4 (30.77%)        | 9 (69.23%)          |                  | 13 (100%) | 4 (30.77%)  | 9 (69.23%)  |   |
|                  | Visit day 4      | 13 (100%) |                        | 1 (7.69%)         | 12 (92.31%)         |                  | 13 (100%) | 1 (7.69%)   | 12 (92.31%) |   |
|                  | Visit day 5      | 13 (100%) |                        | 3 (23.08%)        | 10 (76.92%)         |                  | 13 (100%) | 3 (23.08%)  | 10 (76.92%) |   |
|                  | Visit day 6      | 13 (100%) |                        | 4 (30.77%)        | 9 (69.23%)          |                  | 13 (100%) | 4 (30.77%)  | 9 (69.23%)  |   |
|                  | Visit day 7      | 13 (100%) |                        | 3 (23.08%)        | 10 (76.92%)         |                  | 13 (100%) | 3 (23.08%)  | 10 (76.92%) |   |
|                  | Visit day 8      | 13 (100%) |                        | 5 (38.46%)        | 8 (61.54%)          |                  | 13 (100%) | 5 (38.46%)  | 8 (61.54%)  |   |
|                  | Visit day 9      | 13 (100%) |                        | 2 (15.38%)        | 11 (84.62%)         |                  | 13 (100%) | 2 (15.38%)  | 11 (84.62%) |   |
|                  | Visit day 10     | 13 (100%) | 1 (7.69%)              | 1 (7.69%)         | 11 (84.62%)         |                  | 13 (100%) | 2 (15.38%)  | 11 (84.62%) |   |

| Treatment        | Visit            | Result*   |                        |                   |               | Change from usual** |            |            |             |   |
|------------------|------------------|-----------|------------------------|-------------------|---------------|---------------------|------------|------------|-------------|---|
|                  |                  | n         | much better than usual | better than usual | same as usual | worse than usual    | n          | -1         | 0           | 1 |
| NBMI300mg (n=11) | Visit day 11     | 13 (100%) |                        | 3 (23.08%)        | 10 (76.92%)   |                     | 13 (100%)  | 3 (23.08%) | 10 (76.92%) |   |
|                  | Visit day 12     | 13 (100%) |                        | 2 (15.38%)        | 11 (84.62%)   |                     | 13 (100%)  | 2 (15.38%) | 11 (84.62%) |   |
|                  | Visit day 13     | 13 (100%) | 2 (15.38%)             | 1 (7.69%)         | 10 (76.92%)   |                     | 13 (100%)  | 3 (23.08%) | 10 (76.92%) |   |
|                  | Follow-up day 15 | 13 (100%) | 3 (23.08%)             | 3 (23.08%)        | 7 (53.85%)    |                     | 13 (100%)  | 6 (46.15%) | 7 (53.85%)  |   |
|                  | Follow-up day 45 | 13 (100%) | 1 (7.69%)              | 4 (30.77%)        | 8 (61.54%)    |                     | 13 (100%)  | 5 (38.46%) | 8 (61.54%)  |   |
|                  | Visit day 2      | 11 (100%) |                        |                   | 11 (100%)     |                     | 11 (100%)  |            | 11 (100%)   |   |
|                  | Visit day 3      | 11 (100%) |                        | 1 (9.09%)         | 10 (90.91%)   |                     | 11 (100%)  | 1 (9.09%)  | 10 (90.91%) |   |
|                  | Visit day 4      | 11 (100%) |                        | 2 (18.18%)        | 9 (81.82%)    |                     | 11 (100%)  | 2 (18.18%) | 9 (81.82%)  |   |
|                  | Visit day 5      | 11 (100%) | 1 (9.09%)              |                   | 10 (90.91%)   |                     | 11 (100%)  | 1 (9.09%)  | 10 (90.91%) |   |
|                  | Visit day 6      | 11 (100%) |                        | 1 (9.09%)         | 10 (90.91%)   |                     | 11 (100%)  | 1 (9.09%)  | 10 (90.91%) |   |
|                  | Visit day 7      | 11 (100%) | 1 (9.09%)              | 2 (18.18%)        | 8 (72.73%)    |                     | 11 (100%)  | 3 (27.27%) | 8 (72.73%)  |   |
|                  | Visit day 8      | 11 (100%) |                        | 6 (54.55%)        | 5 (45.45%)    |                     | 11 (100%)  | 6 (54.55%) | 5 (45.45%)  |   |
|                  | Visit day 9      | 11 (100%) |                        | 6 (54.55%)        | 5 (45.45%)    |                     | 11 (100%)  | 6 (54.55%) | 5 (45.45%)  |   |
|                  | Visit day 10     | 11 (100%) | 1 (9.09%)              | 2 (18.18%)        | 8 (72.73%)    |                     | 11 (100%)  | 3 (27.27%) | 8 (72.73%)  |   |
|                  | Visit day 11     | 11 (100%) | 2 (18.18%)             | 2 (18.18%)        | 7 (63.64%)    |                     | 11 (100%)  | 4 (36.36%) | 7 (63.64%)  |   |
|                  | Visit day 12     | 11 (100%) | 1 (9.09%)              | 3 (27.27%)        | 7 (63.64%)    |                     | 11 (100%)  | 4 (36.36%) | 7 (63.64%)  |   |
|                  | Visit day 13     | 11 (100%) | 2 (18.18%)             | 3 (27.27%)        | 6 (54.55%)    |                     | 11 (100%)  | 5 (45.45%) | 6 (54.55%)  |   |
| Follow-up day 15 | 11 (100%)        |           | 7 (63.64%)             | 4 (36.36%)        |               | 11 (100%)           | 7 (63.64%) | 4 (36.36%) |             |   |
| Follow-up day 45 | 11 (100%)        | 1 (9.09%) | 7 (63.64%)             | 3 (27.27%)        |               | 11 (100%)           | 8 (72.73%) | 3 (27.27%) |             |   |
| Placebo (n=12)   | Visit day 2      | 12 (100%) |                        |                   | 12 (100%)     |                     | 12 (100%)  |            | 12 (100%)   |   |
|                  | Visit day 3      | 12 (100%) |                        | 2 (16.67%)        | 10 (83.33%)   |                     | 12 (100%)  | 2 (16.67%) | 10 (83.33%) |   |
|                  | Visit day 4      | 12 (100%) |                        | 2 (16.67%)        | 10 (83.33%)   |                     | 12 (100%)  | 2 (16.67%) | 10 (83.33%) |   |
|                  | Visit day 5      | 12 (100%) |                        | 2 (16.67%)        | 10 (83.33%)   |                     | 12 (100%)  | 2 (16.67%) | 10 (83.33%) |   |
|                  | Visit day 6      | 12 (100%) |                        | 3 (25%)           | 9 (75%)       |                     | 12 (100%)  | 3 (25%)    | 9 (75%)     |   |
|                  | Visit day 7      | 12 (100%) |                        | 5 (41.67%)        | 7 (58.33%)    |                     | 12 (100%)  | 5 (41.67%) | 7 (58.33%)  |   |
|                  | Visit day 8      | 12 (100%) | 2 (16.67%)             | 2 (16.67%)        | 8 (66.67%)    |                     | 12 (100%)  | 4 (33.33%) | 8 (66.67%)  |   |

| Treatment | Visit            | Result*   |                        |                   |               | Change from usual** |            |            |   |
|-----------|------------------|-----------|------------------------|-------------------|---------------|---------------------|------------|------------|---|
|           |                  | n         | much better than usual | better than usual | same as usual | worse than usual    | n          | -1         | 0 |
|           | Visit day 9      | 12 (100%) |                        | 3 (25%)           | 9 (75%)       | 12 (100%)           | 3 (25%)    | 9 (75%)    |   |
|           | Visit day 10     | 12 (100%) |                        | 3 (25%)           | 9 (75%)       | 12 (100%)           | 3 (25%)    | 9 (75%)    |   |
|           | Visit day 11     | 12 (100%) |                        | 3 (25%)           | 9 (75%)       | 12 (100%)           | 3 (25%)    | 9 (75%)    |   |
|           | Visit day 12     | 12 (100%) |                        | 4 (33.33%)        | 8 (66.67%)    | 12 (100%)           | 4 (33.33%) | 8 (66.67%) |   |
|           | Visit day 13     | 12 (100%) | 1 (8.33%)              | 3 (25%)           | 8 (66.67%)    | 12 (100%)           | 4 (33.33%) | 8 (66.67%) |   |
|           | Follow-up day 15 | 12 (100%) |                        | 3 (25%)           | 9 (75%)       | 12 (100%)           | 3 (25%)    | 9 (75%)    |   |
|           | Follow-up day 45 | 12 (100%) | 1 (8.33%)              | 2 (16.67%)        | 9 (75%)       | 12 (100%)           | 3 (25%)    | 9 (75%)    |   |

Executed script: \\SDS-SERVER2\SAS\$\SDS3\Projects\STATISTICS DRUG DEV\NBMI4011 - CTI002\Analyser\Script\SAS\T\_fs003.sas, on: 23MAY2016:14:00, by: maria.lidsell

Version of source data: nbmi\_ph3.sas7bdat, last modified: 24FEB16:23:13, status: Final

\*) Scores are counted according to: much better than usual=0, better than usual=0, same as usual=1, worse than usual=2, much worse than usual=3.

\*\*) Change for physical and mental fatigue score is defined as difference from 1=same as usual.

Table DE7.10.1 Categorical summary of change from usual of Physical and mental fatigue score item - Mental Fatigue Score, problems thinking clearly (Full analysis set)

| Treatment        | Visit            | Result*   |                        |                   | Change from usual** |                  |           |             |             |   |
|------------------|------------------|-----------|------------------------|-------------------|---------------------|------------------|-----------|-------------|-------------|---|
|                  |                  | n         | much better than usual | better than usual | same as usual       | worse than usual | n         | -1          | 0           | 1 |
| Total (n=36)     | Visit day 2      | 36 (100%) |                        |                   | 36 (100%)           |                  | 36 (100%) |             | 36 (100%)   |   |
|                  | Visit day 3      | 36 (100%) |                        | 4 (11.11%)        | 32 (88.89%)         |                  | 36 (100%) | 4 (11.11%)  | 32 (88.89%) |   |
|                  | Visit day 4      | 36 (100%) |                        | 3 (8.33%)         | 33 (91.67%)         |                  | 36 (100%) | 3 (8.33%)   | 33 (91.67%) |   |
|                  | Visit day 5      | 36 (100%) |                        | 3 (8.33%)         | 33 (91.67%)         |                  | 36 (100%) | 3 (8.33%)   | 33 (91.67%) |   |
|                  | Visit day 6      | 36 (100%) |                        | 3 (8.33%)         | 33 (91.67%)         |                  | 36 (100%) | 3 (8.33%)   | 33 (91.67%) |   |
|                  | Visit day 7      | 36 (100%) | 1 (2.78%)              | 5 (13.89%)        | 30 (83.33%)         |                  | 36 (100%) | 6 (16.67%)  | 30 (83.33%) |   |
|                  | Visit day 8      | 36 (100%) | 2 (5.56%)              | 6 (16.67%)        | 28 (77.78%)         |                  | 36 (100%) | 8 (22.22%)  | 28 (77.78%) |   |
|                  | Visit day 9      | 36 (100%) |                        | 10 (27.78%)       | 26 (72.22%)         |                  | 36 (100%) | 10 (27.78%) | 26 (72.22%) |   |
|                  | Visit day 10     | 36 (100%) |                        | 4 (11.11%)        | 32 (88.89%)         |                  | 36 (100%) | 4 (11.11%)  | 32 (88.89%) |   |
|                  | Visit day 11     | 36 (100%) | 1 (2.78%)              | 2 (5.56%)         | 33 (91.67%)         |                  | 36 (100%) | 3 (8.33%)   | 33 (91.67%) |   |
|                  | Visit day 12     | 36 (100%) | 1 (2.78%)              | 6 (16.67%)        | 29 (80.56%)         |                  | 36 (100%) | 7 (19.44%)  | 29 (80.56%) |   |
|                  | Visit day 13     | 36 (100%) | 5 (13.89%)             | 5 (13.89%)        | 26 (72.22%)         |                  | 36 (100%) | 10 (27.78%) | 26 (72.22%) |   |
|                  | Follow-up day 15 | 36 (100%) | 3 (8.33%)              | 10 (27.78%)       | 23 (63.89%)         |                  | 36 (100%) | 13 (36.11%) | 23 (63.89%) |   |
|                  | Follow-up day 45 | 36 (100%) | 4 (11.11%)             | 8 (22.22%)        | 24 (66.67%)         |                  | 36 (100%) | 12 (33.33%) | 24 (66.67%) |   |
| NBMH100mg (n=13) | Visit day 2      | 13 (100%) |                        |                   | 13 (100%)           |                  | 13 (100%) |             | 13 (100%)   |   |
|                  | Visit day 3      | 13 (100%) |                        | 2 (15.38%)        | 11 (84.62%)         |                  | 13 (100%) | 2 (15.38%)  | 11 (84.62%) |   |
|                  | Visit day 4      | 13 (100%) |                        |                   | 13 (100%)           |                  | 13 (100%) |             | 13 (100%)   |   |
|                  | Visit day 5      | 13 (100%) |                        | 2 (15.38%)        | 11 (84.62%)         |                  | 13 (100%) | 2 (15.38%)  | 11 (84.62%) |   |
|                  | Visit day 6      | 13 (100%) |                        | 2 (15.38%)        | 11 (84.62%)         |                  | 13 (100%) | 2 (15.38%)  | 11 (84.62%) |   |
|                  | Visit day 7      | 13 (100%) |                        | 2 (15.38%)        | 11 (84.62%)         |                  | 13 (100%) | 2 (15.38%)  | 11 (84.62%) |   |
|                  | Visit day 8      | 13 (100%) |                        | 2 (15.38%)        | 11 (84.62%)         |                  | 13 (100%) | 2 (15.38%)  | 11 (84.62%) |   |
|                  | Visit day 9      | 13 (100%) |                        | 3 (23.08%)        | 10 (76.92%)         |                  | 13 (100%) | 3 (23.08%)  | 10 (76.92%) |   |
|                  | Visit day 10     | 13 (100%) |                        | 2 (15.38%)        | 11 (84.62%)         |                  | 13 (100%) | 2 (15.38%)  | 11 (84.62%) |   |

| Treatment        | Visit            | Result*    |                        |                   |               | Change from usual** |            |            |             |   |
|------------------|------------------|------------|------------------------|-------------------|---------------|---------------------|------------|------------|-------------|---|
|                  |                  | n          | much better than usual | better than usual | same as usual | worse than usual    | n          | -1         | 0           | 1 |
| NBMI300mg (n=11) | Visit day 11     | 13 (100%)  |                        |                   | 13 (100%)     |                     | 13 (100%)  |            | 13 (100%)   |   |
|                  | Visit day 12     | 13 (100%)  |                        | 1 (7.69%)         | 12 (92.31%)   |                     | 13 (100%)  | 1 (7.69%)  | 12 (92.31%) |   |
|                  | Visit day 13     | 13 (100%)  | 2 (15.38%)             |                   | 11 (84.62%)   |                     | 13 (100%)  | 2 (15.38%) | 11 (84.62%) |   |
|                  | Follow-up day 15 | 13 (100%)  | 2 (15.38%)             | 3 (23.08%)        | 8 (61.54%)    |                     | 13 (100%)  | 5 (38.46%) | 8 (61.54%)  |   |
|                  | Follow-up day 45 | 13 (100%)  | 1 (7.69%)              | 2 (15.38%)        | 10 (76.92%)   |                     | 13 (100%)  | 3 (23.08%) | 10 (76.92%) |   |
|                  | Visit day 2      | 11 (100%)  |                        |                   | 11 (100%)     |                     | 11 (100%)  |            | 11 (100%)   |   |
|                  | Visit day 3      | 11 (100%)  |                        | 1 (9.09%)         | 10 (90.91%)   |                     | 11 (100%)  | 1 (9.09%)  | 10 (90.91%) |   |
|                  | Visit day 4      | 11 (100%)  |                        | 2 (18.18%)        | 9 (81.82%)    |                     | 11 (100%)  | 2 (18.18%) | 9 (81.82%)  |   |
|                  | Visit day 5      | 11 (100%)  |                        |                   | 11 (100%)     |                     | 11 (100%)  |            | 11 (100%)   |   |
|                  | Visit day 6      | 11 (100%)  |                        | 1 (9.09%)         | 10 (90.91%)   |                     | 11 (100%)  | 1 (9.09%)  | 10 (90.91%) |   |
|                  | Visit day 7      | 11 (100%)  | 1 (9.09%)              | 1 (9.09%)         | 9 (81.82%)    |                     | 11 (100%)  | 2 (18.18%) | 9 (81.82%)  |   |
|                  | Visit day 8      | 11 (100%)  |                        | 3 (27.27%)        | 8 (72.73%)    |                     | 11 (100%)  | 3 (27.27%) | 8 (72.73%)  |   |
|                  | Visit day 9      | 11 (100%)  |                        | 4 (36.36%)        | 7 (63.64%)    |                     | 11 (100%)  | 4 (36.36%) | 7 (63.64%)  |   |
|                  | Visit day 10     | 11 (100%)  |                        | 1 (9.09%)         | 10 (90.91%)   |                     | 11 (100%)  | 1 (9.09%)  | 10 (90.91%) |   |
|                  | Visit day 11     | 11 (100%)  | 1 (9.09%)              | 1 (9.09%)         | 9 (81.82%)    |                     | 11 (100%)  | 2 (18.18%) | 9 (81.82%)  |   |
|                  | Visit day 12     | 11 (100%)  | 1 (9.09%)              | 2 (18.18%)        | 8 (72.73%)    |                     | 11 (100%)  | 3 (27.27%) | 8 (72.73%)  |   |
| Visit day 13     | 11 (100%)        | 2 (18.18%) | 3 (27.27%)             | 6 (54.55%)        |               | 11 (100%)           | 5 (45.45%) | 6 (54.55%) |             |   |
| Follow-up day 15 | 11 (100%)        | 1 (9.09%)  | 4 (36.36%)             | 6 (54.55%)        |               | 11 (100%)           | 5 (45.45%) | 6 (54.55%) |             |   |
| Follow-up day 45 | 11 (100%)        | 2 (18.18%) | 3 (27.27%)             | 6 (54.55%)        |               | 11 (100%)           | 5 (45.45%) | 6 (54.55%) |             |   |
| Placebo (n=12)   | Visit day 2      | 12 (100%)  |                        |                   | 12 (100%)     |                     | 12 (100%)  |            | 12 (100%)   |   |
|                  | Visit day 3      | 12 (100%)  |                        | 1 (8.33%)         | 11 (91.67%)   |                     | 12 (100%)  | 1 (8.33%)  | 11 (91.67%) |   |
|                  | Visit day 4      | 12 (100%)  |                        | 1 (8.33%)         | 11 (91.67%)   |                     | 12 (100%)  | 1 (8.33%)  | 11 (91.67%) |   |
|                  | Visit day 5      | 12 (100%)  |                        | 1 (8.33%)         | 11 (91.67%)   |                     | 12 (100%)  | 1 (8.33%)  | 11 (91.67%) |   |
|                  | Visit day 6      | 12 (100%)  |                        |                   | 12 (100%)     |                     | 12 (100%)  |            | 12 (100%)   |   |
|                  | Visit day 7      | 12 (100%)  |                        | 2 (16.67%)        | 10 (83.33%)   |                     | 12 (100%)  | 2 (16.67%) | 10 (83.33%) |   |
|                  | Visit day 8      | 12 (100%)  | 2 (16.67%)             | 1 (8.33%)         | 9 (75%)       |                     | 12 (100%)  | 3 (25%)    | 9 (75%)     |   |

| Treatment | Visit            | Result*   |                        |                   |               | Change from usual** |            |             |   |
|-----------|------------------|-----------|------------------------|-------------------|---------------|---------------------|------------|-------------|---|
|           |                  | n         | much better than usual | better than usual | same as usual | worse than usual    | n          | -1          | 0 |
|           | Visit day 9      | 12 (100%) |                        | 3 (25%)           | 9 (75%)       | 12 (100%)           | 3 (25%)    | 9 (75%)     |   |
|           | Visit day 10     | 12 (100%) |                        | 1 (8.33%)         | 11 (91.67%)   | 12 (100%)           | 1 (8.33%)  | 11 (91.67%) |   |
|           | Visit day 11     | 12 (100%) |                        | 1 (8.33%)         | 11 (91.67%)   | 12 (100%)           | 1 (8.33%)  | 11 (91.67%) |   |
|           | Visit day 12     | 12 (100%) |                        | 3 (25%)           | 9 (75%)       | 12 (100%)           | 3 (25%)    | 9 (75%)     |   |
|           | Visit day 13     | 12 (100%) | 1 (8.33%)              | 2 (16.67%)        | 9 (75%)       | 12 (100%)           | 3 (25%)    | 9 (75%)     |   |
|           | Follow-up day 15 | 12 (100%) |                        | 3 (25%)           | 9 (75%)       | 12 (100%)           | 3 (25%)    | 9 (75%)     |   |
|           | Follow-up day 45 | 12 (100%) | 1 (8.33%)              | 3 (25%)           | 8 (66.67%)    | 12 (100%)           | 4 (33.33%) | 8 (66.67%)  |   |

Executed script: \\SDS-SERVER2\SAS\$\SDS3\Projects\STATISTICS DRUG DEV\NBMI4011 - CTI002\Analyser\Script\SAS\T\_fs003.sas, on: 23MAY2016:14:00, by: maria.lidsell

Version of source data: nbmi\_ph3.sas7bdat, last modified: 24FEB16:23:13, status: Final

\*) Scores are counted according to: much better than usual=0, better than usual=0, same as usual=1, worse than usual=2, much worse than usual=3.

\*\*) Change for physical and mental fatigue score is defined as difference from 1=same as usual.

Table DE7.11.1 Categorical summary of change from usual of Physical and mental fatigue score item - Mental Fatigue Score, problems to find correct words when you speak (Full analysis set)

| Treatment    | Visit            | Result*     |                        |                   |               | Change from usual** |            |    |             |           |
|--------------|------------------|-------------|------------------------|-------------------|---------------|---------------------|------------|----|-------------|-----------|
|              |                  | n           | much better than usual | better than usual | same as usual | worse than usual    | n          | -1 | 0           | 1         |
| Total (n=36) | Visit day 2      | 36 (100%)   |                        |                   | 36 (100%)     | 36 (100%)           |            |    | 36 (100%)   |           |
|              | Visit day 3      | 36 (100%)   |                        |                   | 36 (100%)     | 36 (100%)           |            |    | 36 (100%)   |           |
|              | Visit day 4      | 36 (100%)   |                        | 1 (2.78%)         | 35 (97.22%)   | 36 (100%)           | 1 (2.78%)  |    | 35 (97.22%) |           |
|              | Visit day 5      | 36 (100%)   |                        | 2 (5.56%)         | 34 (94.44%)   | 36 (100%)           | 2 (5.56%)  |    | 34 (94.44%) |           |
|              | Visit day 6      | 36 (100%)   |                        | 2 (5.56%)         | 34 (94.44%)   | 36 (100%)           | 2 (5.56%)  |    | 34 (94.44%) |           |
|              | Visit day 7      | 36 (100%)   |                        | 4 (11.11%)        | 32 (88.89%)   | 36 (100%)           | 4 (11.11%) |    | 32 (88.89%) |           |
|              | Visit day 8      | 36 (100%)   | 1 (2.78%)              | 4 (11.11%)        | 31 (86.11%)   | 36 (100%)           | 5 (13.89%) |    | 31 (86.11%) |           |
|              | Visit day 9      | 36 (100%)   |                        |                   | 36 (100%)     | 36 (100%)           |            |    | 36 (100%)   |           |
|              | Visit day 10     | 36 (100%)   |                        | 1 (2.78%)         | 35 (97.22%)   | 36 (100%)           | 1 (2.78%)  |    | 35 (97.22%) |           |
|              | Visit day 11     | 36 (100%)   |                        | 1 (2.78%)         | 35 (97.22%)   | 36 (100%)           | 1 (2.78%)  |    | 35 (97.22%) |           |
|              | Visit day 12     | 36 (100%)   | 1 (2.78%)              | 1 (2.78%)         | 34 (94.44%)   | 36 (100%)           | 2 (5.56%)  |    | 34 (94.44%) |           |
|              | Visit day 13     | 36 (100%)   | 2 (5.56%)              | 6 (16.67%)        | 28 (77.78%)   | 36 (100%)           | 8 (22.22%) |    | 28 (77.78%) |           |
|              | Follow-up day 15 | 36 (100%)   | 3 (8.33%)              | 5 (13.89%)        | 28 (77.78%)   | 36 (100%)           | 8 (22.22%) |    | 28 (77.78%) |           |
|              | Follow-up day 45 | 36 (100%)   | 1 (2.78%)              | 8 (22.22%)        | 27 (75%)      | 36 (100%)           | 9 (25%)    |    | 27 (75%)    |           |
|              | NBMH100mg (n=13) | Visit day 2 | 13 (100%)              |                   |               | 13 (100%)           | 13 (100%)  |    |             | 13 (100%) |
| Visit day 3  |                  | 13 (100%)   |                        |                   | 13 (100%)     | 13 (100%)           |            |    | 13 (100%)   |           |
| Visit day 4  |                  | 13 (100%)   |                        |                   | 13 (100%)     | 13 (100%)           |            |    | 13 (100%)   |           |
| Visit day 5  |                  | 13 (100%)   |                        | 2 (15.38%)        | 11 (84.62%)   | 13 (100%)           | 2 (15.38%) |    | 11 (84.62%) |           |
| Visit day 6  |                  | 13 (100%)   |                        | 2 (15.38%)        | 11 (84.62%)   | 13 (100%)           | 2 (15.38%) |    | 11 (84.62%) |           |
| Visit day 7  |                  | 13 (100%)   |                        | 1 (7.69%)         | 12 (92.31%)   | 13 (100%)           | 1 (7.69%)  |    | 12 (92.31%) |           |
| Visit day 8  |                  | 13 (100%)   |                        | 2 (15.38%)        | 11 (84.62%)   | 13 (100%)           | 2 (15.38%) |    | 11 (84.62%) |           |
| Visit day 9  |                  | 13 (100%)   |                        |                   | 13 (100%)     | 13 (100%)           |            |    | 13 (100%)   |           |
| Visit day 10 |                  | 13 (100%)   |                        | 1 (7.69%)         | 12 (92.31%)   | 13 (100%)           | 1 (7.69%)  |    | 12 (92.31%) |           |

| Treatment        | Visit            | Result*   |                        |                   |               | Change from usual** |            |            |             |
|------------------|------------------|-----------|------------------------|-------------------|---------------|---------------------|------------|------------|-------------|
|                  |                  | n         | much better than usual | better than usual | same as usual | worse than usual    | n          | -1         | 0           |
| NBMI300mg (n=11) | Visit day 11     | 13 (100%) |                        |                   | 13 (100%)     |                     | 13 (100%)  | 13 (100%)  |             |
|                  | Visit day 12     | 13 (100%) |                        |                   | 13 (100%)     |                     | 13 (100%)  | 13 (100%)  |             |
|                  | Visit day 13     | 13 (100%) | 1 (7.69%)              | 2 (15.38%)        | 10 (76.92%)   |                     | 13 (100%)  | 3 (23.08%) | 10 (76.92%) |
|                  | Follow-up day 15 | 13 (100%) | 3 (23.08%)             | 1 (7.69%)         | 9 (69.23%)    |                     | 13 (100%)  | 4 (30.77%) | 9 (69.23%)  |
|                  | Follow-up day 45 | 13 (100%) | 1 (7.69%)              | 1 (7.69%)         | 11 (84.62%)   |                     | 13 (100%)  | 2 (15.38%) | 11 (84.62%) |
|                  | Visit day 2      | 11 (100%) |                        |                   | 11 (100%)     |                     | 11 (100%)  |            | 11 (100%)   |
|                  | Visit day 3      | 11 (100%) |                        |                   | 11 (100%)     |                     | 11 (100%)  |            | 11 (100%)   |
|                  | Visit day 4      | 11 (100%) |                        |                   | 11 (100%)     |                     | 11 (100%)  |            | 11 (100%)   |
|                  | Visit day 5      | 11 (100%) |                        |                   | 11 (100%)     |                     | 11 (100%)  |            | 11 (100%)   |
|                  | Visit day 6      | 11 (100%) |                        |                   | 11 (100%)     |                     | 11 (100%)  |            | 11 (100%)   |
|                  | Visit day 7      | 11 (100%) |                        | 2 (18.18%)        | 9 (81.82%)    |                     | 11 (100%)  | 2 (18.18%) | 9 (81.82%)  |
|                  | Visit day 8      | 11 (100%) |                        | 1 (9.09%)         | 10 (90.91%)   |                     | 11 (100%)  | 1 (9.09%)  | 10 (90.91%) |
|                  | Visit day 9      | 11 (100%) |                        |                   | 11 (100%)     |                     | 11 (100%)  |            | 11 (100%)   |
|                  | Visit day 10     | 11 (100%) |                        |                   | 11 (100%)     |                     | 11 (100%)  |            | 11 (100%)   |
|                  | Visit day 11     | 11 (100%) |                        | 1 (9.09%)         | 10 (90.91%)   |                     | 11 (100%)  | 1 (9.09%)  | 10 (90.91%) |
| Visit day 12     | 11 (100%)        | 1 (9.09%) | 1 (9.09%)              | 9 (81.82%)        |               | 11 (100%)           | 2 (18.18%) | 9 (81.82%) |             |
| Visit day 13     | 11 (100%)        | 1 (9.09%) | 2 (18.18%)             | 8 (72.73%)        |               | 11 (100%)           | 3 (27.27%) | 8 (72.73%) |             |
| Follow-up day 15 | 11 (100%)        |           | 3 (27.27%)             | 8 (72.73%)        |               | 11 (100%)           | 3 (27.27%) | 8 (72.73%) |             |
| Follow-up day 45 | 11 (100%)        |           | 4 (36.36%)             | 7 (63.64%)        |               | 11 (100%)           | 4 (36.36%) | 7 (63.64%) |             |
| Placebo (n=12)   | Visit day 2      | 12 (100%) |                        |                   | 12 (100%)     |                     | 12 (100%)  | 12 (100%)  |             |
|                  | Visit day 3      | 12 (100%) |                        |                   | 12 (100%)     |                     | 12 (100%)  | 12 (100%)  |             |
|                  | Visit day 4      | 12 (100%) |                        | 1 (8.33%)         | 11 (91.67%)   |                     | 12 (100%)  | 1 (8.33%)  | 11 (91.67%) |
|                  | Visit day 5      | 12 (100%) |                        |                   | 12 (100%)     |                     | 12 (100%)  | 12 (100%)  |             |
|                  | Visit day 6      | 12 (100%) |                        |                   | 12 (100%)     |                     | 12 (100%)  | 12 (100%)  |             |
|                  | Visit day 7      | 12 (100%) |                        | 1 (8.33%)         | 11 (91.67%)   |                     | 12 (100%)  | 1 (8.33%)  | 11 (91.67%) |
|                  | Visit day 8      | 12 (100%) | 1 (8.33%)              | 1 (8.33%)         | 10 (83.33%)   |                     | 12 (100%)  | 2 (16.67%) | 10 (83.33%) |



| Treatment | Visit            | Result*   |                        |                   |               | Change from usual** |            |    |             |   |
|-----------|------------------|-----------|------------------------|-------------------|---------------|---------------------|------------|----|-------------|---|
|           |                  | n         | much better than usual | better than usual | same as usual | worse than usual    | n          | -1 | 0           | 1 |
|           | Visit day 9      | 12 (100%) |                        |                   | 12 (100%)     | 12 (100%)           |            |    | 12 (100%)   |   |
|           | Visit day 10     | 12 (100%) |                        |                   | 12 (100%)     | 12 (100%)           |            |    | 12 (100%)   |   |
|           | Visit day 11     | 12 (100%) |                        |                   | 12 (100%)     | 12 (100%)           |            |    | 12 (100%)   |   |
|           | Visit day 12     | 12 (100%) |                        |                   | 12 (100%)     | 12 (100%)           |            |    | 12 (100%)   |   |
|           | Visit day 13     | 12 (100%) |                        | 2 (16.67%)        | 10 (83.33%)   | 12 (100%)           | 2 (16.67%) |    | 10 (83.33%) |   |
|           | Follow-up day 15 | 12 (100%) |                        | 1 (8.33%)         | 11 (91.67%)   | 12 (100%)           | 1 (8.33%)  |    | 11 (91.67%) |   |
|           | Follow-up day 45 | 12 (100%) |                        | 3 (25%)           | 9 (75%)       | 12 (100%)           | 3 (25%)    |    | 9 (75%)     |   |

Executed script: \\SDS-SERVER2\SAS\$\SDS3\Projects\STATISTICS DRUG DEV\NBMI4011 - CTI002\Analyser\Script\SAS\T\_fs003.sas, on: 23MAY2016:14:00, by: maria.lidsell

Version of source data: nbmi\_ph3.sas7bdat, last modified: 24FEB16:23:13, status: Final

\*) Scores are counted according to: much better than usual=0, better than usual=0, same as usual=1, worse than usual=2, much worse than usual=3.

\*\*) Change for physical and mental fatigue score is defined as difference from 1=same as usual.

Table DE7.12.1 Categorical summary of change from usual of Physical and mental fatigue score item - Mental Fatigue Score, problems with eyestrain (Full analysis set)

| Treatment    | Visit            | Result*     |                        |                   |               | Change from usual** |           |             |             |           |
|--------------|------------------|-------------|------------------------|-------------------|---------------|---------------------|-----------|-------------|-------------|-----------|
|              |                  | n           | much better than usual | better than usual | same as usual | worse than usual    | n         | -1          | 0           | 1         |
| Total (n=36) | Visit day 2      | 36 (100%)   |                        |                   | 36 (100%)     |                     | 36 (100%) |             | 36 (100%)   |           |
|              | Visit day 3      | 36 (100%)   |                        | 1 (2.78%)         | 35 (97.22%)   |                     | 36 (100%) | 1 (2.78%)   | 35 (97.22%) |           |
|              | Visit day 4      | 36 (100%)   |                        | 1 (2.78%)         | 35 (97.22%)   |                     | 36 (100%) | 1 (2.78%)   | 35 (97.22%) |           |
|              | Visit day 5      | 36 (100%)   | 3 (8.33%)              | 1 (2.78%)         | 31 (86.11%)   | 1 (2.78%)           | 36 (100%) | 4 (11.11%)  | 31 (86.11%) | 1 (2.78%) |
|              | Visit day 6      | 36 (100%)   | 4 (11.11%)             | 4 (11.11%)        | 27 (75%)      | 1 (2.78%)           | 36 (100%) | 8 (22.22%)  | 27 (75%)    | 1 (2.78%) |
|              | Visit day 7      | 36 (100%)   | 3 (8.33%)              | 3 (8.33%)         | 29 (80.56%)   | 1 (2.78%)           | 36 (100%) | 6 (16.67%)  | 29 (80.56%) | 1 (2.78%) |
|              | Visit day 8      | 36 (100%)   | 4 (11.11%)             | 3 (8.33%)         | 28 (77.78%)   | 1 (2.78%)           | 36 (100%) | 7 (19.44%)  | 28 (77.78%) | 1 (2.78%) |
|              | Visit day 9      | 36 (100%)   | 1 (2.78%)              | 2 (5.56%)         | 33 (91.67%)   |                     | 36 (100%) | 3 (8.33%)   | 33 (91.67%) |           |
|              | Visit day 10     | 36 (100%)   | 3 (8.33%)              | 3 (8.33%)         | 30 (83.33%)   |                     | 36 (100%) | 6 (16.67%)  | 30 (83.33%) |           |
|              | Visit day 11     | 36 (100%)   | 2 (5.56%)              | 3 (8.33%)         | 31 (86.11%)   |                     | 36 (100%) | 5 (13.89%)  | 31 (86.11%) |           |
|              | Visit day 12     | 36 (100%)   | 3 (8.33%)              | 4 (11.11%)        | 29 (80.56%)   |                     | 36 (100%) | 7 (19.44%)  | 29 (80.56%) |           |
|              | Visit day 13     | 36 (100%)   | 4 (11.11%)             | 4 (11.11%)        | 28 (77.78%)   |                     | 36 (100%) | 8 (22.22%)  | 28 (77.78%) |           |
|              | Follow-up day 15 | 36 (100%)   | 5 (13.89%)             | 7 (19.44%)        | 24 (66.67%)   |                     | 36 (100%) | 12 (33.33%) | 24 (66.67%) |           |
|              | Follow-up day 45 | 36 (100%)   | 4 (11.11%)             | 7 (19.44%)        | 24 (66.67%)   | 1 (2.78%)           | 36 (100%) | 11 (30.56%) | 24 (66.67%) | 1 (2.78%) |
|              | NBMH100mg (n=13) | Visit day 2 | 13 (100%)              |                   |               | 13 (100%)           |           | 13 (100%)   |             | 13 (100%) |
| Visit day 3  |                  | 13 (100%)   |                        | 1 (7.69%)         | 12 (92.31%)   |                     | 13 (100%) | 1 (7.69%)   | 12 (92.31%) |           |
| Visit day 4  |                  | 13 (100%)   |                        |                   | 13 (100%)     |                     | 13 (100%) |             | 13 (100%)   |           |
| Visit day 5  |                  | 13 (100%)   | 2 (15.38%)             |                   | 10 (76.92%)   | 1 (7.69%)           | 13 (100%) | 2 (15.38%)  | 10 (76.92%) | 1 (7.69%) |
| Visit day 6  |                  | 13 (100%)   | 4 (30.77%)             | 1 (7.69%)         | 8 (61.54%)    |                     | 13 (100%) | 5 (38.46%)  | 8 (61.54%)  |           |
| Visit day 7  |                  | 13 (100%)   | 2 (15.38%)             | 1 (7.69%)         | 9 (69.23%)    | 1 (7.69%)           | 13 (100%) | 3 (23.08%)  | 9 (69.23%)  | 1 (7.69%) |
| Visit day 8  |                  | 13 (100%)   | 3 (23.08%)             | 2 (15.38%)        | 7 (53.85%)    | 1 (7.69%)           | 13 (100%) | 5 (38.46%)  | 7 (53.85%)  | 1 (7.69%) |
| Visit day 9  |                  | 13 (100%)   | 1 (7.69%)              | 2 (15.38%)        | 10 (76.92%)   |                     | 13 (100%) | 3 (23.08%)  | 10 (76.92%) |           |
| Visit day 10 |                  | 13 (100%)   | 2 (15.38%)             | 2 (15.38%)        | 9 (69.23%)    |                     | 13 (100%) | 4 (30.77%)  | 9 (69.23%)  |           |

| Treatment        | Visit            | Result*    |                        |                   |               | Change from usual** |            |             |             |           |
|------------------|------------------|------------|------------------------|-------------------|---------------|---------------------|------------|-------------|-------------|-----------|
|                  |                  | n          | much better than usual | better than usual | same as usual | worse than usual    | n          | -1          | 0           | 1         |
| NBMI300mg (n=11) | Visit day 11     | 13 (100%)  | 2 (15.38%)             | 2 (15.38%)        | 9 (69.23%)    |                     | 13 (100%)  | 4 (30.77%)  | 9 (69.23%)  |           |
|                  | Visit day 12     | 13 (100%)  | 2 (15.38%)             | 2 (15.38%)        | 9 (69.23%)    |                     | 13 (100%)  | 4 (30.77%)  | 9 (69.23%)  |           |
|                  | Visit day 13     | 13 (100%)  | 3 (23.08%)             | 2 (15.38%)        | 8 (61.54%)    |                     | 13 (100%)  | 5 (38.46%)  | 8 (61.54%)  |           |
|                  | Follow-up day 15 | 13 (100%)  | 4 (30.77%)             | 2 (15.38%)        | 7 (53.85%)    |                     | 13 (100%)  | 6 (46.15%)  | 7 (53.85%)  |           |
|                  | Follow-up day 45 | 13 (100%)  | 2 (15.38%)             | 3 (23.08%)        | 7 (53.85%)    | 1 (7.69%)           | 13 (100%)  | 5 (38.46%)  | 7 (53.85%)  | 1 (7.69%) |
|                  | Visit day 2      | 11 (100%)  |                        |                   | 11 (100%)     |                     | 11 (100%)  |             | 11 (100%)   |           |
|                  | Visit day 3      | 11 (100%)  |                        |                   | 11 (100%)     |                     | 11 (100%)  |             | 11 (100%)   |           |
|                  | Visit day 4      | 11 (100%)  |                        |                   | 11 (100%)     |                     | 11 (100%)  |             | 11 (100%)   |           |
|                  | Visit day 5      | 11 (100%)  |                        | 1 (9.09%)         | 10 (90.91%)   |                     | 11 (100%)  | 1 (9.09%)   | 10 (90.91%) |           |
|                  | Visit day 6      | 11 (100%)  |                        | 2 (18.18%)        | 8 (72.73%)    | 1 (9.09%)           | 11 (100%)  | 2 (18.18%)  | 8 (72.73%)  | 1 (9.09%) |
|                  | Visit day 7      | 11 (100%)  | 1 (9.09%)              | 1 (9.09%)         | 9 (81.82%)    |                     | 11 (100%)  | 2 (18.18%)  | 9 (81.82%)  |           |
|                  | Visit day 8      | 11 (100%)  |                        |                   | 11 (100%)     |                     | 11 (100%)  |             | 11 (100%)   |           |
|                  | Visit day 9      | 11 (100%)  |                        |                   | 11 (100%)     |                     | 11 (100%)  |             | 11 (100%)   |           |
|                  | Visit day 10     | 11 (100%)  |                        |                   | 11 (100%)     |                     | 11 (100%)  |             | 11 (100%)   |           |
|                  | Visit day 11     | 11 (100%)  |                        | 1 (9.09%)         | 10 (90.91%)   |                     | 11 (100%)  | 1 (9.09%)   | 10 (90.91%) |           |
| Visit day 12     | 11 (100%)        | 1 (9.09%)  |                        | 10 (90.91%)       |               | 11 (100%)           | 1 (9.09%)  | 10 (90.91%) |             |           |
| Visit day 13     | 11 (100%)        | 1 (9.09%)  |                        | 10 (90.91%)       |               | 11 (100%)           | 1 (9.09%)  | 10 (90.91%) |             |           |
| Follow-up day 15 | 11 (100%)        | 1 (9.09%)  | 4 (36.36%)             | 6 (54.55%)        |               | 11 (100%)           | 5 (45.45%) | 6 (54.55%)  |             |           |
| Follow-up day 45 | 11 (100%)        | 2 (18.18%) | 2 (18.18%)             | 7 (63.64%)        |               | 11 (100%)           | 4 (36.36%) | 7 (63.64%)  |             |           |
| Placebo (n=12)   | Visit day 2      | 12 (100%)  |                        |                   | 12 (100%)     |                     | 12 (100%)  |             | 12 (100%)   |           |
|                  | Visit day 3      | 12 (100%)  |                        |                   | 12 (100%)     |                     | 12 (100%)  |             | 12 (100%)   |           |
|                  | Visit day 4      | 12 (100%)  |                        | 1 (8.33%)         | 11 (91.67%)   |                     | 12 (100%)  | 1 (8.33%)   | 11 (91.67%) |           |
|                  | Visit day 5      | 12 (100%)  | 1 (8.33%)              |                   | 11 (91.67%)   |                     | 12 (100%)  | 1 (8.33%)   | 11 (91.67%) |           |
|                  | Visit day 6      | 12 (100%)  |                        | 1 (8.33%)         | 11 (91.67%)   |                     | 12 (100%)  | 1 (8.33%)   | 11 (91.67%) |           |
|                  | Visit day 7      | 12 (100%)  |                        | 1 (8.33%)         | 11 (91.67%)   |                     | 12 (100%)  | 1 (8.33%)   | 11 (91.67%) |           |
|                  | Visit day 8      | 12 (100%)  | 1 (8.33%)              | 1 (8.33%)         | 10 (83.33%)   |                     | 12 (100%)  | 2 (16.67%)  | 10 (83.33%) |           |

| Treatment | Visit            | Result*   |                        |                   |               | Change from usual** |           |            |             |   |
|-----------|------------------|-----------|------------------------|-------------------|---------------|---------------------|-----------|------------|-------------|---|
|           |                  | n         | much better than usual | better than usual | same as usual | worse than usual    | n         | -1         | 0           | 1 |
|           | Visit day 9      | 12 (100%) |                        |                   | 12 (100%)     |                     | 12 (100%) |            | 12 (100%)   |   |
|           | Visit day 10     | 12 (100%) | 1 (8.33%)              | 1 (8.33%)         | 10 (83.33%)   |                     | 12 (100%) | 2 (16.67%) | 10 (83.33%) |   |
|           | Visit day 11     | 12 (100%) |                        |                   | 12 (100%)     |                     | 12 (100%) |            | 12 (100%)   |   |
|           | Visit day 12     | 12 (100%) |                        | 2 (16.67%)        | 10 (83.33%)   |                     | 12 (100%) | 2 (16.67%) | 10 (83.33%) |   |
|           | Visit day 13     | 12 (100%) |                        | 2 (16.67%)        | 10 (83.33%)   |                     | 12 (100%) | 2 (16.67%) | 10 (83.33%) |   |
|           | Follow-up day 15 | 12 (100%) |                        | 1 (8.33%)         | 11 (91.67%)   |                     | 12 (100%) | 1 (8.33%)  | 11 (91.67%) |   |
|           | Follow-up day 45 | 12 (100%) |                        | 2 (16.67%)        | 10 (83.33%)   |                     | 12 (100%) | 2 (16.67%) | 10 (83.33%) |   |

Executed script: \\SDS-SERVER2\SAS\$\SDS3\Projects\STATISTICS DRUG DEV\NBMI4011 - CTI002\Analyser\Script\SAS\T\_fs003.sas, on: 23MAY2016:14:00, by: maria.lidsell

Version of source data: nbmi\_ph3.sas7bdat, last modified: 24FEB16:23:13, status: Final

\*) Scores are counted according to: much better than usual=0, better than usual=0, same as usual=1, worse than usual=2, much worse than usual=3.

\*\*\*) Change for physical and mental fatigue score is defined as difference from 1=same as usual.

Table DE7.13.1 Categorical summary of change from usual of Physical and mental fatigue score item - Mental Fatigue Score, problems with memory (Full analysis set)

| Treatment        | Visit            | Result*   |                        |                   | Change from usual** |                  |           |             |             |   |
|------------------|------------------|-----------|------------------------|-------------------|---------------------|------------------|-----------|-------------|-------------|---|
|                  |                  | n         | much better than usual | better than usual | same as usual       | worse than usual | n         | -1          | 0           | 1 |
| Total (n=36)     | Visit day 2      | 36 (100%) |                        |                   | 36 (100%)           |                  | 36 (100%) |             | 36 (100%)   |   |
|                  | Visit day 3      | 36 (100%) |                        | 4 (11.11%)        | 32 (88.89%)         |                  | 36 (100%) | 4 (11.11%)  | 32 (88.89%) |   |
|                  | Visit day 4      | 36 (100%) |                        | 5 (13.89%)        | 31 (86.11%)         |                  | 36 (100%) | 5 (13.89%)  | 31 (86.11%) |   |
|                  | Visit day 5      | 36 (100%) |                        | 4 (11.11%)        | 32 (88.89%)         |                  | 36 (100%) | 4 (11.11%)  | 32 (88.89%) |   |
|                  | Visit day 6      | 36 (100%) | 1 (2.78%)              | 6 (16.67%)        | 29 (80.56%)         |                  | 36 (100%) | 7 (19.44%)  | 29 (80.56%) |   |
|                  | Visit day 7      | 36 (100%) | 1 (2.78%)              | 7 (19.44%)        | 28 (77.78%)         |                  | 36 (100%) | 8 (22.22%)  | 28 (77.78%) |   |
|                  | Visit day 8      | 36 (100%) | 1 (2.78%)              | 7 (19.44%)        | 28 (77.78%)         |                  | 36 (100%) | 8 (22.22%)  | 28 (77.78%) |   |
|                  | Visit day 9      | 36 (100%) |                        | 7 (19.44%)        | 29 (80.56%)         |                  | 36 (100%) | 7 (19.44%)  | 29 (80.56%) |   |
|                  | Visit day 10     | 36 (100%) |                        | 6 (16.67%)        | 30 (83.33%)         |                  | 36 (100%) | 6 (16.67%)  | 30 (83.33%) |   |
|                  | Visit day 11     | 36 (100%) | 1 (2.78%)              | 6 (16.67%)        | 29 (80.56%)         |                  | 36 (100%) | 7 (19.44%)  | 29 (80.56%) |   |
|                  | Visit day 12     | 36 (100%) | 1 (2.78%)              | 7 (19.44%)        | 28 (77.78%)         |                  | 36 (100%) | 8 (22.22%)  | 28 (77.78%) |   |
|                  | Visit day 13     | 36 (100%) | 2 (5.56%)              | 7 (19.44%)        | 27 (75%)            |                  | 36 (100%) | 9 (25%)     | 27 (75%)    |   |
|                  | Follow-up day 15 | 36 (100%) | 2 (5.56%)              | 10 (27.78%)       | 24 (66.67%)         |                  | 36 (100%) | 12 (33.33%) | 24 (66.67%) |   |
|                  | Follow-up day 45 | 36 (100%) | 3 (8.33%)              | 10 (27.78%)       | 23 (63.89%)         |                  | 36 (100%) | 13 (36.11%) | 23 (63.89%) |   |
| NBMH100mg (n=13) | Visit day 2      | 13 (100%) |                        |                   | 13 (100%)           |                  | 13 (100%) |             | 13 (100%)   |   |
|                  | Visit day 3      | 13 (100%) |                        | 3 (23.08%)        | 10 (76.92%)         |                  | 13 (100%) | 3 (23.08%)  | 10 (76.92%) |   |
|                  | Visit day 4      | 13 (100%) |                        | 2 (15.38%)        | 11 (84.62%)         |                  | 13 (100%) | 2 (15.38%)  | 11 (84.62%) |   |
|                  | Visit day 5      | 13 (100%) |                        | 3 (23.08%)        | 10 (76.92%)         |                  | 13 (100%) | 3 (23.08%)  | 10 (76.92%) |   |
|                  | Visit day 6      | 13 (100%) | 1 (7.69%)              | 3 (23.08%)        | 9 (69.23%)          |                  | 13 (100%) | 4 (30.77%)  | 9 (69.23%)  |   |
|                  | Visit day 7      | 13 (100%) |                        | 2 (15.38%)        | 11 (84.62%)         |                  | 13 (100%) | 2 (15.38%)  | 11 (84.62%) |   |
|                  | Visit day 8      | 13 (100%) |                        | 3 (23.08%)        | 10 (76.92%)         |                  | 13 (100%) | 3 (23.08%)  | 10 (76.92%) |   |
|                  | Visit day 9      | 13 (100%) |                        | 2 (15.38%)        | 11 (84.62%)         |                  | 13 (100%) | 2 (15.38%)  | 11 (84.62%) |   |
|                  | Visit day 10     | 13 (100%) |                        | 2 (15.38%)        | 11 (84.62%)         |                  | 13 (100%) | 2 (15.38%)  | 11 (84.62%) |   |

| Treatment        | Visit            | Result*   |                        |                   |               | Change from usual** |            |             |   |
|------------------|------------------|-----------|------------------------|-------------------|---------------|---------------------|------------|-------------|---|
|                  |                  | n         | much better than usual | better than usual | same as usual | worse than usual    | n          | -1          | 0 |
| NBMI300mg (n=11) | Visit day 11     | 13 (100%) |                        | 1 (7.69%)         | 12 (92.31%)   | 13 (100%)           | 1 (7.69%)  | 12 (92.31%) |   |
|                  | Visit day 12     | 13 (100%) |                        | 2 (15.38%)        | 11 (84.62%)   | 13 (100%)           | 2 (15.38%) | 11 (84.62%) |   |
|                  | Visit day 13     | 13 (100%) | 1 (7.69%)              | 2 (15.38%)        | 10 (76.92%)   | 13 (100%)           | 3 (23.08%) | 10 (76.92%) |   |
|                  | Follow-up day 15 | 13 (100%) | 2 (15.38%)             | 3 (23.08%)        | 8 (61.54%)    | 13 (100%)           | 5 (38.46%) | 8 (61.54%)  |   |
|                  | Follow-up day 45 | 13 (100%) | 1 (7.69%)              | 2 (15.38%)        | 10 (76.92%)   | 13 (100%)           | 3 (23.08%) | 10 (76.92%) |   |
|                  | Visit day 2      | 11 (100%) |                        |                   | 11 (100%)     | 11 (100%)           |            | 11 (100%)   |   |
|                  | Visit day 3      | 11 (100%) |                        |                   | 11 (100%)     | 11 (100%)           |            | 11 (100%)   |   |
|                  | Visit day 4      | 11 (100%) |                        | 1 (9.09%)         | 10 (90.91%)   | 11 (100%)           | 1 (9.09%)  | 10 (90.91%) |   |
|                  | Visit day 5      | 11 (100%) |                        |                   | 11 (100%)     | 11 (100%)           |            | 11 (100%)   |   |
|                  | Visit day 6      | 11 (100%) |                        | 1 (9.09%)         | 10 (90.91%)   | 11 (100%)           | 1 (9.09%)  | 10 (90.91%) |   |
|                  | Visit day 7      | 11 (100%) | 1 (9.09%)              | 1 (9.09%)         | 9 (81.82%)    | 11 (100%)           | 2 (18.18%) | 9 (81.82%)  |   |
|                  | Visit day 8      | 11 (100%) |                        | 2 (18.18%)        | 9 (81.82%)    | 11 (100%)           | 2 (18.18%) | 9 (81.82%)  |   |
|                  | Visit day 9      | 11 (100%) |                        | 2 (18.18%)        | 9 (81.82%)    | 11 (100%)           | 2 (18.18%) | 9 (81.82%)  |   |
|                  | Visit day 10     | 11 (100%) |                        | 2 (18.18%)        | 9 (81.82%)    | 11 (100%)           | 2 (18.18%) | 9 (81.82%)  |   |
|                  | Visit day 11     | 11 (100%) | 1 (9.09%)              | 2 (18.18%)        | 8 (72.73%)    | 11 (100%)           | 3 (27.27%) | 8 (72.73%)  |   |
|                  | Visit day 12     | 11 (100%) | 1 (9.09%)              | 2 (18.18%)        | 8 (72.73%)    | 11 (100%)           | 3 (27.27%) | 8 (72.73%)  |   |
|                  | Visit day 13     | 11 (100%) |                        | 4 (36.36%)        | 7 (63.64%)    | 11 (100%)           | 4 (36.36%) | 7 (63.64%)  |   |
| Follow-up day 15 | 11 (100%)        |           | 4 (36.36%)             | 7 (63.64%)        | 11 (100%)     | 4 (36.36%)          | 7 (63.64%) |             |   |
| Follow-up day 45 | 11 (100%)        | 1 (9.09%) | 3 (27.27%)             | 7 (63.64%)        | 11 (100%)     | 4 (36.36%)          | 7 (63.64%) |             |   |
| Placebo (n=12)   | Visit day 2      | 12 (100%) |                        |                   | 12 (100%)     | 12 (100%)           |            | 12 (100%)   |   |
|                  | Visit day 3      | 12 (100%) |                        | 1 (8.33%)         | 11 (91.67%)   | 12 (100%)           | 1 (8.33%)  | 11 (91.67%) |   |
|                  | Visit day 4      | 12 (100%) |                        | 2 (16.67%)        | 10 (83.33%)   | 12 (100%)           | 2 (16.67%) | 10 (83.33%) |   |
|                  | Visit day 5      | 12 (100%) |                        | 1 (8.33%)         | 11 (91.67%)   | 12 (100%)           | 1 (8.33%)  | 11 (91.67%) |   |
|                  | Visit day 6      | 12 (100%) |                        | 2 (16.67%)        | 10 (83.33%)   | 12 (100%)           | 2 (16.67%) | 10 (83.33%) |   |
|                  | Visit day 7      | 12 (100%) |                        | 4 (33.33%)        | 8 (66.67%)    | 12 (100%)           | 4 (33.33%) | 8 (66.67%)  |   |
|                  | Visit day 8      | 12 (100%) | 1 (8.33%)              | 2 (16.67%)        | 9 (75%)       | 12 (100%)           | 3 (25%)    | 9 (75%)     |   |

| Treatment | Visit            | Result*   |                        |                   |               | Change from usual** |            |             |   |
|-----------|------------------|-----------|------------------------|-------------------|---------------|---------------------|------------|-------------|---|
|           |                  | n         | much better than usual | better than usual | same as usual | worse than usual    | n          | -1          | 0 |
|           | Visit day 9      | 12 (100%) |                        | 3 (25%)           | 9 (75%)       | 12 (100%)           | 3 (25%)    | 9 (75%)     |   |
|           | Visit day 10     | 12 (100%) |                        | 2 (16.67%)        | 10 (83.33%)   | 12 (100%)           | 2 (16.67%) | 10 (83.33%) |   |
|           | Visit day 11     | 12 (100%) |                        | 3 (25%)           | 9 (75%)       | 12 (100%)           | 3 (25%)    | 9 (75%)     |   |
|           | Visit day 12     | 12 (100%) |                        | 3 (25%)           | 9 (75%)       | 12 (100%)           | 3 (25%)    | 9 (75%)     |   |
|           | Visit day 13     | 12 (100%) | 1 (8.33%)              | 1 (8.33%)         | 10 (83.33%)   | 12 (100%)           | 2 (16.67%) | 10 (83.33%) |   |
|           | Follow-up day 15 | 12 (100%) |                        | 3 (25%)           | 9 (75%)       | 12 (100%)           | 3 (25%)    | 9 (75%)     |   |
|           | Follow-up day 45 | 12 (100%) | 1 (8.33%)              | 5 (41.67%)        | 6 (50%)       | 12 (100%)           | 6 (50%)    | 6 (50%)     |   |

Executed script: \\SDS-SERVER2\SAS\$\SDS3\Projects\STATISTICS DRUG DEV\NBMI4011 - CTI002\Analyser\Script\SAS\T\_fs003.sas, on: 23MAY2016:14:00, by: maria.lidsell

Version of source data: nbmi\_ph3.sas7bdat, last modified: 24FEB16:23:13, status: Final

\*) Scores are counted according to: much better than usual=0, better than usual=0, same as usual=1, worse than usual=2, much worse than usual=3.

\*\*) Change for physical and mental fatigue score is defined as difference from 1=same as usual.

Table DE8.1 Categorical summary of change from baseline of finger to nose test (Full analysis set)

| Treatment        | Visit            | Result*   |             |             | Change** from baseline (Visit day 1) |           |            |             |             |
|------------------|------------------|-----------|-------------|-------------|--------------------------------------|-----------|------------|-------------|-------------|
|                  |                  | n         | ABSENT      | SLIGHT      | MODERATE                             | n         | -1         | 0           | 1           |
| Total (n=36)     | Visit day 1      | 36 (100%) | 22 (61.11%) | 14 (38.89%) |                                      |           |            |             |             |
|                  | Follow-up day 15 | 36 (100%) | 20 (55.56%) | 15 (41.67%) | 1 (2.78%)                            | 36 (100%) | 5 (13.89%) | 23 (63.89%) | 8 (22.22%)  |
|                  | Follow-up day 45 | 36 (100%) | 15 (41.67%) | 20 (55.56%) | 1 (2.78%)                            | 36 (100%) | 5 (13.89%) | 19 (52.78%) | 11 (30.56%) |
| NBMI100mg (n=13) | Visit day 1      | 13 (100%) | 5 (38.46%)  | 8 (61.54%)  |                                      |           |            |             |             |
|                  | Follow-up day 15 | 13 (100%) | 4 (30.77%)  | 8 (61.54%)  | 1 (7.69%)                            | 13 (100%) | 2 (15.38%) | 7 (53.85%)  | 4 (30.77%)  |
|                  | Follow-up day 45 | 13 (100%) | 5 (38.46%)  | 8 (61.54%)  |                                      | 13 (100%) | 2 (15.38%) | 9 (69.23%)  | 2 (15.38%)  |
| NBMI300mg (n=11) | Visit day 1      | 11 (100%) | 8 (72.73%)  | 3 (27.27%)  |                                      |           |            |             |             |
|                  | Follow-up day 15 | 11 (100%) | 8 (72.73%)  | 3 (27.27%)  |                                      | 11 (100%) | 1 (9.09%)  | 9 (81.82%)  | 1 (9.09%)   |
|                  | Follow-up day 45 | 11 (100%) | 4 (36.36%)  | 6 (54.55%)  | 1 (9.09%)                            | 11 (100%) |            | 7 (63.64%)  | 3 (27.27%)  |
| Placebo (n=12)   | Visit day 1      | 12 (100%) | 9 (75%)     | 3 (25%)     |                                      |           |            |             |             |
|                  | Follow-up day 15 | 12 (100%) | 8 (66.67%)  | 4 (33.33%)  |                                      | 12 (100%) | 2 (16.67%) | 7 (58.33%)  | 3 (25%)     |
|                  | Follow-up day 45 | 12 (100%) | 6 (50%)     | 6 (50%)     |                                      | 12 (100%) | 3 (25%)    | 3 (25%)     | 6 (50%)     |

Executed script: \\SDS-SERVER2\SAS\$\SDS3\Projects\STATISTICS DRUG DEV\NBMI4011 - CTI002\Analyser\Script\SAS\T\_tfn001.sas, on: 23MAY2016:14:00, by: maria.lidsell

Version of source data: nbmi\_tre.sas7bdat, last modified: 24FEB16:23:14, status: Final

\*) Results are scored as ABSENT=0, SLIGHT=1, MODERATE=2.

\*\*) Change can be interpreted as negative number=better, 0=unchanged, positive number=worse.



Table DE9.1 Shift table of Baseline vs. post baseline of finger to nose test (Full analysis set)

| Visit            | Treatment        | Baseline score*<br>(Visit day 1) | Post baseline score* |             |           | Total       |
|------------------|------------------|----------------------------------|----------------------|-------------|-----------|-------------|
|                  |                  |                                  | 0                    | 1           | 2         |             |
| Follow-up day 15 | Total (n=36)     | 0                                | 15 (68.18%)          | 7 (31.82%)  |           | 22 (61.11%) |
|                  |                  | 1                                | 5 (35.71%)           | 8 (57.14%)  | 1 (7.14%) | 14 (38.89%) |
|                  |                  | Total                            | 20 (55.56%)          | 15 (41.67%) | 1 (2.78%) | 36 (100%)   |
|                  | NBMI100mg (n=13) | 0                                | 2 (40%)              | 3 (60%)     |           | 5 (38.46%)  |
|                  |                  | 1                                | 2 (25%)              | 5 (62.5%)   | 1 (12.5%) | 8 (61.54%)  |
|                  |                  | Total                            | 4 (30.77%)           | 8 (61.54%)  | 1 (7.69%) | 13 (100%)   |
|                  | NBMI300mg (n=11) | 0                                | 7 (87.5%)            | 1 (12.5%)   |           | 8 (72.73%)  |
|                  |                  | 1                                | 1 (33.33%)           | 2 (66.67%)  |           | 3 (27.27%)  |
|                  |                  | Total                            | 8 (72.73%)           | 3 (27.27%)  |           | 11 (100%)   |
|                  | Placebo (n=12)   | 0                                | 6 (66.67%)           | 3 (33.33%)  |           | 9 (75%)     |
|                  |                  | 1                                | 2 (66.67%)           | 1 (33.33%)  |           | 3 (25%)     |
|                  |                  | Total                            | 8 (66.67%)           | 4 (33.33%)  |           | 12 (100%)   |
| Follow-up day 45 | Total (n=36)     | 0                                | 10 (45.45%)          | 11 (50%)    | 1 (4.55%) | 22 (61.11%) |
|                  |                  | 1                                | 5 (35.71%)           | 9 (64.29%)  |           | 14 (38.89%) |
|                  |                  | Total                            | 15 (41.67%)          | 20 (55.56%) | 1 (2.78%) | 36 (100%)   |
|                  | NBMI100mg (n=13) | 0                                | 3 (60%)              | 2 (40%)     |           | 5 (38.46%)  |
|                  |                  | 1                                | 2 (25%)              | 6 (75%)     |           | 8 (61.54%)  |
|                  |                  | Total                            | 5 (38.46%)           | 8 (61.54%)  |           | 13 (100%)   |
|                  | NBMI300mg (n=11) | 0                                | 4 (50%)              | 3 (37.5%)   | 1 (12.5%) | 8 (72.73%)  |
|                  |                  | 1                                |                      | 3 (100%)    |           | 3 (27.27%)  |
|                  |                  | Total                            | 4 (36.36%)           | 6 (54.55%)  | 1 (9.09%) | 11 (100%)   |
|                  | Placebo (n=12)   | 0                                | 3 (33.33%)           | 6 (66.67%)  |           | 9 (75%)     |
|                  |                  | 1                                | 3 (100%)             |             |           | 3 (25%)     |
|                  |                  | Total                            | 6 (50%)              | 6 (50%)     |           | 12 (100%)   |

Executed script: \\SDS-SERVER2\SAS\$\SDS3\Projects\STATISTICS DRUG DEV\NBMI4011 - CTI002\Analyser\Script\SAS\T\_tfn002.sas, on: 23MAY2016:14:00, by: maria.lidsell  
Version of source data: nbmi\_tre.sas7bdat, last modified: 24FEB16:23:14, status: Final  
\*) Scores are 0=ABSENT, 1=SLIGHT, 2=MODERATE.

Table DE10.1.1 Change from baseline of Memory loss digit span test, Digit span backwards (Full analysis set)

| Treatment        | Visit            | Result      |        |      |      |    |        |    |     |     | Change from baseline (Visit day 1) |        |      |      |    |        |    |     |     |
|------------------|------------------|-------------|--------|------|------|----|--------|----|-----|-----|------------------------------------|--------|------|------|----|--------|----|-----|-----|
|                  |                  | n           | nmiss  | Mean | SD   | Q1 | Median | Q3 | Min | Max | n                                  | nmiss  | Mean | SD   | Q1 | Median | Q3 | Min | Max |
| Total (n=36)     | Visit day 1      | 17 (47.22%) | 0 (0%) | 3.3  | 0.92 | 2  | 4      | 4  | 2   | 4   |                                    |        |      |      |    |        |    |     |     |
|                  | Follow-up day 15 | 17 (47.22%) | 0 (0%) | 3.6  | 0.61 | 3  | 4      | 4  | 3   | 5   | 17 (47.22%)                        | 0 (0%) | 0.4  | 1    | 0  | 0      | 1  | -1  | 2   |
|                  | Follow-up day 45 | 17 (47.22%) | 0 (0%) | 4    | 1    | 3  | 4      | 5  | 2   | 6   | 17 (47.22%)                        | 0 (0%) | 0.7  | 1.05 | 0  | 1      | 1  | -1  | 3   |
| NBMI100mg (n=13) | Visit day 1      | 6 (46.15%)  | 0 (0%) | 3.3  | 0.82 | 3  | 3.5    | 4  | 2   | 4   |                                    |        |      |      |    |        |    |     |     |
|                  | Follow-up day 15 | 6 (46.15%)  | 0 (0%) | 3.8  | 0.75 | 3  | 4      | 4  | 3   | 5   | 6 (46.15%)                         | 0 (0%) | 0.5  | 0.84 | 0  | 0      | 1  | 0   | 2   |
|                  | Follow-up day 45 | 6 (46.15%)  | 0 (0%) | 4    | 0.63 | 4  | 4      | 4  | 3   | 5   | 6 (46.15%)                         | 0 (0%) | 0.7  | 0.52 | 0  | 1      | 1  | 0   | 1   |
| NBMI300mg (n=11) | Visit day 1      | 5 (45.45%)  | 0 (0%) | 3.2  | 1.1  | 2  | 4      | 4  | 2   | 4   |                                    |        |      |      |    |        |    |     |     |
|                  | Follow-up day 15 | 5 (45.45%)  | 0 (0%) | 3.8  | 0.45 | 4  | 4      | 4  | 3   | 4   | 5 (45.45%)                         | 0 (0%) | 0.6  | 1.34 | 0  | 0      | 2  | -1  | 2   |
|                  | Follow-up day 45 | 5 (45.45%)  | 0 (0%) | 4.6  | 0.89 | 4  | 4      | 5  | 4   | 6   | 5 (45.45%)                         | 0 (0%) | 1.4  | 1.34 | 0  | 2      | 2  | 0   | 3   |
| Placebo (n=12)   | Visit day 1      | 6 (50%)     | 0 (0%) | 3.3  | 1.03 | 2  | 4      | 4  | 2   | 4   |                                    |        |      |      |    |        |    |     |     |
|                  | Follow-up day 15 | 6 (50%)     | 0 (0%) | 3.3  | 0.52 | 3  | 3      | 4  | 3   | 4   | 6 (50%)                            | 0 (0%) | 0    | 0.89 | -1 | 0      | 1  | -1  | 1   |
|                  | Follow-up day 45 | 6 (50%)     | 0 (0%) | 3.5  | 1.22 | 3  | 3      | 5  | 2   | 5   | 6 (50%)                            | 0 (0%) | 0.2  | 0.98 | -1 | 0.5    | 1  | -1  | 1   |

Executed script: \\SDS-SERVER2\SAS\$\SDS3\Projects\STATISTICS DRUG DEV\NBMI4011 - CTI002\Analyser\Script\SAS\T\_mds001.sas, on: 23MAY2016:14:00, by: maria.lidsell  
Version of source data: nbmi\_mb1.sas7bdat, last modified: 24FEB16:23:13, status: Final

Table DE10.2.1 Change from baseline of Memory loss digit span test, Digit span forward (Full analysis set)

| Treatment        | Visit            | Result      |        |      |      |    |        |    |     |     |             | Change from baseline (Visit day 1) |      |      |    |        |    |     |     |
|------------------|------------------|-------------|--------|------|------|----|--------|----|-----|-----|-------------|------------------------------------|------|------|----|--------|----|-----|-----|
|                  |                  | n           | nmiss  | Mean | SD   | Q1 | Median | Q3 | Min | Max | n           | nmiss                              | Mean | SD   | Q1 | Median | Q3 | Min | Max |
| Total (n=36)     | Visit day 1      | 17 (47.22%) | 0 (0%) | 5    | 0.94 | 4  | 5      | 5  | 4   | 7   |             |                                    |      |      |    |        |    |     |     |
|                  | Follow-up day 15 | 17 (47.22%) | 0 (0%) | 5.5  | 1.07 | 5  | 5      | 6  | 4   | 8   | 17 (47.22%) | 0 (0%)                             | 0.5  | 1.12 | 0  | 1      | 1  | -2  | 3   |
|                  | Follow-up day 45 | 17 (47.22%) | 0 (0%) | 5.2  | 0.9  | 5  | 5      | 5  | 4   | 8   | 17 (47.22%) | 0 (0%)                             | 0.2  | 0.83 | 0  | 0      | 1  | -2  | 1   |
| NBMI100mg (n=13) | Visit day 1      | 6 (46.15%)  | 0 (0%) | 4.8  | 1.17 | 4  | 4.5    | 5  | 4   | 7   |             |                                    |      |      |    |        |    |     |     |
|                  | Follow-up day 15 | 6 (46.15%)  | 0 (0%) | 5.3  | 1.03 | 5  | 5      | 6  | 4   | 7   | 6 (46.15%)  | 0 (0%)                             | 0.5  | 0.55 | 0  | 0.5    | 1  | 0   | 1   |
|                  | Follow-up day 45 | 6 (46.15%)  | 0 (0%) | 5.7  | 1.37 | 5  | 5.5    | 6  | 4   | 8   | 6 (46.15%)  | 0 (0%)                             | 0.8  | 0.41 | 1  | 1      | 1  | 0   | 1   |
| NBMI300mg (n=11) | Visit day 1      | 5 (45.45%)  | 0 (0%) | 5.6  | 0.89 | 5  | 5      | 6  | 5   | 7   |             |                                    |      |      |    |        |    |     |     |
|                  | Follow-up day 15 | 5 (45.45%)  | 0 (0%) | 5.8  | 1.3  | 5  | 5      | 6  | 5   | 8   | 5 (45.45%)  | 0 (0%)                             | 0.2  | 1.92 | -1 | 0      | 1  | -2  | 3   |
|                  | Follow-up day 45 | 5 (45.45%)  | 0 (0%) | 5    | 0    | 5  | 5      | 5  | 5   | 5   | 5 (45.45%)  | 0 (0%)                             | -0.6 | 0.89 | -1 | 0      | 0  | -2  | 0   |
| Placebo (n=12)   | Visit day 1      | 6 (50%)     | 0 (0%) | 4.7  | 0.52 | 4  | 5      | 5  | 4   | 5   |             |                                    |      |      |    |        |    |     |     |
|                  | Follow-up day 15 | 6 (50%)     | 0 (0%) | 5.5  | 1.05 | 5  | 5.5    | 6  | 4   | 7   | 6 (50%)     | 0 (0%)                             | 0.8  | 0.75 | 0  | 1      | 1  | 0   | 2   |
|                  | Follow-up day 45 | 6 (50%)     | 0 (0%) | 5    | 0.63 | 5  | 5      | 5  | 4   | 6   | 6 (50%)     | 0 (0%)                             | 0.3  | 0.52 | 0  | 0      | 1  | 0   | 1   |

Executed script: \\SDS-SERVER2\SAS\$\SDS3\Projects\STATISTICS DRUG DEV\NBMI4011 - CTI002\Analyser\Script\SAS\T\_mds001.sas, on: 23MAY2016:14:00, by: maria.lidsell  
Version of source data: nbmi\_mb1.sas7bdat, last modified: 24FEB16:23:13, status: Final

Table DE11.1.1 Change from baseline of Plasma Hg ( $\mu\text{g/L}$ ) (Full analysis set)

| Treatment        | Visit            | Result      |           | Change from baseline (Visit day 1) |       |       |        |        |       |      |             |           |      |       |        |        |      |        |      |  |
|------------------|------------------|-------------|-----------|------------------------------------|-------|-------|--------|--------|-------|------|-------------|-----------|------|-------|--------|--------|------|--------|------|--|
|                  |                  | n           | nmiss     | Mean                               | SD    | Q1    | Median | Q3     | Min   | Max  | n           | nmiss     | Mean | SD    | Q1     | Median | Q3   | Min    | Max  |  |
| Total (n=36)     | Visit day 1      | 36 (100%)   | 0 (0%)    | 14.6                               | 19.63 | 3.405 | 6.12   | 20     | 1.3   | 95.9 |             |           |      |       |        |        |      |        |      |  |
|                  | Follow-up day 15 | 36 (100%)   | 0 (0%)    | 11.4                               | 13.23 | 2.985 | 5.97   | 17.4   | 1.46  | 64.4 | 36 (100%)   | 0 (0%)    | -3.1 | 9.15  | -2.815 | -0.335 | 0.73 | -35.7  | 7.8  |  |
|                  | Follow-up day 45 | 35 (97.22%) | 1 (2.78%) | 14.9                               | 20.91 | 2.72  | 6.3    | 17.6   | 0.971 | 90.1 | 35 (97.22%) | 1 (2.78%) | 0.1  | 18.29 | -2.22  | -0.25  | 2.75 | -48.13 | 56.5 |  |
| NBMI100mg (n=13) | Visit day 1      | 13 (100%)   | 0 (0%)    | 10.5                               | 8.27  | 4.96  | 6.42   | 18.8   | 1.66  | 25.8 |             |           |      |       |        |        |      |        |      |  |
|                  | Follow-up day 15 | 13 (100%)   | 0 (0%)    | 10.2                               | 9.24  | 3.28  | 7.98   | 11     | 2.56  | 33.6 | 13 (100%)   | 0 (0%)    | -0.3 | 3.65  | -2.4   | -0.7   | 1.62 | -7.8   | 7.8  |  |
|                  | Follow-up day 45 | 13 (100%)   | 0 (0%)    | 12.4                               | 12.84 | 3.5   | 9.3    | 14.5   | 1.57  | 42.2 | 13 (100%)   | 0 (0%)    | 1.9  | 6.79  | -2.22  | -0.22  | 5.28 | -8     | 16.4 |  |
| NBMI300mg (n=11) | Visit day 1      | 11 (100%)   | 0 (0%)    | 21.8                               | 31.03 | 2.34  | 5.81   | 45.7   | 1.3   | 95.9 |             |           |      |       |        |        |      |        |      |  |
|                  | Follow-up day 15 | 11 (100%)   | 0 (0%)    | 13.6                               | 18.27 | 2.5   | 6.78   | 19.6   | 1.72  | 64.4 | 11 (100%)   | 0 (0%)    | -8.2 | 14.95 | -26.1  | -0.3   | 0.48 | -35.7  | 2.87 |  |
|                  | Follow-up day 45 | 10 (90.91%) | 1 (9.09%) | 13.5                               | 15.2  | 2.72  | 6.365  | 21.7   | 1.84  | 49   | 10 (90.91%) | 1 (9.09%) | -9.9 | 21.97 | -24    | -0.15  | 1.36 | -48.13 | 13.9 |  |
| Placebo (n=12)   | Visit day 1      | 12 (100%)   | 0 (0%)    | 12.3                               | 14.12 | 2.305 | 6.105  | 19.85  | 1.44  | 45.8 |             |           |      |       |        |        |      |        |      |  |
|                  | Follow-up day 15 | 12 (100%)   | 0 (0%)    | 10.7                               | 12.38 | 2.35  | 5.085  | 17.7   | 1.46  | 42.9 | 12 (100%)   | 0 (0%)    | -1.6 | 3.38  | -3.44  | -0.075 | 0.43 | -9.4   | 1.8  |  |
|                  | Follow-up day 45 | 12 (100%)   | 0 (0%)    | 18.7                               | 30.96 | 2.31  | 5.865  | 12.665 | 0.971 | 90.1 | 12 (100%)   | 0 (0%)    | 6.4  | 21.25 | -2.025 | -0.32  | 2.24 | -13.1  | 56.5 |  |

Executed script: \\SDS-SERVER2\SAS\$\SDS3\Projects\STATISTICS DRUG DEV\NBMI4011 - CTI002\Analyser\Script\SAS\T\_hgp001.sas, on: 23MAY2016:14:00, by: maria.lidsell  
Version of source data: nbmi\_bi3.sas7bdat, last modified: 24FEB16:23:13, status: Final  
External source file: L1606555.csv, downloaded at: 2016-03-30 14:31

Table DE12.1.1 Change from baseline of Urine Hg ( $\mu\text{g/L}$ ) (Full analysis set)

| Treatment        | Visit            | Result      |           | Change from baseline (Visit day 1) |       |       |        |       |      |      |             |           |       |       |        |        |       |        |       |  |
|------------------|------------------|-------------|-----------|------------------------------------|-------|-------|--------|-------|------|------|-------------|-----------|-------|-------|--------|--------|-------|--------|-------|--|
|                  |                  | n           | nmiss     | Mean                               | SD    | Q1    | Median | Q3    | Min  | Max  | n           | nmiss     | Mean  | SD    | Q1     | Median | Q3    | Min    | Max   |  |
| Total (n=36)     | Visit day 1      | 36 (100%)   | 0 (0%)    | 65.2                               | 80.16 | 9.865 | 32.45  | 89.15 | 1.66 | 321  |             |           |       |       |        |        |       |        |       |  |
|                  | Follow-up day 15 | 36 (100%)   | 0 (0%)    | 39.9                               | 42.3  | 9.155 | 26.25  | 55.55 | 1.33 | 161  | 36 (100%)   | 0 (0%)    | -25.3 | 63.93 | -42.5  | -4.49  | 6.785 | -240.9 | 76.1  |  |
|                  | Follow-up day 45 | 35 (97.22%) | 1 (2.78%) | 45                                 | 60.53 | 4.75  | 25.6   | 63.2  | 1.31 | 275  | 35 (97.22%) | 1 (2.78%) | -20.3 | 59.41 | -25.7  | -1.57  | 4.64  | -246.9 | 49.28 |  |
| NBMI100mg (n=13) | Visit day 1      | 13 (100%)   | 0 (0%)    | 56.3                               | 42.4  | 29.9  | 39.1   | 73.9  | 12.6 | 160  |             |           |       |       |        |        |       |        |       |  |
|                  | Follow-up day 15 | 13 (100%)   | 0 (0%)    | 47.5                               | 32.38 | 30.6  | 37.7   | 62.1  | 8.14 | 132  | 13 (100%)   | 0 (0%)    | -8.8  | 50.89 | -41.7  | -6.36  | 24.1  | -128.6 | 76.1  |  |
|                  | Follow-up day 45 | 13 (100%)   | 0 (0%)    | 41.7                               | 26.9  | 25.6  | 39.1   | 63    | 2.64 | 96.1 | 13 (100%)   | 0 (0%)    | -14.7 | 40.39 | -32.36 | -1.5   | 11.8  | -126.5 | 22.2  |  |
| NBMI300mg (n=11) | Visit day 1      | 11 (100%)   | 0 (0%)    | 98.6                               | 115.6 | 9.91  | 26.5   | 213   | 4.22 | 321  |             |           |       |       |        |        |       |        |       |  |
|                  | Follow-up day 15 | 11 (100%)   | 0 (0%)    | 33.1                               | 41.09 | 2.84  | 18.5   | 59.6  | 2.1  | 131  | 11 (100%)   | 0 (0%)    | -65.5 | 84.87 | -153.4 | -8.16  | -2.25 | -240.9 | 0.8   |  |
|                  | Follow-up day 45 | 10 (90.91%) | 1 (9.09%) | 47.2                               | 69.23 | 4.34  | 14.185 | 65.6  | 1.81 | 226  | 10 (90.91%) | 1 (9.09%) | -55   | 87.74 | -127.8 | -6     | -1.57 | -246.9 | 6.8   |  |
| Placebo (n=12)   | Visit day 1      | 12 (100%)   | 0 (0%)    | 44.1                               | 68.14 | 3.915 | 9.16   | 72.5  | 1.66 | 230  |             |           |       |       |        |        |       |        |       |  |
|                  | Follow-up day 15 | 12 (100%)   | 0 (0%)    | 38                                 | 53.8  | 7.175 | 13.9   | 35.8  | 1.33 | 161  | 12 (100%)   | 0 (0%)    | -6.2  | 35.95 | -20.16 | 2.71   | 9.58  | -71.9  | 45.9  |  |
|                  | Follow-up day 45 | 12 (100%)   | 0 (0%)    | 46.7                               | 81.2  | 3.91  | 11.25  | 42.65 | 1.31 | 275  | 12 (100%)   | 0 (0%)    | 2.6   | 33.59 | -6.025 | 0.12   | 22.77 | -74.7  | 49.28 |  |

Executed script: \\SDS-SERVER2\SAS\$\SDS3\Projects\STATISTICS DRUG DEV\NBMI4011 - CTI002\Analyser\Script\SAS\T\_hgu002.sas, on: 23MAY2016:14:00, by: maria.lidsell  
Version of source data: nbmi\_bi3.sas7bdat, last modified: 24FEB16:23:13, status: Final  
External source file: L1606554.csv, downloaded at: 2016-04-04 13:22

Table DE12.2.1 Change from baseline of Urine Hg ( $\mu\text{g/g}$  Creatinine) (Full analysis set)

| Treatment        | Visit            | Result      |           | Change from baseline (Visit day 1) |        |       |        |        |       |         |             |           |        |        |        |        |       |         |         |
|------------------|------------------|-------------|-----------|------------------------------------|--------|-------|--------|--------|-------|---------|-------------|-----------|--------|--------|--------|--------|-------|---------|---------|
|                  |                  | n           | nmiss     | Mean                               | SD     | Q1    | Median | Q3     | Min   | Max     | n           | nmiss     | Mean   | SD     | Q1     | Median | Q3    | Min     | Max     |
| Total (n=36)     | Visit day 1      | 36 (100%)   | 0 (0%)    | 127.4                              | 180.07 | 17.41 | 55.02  | 167.23 | 2.63  | 773.2   |             |           |        |        |        |        |       |         |         |
|                  | Follow-up day 15 | 36 (100%)   | 0 (0%)    | 89.6                               | 109.7  | 17.53 | 64.22  | 110.55 | 1.81  | 536.67  | 36 (100%)   | 0 (0%)    | -37.8  | 147.31 | -40.9  | -4.31  | 15.87 | -475.47 | 297.08  |
|                  | Follow-up day 45 | 35 (97.22%) | 1 (2.78%) | 178.8                              | 429.6  | 9.56  | 38.58  | 120.13 | 0.4   | 1883.33 | 35 (97.22%) | 1 (2.78%) | 50.8   | 353.07 | -44.1  | -6.54  | 11.68 | -463.33 | 1557.8  |
| NBMI100mg (n=13) | Visit day 1      | 13 (100%)   | 0 (0%)    | 84.9                               | 59.6   | 31.82 | 66.67  | 107.76 | 12.39 | 200     |             |           |        |        |        |        |       |         |         |
|                  | Follow-up day 15 | 13 (100%)   | 0 (0%)    | 90.9                               | 73.1   | 35.28 | 64.36  | 138.45 | 17.18 | 241     | 13 (100%)   | 0 (0%)    | 6      | 69.26  | -39.29 | 8.21   | 38    | -135.92 | 122.81  |
|                  | Follow-up day 45 | 13 (100%)   | 0 (0%)    | 92.6                               | 89.34  | 38.58 | 53.27  | 120.13 | 13.2  | 340.21  | 13 (100%)   | 0 (0%)    | 7.7    | 94     | -28.86 | -13.79 | 11.68 | -140.18 | 232.45  |
| NBMI300mg (n=11) | Visit day 1      | 11 (100%)   | 0 (0%)    | 199.1                              | 271.33 | 15.07 | 62.35  | 411.54 | 7.58  | 773.2   |             |           |        |        |        |        |       |         |         |
|                  | Follow-up day 15 | 11 (100%)   | 0 (0%)    | 89.7                               | 108.24 | 8.63  | 65.15  | 97.5   | 2.63  | 298     | 11 (100%)   | 0 (0%)    | -109.3 | 175.9  | -302   | -24.6  | -0.84 | -475.47 | 79      |
|                  | Follow-up day 45 | 10 (90.91%) | 1 (9.09%) | 275.5                              | 587.17 | 5.42  | 34.79  | 136.67 | 2.93  | 1883.33 | 10 (90.91%) | 1 (9.09%) | 67.1   | 397.61 | -53.19 | -3.96  | 24.7  | -463.33 | 1110.14 |
| Placebo (n=12)   | Visit day 1      | 12 (100%)   | 0 (0%)    | 107.8                              | 157.07 | 9.59  | 18.74  | 208.06 | 2.63  | 488.5   |             |           |        |        |        |        |       |         |         |
|                  | Follow-up day 15 | 12 (100%)   | 0 (0%)    | 88.1                               | 147.67 | 15.01 | 29.75  | 96.22  | 1.81  | 536.67  | 12 (100%)   | 0 (0%)    | -19.7  | 167.14 | -23.36 | 1.77   | 15.87 | -407.88 | 297.08  |
|                  | Follow-up day 45 | 12 (100%)   | 0 (0%)    | 191.6                              | 512.04 | 7.25  | 9.86   | 73.26  | 0.4   | 1797.39 | 12 (100%)   | 0 (0%)    | 83.8   | 492.65 | -79.87 | -5.86  | -1.43 | -453.65 | 1557.8  |

Executed script: \\SDS-SERVER2\SAS\$\SDS3\Projects\STATISTICS DRUG DEV\NBMI4011 - CTI002\Analyser\Script\SAS\T\_hgu002.sas, on: 23MAY2016:14:00, by: maria.lidsell  
Version of source data: nbmi\_bi3.sas7bdat, last modified: 24FEB16:23:13, status: Final  
External source file: L1606554.csv, downloaded at: 2016-04-04 13:22

Table E1.1 Statistical analysis (ANCOVA) of change from baseline of Mercury intoxication medical score sum (Full analysis set)

| Visit            | Treatment | n  | LSmean    | 95% CI          | Difference from Placebo |                 | P-value |
|------------------|-----------|----|-----------|-----------------|-------------------------|-----------------|---------|
|                  |           |    |           |                 | LSmean                  | 95% CI          |         |
| Follow-up day 15 | NBMI100mg | 13 | -2.308823 | (-3.017,-1.601) | 0.189                   | (-0.904, 1.283) | 0.7267  |
|                  | NBMI300mg | 11 | -3.182585 | (-3.939,-2.426) | -0.685                  | (-1.796, 0.427) | 0.2186  |
|                  | Placebo   | 12 | -2.498073 | (-3.270,-1.726) | .                       | .               | .       |

Executed script: \\SDS-SERVER2\SAS\$\SDS3\Projects\STATISTICS DRUG DEV\NBMI4011 - CTI002\Analyser\Script\SAS\A\_ms001.sas, on:  
 17MAR2016:16:40, by: maria.lidsell  
 Version of source data: nbmi\_ma2.sas7bdat, last modified: 24FEB16:22:13, status: Final



Table E2.1.1 Statistical analysis (Wilcoxon's two-sample test) of change from baseline of Neuro-motoric test battery (CATSYS) Tremor intensity (Full analysis set)

| Hand  | Visit            | Treatment | n  | Median | Mean Score | Sum of Scores | Comparison vs. Placebo |         |
|-------|------------------|-----------|----|--------|------------|---------------|------------------------|---------|
|       |                  |           |    |        |            |               | Statistic              | P-value |
| Right | Follow-up day 15 | NBMI300mg | 11 | 0.01   | 11.23      | 123.50        | 123.50                 | 0.6212  |
|       |                  | Placebo   | 12 | 0.01   | 12.71      | 152.50        | .                      | .       |

Table E2.2.1 Statistical analysis (Wilcoxon's two-sample test) of change from baseline of Neuro-motoric test battery (CATSYS) Tremor intensity (Full analysis set)

| Hand  | Visit            | Treatment | n  | Median | Mean Score | Sum of Scores | Comparison vs. Placebo |         |
|-------|------------------|-----------|----|--------|------------|---------------|------------------------|---------|
|       |                  |           |    |        |            |               | Statistic              | P-value |
| Right | Follow-up day 15 | NBMI100mg | 13 | 0      | 11.73      | 152.50        | 172.50                 | 0.3824  |
|       |                  | Placebo   | 12 | 0.01   | 14.38      | 172.50        | .                      | .       |

Table E2.3.1 Statistical analysis (Wilcoxon's two-sample test) of change from baseline of Neuro-motoric test battery (CATSYS) Tremor intensity (Full analysis set)

| Hand | Visit            | Treatment | n  | Median | Mean Score | Sum of Scores | Comparison vs. Placebo |         |
|------|------------------|-----------|----|--------|------------|---------------|------------------------|---------|
|      |                  |           |    |        |            |               | Statistic              | P-value |
| Left | Follow-up day 15 | NBMI300mg | 11 | 0.01   | 10.64      | 117.0         | 117.00                 | 0.3690  |
|      |                  | Placebo   | 12 | 0.01   | 13.25      | 159.0         | .                      | .       |

Table E2.4.1 Statistical analysis (Wilcoxon's two-sample test) of change from baseline of Neuro-motoric test battery (CATSYS) Tremor intensity (Full analysis set)

| Hand | Visit            | Treatment | n  | Median | Mean Score | Sum of Scores | Comparison vs. Placebo |         |
|------|------------------|-----------|----|--------|------------|---------------|------------------------|---------|
|      |                  |           |    |        |            |               | Statistic              | P-value |
| Left | Follow-up day 15 | NBMI100mg | 13 | -0.01  | 10.23      | 133.0         | 192.00                 | 0.0527  |
|      |                  | Placebo   | 12 | 0.01   | 16.00      | 192.0         | .                      | .       |

Executed script: \\SDS-SERVER2\SAS\$\SDS3\Projects\STATISTICS DRUG DEV\NBMI4011 - CTI002\Analyser\Script\SAS\A\_cat001.sas, on: 17MAR2016:16:40, by: maria.lidsell

Version of source data: nbmi\_neu.sas7bdat, last modified: 24FEB16:22:13, status: Final

Table E3.1.1 Statistical analysis (MMRM) of physical and mental fatigue sum scores - Total fatigue score sum (Full analysis set)

| Visit            | Treatment | n  | LSmean | 95% CI          | Difference from Placebo |                 |         |
|------------------|-----------|----|--------|-----------------|-------------------------|-----------------|---------|
|                  |           |    |        |                 | LSmean                  | 95% CI          | P-value |
| Follow-up day 15 | NBMI100mg | 13 | -5.769 | (-8.364,-3.175) | -2.436                  | (-5.815, 0.943) | 0.1572  |
|                  | NBMI300mg | 11 | -6.727 | (-9.343,-4.112) | -3.394                  | (-6.789, 0.002) | 0.0501  |
|                  | Placebo   | 12 | -3.333 | (-5.499,-1.168) | .                       | .               | .       |

Table E3.2.1 Statistical analysis (MMRM) of physical and mental fatigue sum scores - Physical fatigue score sum (Full analysis set)

| Visit            | Treatment | n  | LSmean | 95% CI          | Difference from Placebo |                 |         |
|------------------|-----------|----|--------|-----------------|-------------------------|-----------------|---------|
|                  |           |    |        |                 | LSmean                  | 95% CI          | P-value |
| Follow-up day 15 | NBMI100mg | 13 | -3.769 | (-5.343,-2.195) | -1.353                  | (-3.433, 0.728) | 0.2019  |
|                  | NBMI300mg | 11 | -4.545 | (-6.049,-3.042) | -2.129                  | (-4.156,-0.102) | 0.0396  |
|                  | Placebo   | 12 | -2.417 | (-3.777,-1.057) | .                       | .               | .       |

Table E3.3.1 Statistical analysis (MMRM) of physical and mental fatigue sum scores - Mental fatigue score sum (Full analysis set)

| Visit            | Treatment | n  | LSmean | 95% CI          | Difference from Placebo |                 |         |
|------------------|-----------|----|--------|-----------------|-------------------------|-----------------|---------|
|                  |           |    |        |                 | LSmean                  | 95% CI          | P-value |
| Follow-up day 15 | NBMI100mg | 13 | -2.000 | (-3.048,-0.952) | -1.083                  | (-2.432, 0.266) | 0.1152  |
|                  | NBMI300mg | 11 | -2.182 | (-3.335,-1.029) | -1.265                  | (-2.698, 0.167) | 0.0833  |
|                  | Placebo   | 12 | -0.917 | (-1.767,-0.067) | .                       | .               | .       |

Executed script: \\SDS-SERVER2\SAS\$\SDS3\Projects\STATISTICS DRUG DEV\NBMI4011 - CTI002\Analyser\Script\SAS\A\_fs001.sas, on: 17MAR2016:16:40, by: maria.lidsell  
Version of source data: nbmi\_ph3.sas7bdat, last modified: 24FEB16:22:13, status: Final

Table E4.1.1 Statistical analysis (Wilcoxon's two sample test) of change from baseline of Tremor finger-to-nose test (Full analysis set)

| Visit            | Treatment | n  | Median | Mean Score | Sum of Scores | Comparison vs. Placebo |         |
|------------------|-----------|----|--------|------------|---------------|------------------------|---------|
|                  |           |    |        |            |               | Statistic              | P-value |
| Follow-up day 15 | NBMI100mg | 13 | 0      | 13.35      | 173.50        | 151.50                 | 0.9437  |
|                  | Placebo   | 12 | 0      | 12.63      | 151.50        | .                      | .       |

Table E4.2.1 Statistical analysis (Wilcoxon's two sample test) of change from baseline of Tremor finger-to-nose test (Full analysis set)

| Visit            | Treatment | n  | Median | Mean Score | Sum of Scores | Comparison vs. Placebo |         |
|------------------|-----------|----|--------|------------|---------------|------------------------|---------|
|                  |           |    |        |            |               | Statistic              | P-value |
| Follow-up day 15 | NBMI300mg | 11 | 0      | 11.55      | 127.0         | 127.00                 | 0.8108  |
|                  | Placebo   | 12 | 0      | 12.42      | 149.0         | .                      | .       |

Executed script: \\SDS-SERVER2\SAS\$\SDS3\Projects\STATISTICS DRUG DEV\NBMI4011 - CTI002\Analyser\Script\SAS\A\_tfn001.sas, on: 17MAR2016:16:40, by: maria.lidsell  
Version of source data: nbmi\_tre.sas7bdat, last modified: 24FEB16:22:14, status: Final

Table E5.1.1 Statistical analysis (Wilcoxon's two sample test) of change from baseline of plasma Hg ( $\mu\text{g/L}$ ) (Full analysis set)

| Visit            | Treatment | n  | Median | Mean Score | Sum of Scores | Comparison vs. Placebo |         |
|------------------|-----------|----|--------|------------|---------------|------------------------|---------|
|                  |           |    |        |            |               | Statistic              | P-value |
| Follow-up day 15 | NBMI100mg | 13 | -0.7   | 13.81      | 179.50        | 145.50                 | 0.5864  |
|                  | Placebo   | 12 | -0.075 | 12.13      | 145.50        | .                      | .       |

Executed script: \\SDS-SERVER2\SAS\$\SDS3\Projects\STATISTICS DRUG DEV\NBMI4011 - CTI002\Analyser\Script\SAS\A\_hgp001.sas, on: 23MAY2016:12:30, by: maria.lidsell  
 Version of source data: nbmi\_bi3.sas7bdat, last modified: 24FEB16:23:13, status: Final  
 External source file: L1606555.csv, downloaded at: 2016-03-30 14:31

Table E5.2.1 Statistical analysis (Wilcoxon's two sample test) of change from baseline of plasma Hg ( $\mu\text{g/L}$ ) (Full analysis set)

| Visit            | Treatment | n  | Median | Mean Score | Sum of Scores | Comparison vs. Placebo |         |
|------------------|-----------|----|--------|------------|---------------|------------------------|---------|
|                  |           |    |        |            |               | Statistic              | P-value |
| Follow-up day 15 | NBMI300mg | 11 | -0.3   | 11.55      | 127.0         | 127.00                 | 0.7818  |
|                  | Placebo   | 12 | -0.075 | 12.42      | 149.0         | .                      | .       |

Executed script: \\SDS-SERVER2\SAS\$\SDS3\Projects\STATISTICS DRUG DEV\NBMI4011 - CTI002\Analyser\Script\SAS\A\_hgp001.sas, on: 23MAY2016:12:30, by: maria.lidsell  
 Version of source data: nbmi\_bi3.sas7bdat, last modified: 24FEB16:23:13, status: Final  
 External source file: L1606555.csv, downloaded at: 2016-03-30 14:31

Table E6.1.1 Statistical analysis (Wilcoxon's two sample test) of change from baseline of urine Hg ( $\mu\text{g/L}$ ) (Full analysis set)

| Visit            | Treatment | n  | Median | Mean Score | Sum of Scores | Comparison vs. Placebo |         |
|------------------|-----------|----|--------|------------|---------------|------------------------|---------|
|                  |           |    |        |            |               | Statistic              | P-value |
| Follow-up day 15 | NBMI100mg | 13 | -6.36  | 12.77      | 166.0         | 159.00                 | 0.8918  |
|                  | Placebo   | 12 | 2.71   | 13.25      | 159.0         | .                      | .       |

Executed script: \\SDS-SERVER2\SAS\$\SDS3\Projects\STATISTICS DRUG DEV\NBMI4011 - CTI002\Analyser\Script\SAS\A\_hgu001.sas, on: 23MAY2016:12:30, by: maria.lidsell  
Version of source data: nbmi\_bi3.sas7bdat, last modified: 24FEB16:23:13, status: Final  
External source file: L1606554.csv, downloaded at: 2016-04-04 13:22

Table E6.2.1 Statistical analysis (Wilcoxon's two sample test) of change from baseline of urine Hg ( $\mu\text{g/L}$ ) (Full analysis set)

| Visit            | Treatment | n  | Median | Mean Score | Sum of Scores | Comparison vs. Placebo |         |
|------------------|-----------|----|--------|------------|---------------|------------------------|---------|
|                  |           |    |        |            |               | Statistic              | P-value |
| Follow-up day 15 | NBMI300mg | 11 | -8.16  | 8.18       | 90.0          | 90.00                  | 0.0106  |
|                  | Placebo   | 12 | 2.71   | 15.50      | 186.0         | .                      | .       |

Executed script: \\SDS-SERVER2\SAS\$\SDS3\Projects\STATISTICS DRUG DEV\NBMI4011 - CTI002\Analyser\Script\SAS\A\_hgu001.sas, on: 23MAY2016:12:30, by: maria.lidsell  
Version of source data: nbmi\_bi3.sas7bdat, last modified: 24FEB16:23:13, status: Final  
External source file: L1606554.csv, downloaded at: 2016-04-04 13:22

Table E6.3.1 Statistical analysis (Wilcoxon's two sample test) of change from baseline of urine Hg ( $\mu\text{g/g}$  Creatinine) (Full analysis set)

| Visit            | Treatment | n  | Median    | Mean Score | Sum of Scores | Comparison vs. Placebo |         |
|------------------|-----------|----|-----------|------------|---------------|------------------------|---------|
|                  |           |    |           |            |               | Statistic              | P-value |
| Follow-up day 15 | NBMI100mg | 13 | 8.2053963 | 13.31      | 173.0         | 152.00                 | 0.8490  |
|                  | Placebo   | 12 | 1.7692093 | 12.67      | 152.0         | .                      | .       |

Executed script: \\SDS-SERVER2\SAS\$\SDS3\Projects\STATISTICS DRUG DEV\NBMI4011 - CTI002\Analyser\Script\SAS\A\_hgu001.sas, on: 23MAY2016:12:30, by: maria.lidsell  
Version of source data: nbmi\_bi3.sas7bdat, last modified: 24FEB16:23:13, status: Final  
External source file: L1606554.csv, downloaded at: 2016-04-04 13:22

Table E6.4.1 Statistical analysis (Wilcoxon's two sample test) of change from baseline of urine Hg ( $\mu\text{g/g}$  Creatinine) (Full analysis set)

| Visit            | Treatment | n  | Median    | Mean Score | Sum of Scores | Comparison vs. Placebo |         |
|------------------|-----------|----|-----------|------------|---------------|------------------------|---------|
|                  |           |    |           |            |               | Statistic              | P-value |
| Follow-up day 15 | NBMI300mg | 11 | -24.59784 | 9.45       | 104.0         | 104.00                 | 0.0905  |
|                  | Placebo   | 12 | 1.7692093 | 14.33      | 172.0         | .                      | .       |

Executed script: \\SDS-SERVER2\SAS\$\SDS3\Projects\STATISTICS DRUG DEV\NBMI4011 - CTI002\Analyser\Script\SAS\A\_hgu001.sas, on: 23MAY2016:12:30, by: maria.lidsell

Version of source data: nbmi\_bi3.sas7bdat, last modified: 24FEB16:23:13, status: Final

External source file: L1606554.csv, downloaded at: 2016-04-04 13:22
